# Supplementary material for: Human Empathy, Personality and Experience Affect the Emotion Ratings of Dog and Human Facial Expressions
Source: PLoS One. 2017 Jan 23;12(1):e0170730. doi: 10.1371/journal.pone.0170730 (PMC5257001; doi:10.1371/journal.pone.0170730)
Supplement: S1 Dataset — (XLSX) [file pone.0170730.s004.xlsx]

## Sheet: Data
S01	ThreateningDogs_arousal	38	male	80	327	4	3.25	2.25	19	20	18	15	5.4	4.9	5.4	1.8	1.3	1	1.1	1	4.3	3.5	2.8	1.8	1.7	1	1.5	1	3.4	3.4	1	2.3	1	1.6	1.5	1.3	3.6	3.2	1.2	3.1	2	1.1	1.7	1	1.8	6.2	1.5	1.2	1.6
S01	ThreateningDogs_happiness	38	male	80	327	4	3.25	2.25	19	20	18	15	5.4	4.9	5.4	1.8	1.3	1	1.1	1	4.3	3.5	2.8	1.8	1.7	1	1.5	1	3.4	3.4	1	2.3	1	1.6	1.5	1.3	3.6	3.2	1.2	3.1	2	1.1	1.7	1	1.8	6.2	1.5	1.2	1.6
S01	ThreateningDogs_disgust	38	male	80	327	4	3.25	2.25	19	20	18	15	5.4	4.9	5.4	1.8	1.3	1	1.1	1	4.3	3.5	2.8	1.8	1.7	1	1.5	1	3.4	3.4	1	2.3	1	1.6	1.5	1.3	3.6	3.2	1.2	3.1	2	1.1	1.7	1	1.8	6.2	1.5	1.2	1.6
S01	ThreateningDogs_fear	38	male	80	327	4	3.25	2.25	19	20	18	15	5.4	4.9	5.4	1.8	1.3	1	1.1	1	4.3	3.5	2.8	1.8	1.7	1	1.5	1	3.4	3.4	1	2.3	1	1.6	1.5	1.3	3.6	3.2	1.2	3.1	2	1.1	1.7	1	1.8	6.2	1.5	1.2	1.6
S01	ThreateningDogs_sadness	38	male	80	327	4	3.25	2.25	19	20	18	15	5.4	4.9	5.4	1.8	1.3	1	1.1	1	4.3	3.5	2.8	1.8	1.7	1	1.5	1	3.4	3.4	1	2.3	1	1.6	1.5	1.3	3.6	3.2	1.2	3.1	2	1.1	1.7	1	1.8	6.2	1.5	1.2	1.6
S01	ThreateningDogs_valence	38	male	80	327	4	3.25	2.25	19	20	18	15	5.4	4.9	5.4	1.8	1.3	1	1.1	1	4.3	3.5	2.8	1.8	1.7	1	1.5	1	3.4	3.4	1	2.3	1	1.6	1.5	1.3	3.6	3.2	1.2	3.1	2	1.1	1.7	1	1.8	6.2	1.5	1.2	1.6
S01	ThreateningDogs_anger	38	male	80	327	4	3.25	2.25	19	20	18	15	5.4	4.9	5.4	1.8	1.3	1	1.1	1	4.3	3.5	2.8	1.8	1.7	1	1.5	1	3.4	3.4	1	2.3	1	1.6	1.5	1.3	3.6	3.2	1.2	3.1	2	1.1	1.7	1	1.8	6.2	1.5	1.2	1.6
S01	ThreateningDogs_surprise	38	male	80	327	4	3.25	2.25	19	20	18	15	5.4	4.9	5.4	1.8	1.3	1	1.1	1	4.3	3.5	2.8	1.8	1.7	1	1.5	1	3.4	3.4	1	2.3	1	1.6	1.5	1.3	3.6	3.2	1.2	3.1	2	1.1	1.7	1	1.8	6.2	1.5	1.2	1.6
S01	ThreateningHumans_arousal	38	male	80	327	4	3.25	2.25	19	20	18	15	5.4	4.9	5.4	1.8	1.3	1	1.1	1	4.3	3.5	2.8	1.8	1.7	1	1.5	1	3.4	3.4	1	2.3	1	1.6	1.5	1.3	3.6	3.2	1.2	3.1	2	1.1	1.7	1	1.8	6.2	1.5	1.2	1.6
S01	ThreateningHumans_happiness	38	male	80	327	4	3.25	2.25	19	20	18	15	5.4	4.9	5.4	1.8	1.3	1	1.1	1	4.3	3.5	2.8	1.8	1.7	1	1.5	1	3.4	3.4	1	2.3	1	1.6	1.5	1.3	3.6	3.2	1.2	3.1	2	1.1	1.7	1	1.8	6.2	1.5	1.2	1.6
S01	ThreateningHumans_disgust	38	male	80	327	4	3.25	2.25	19	20	18	15	5.4	4.9	5.4	1.8	1.3	1	1.1	1	4.3	3.5	2.8	1.8	1.7	1	1.5	1	3.4	3.4	1	2.3	1	1.6	1.5	1.3	3.6	3.2	1.2	3.1	2	1.1	1.7	1	1.8	6.2	1.5	1.2	1.6
S01	ThreateningHumans_fear	38	male	80	327	4	3.25	2.25	19	20	18	15	5.4	4.9	5.4	1.8	1.3	1	1.1	1	4.3	3.5	2.8	1.8	1.7	1	1.5	1	3.4	3.4	1	2.3	1	1.6	1.5	1.3	3.6	3.2	1.2	3.1	2	1.1	1.7	1	1.8	6.2	1.5	1.2	1.6
S01	ThreateningHumans_sadness	38	male	80	327	4	3.25	2.25	19	20	18	15	5.4	4.9	5.4	1.8	1.3	1	1.1	1	4.3	3.5	2.8	1.8	1.7	1	1.5	1	3.4	3.4	1	2.3	1	1.6	1.5	1.3	3.6	3.2	1.2	3.1	2	1.1	1.7	1	1.8	6.2	1.5	1.2	1.6
S01	ThreateningHumans_valence	38	male	80	327	4	3.25	2.25	19	20	18	15	5.4	4.9	5.4	1.8	1.3	1	1.1	1	4.3	3.5	2.8	1.8	1.7	1	1.5	1	3.4	3.4	1	2.3	1	1.6	1.5	1.3	3.6	3.2	1.2	3.1	2	1.1	1.7	1	1.8	6.2	1.5	1.2	1.6
S01	ThreateningHumans_anger	38	male	80	327	4	3.25	2.25	19	20	18	15	5.4	4.9	5.4	1.8	1.3	1	1.1	1	4.3	3.5	2.8	1.8	1.7	1	1.5	1	3.4	3.4	1	2.3	1	1.6	1.5	1.3	3.6	3.2	1.2	3.1	2	1.1	1.7	1	1.8	6.2	1.5	1.2	1.6
S01	ThreateningHumans_surprise	38	male	80	327	4	3.25	2.25	19	20	18	15	5.4	4.9	5.4	1.8	1.3	1	1.1	1	4.3	3.5	2.8	1.8	1.7	1	1.5	1	3.4	3.4	1	2.3	1	1.6	1.5	1.3	3.6	3.2	1.2	3.1	2	1.1	1.7	1	1.8	6.2	1.5	1.2	1.6
S01	PleasantDogs_arousal	38	male	80	327	4	3.25	2.25	19	20	18	15	5.4	4.9	5.4	1.8	1.3	1	1.1	1	4.3	3.5	2.8	1.8	1.7	1	1.5	1	3.4	3.4	1	2.3	1	1.6	1.5	1.3	3.6	3.2	1.2	3.1	2	1.1	1.7	1	1.8	6.2	1.5	1.2	1.6
S01	PleasantDogs_happiness	38	male	80	327	4	3.25	2.25	19	20	18	15	5.4	4.9	5.4	1.8	1.3	1	1.1	1	4.3	3.5	2.8	1.8	1.7	1	1.5	1	3.4	3.4	1	2.3	1	1.6	1.5	1.3	3.6	3.2	1.2	3.1	2	1.1	1.7	1	1.8	6.2	1.5	1.2	1.6
S01	PleasantDogs_disgust	38	male	80	327	4	3.25	2.25	19	20	18	15	5.4	4.9	5.4	1.8	1.3	1	1.1	1	4.3	3.5	2.8	1.8	1.7	1	1.5	1	3.4	3.4	1	2.3	1	1.6	1.5	1.3	3.6	3.2	1.2	3.1	2	1.1	1.7	1	1.8	6.2	1.5	1.2	1.6
S01	PleasantDogs_fear	38	male	80	327	4	3.25	2.25	19	20	18	15	5.4	4.9	5.4	1.8	1.3	1	1.1	1	4.3	3.5	2.8	1.8	1.7	1	1.5	1	3.4	3.4	1	2.3	1	1.6	1.5	1.3	3.6	3.2	1.2	3.1	2	1.1	1.7	1	1.8	6.2	1.5	1.2	1.6
S01	PleasantDogs_sadness	38	male	80	327	4	3.25	2.25	19	20	18	15	5.4	4.9	5.4	1.8	1.3	1	1.1	1	4.3	3.5	2.8	1.8	1.7	1	1.5	1	3.4	3.4	1	2.3	1	1.6	1.5	1.3	3.6	3.2	1.2	3.1	2	1.1	1.7	1	1.8	6.2	1.5	1.2	1.6
S01	PleasantDogs_valence	38	male	80	327	4	3.25	2.25	19	20	18	15	5.4	4.9	5.4	1.8	1.3	1	1.1	1	4.3	3.5	2.8	1.8	1.7	1	1.5	1	3.4	3.4	1	2.3	1	1.6	1.5	1.3	3.6	3.2	1.2	3.1	2	1.1	1.7	1	1.8	6.2	1.5	1.2	1.6
S01	PleasantDogs_anger	38	male	80	327	4	3.25	2.25	19	20	18	15	5.4	4.9	5.4	1.8	1.3	1	1.1	1	4.3	3.5	2.8	1.8	1.7	1	1.5	1	3.4	3.4	1	2.3	1	1.6	1.5	1.3	3.6	3.2	1.2	3.1	2	1.1	1.7	1	1.8	6.2	1.5	1.2	1.6
S01	PleasantDogs_surprise	38	male	80	327	4	3.25	2.25	19	20	18	15	5.4	4.9	5.4	1.8	1.3	1	1.1	1	4.3	3.5	2.8	1.8	1.7	1	1.5	1	3.4	3.4	1	2.3	1	1.6	1.5	1.3	3.6	3.2	1.2	3.1	2	1.1	1.7	1	1.8	6.2	1.5	1.2	1.6
S01	PleasantHumans_arousal	38	male	80	327	4	3.25	2.25	19	20	18	15	5.4	4.9	5.4	1.8	1.3	1	1.1	1	4.3	3.5	2.8	1.8	1.7	1	1.5	1	3.4	3.4	1	2.3	1	1.6	1.5	1.3	3.6	3.2	1.2	3.1	2	1.1	1.7	1	1.8	6.2	1.5	1.2	1.6
S01	PleasantHumans_happiness	38	male	80	327	4	3.25	2.25	19	20	18	15	5.4	4.9	5.4	1.8	1.3	1	1.1	1	4.3	3.5	2.8	1.8	1.7	1	1.5	1	3.4	3.4	1	2.3	1	1.6	1.5	1.3	3.6	3.2	1.2	3.1	2	1.1	1.7	1	1.8	6.2	1.5	1.2	1.6
S01	PleasantHumans_disgust	38	male	80	327	4	3.25	2.25	19	20	18	15	5.4	4.9	5.4	1.8	1.3	1	1.1	1	4.3	3.5	2.8	1.8	1.7	1	1.5	1	3.4	3.4	1	2.3	1	1.6	1.5	1.3	3.6	3.2	1.2	3.1	2	1.1	1.7	1	1.8	6.2	1.5	1.2	1.6
S01	PleasantHumans_fear	38	male	80	327	4	3.25	2.25	19	20	18	15	5.4	4.9	5.4	1.8	1.3	1	1.1	1	4.3	3.5	2.8	1.8	1.7	1	1.5	1	3.4	3.4	1	2.3	1	1.6	1.5	1.3	3.6	3.2	1.2	3.1	2	1.1	1.7	1	1.8	6.2	1.5	1.2	1.6
S01	PleasantHumans_sadness	38	male	80	327	4	3.25	2.25	19	20	18	15	5.4	4.9	5.4	1.8	1.3	1	1.1	1	4.3	3.5	2.8	1.8	1.7	1	1.5	1	3.4	3.4	1	2.3	1	1.6	1.5	1.3	3.6	3.2	1.2	3.1	2	1.1	1.7	1	1.8	6.2	1.5	1.2	1.6
S01	PleasantHumans_valence	38	male	80	327	4	3.25	2.25	19	20	18	15	5.4	4.9	5.4	1.8	1.3	1	1.1	1	4.3	3.5	2.8	1.8	1.7	1	1.5	1	3.4	3.4	1	2.3	1	1.6	1.5	1.3	3.6	3.2	1.2	3.1	2	1.1	1.7	1	1.8	6.2	1.5	1.2	1.6
S01	PleasantHumans_anger	38	male	80	327	4	3.25	2.25	19	20	18	15	5.4	4.9	5.4	1.8	1.3	1	1.1	1	4.3	3.5	2.8	1.8	1.7	1	1.5	1	3.4	3.4	1	2.3	1	1.6	1.5	1.3	3.6	3.2	1.2	3.1	2	1.1	1.7	1	1.8	6.2	1.5	1.2	1.6
S01	PleasantHumans_surprise	38	male	80	327	4	3.25	2.25	19	20	18	15	5.4	4.9	5.4	1.8	1.3	1	1.1	1	4.3	3.5	2.8	1.8	1.7	1	1.5	1	3.4	3.4	1	2.3	1	1.6	1.5	1.3	3.6	3.2	1.2	3.1	2	1.1	1.7	1	1.8	6.2	1.5	1.2	1.6
S01	NeutralDogs_arousal	38	male	80	327	4	3.25	2.25	19	20	18	15	5.4	4.9	5.4	1.8	1.3	1	1.1	1	4.3	3.5	2.8	1.8	1.7	1	1.5	1	3.4	3.4	1	2.3	1	1.6	1.5	1.3	3.6	3.2	1.2	3.1	2	1.1	1.7	1	1.8	6.2	1.5	1.2	1.6
S01	NeutralDogs_happiness	38	male	80	327	4	3.25	2.25	19	20	18	15	5.4	4.9	5.4	1.8	1.3	1	1.1	1	4.3	3.5	2.8	1.8	1.7	1	1.5	1	3.4	3.4	1	2.3	1	1.6	1.5	1.3	3.6	3.2	1.2	3.1	2	1.1	1.7	1	1.8	6.2	1.5	1.2	1.6
S01	NeutralDogs_disgust	38	male	80	327	4	3.25	2.25	19	20	18	15	5.4	4.9	5.4	1.8	1.3	1	1.1	1	4.3	3.5	2.8	1.8	1.7	1	1.5	1	3.4	3.4	1	2.3	1	1.6	1.5	1.3	3.6	3.2	1.2	3.1	2	1.1	1.7	1	1.8	6.2	1.5	1.2	1.6
S01	NeutralDogs_fear	38	male	80	327	4	3.25	2.25	19	20	18	15	5.4	4.9	5.4	1.8	1.3	1	1.1	1	4.3	3.5	2.8	1.8	1.7	1	1.5	1	3.4	3.4	1	2.3	1	1.6	1.5	1.3	3.6	3.2	1.2	3.1	2	1.1	1.7	1	1.8	6.2	1.5	1.2	1.6
S01	NeutralDogs_sadness	38	male	80	327	4	3.25	2.25	19	20	18	15	5.4	4.9	5.4	1.8	1.3	1	1.1	1	4.3	3.5	2.8	1.8	1.7	1	1.5	1	3.4	3.4	1	2.3	1	1.6	1.5	1.3	3.6	3.2	1.2	3.1	2	1.1	1.7	1	1.8	6.2	1.5	1.2	1.6
S01	NeutralDogs_valence	38	male	80	327	4	3.25	2.25	19	20	18	15	5.4	4.9	5.4	1.8	1.3	1	1.1	1	4.3	3.5	2.8	1.8	1.7	1	1.5	1	3.4	3.4	1	2.3	1	1.6	1.5	1.3	3.6	3.2	1.2	3.1	2	1.1	1.7	1	1.8	6.2	1.5	1.2	1.6
S01	NeutralDogs_anger	38	male	80	327	4	3.25	2.25	19	20	18	15	5.4	4.9	5.4	1.8	1.3	1	1.1	1	4.3	3.5	2.8	1.8	1.7	1	1.5	1	3.4	3.4	1	2.3	1	1.6	1.5	1.3	3.6	3.2	1.2	3.1	2	1.1	1.7	1	1.8	6.2	1.5	1.2	1.6
S01	NeutralDogs_surprise	38	male	80	327	4	3.25	2.25	19	20	18	15	5.4	4.9	5.4	1.8	1.3	1	1.1	1	4.3	3.5	2.8	1.8	1.7	1	1.5	1	3.4	3.4	1	2.3	1	1.6	1.5	1.3	3.6	3.2	1.2	3.1	2	1.1	1.7	1	1.8	6.2	1.5	1.2	1.6
S01	NeutralHumans_arousal	38	male	80	327	4	3.25	2.25	19	20	18	15	5.4	4.9	5.4	1.8	1.3	1	1.1	1	4.3	3.5	2.8	1.8	1.7	1	1.5	1	3.4	3.4	1	2.3	1	1.6	1.5	1.3	3.6	3.2	1.2	3.1	2	1.1	1.7	1	1.8	6.2	1.5	1.2	1.6
S01	NeutralHumans_happiness	38	male	80	327	4	3.25	2.25	19	20	18	15	5.4	4.9	5.4	1.8	1.3	1	1.1	1	4.3	3.5	2.8	1.8	1.7	1	1.5	1	3.4	3.4	1	2.3	1	1.6	1.5	1.3	3.6	3.2	1.2	3.1	2	1.1	1.7	1	1.8	6.2	1.5	1.2	1.6
S01	NeutralHumans_disgust	38	male	80	327	4	3.25	2.25	19	20	18	15	5.4	4.9	5.4	1.8	1.3	1	1.1	1	4.3	3.5	2.8	1.8	1.7	1	1.5	1	3.4	3.4	1	2.3	1	1.6	1.5	1.3	3.6	3.2	1.2	3.1	2	1.1	1.7	1	1.8	6.2	1.5	1.2	1.6
S01	NeutralHumans_fear	38	male	80	327	4	3.25	2.25	19	20	18	15	5.4	4.9	5.4	1.8	1.3	1	1.1	1	4.3	3.5	2.8	1.8	1.7	1	1.5	1	3.4	3.4	1	2.3	1	1.6	1.5	1.3	3.6	3.2	1.2	3.1	2	1.1	1.7	1	1.8	6.2	1.5	1.2	1.6
S01	NeutralHumans_sadness	38	male	80	327	4	3.25	2.25	19	20	18	15	5.4	4.9	5.4	1.8	1.3	1	1.1	1	4.3	3.5	2.8	1.8	1.7	1	1.5	1	3.4	3.4	1	2.3	1	1.6	1.5	1.3	3.6	3.2	1.2	3.1	2	1.1	1.7	1	1.8	6.2	1.5	1.2	1.6
S01	NeutralHumans_valence	38	male	80	327	4	3.25	2.25	19	20	18	15	5.4	4.9	5.4	1.8	1.3	1	1.1	1	4.3	3.5	2.8	1.8	1.7	1	1.5	1	3.4	3.4	1	2.3	1	1.6	1.5	1.3	3.6	3.2	1.2	3.1	2	1.1	1.7	1	1.8	6.2	1.5	1.2	1.6
S01	NeutralHumans_anger	38	male	80	327	4	3.25	2.25	19	20	18	15	5.4	4.9	5.4	1.8	1.3	1	1.1	1	4.3	3.5	2.8	1.8	1.7	1	1.5	1	3.4	3.4	1	2.3	1	1.6	1.5	1.3	3.6	3.2	1.2	3.1	2	1.1	1.7	1	1.8	6.2	1.5	1.2	1.6
S01	NeutralHumans_surprise	38	male	80	327	4	3.25	2.25	19	20	18	15	5.4	4.9	5.4	1.8	1.3	1	1.1	1	4.3	3.5	2.8	1.8	1.7	1	1.5	1	3.4	3.4	1	2.3	1	1.6	1.5	1.3	3.6	3.2	1.2	3.1	2	1.1	1.7	1	1.8	6.2	1.5	1.2	1.6
S01	Object_arousal	38	male	80	327	4	3.25	2.25	19	20	18	15	5.4	4.9	5.4	1.8	1.3	1	1.1	1	4.3	3.5	2.8	1.8	1.7	1	1.5	1	3.4	3.4	1	2.3	1	1.6	1.5	1.3	3.6	3.2	1.2	3.1	2	1.1	1.7	1	1.8	6.2	1.5	1.2	1.6
S01	Object_happiness	38	male	80	327	4	3.25	2.25	19	20	18	15	5.4	4.9	5.4	1.8	1.3	1	1.1	1	4.3	3.5	2.8	1.8	1.7	1	1.5	1	3.4	3.4	1	2.3	1	1.6	1.5	1.3	3.6	3.2	1.2	3.1	2	1.1	1.7	1	1.8	6.2	1.5	1.2	1.6
S01	Object_disgust	38	male	80	327	4	3.25	2.25	19	20	18	15	5.4	4.9	5.4	1.8	1.3	1	1.1	1	4.3	3.5	2.8	1.8	1.7	1	1.5	1	3.4	3.4	1	2.3	1	1.6	1.5	1.3	3.6	3.2	1.2	3.1	2	1.1	1.7	1	1.8	6.2	1.5	1.2	1.6
S01	Object_fear	38	male	80	327	4	3.25	2.25	19	20	18	15	5.4	4.9	5.4	1.8	1.3	1	1.1	1	4.3	3.5	2.8	1.8	1.7	1	1.5	1	3.4	3.4	1	2.3	1	1.6	1.5	1.3	3.6	3.2	1.2	3.1	2	1.1	1.7	1	1.8	6.2	1.5	1.2	1.6
S01	Object_sadness	38	male	80	327	4	3.25	2.25	19	20	18	15	5.4	4.9	5.4	1.8	1.3	1	1.1	1	4.3	3.5	2.8	1.8	1.7	1	1.5	1	3.4	3.4	1	2.3	1	1.6	1.5	1.3	3.6	3.2	1.2	3.1	2	1.1	1.7	1	1.8	6.2	1.5	1.2	1.6
S01	Object_valence	38	male	80	327	4	3.25	2.25	19	20	18	15	5.4	4.9	5.4	1.8	1.3	1	1.1	1	4.3	3.5	2.8	1.8	1.7	1	1.5	1	3.4	3.4	1	2.3	1	1.6	1.5	1.3	3.6	3.2	1.2	3.1	2	1.1	1.7	1	1.8	6.2	1.5	1.2	1.6
S01	Object_anger	38	male	80	327	4	3.25	2.25	19	20	18	15	5.4	4.9	5.4	1.8	1.3	1	1.1	1	4.3	3.5	2.8	1.8	1.7	1	1.5	1	3.4	3.4	1	2.3	1	1.6	1.5	1.3	3.6	3.2	1.2	3.1	2	1.1	1.7	1	1.8	6.2	1.5	1.2	1.6
S01	Object_surprise	38	male	80	327	4	3.25	2.25	19	20	18	15	5.4	4.9	5.4	1.8	1.3	1	1.1	1	4.3	3.5	2.8	1.8	1.7	1	1.5	1	3.4	3.4	1	2.3	1	1.6	1.5	1.3	3.6	3.2	1.2	3.1	2	1.1	1.7	1	1.8	6.2	1.5	1.2	1.6
S01	Pixel_arousal	38	male	80	327	4	3.25	2.25	19	20	18	15	5.4	4.9	5.4	1.8	1.3	1	1.1	1	4.3	3.5	2.8	1.8	1.7	1	1.5	1	3.4	3.4	1	2.3	1	1.6	1.5	1.3	3.6	3.2	1.2	3.1	2	1.1	1.7	1	1.8	6.2	1.5	1.2	1.6
S01	Pixel_happiness	38	male	80	327	4	3.25	2.25	19	20	18	15	5.4	4.9	5.4	1.8	1.3	1	1.1	1	4.3	3.5	2.8	1.8	1.7	1	1.5	1	3.4	3.4	1	2.3	1	1.6	1.5	1.3	3.6	3.2	1.2	3.1	2	1.1	1.7	1	1.8	6.2	1.5	1.2	1.6
S01	Pixel_disgust	38	male	80	327	4	3.25	2.25	19	20	18	15	5.4	4.9	5.4	1.8	1.3	1	1.1	1	4.3	3.5	2.8	1.8	1.7	1	1.5	1	3.4	3.4	1	2.3	1	1.6	1.5	1.3	3.6	3.2	1.2	3.1	2	1.1	1.7	1	1.8	6.2	1.5	1.2	1.6
S01	Pixel_fear	38	male	80	327	4	3.25	2.25	19	20	18	15	5.4	4.9	5.4	1.8	1.3	1	1.1	1	4.3	3.5	2.8	1.8	1.7	1	1.5	1	3.4	3.4	1	2.3	1	1.6	1.5	1.3	3.6	3.2	1.2	3.1	2	1.1	1.7	1	1.8	6.2	1.5	1.2	1.6
S01	Pixel_sadness	38	male	80	327	4	3.25	2.25	19	20	18	15	5.4	4.9	5.4	1.8	1.3	1	1.1	1	4.3	3.5	2.8	1.8	1.7	1	1.5	1	3.4	3.4	1	2.3	1	1.6	1.5	1.3	3.6	3.2	1.2	3.1	2	1.1	1.7	1	1.8	6.2	1.5	1.2	1.6
S01	Pixel_valence	38	male	80	327	4	3.25	2.25	19	20	18	15	5.4	4.9	5.4	1.8	1.3	1	1.1	1	4.3	3.5	2.8	1.8	1.7	1	1.5	1	3.4	3.4	1	2.3	1	1.6	1.5	1.3	3.6	3.2	1.2	3.1	2	1.1	1.7	1	1.8	6.2	1.5	1.2	1.6
S01	Pixel_anger	38	male	80	327	4	3.25	2.25	19	20	18	15	5.4	4.9	5.4	1.8	1.3	1	1.1	1	4.3	3.5	2.8	1.8	1.7	1	1.5	1	3.4	3.4	1	2.3	1	1.6	1.5	1.3	3.6	3.2	1.2	3.1	2	1.1	1.7	1	1.8	6.2	1.5	1.2	1.6
S01	Pixel_surprise	38	male	80	327	4	3.25	2.25	19	20	18	15	5.4	4.9	5.4	1.8	1.3	1	1.1	1	4.3	3.5	2.8	1.8	1.7	1	1.5	1	3.4	3.4	1	2.3	1	1.6	1.5	1.3	3.6	3.2	1.2	3.1	2	1.1	1.7	1	1.8	6.2	1.5	1.2	1.6
S02	ThreateningDogs_arousal	34	female	90	300.5	9	3	4.13	24	25	25	16	5.6	3.5	5.6	1	1.9	1.2	1.2	1.1	5.9	3	3.9	1	1.3	1	1	1	3.8	1.2	1	1.9	1.1	1.4	1.2	1.1	3.8	1.2	1	1.9	1.2	1	1.2	1.1	2.1	5	1	1	1.8
S02	ThreateningDogs_happiness	34	female	90	300.5	9	3	4.13	24	25	25	16	5.6	3.5	5.6	1	1.9	1.2	1.2	1.1	5.9	3	3.9	1	1.3	1	1	1	3.8	1.2	1	1.9	1.1	1.4	1.2	1.1	3.8	1.2	1	1.9	1.2	1	1.2	1.1	2.1	5	1	1	1.8
S02	ThreateningDogs_disgust	34	female	90	300.5	9	3	4.13	24	25	25	16	5.6	3.5	5.6	1	1.9	1.2	1.2	1.1	5.9	3	3.9	1	1.3	1	1	1	3.8	1.2	1	1.9	1.1	1.4	1.2	1.1	3.8	1.2	1	1.9	1.2	1	1.2	1.1	2.1	5	1	1	1.8
S02	ThreateningDogs_fear	34	female	90	300.5	9	3	4.13	24	25	25	16	5.6	3.5	5.6	1	1.9	1.2	1.2	1.1	5.9	3	3.9	1	1.3	1	1	1	3.8	1.2	1	1.9	1.1	1.4	1.2	1.1	3.8	1.2	1	1.9	1.2	1	1.2	1.1	2.1	5	1	1	1.8
S02	ThreateningDogs_sadness	34	female	90	300.5	9	3	4.13	24	25	25	16	5.6	3.5	5.6	1	1.9	1.2	1.2	1.1	5.9	3	3.9	1	1.3	1	1	1	3.8	1.2	1	1.9	1.1	1.4	1.2	1.1	3.8	1.2	1	1.9	1.2	1	1.2	1.1	2.1	5	1	1	1.8
S02	ThreateningDogs_valence	34	female	90	300.5	9	3	4.13	24	25	25	16	5.6	3.5	5.6	1	1.9	1.2	1.2	1.1	5.9	3	3.9	1	1.3	1	1	1	3.8	1.2	1	1.9	1.1	1.4	1.2	1.1	3.8	1.2	1	1.9	1.2	1	1.2	1.1	2.1	5	1	1	1.8
S02	ThreateningDogs_anger	34	female	90	300.5	9	3	4.13	24	25	25	16	5.6	3.5	5.6	1	1.9	1.2	1.2	1.1	5.9	3	3.9	1	1.3	1	1	1	3.8	1.2	1	1.9	1.1	1.4	1.2	1.1	3.8	1.2	1	1.9	1.2	1	1.2	1.1	2.1	5	1	1	1.8
S02	ThreateningDogs_surprise	34	female	90	300.5	9	3	4.13	24	25	25	16	5.6	3.5	5.6	1	1.9	1.2	1.2	1.1	5.9	3	3.9	1	1.3	1	1	1	3.8	1.2	1	1.9	1.1	1.4	1.2	1.1	3.8	1.2	1	1.9	1.2	1	1.2	1.1	2.1	5	1	1	1.8
S02	ThreateningHumans_arousal	34	female	90	300.5	9	3	4.13	24	25	25	16	5.6	3.5	5.6	1	1.9	1.2	1.2	1.1	5.9	3	3.9	1	1.3	1	1	1	3.8	1.2	1	1.9	1.1	1.4	1.2	1.1	3.8	1.2	1	1.9	1.2	1	1.2	1.1	2.1	5	1	1	1.8
S02	ThreateningHumans_happiness	34	female	90	300.5	9	3	4.13	24	25	25	16	5.6	3.5	5.6	1	1.9	1.2	1.2	1.1	5.9	3	3.9	1	1.3	1	1	1	3.8	1.2	1	1.9	1.1	1.4	1.2	1.1	3.8	1.2	1	1.9	1.2	1	1.2	1.1	2.1	5	1	1	1.8
S02	ThreateningHumans_disgust	34	female	90	300.5	9	3	4.13	24	25	25	16	5.6	3.5	5.6	1	1.9	1.2	1.2	1.1	5.9	3	3.9	1	1.3	1	1	1	3.8	1.2	1	1.9	1.1	1.4	1.2	1.1	3.8	1.2	1	1.9	1.2	1	1.2	1.1	2.1	5	1	1	1.8
S02	ThreateningHumans_fear	34	female	90	300.5	9	3	4.13	24	25	25	16	5.6	3.5	5.6	1	1.9	1.2	1.2	1.1	5.9	3	3.9	1	1.3	1	1	1	3.8	1.2	1	1.9	1.1	1.4	1.2	1.1	3.8	1.2	1	1.9	1.2	1	1.2	1.1	2.1	5	1	1	1.8
S02	ThreateningHumans_sadness	34	female	90	300.5	9	3	4.13	24	25	25	16	5.6	3.5	5.6	1	1.9	1.2	1.2	1.1	5.9	3	3.9	1	1.3	1	1	1	3.8	1.2	1	1.9	1.1	1.4	1.2	1.1	3.8	1.2	1	1.9	1.2	1	1.2	1.1	2.1	5	1	1	1.8
S02	ThreateningHumans_valence	34	female	90	300.5	9	3	4.13	24	25	25	16	5.6	3.5	5.6	1	1.9	1.2	1.2	1.1	5.9	3	3.9	1	1.3	1	1	1	3.8	1.2	1	1.9	1.1	1.4	1.2	1.1	3.8	1.2	1	1.9	1.2	1	1.2	1.1	2.1	5	1	1	1.8
S02	ThreateningHumans_anger	34	female	90	300.5	9	3	4.13	24	25	25	16	5.6	3.5	5.6	1	1.9	1.2	1.2	1.1	5.9	3	3.9	1	1.3	1	1	1	3.8	1.2	1	1.9	1.1	1.4	1.2	1.1	3.8	1.2	1	1.9	1.2	1	1.2	1.1	2.1	5	1	1	1.8
S02	ThreateningHumans_surprise	34	female	90	300.5	9	3	4.13	24	25	25	16	5.6	3.5	5.6	1	1.9	1.2	1.2	1.1	5.9	3	3.9	1	1.3	1	1	1	3.8	1.2	1	1.9	1.1	1.4	1.2	1.1	3.8	1.2	1	1.9	1.2	1	1.2	1.1	2.1	5	1	1	1.8
S02	PleasantDogs_arousal	34	female	90	300.5	9	3	4.13	24	25	25	16	5.6	3.5	5.6	1	1.9	1.2	1.2	1.1	5.9	3	3.9	1	1.3	1	1	1	3.8	1.2	1	1.9	1.1	1.4	1.2	1.1	3.8	1.2	1	1.9	1.2	1	1.2	1.1	2.1	5	1	1	1.8
S02	PleasantDogs_happiness	34	female	90	300.5	9	3	4.13	24	25	25	16	5.6	3.5	5.6	1	1.9	1.2	1.2	1.1	5.9	3	3.9	1	1.3	1	1	1	3.8	1.2	1	1.9	1.1	1.4	1.2	1.1	3.8	1.2	1	1.9	1.2	1	1.2	1.1	2.1	5	1	1	1.8
S02	PleasantDogs_disgust	34	female	90	300.5	9	3	4.13	24	25	25	16	5.6	3.5	5.6	1	1.9	1.2	1.2	1.1	5.9	3	3.9	1	1.3	1	1	1	3.8	1.2	1	1.9	1.1	1.4	1.2	1.1	3.8	1.2	1	1.9	1.2	1	1.2	1.1	2.1	5	1	1	1.8
S02	PleasantDogs_fear	34	female	90	300.5	9	3	4.13	24	25	25	16	5.6	3.5	5.6	1	1.9	1.2	1.2	1.1	5.9	3	3.9	1	1.3	1	1	1	3.8	1.2	1	1.9	1.1	1.4	1.2	1.1	3.8	1.2	1	1.9	1.2	1	1.2	1.1	2.1	5	1	1	1.8
S02	PleasantDogs_sadness	34	female	90	300.5	9	3	4.13	24	25	25	16	5.6	3.5	5.6	1	1.9	1.2	1.2	1.1	5.9	3	3.9	1	1.3	1	1	1	3.8	1.2	1	1.9	1.1	1.4	1.2	1.1	3.8	1.2	1	1.9	1.2	1	1.2	1.1	2.1	5	1	1	1.8
S02	PleasantDogs_valence	34	female	90	300.5	9	3	4.13	24	25	25	16	5.6	3.5	5.6	1	1.9	1.2	1.2	1.1	5.9	3	3.9	1	1.3	1	1	1	3.8	1.2	1	1.9	1.1	1.4	1.2	1.1	3.8	1.2	1	1.9	1.2	1	1.2	1.1	2.1	5	1	1	1.8
S02	PleasantDogs_anger	34	female	90	300.5	9	3	4.13	24	25	25	16	5.6	3.5	5.6	1	1.9	1.2	1.2	1.1	5.9	3	3.9	1	1.3	1	1	1	3.8	1.2	1	1.9	1.1	1.4	1.2	1.1	3.8	1.2	1	1.9	1.2	1	1.2	1.1	2.1	5	1	1	1.8
S02	PleasantDogs_surprise	34	female	90	300.5	9	3	4.13	24	25	25	16	5.6	3.5	5.6	1	1.9	1.2	1.2	1.1	5.9	3	3.9	1	1.3	1	1	1	3.8	1.2	1	1.9	1.1	1.4	1.2	1.1	3.8	1.2	1	1.9	1.2	1	1.2	1.1	2.1	5	1	1	1.8
S02	PleasantHumans_arousal	34	female	90	300.5	9	3	4.13	24	25	25	16	5.6	3.5	5.6	1	1.9	1.2	1.2	1.1	5.9	3	3.9	1	1.3	1	1	1	3.8	1.2	1	1.9	1.1	1.4	1.2	1.1	3.8	1.2	1	1.9	1.2	1	1.2	1.1	2.1	5	1	1	1.8
S02	PleasantHumans_happiness	34	female	90	300.5	9	3	4.13	24	25	25	16	5.6	3.5	5.6	1	1.9	1.2	1.2	1.1	5.9	3	3.9	1	1.3	1	1	1	3.8	1.2	1	1.9	1.1	1.4	1.2	1.1	3.8	1.2	1	1.9	1.2	1	1.2	1.1	2.1	5	1	1	1.8
S02	PleasantHumans_disgust	34	female	90	300.5	9	3	4.13	24	25	25	16	5.6	3.5	5.6	1	1.9	1.2	1.2	1.1	5.9	3	3.9	1	1.3	1	1	1	3.8	1.2	1	1.9	1.1	1.4	1.2	1.1	3.8	1.2	1	1.9	1.2	1	1.2	1.1	2.1	5	1	1	1.8
S02	PleasantHumans_fear	34	female	90	300.5	9	3	4.13	24	25	25	16	5.6	3.5	5.6	1	1.9	1.2	1.2	1.1	5.9	3	3.9	1	1.3	1	1	1	3.8	1.2	1	1.9	1.1	1.4	1.2	1.1	3.8	1.2	1	1.9	1.2	1	1.2	1.1	2.1	5	1	1	1.8
S02	PleasantHumans_sadness	34	female	90	300.5	9	3	4.13	24	25	25	16	5.6	3.5	5.6	1	1.9	1.2	1.2	1.1	5.9	3	3.9	1	1.3	1	1	1	3.8	1.2	1	1.9	1.1	1.4	1.2	1.1	3.8	1.2	1	1.9	1.2	1	1.2	1.1	2.1	5	1	1	1.8
S02	PleasantHumans_valence	34	female	90	300.5	9	3	4.13	24	25	25	16	5.6	3.5	5.6	1	1.9	1.2	1.2	1.1	5.9	3	3.9	1	1.3	1	1	1	3.8	1.2	1	1.9	1.1	1.4	1.2	1.1	3.8	1.2	1	1.9	1.2	1	1.2	1.1	2.1	5	1	1	1.8
S02	PleasantHumans_anger	34	female	90	300.5	9	3	4.13	24	25	25	16	5.6	3.5	5.6	1	1.9	1.2	1.2	1.1	5.9	3	3.9	1	1.3	1	1	1	3.8	1.2	1	1.9	1.1	1.4	1.2	1.1	3.8	1.2	1	1.9	1.2	1	1.2	1.1	2.1	5	1	1	1.8
S02	PleasantHumans_surprise	34	female	90	300.5	9	3	4.13	24	25	25	16	5.6	3.5	5.6	1	1.9	1.2	1.2	1.1	5.9	3	3.9	1	1.3	1	1	1	3.8	1.2	1	1.9	1.1	1.4	1.2	1.1	3.8	1.2	1	1.9	1.2	1	1.2	1.1	2.1	5	1	1	1.8
S02	NeutralDogs_arousal	34	female	90	300.5	9	3	4.13	24	25	25	16	5.6	3.5	5.6	1	1.9	1.2	1.2	1.1	5.9	3	3.9	1	1.3	1	1	1	3.8	1.2	1	1.9	1.1	1.4	1.2	1.1	3.8	1.2	1	1.9	1.2	1	1.2	1.1	2.1	5	1	1	1.8
S02	NeutralDogs_happiness	34	female	90	300.5	9	3	4.13	24	25	25	16	5.6	3.5	5.6	1	1.9	1.2	1.2	1.1	5.9	3	3.9	1	1.3	1	1	1	3.8	1.2	1	1.9	1.1	1.4	1.2	1.1	3.8	1.2	1	1.9	1.2	1	1.2	1.1	2.1	5	1	1	1.8
S02	NeutralDogs_disgust	34	female	90	300.5	9	3	4.13	24	25	25	16	5.6	3.5	5.6	1	1.9	1.2	1.2	1.1	5.9	3	3.9	1	1.3	1	1	1	3.8	1.2	1	1.9	1.1	1.4	1.2	1.1	3.8	1.2	1	1.9	1.2	1	1.2	1.1	2.1	5	1	1	1.8
S02	NeutralDogs_fear	34	female	90	300.5	9	3	4.13	24	25	25	16	5.6	3.5	5.6	1	1.9	1.2	1.2	1.1	5.9	3	3.9	1	1.3	1	1	1	3.8	1.2	1	1.9	1.1	1.4	1.2	1.1	3.8	1.2	1	1.9	1.2	1	1.2	1.1	2.1	5	1	1	1.8
S02	NeutralDogs_sadness	34	female	90	300.5	9	3	4.13	24	25	25	16	5.6	3.5	5.6	1	1.9	1.2	1.2	1.1	5.9	3	3.9	1	1.3	1	1	1	3.8	1.2	1	1.9	1.1	1.4	1.2	1.1	3.8	1.2	1	1.9	1.2	1	1.2	1.1	2.1	5	1	1	1.8
S02	NeutralDogs_valence	34	female	90	300.5	9	3	4.13	24	25	25	16	5.6	3.5	5.6	1	1.9	1.2	1.2	1.1	5.9	3	3.9	1	1.3	1	1	1	3.8	1.2	1	1.9	1.1	1.4	1.2	1.1	3.8	1.2	1	1.9	1.2	1	1.2	1.1	2.1	5	1	1	1.8
S02	NeutralDogs_anger	34	female	90	300.5	9	3	4.13	24	25	25	16	5.6	3.5	5.6	1	1.9	1.2	1.2	1.1	5.9	3	3.9	1	1.3	1	1	1	3.8	1.2	1	1.9	1.1	1.4	1.2	1.1	3.8	1.2	1	1.9	1.2	1	1.2	1.1	2.1	5	1	1	1.8
S02	NeutralDogs_surprise	34	female	90	300.5	9	3	4.13	24	25	25	16	5.6	3.5	5.6	1	1.9	1.2	1.2	1.1	5.9	3	3.9	1	1.3	1	1	1	3.8	1.2	1	1.9	1.1	1.4	1.2	1.1	3.8	1.2	1	1.9	1.2	1	1.2	1.1	2.1	5	1	1	1.8
S02	NeutralHumans_arousal	34	female	90	300.5	9	3	4.13	24	25	25	16	5.6	3.5	5.6	1	1.9	1.2	1.2	1.1	5.9	3	3.9	1	1.3	1	1	1	3.8	1.2	1	1.9	1.1	1.4	1.2	1.1	3.8	1.2	1	1.9	1.2	1	1.2	1.1	2.1	5	1	1	1.8
S02	NeutralHumans_happiness	34	female	90	300.5	9	3	4.13	24	25	25	16	5.6	3.5	5.6	1	1.9	1.2	1.2	1.1	5.9	3	3.9	1	1.3	1	1	1	3.8	1.2	1	1.9	1.1	1.4	1.2	1.1	3.8	1.2	1	1.9	1.2	1	1.2	1.1	2.1	5	1	1	1.8
S02	NeutralHumans_disgust	34	female	90	300.5	9	3	4.13	24	25	25	16	5.6	3.5	5.6	1	1.9	1.2	1.2	1.1	5.9	3	3.9	1	1.3	1	1	1	3.8	1.2	1	1.9	1.1	1.4	1.2	1.1	3.8	1.2	1	1.9	1.2	1	1.2	1.1	2.1	5	1	1	1.8
S02	NeutralHumans_fear	34	female	90	300.5	9	3	4.13	24	25	25	16	5.6	3.5	5.6	1	1.9	1.2	1.2	1.1	5.9	3	3.9	1	1.3	1	1	1	3.8	1.2	1	1.9	1.1	1.4	1.2	1.1	3.8	1.2	1	1.9	1.2	1	1.2	1.1	2.1	5	1	1	1.8
S02	NeutralHumans_sadness	34	female	90	300.5	9	3	4.13	24	25	25	16	5.6	3.5	5.6	1	1.9	1.2	1.2	1.1	5.9	3	3.9	1	1.3	1	1	1	3.8	1.2	1	1.9	1.1	1.4	1.2	1.1	3.8	1.2	1	1.9	1.2	1	1.2	1.1	2.1	5	1	1	1.8
S02	NeutralHumans_valence	34	female	90	300.5	9	3	4.13	24	25	25	16	5.6	3.5	5.6	1	1.9	1.2	1.2	1.1	5.9	3	3.9	1	1.3	1	1	1	3.8	1.2	1	1.9	1.1	1.4	1.2	1.1	3.8	1.2	1	1.9	1.2	1	1.2	1.1	2.1	5	1	1	1.8
S02	NeutralHumans_anger	34	female	90	300.5	9	3	4.13	24	25	25	16	5.6	3.5	5.6	1	1.9	1.2	1.2	1.1	5.9	3	3.9	1	1.3	1	1	1	3.8	1.2	1	1.9	1.1	1.4	1.2	1.1	3.8	1.2	1	1.9	1.2	1	1.2	1.1	2.1	5	1	1	1.8
S02	NeutralHumans_surprise	34	female	90	300.5	9	3	4.13	24	25	25	16	5.6	3.5	5.6	1	1.9	1.2	1.2	1.1	5.9	3	3.9	1	1.3	1	1	1	3.8	1.2	1	1.9	1.1	1.4	1.2	1.1	3.8	1.2	1	1.9	1.2	1	1.2	1.1	2.1	5	1	1	1.8
S02	Object_arousal	34	female	90	300.5	9	3	4.13	24	25	25	16	5.6	3.5	5.6	1	1.9	1.2	1.2	1.1	5.9	3	3.9	1	1.3	1	1	1	3.8	1.2	1	1.9	1.1	1.4	1.2	1.1	3.8	1.2	1	1.9	1.2	1	1.2	1.1	2.1	5	1	1	1.8
S02	Object_happiness	34	female	90	300.5	9	3	4.13	24	25	25	16	5.6	3.5	5.6	1	1.9	1.2	1.2	1.1	5.9	3	3.9	1	1.3	1	1	1	3.8	1.2	1	1.9	1.1	1.4	1.2	1.1	3.8	1.2	1	1.9	1.2	1	1.2	1.1	2.1	5	1	1	1.8
S02	Object_disgust	34	female	90	300.5	9	3	4.13	24	25	25	16	5.6	3.5	5.6	1	1.9	1.2	1.2	1.1	5.9	3	3.9	1	1.3	1	1	1	3.8	1.2	1	1.9	1.1	1.4	1.2	1.1	3.8	1.2	1	1.9	1.2	1	1.2	1.1	2.1	5	1	1	1.8
S02	Object_fear	34	female	90	300.5	9	3	4.13	24	25	25	16	5.6	3.5	5.6	1	1.9	1.2	1.2	1.1	5.9	3	3.9	1	1.3	1	1	1	3.8	1.2	1	1.9	1.1	1.4	1.2	1.1	3.8	1.2	1	1.9	1.2	1	1.2	1.1	2.1	5	1	1	1.8
S02	Object_sadness	34	female	90	300.5	9	3	4.13	24	25	25	16	5.6	3.5	5.6	1	1.9	1.2	1.2	1.1	5.9	3	3.9	1	1.3	1	1	1	3.8	1.2	1	1.9	1.1	1.4	1.2	1.1	3.8	1.2	1	1.9	1.2	1	1.2	1.1	2.1	5	1	1	1.8
S02	Object_valence	34	female	90	300.5	9	3	4.13	24	25	25	16	5.6	3.5	5.6	1	1.9	1.2	1.2	1.1	5.9	3	3.9	1	1.3	1	1	1	3.8	1.2	1	1.9	1.1	1.4	1.2	1.1	3.8	1.2	1	1.9	1.2	1	1.2	1.1	2.1	5	1	1	1.8
S02	Object_anger	34	female	90	300.5	9	3	4.13	24	25	25	16	5.6	3.5	5.6	1	1.9	1.2	1.2	1.1	5.9	3	3.9	1	1.3	1	1	1	3.8	1.2	1	1.9	1.1	1.4	1.2	1.1	3.8	1.2	1	1.9	1.2	1	1.2	1.1	2.1	5	1	1	1.8
S02	Object_surprise	34	female	90	300.5	9	3	4.13	24	25	25	16	5.6	3.5	5.6	1	1.9	1.2	1.2	1.1	5.9	3	3.9	1	1.3	1	1	1	3.8	1.2	1	1.9	1.1	1.4	1.2	1.1	3.8	1.2	1	1.9	1.2	1	1.2	1.1	2.1	5	1	1	1.8
S02	Pixel_arousal	34	female	90	300.5	9	3	4.13	24	25	25	16	5.6	3.5	5.6	1	1.9	1.2	1.2	1.1	5.9	3	3.9	1	1.3	1	1	1	3.8	1.2	1	1.9	1.1	1.4	1.2	1.1	3.8	1.2	1	1.9	1.2	1	1.2	1.1	2.1	5	1	1	1.8
S02	Pixel_happiness	34	female	90	300.5	9	3	4.13	24	25	25	16	5.6	3.5	5.6	1	1.9	1.2	1.2	1.1	5.9	3	3.9	1	1.3	1	1	1	3.8	1.2	1	1.9	1.1	1.4	1.2	1.1	3.8	1.2	1	1.9	1.2	1	1.2	1.1	2.1	5	1	1	1.8
S02	Pixel_disgust	34	female	90	300.5	9	3	4.13	24	25	25	16	5.6	3.5	5.6	1	1.9	1.2	1.2	1.1	5.9	3	3.9	1	1.3	1	1	1	3.8	1.2	1	1.9	1.1	1.4	1.2	1.1	3.8	1.2	1	1.9	1.2	1	1.2	1.1	2.1	5	1	1	1.8
S02	Pixel_fear	34	female	90	300.5	9	3	4.13	24	25	25	16	5.6	3.5	5.6	1	1.9	1.2	1.2	1.1	5.9	3	3.9	1	1.3	1	1	1	3.8	1.2	1	1.9	1.1	1.4	1.2	1.1	3.8	1.2	1	1.9	1.2	1	1.2	1.1	2.1	5	1	1	1.8
S02	Pixel_sadness	34	female	90	300.5	9	3	4.13	24	25	25	16	5.6	3.5	5.6	1	1.9	1.2	1.2	1.1	5.9	3	3.9	1	1.3	1	1	1	3.8	1.2	1	1.9	1.1	1.4	1.2	1.1	3.8	1.2	1	1.9	1.2	1	1.2	1.1	2.1	5	1	1	1.8
S02	Pixel_valence	34	female	90	300.5	9	3	4.13	24	25	25	16	5.6	3.5	5.6	1	1.9	1.2	1.2	1.1	5.9	3	3.9	1	1.3	1	1	1	3.8	1.2	1	1.9	1.1	1.4	1.2	1.1	3.8	1.2	1	1.9	1.2	1	1.2	1.1	2.1	5	1	1	1.8
S02	Pixel_anger	34	female	90	300.5	9	3	4.13	24	25	25	16	5.6	3.5	5.6	1	1.9	1.2	1.2	1.1	5.9	3	3.9	1	1.3	1	1	1	3.8	1.2	1	1.9	1.1	1.4	1.2	1.1	3.8	1.2	1	1.9	1.2	1	1.2	1.1	2.1	5	1	1	1.8
S02	Pixel_surprise	34	female	90	300.5	9	3	4.13	24	25	25	16	5.6	3.5	5.6	1	1.9	1.2	1.2	1.1	5.9	3	3.9	1	1.3	1	1	1	3.8	1.2	1	1.9	1.1	1.4	1.2	1.1	3.8	1.2	1	1.9	1.2	1	1.2	1.1	2.1	5	1	1	1.8
S03	ThreateningDogs_arousal	33	female	100	264.5	9	2.63	2.75	17	20	26	15	5.1	3.2	4.5	1.1	1.8	1	1	1	4.6	1.9	2.7	1.1	1.5	1	1	1	3.7	1.4	1.3	2	1.3	1	1.1	1	3.8	1.3	1.3	2	1.1	1	1.1	1	2.3	4.2	1	1.2	1.4
S03	ThreateningDogs_happiness	33	female	100	264.5	9	2.63	2.75	17	20	26	15	5.1	3.2	4.5	1.1	1.8	1	1	1	4.6	1.9	2.7	1.1	1.5	1	1	1	3.7	1.4	1.3	2	1.3	1	1.1	1	3.8	1.3	1.3	2	1.1	1	1.1	1	2.3	4.2	1	1.2	1.4
S03	ThreateningDogs_disgust	33	female	100	264.5	9	2.63	2.75	17	20	26	15	5.1	3.2	4.5	1.1	1.8	1	1	1	4.6	1.9	2.7	1.1	1.5	1	1	1	3.7	1.4	1.3	2	1.3	1	1.1	1	3.8	1.3	1.3	2	1.1	1	1.1	1	2.3	4.2	1	1.2	1.4
S03	ThreateningDogs_fear	33	female	100	264.5	9	2.63	2.75	17	20	26	15	5.1	3.2	4.5	1.1	1.8	1	1	1	4.6	1.9	2.7	1.1	1.5	1	1	1	3.7	1.4	1.3	2	1.3	1	1.1	1	3.8	1.3	1.3	2	1.1	1	1.1	1	2.3	4.2	1	1.2	1.4
S03	ThreateningDogs_sadness	33	female	100	264.5	9	2.63	2.75	17	20	26	15	5.1	3.2	4.5	1.1	1.8	1	1	1	4.6	1.9	2.7	1.1	1.5	1	1	1	3.7	1.4	1.3	2	1.3	1	1.1	1	3.8	1.3	1.3	2	1.1	1	1.1	1	2.3	4.2	1	1.2	1.4
S03	ThreateningDogs_valence	33	female	100	264.5	9	2.63	2.75	17	20	26	15	5.1	3.2	4.5	1.1	1.8	1	1	1	4.6	1.9	2.7	1.1	1.5	1	1	1	3.7	1.4	1.3	2	1.3	1	1.1	1	3.8	1.3	1.3	2	1.1	1	1.1	1	2.3	4.2	1	1.2	1.4
S03	ThreateningDogs_anger	33	female	100	264.5	9	2.63	2.75	17	20	26	15	5.1	3.2	4.5	1.1	1.8	1	1	1	4.6	1.9	2.7	1.1	1.5	1	1	1	3.7	1.4	1.3	2	1.3	1	1.1	1	3.8	1.3	1.3	2	1.1	1	1.1	1	2.3	4.2	1	1.2	1.4
S03	ThreateningDogs_surprise	33	female	100	264.5	9	2.63	2.75	17	20	26	15	5.1	3.2	4.5	1.1	1.8	1	1	1	4.6	1.9	2.7	1.1	1.5	1	1	1	3.7	1.4	1.3	2	1.3	1	1.1	1	3.8	1.3	1.3	2	1.1	1	1.1	1	2.3	4.2	1	1.2	1.4
S03	ThreateningHumans_arousal	33	female	100	264.5	9	2.63	2.75	17	20	26	15	5.1	3.2	4.5	1.1	1.8	1	1	1	4.6	1.9	2.7	1.1	1.5	1	1	1	3.7	1.4	1.3	2	1.3	1	1.1	1	3.8	1.3	1.3	2	1.1	1	1.1	1	2.3	4.2	1	1.2	1.4
S03	ThreateningHumans_happiness	33	female	100	264.5	9	2.63	2.75	17	20	26	15	5.1	3.2	4.5	1.1	1.8	1	1	1	4.6	1.9	2.7	1.1	1.5	1	1	1	3.7	1.4	1.3	2	1.3	1	1.1	1	3.8	1.3	1.3	2	1.1	1	1.1	1	2.3	4.2	1	1.2	1.4
S03	ThreateningHumans_disgust	33	female	100	264.5	9	2.63	2.75	17	20	26	15	5.1	3.2	4.5	1.1	1.8	1	1	1	4.6	1.9	2.7	1.1	1.5	1	1	1	3.7	1.4	1.3	2	1.3	1	1.1	1	3.8	1.3	1.3	2	1.1	1	1.1	1	2.3	4.2	1	1.2	1.4
S03	ThreateningHumans_fear	33	female	100	264.5	9	2.63	2.75	17	20	26	15	5.1	3.2	4.5	1.1	1.8	1	1	1	4.6	1.9	2.7	1.1	1.5	1	1	1	3.7	1.4	1.3	2	1.3	1	1.1	1	3.8	1.3	1.3	2	1.1	1	1.1	1	2.3	4.2	1	1.2	1.4
S03	ThreateningHumans_sadness	33	female	100	264.5	9	2.63	2.75	17	20	26	15	5.1	3.2	4.5	1.1	1.8	1	1	1	4.6	1.9	2.7	1.1	1.5	1	1	1	3.7	1.4	1.3	2	1.3	1	1.1	1	3.8	1.3	1.3	2	1.1	1	1.1	1	2.3	4.2	1	1.2	1.4
S03	ThreateningHumans_valence	33	female	100	264.5	9	2.63	2.75	17	20	26	15	5.1	3.2	4.5	1.1	1.8	1	1	1	4.6	1.9	2.7	1.1	1.5	1	1	1	3.7	1.4	1.3	2	1.3	1	1.1	1	3.8	1.3	1.3	2	1.1	1	1.1	1	2.3	4.2	1	1.2	1.4
S03	ThreateningHumans_anger	33	female	100	264.5	9	2.63	2.75	17	20	26	15	5.1	3.2	4.5	1.1	1.8	1	1	1	4.6	1.9	2.7	1.1	1.5	1	1	1	3.7	1.4	1.3	2	1.3	1	1.1	1	3.8	1.3	1.3	2	1.1	1	1.1	1	2.3	4.2	1	1.2	1.4
S03	ThreateningHumans_surprise	33	female	100	264.5	9	2.63	2.75	17	20	26	15	5.1	3.2	4.5	1.1	1.8	1	1	1	4.6	1.9	2.7	1.1	1.5	1	1	1	3.7	1.4	1.3	2	1.3	1	1.1	1	3.8	1.3	1.3	2	1.1	1	1.1	1	2.3	4.2	1	1.2	1.4
S03	PleasantDogs_arousal	33	female	100	264.5	9	2.63	2.75	17	20	26	15	5.1	3.2	4.5	1.1	1.8	1	1	1	4.6	1.9	2.7	1.1	1.5	1	1	1	3.7	1.4	1.3	2	1.3	1	1.1	1	3.8	1.3	1.3	2	1.1	1	1.1	1	2.3	4.2	1	1.2	1.4
S03	PleasantDogs_happiness	33	female	100	264.5	9	2.63	2.75	17	20	26	15	5.1	3.2	4.5	1.1	1.8	1	1	1	4.6	1.9	2.7	1.1	1.5	1	1	1	3.7	1.4	1.3	2	1.3	1	1.1	1	3.8	1.3	1.3	2	1.1	1	1.1	1	2.3	4.2	1	1.2	1.4
S03	PleasantDogs_disgust	33	female	100	264.5	9	2.63	2.75	17	20	26	15	5.1	3.2	4.5	1.1	1.8	1	1	1	4.6	1.9	2.7	1.1	1.5	1	1	1	3.7	1.4	1.3	2	1.3	1	1.1	1	3.8	1.3	1.3	2	1.1	1	1.1	1	2.3	4.2	1	1.2	1.4
S03	PleasantDogs_fear	33	female	100	264.5	9	2.63	2.75	17	20	26	15	5.1	3.2	4.5	1.1	1.8	1	1	1	4.6	1.9	2.7	1.1	1.5	1	1	1	3.7	1.4	1.3	2	1.3	1	1.1	1	3.8	1.3	1.3	2	1.1	1	1.1	1	2.3	4.2	1	1.2	1.4
S03	PleasantDogs_sadness	33	female	100	264.5	9	2.63	2.75	17	20	26	15	5.1	3.2	4.5	1.1	1.8	1	1	1	4.6	1.9	2.7	1.1	1.5	1	1	1	3.7	1.4	1.3	2	1.3	1	1.1	1	3.8	1.3	1.3	2	1.1	1	1.1	1	2.3	4.2	1	1.2	1.4
S03	PleasantDogs_valence	33	female	100	264.5	9	2.63	2.75	17	20	26	15	5.1	3.2	4.5	1.1	1.8	1	1	1	4.6	1.9	2.7	1.1	1.5	1	1	1	3.7	1.4	1.3	2	1.3	1	1.1	1	3.8	1.3	1.3	2	1.1	1	1.1	1	2.3	4.2	1	1.2	1.4
S03	PleasantDogs_anger	33	female	100	264.5	9	2.63	2.75	17	20	26	15	5.1	3.2	4.5	1.1	1.8	1	1	1	4.6	1.9	2.7	1.1	1.5	1	1	1	3.7	1.4	1.3	2	1.3	1	1.1	1	3.8	1.3	1.3	2	1.1	1	1.1	1	2.3	4.2	1	1.2	1.4
S03	PleasantDogs_surprise	33	female	100	264.5	9	2.63	2.75	17	20	26	15	5.1	3.2	4.5	1.1	1.8	1	1	1	4.6	1.9	2.7	1.1	1.5	1	1	1	3.7	1.4	1.3	2	1.3	1	1.1	1	3.8	1.3	1.3	2	1.1	1	1.1	1	2.3	4.2	1	1.2	1.4
S03	PleasantHumans_arousal	33	female	100	264.5	9	2.63	2.75	17	20	26	15	5.1	3.2	4.5	1.1	1.8	1	1	1	4.6	1.9	2.7	1.1	1.5	1	1	1	3.7	1.4	1.3	2	1.3	1	1.1	1	3.8	1.3	1.3	2	1.1	1	1.1	1	2.3	4.2	1	1.2	1.4
S03	PleasantHumans_happiness	33	female	100	264.5	9	2.63	2.75	17	20	26	15	5.1	3.2	4.5	1.1	1.8	1	1	1	4.6	1.9	2.7	1.1	1.5	1	1	1	3.7	1.4	1.3	2	1.3	1	1.1	1	3.8	1.3	1.3	2	1.1	1	1.1	1	2.3	4.2	1	1.2	1.4
S03	PleasantHumans_disgust	33	female	100	264.5	9	2.63	2.75	17	20	26	15	5.1	3.2	4.5	1.1	1.8	1	1	1	4.6	1.9	2.7	1.1	1.5	1	1	1	3.7	1.4	1.3	2	1.3	1	1.1	1	3.8	1.3	1.3	2	1.1	1	1.1	1	2.3	4.2	1	1.2	1.4
S03	PleasantHumans_fear	33	female	100	264.5	9	2.63	2.75	17	20	26	15	5.1	3.2	4.5	1.1	1.8	1	1	1	4.6	1.9	2.7	1.1	1.5	1	1	1	3.7	1.4	1.3	2	1.3	1	1.1	1	3.8	1.3	1.3	2	1.1	1	1.1	1	2.3	4.2	1	1.2	1.4
S03	PleasantHumans_sadness	33	female	100	264.5	9	2.63	2.75	17	20	26	15	5.1	3.2	4.5	1.1	1.8	1	1	1	4.6	1.9	2.7	1.1	1.5	1	1	1	3.7	1.4	1.3	2	1.3	1	1.1	1	3.8	1.3	1.3	2	1.1	1	1.1	1	2.3	4.2	1	1.2	1.4
S03	PleasantHumans_valence	33	female	100	264.5	9	2.63	2.75	17	20	26	15	5.1	3.2	4.5	1.1	1.8	1	1	1	4.6	1.9	2.7	1.1	1.5	1	1	1	3.7	1.4	1.3	2	1.3	1	1.1	1	3.8	1.3	1.3	2	1.1	1	1.1	1	2.3	4.2	1	1.2	1.4
S03	PleasantHumans_anger	33	female	100	264.5	9	2.63	2.75	17	20	26	15	5.1	3.2	4.5	1.1	1.8	1	1	1	4.6	1.9	2.7	1.1	1.5	1	1	1	3.7	1.4	1.3	2	1.3	1	1.1	1	3.8	1.3	1.3	2	1.1	1	1.1	1	2.3	4.2	1	1.2	1.4
S03	PleasantHumans_surprise	33	female	100	264.5	9	2.63	2.75	17	20	26	15	5.1	3.2	4.5	1.1	1.8	1	1	1	4.6	1.9	2.7	1.1	1.5	1	1	1	3.7	1.4	1.3	2	1.3	1	1.1	1	3.8	1.3	1.3	2	1.1	1	1.1	1	2.3	4.2	1	1.2	1.4
S03	NeutralDogs_arousal	33	female	100	264.5	9	2.63	2.75	17	20	26	15	5.1	3.2	4.5	1.1	1.8	1	1	1	4.6	1.9	2.7	1.1	1.5	1	1	1	3.7	1.4	1.3	2	1.3	1	1.1	1	3.8	1.3	1.3	2	1.1	1	1.1	1	2.3	4.2	1	1.2	1.4
S03	NeutralDogs_happiness	33	female	100	264.5	9	2.63	2.75	17	20	26	15	5.1	3.2	4.5	1.1	1.8	1	1	1	4.6	1.9	2.7	1.1	1.5	1	1	1	3.7	1.4	1.3	2	1.3	1	1.1	1	3.8	1.3	1.3	2	1.1	1	1.1	1	2.3	4.2	1	1.2	1.4
S03	NeutralDogs_disgust	33	female	100	264.5	9	2.63	2.75	17	20	26	15	5.1	3.2	4.5	1.1	1.8	1	1	1	4.6	1.9	2.7	1.1	1.5	1	1	1	3.7	1.4	1.3	2	1.3	1	1.1	1	3.8	1.3	1.3	2	1.1	1	1.1	1	2.3	4.2	1	1.2	1.4
S03	NeutralDogs_fear	33	female	100	264.5	9	2.63	2.75	17	20	26	15	5.1	3.2	4.5	1.1	1.8	1	1	1	4.6	1.9	2.7	1.1	1.5	1	1	1	3.7	1.4	1.3	2	1.3	1	1.1	1	3.8	1.3	1.3	2	1.1	1	1.1	1	2.3	4.2	1	1.2	1.4
S03	NeutralDogs_sadness	33	female	100	264.5	9	2.63	2.75	17	20	26	15	5.1	3.2	4.5	1.1	1.8	1	1	1	4.6	1.9	2.7	1.1	1.5	1	1	1	3.7	1.4	1.3	2	1.3	1	1.1	1	3.8	1.3	1.3	2	1.1	1	1.1	1	2.3	4.2	1	1.2	1.4
S03	NeutralDogs_valence	33	female	100	264.5	9	2.63	2.75	17	20	26	15	5.1	3.2	4.5	1.1	1.8	1	1	1	4.6	1.9	2.7	1.1	1.5	1	1	1	3.7	1.4	1.3	2	1.3	1	1.1	1	3.8	1.3	1.3	2	1.1	1	1.1	1	2.3	4.2	1	1.2	1.4
S03	NeutralDogs_anger	33	female	100	264.5	9	2.63	2.75	17	20	26	15	5.1	3.2	4.5	1.1	1.8	1	1	1	4.6	1.9	2.7	1.1	1.5	1	1	1	3.7	1.4	1.3	2	1.3	1	1.1	1	3.8	1.3	1.3	2	1.1	1	1.1	1	2.3	4.2	1	1.2	1.4
S03	NeutralDogs_surprise	33	female	100	264.5	9	2.63	2.75	17	20	26	15	5.1	3.2	4.5	1.1	1.8	1	1	1	4.6	1.9	2.7	1.1	1.5	1	1	1	3.7	1.4	1.3	2	1.3	1	1.1	1	3.8	1.3	1.3	2	1.1	1	1.1	1	2.3	4.2	1	1.2	1.4
S03	NeutralHumans_arousal	33	female	100	264.5	9	2.63	2.75	17	20	26	15	5.1	3.2	4.5	1.1	1.8	1	1	1	4.6	1.9	2.7	1.1	1.5	1	1	1	3.7	1.4	1.3	2	1.3	1	1.1	1	3.8	1.3	1.3	2	1.1	1	1.1	1	2.3	4.2	1	1.2	1.4
S03	NeutralHumans_happiness	33	female	100	264.5	9	2.63	2.75	17	20	26	15	5.1	3.2	4.5	1.1	1.8	1	1	1	4.6	1.9	2.7	1.1	1.5	1	1	1	3.7	1.4	1.3	2	1.3	1	1.1	1	3.8	1.3	1.3	2	1.1	1	1.1	1	2.3	4.2	1	1.2	1.4
S03	NeutralHumans_disgust	33	female	100	264.5	9	2.63	2.75	17	20	26	15	5.1	3.2	4.5	1.1	1.8	1	1	1	4.6	1.9	2.7	1.1	1.5	1	1	1	3.7	1.4	1.3	2	1.3	1	1.1	1	3.8	1.3	1.3	2	1.1	1	1.1	1	2.3	4.2	1	1.2	1.4
S03	NeutralHumans_fear	33	female	100	264.5	9	2.63	2.75	17	20	26	15	5.1	3.2	4.5	1.1	1.8	1	1	1	4.6	1.9	2.7	1.1	1.5	1	1	1	3.7	1.4	1.3	2	1.3	1	1.1	1	3.8	1.3	1.3	2	1.1	1	1.1	1	2.3	4.2	1	1.2	1.4
S03	NeutralHumans_sadness	33	female	100	264.5	9	2.63	2.75	17	20	26	15	5.1	3.2	4.5	1.1	1.8	1	1	1	4.6	1.9	2.7	1.1	1.5	1	1	1	3.7	1.4	1.3	2	1.3	1	1.1	1	3.8	1.3	1.3	2	1.1	1	1.1	1	2.3	4.2	1	1.2	1.4
S03	NeutralHumans_valence	33	female	100	264.5	9	2.63	2.75	17	20	26	15	5.1	3.2	4.5	1.1	1.8	1	1	1	4.6	1.9	2.7	1.1	1.5	1	1	1	3.7	1.4	1.3	2	1.3	1	1.1	1	3.8	1.3	1.3	2	1.1	1	1.1	1	2.3	4.2	1	1.2	1.4
S03	NeutralHumans_anger	33	female	100	264.5	9	2.63	2.75	17	20	26	15	5.1	3.2	4.5	1.1	1.8	1	1	1	4.6	1.9	2.7	1.1	1.5	1	1	1	3.7	1.4	1.3	2	1.3	1	1.1	1	3.8	1.3	1.3	2	1.1	1	1.1	1	2.3	4.2	1	1.2	1.4
S03	NeutralHumans_surprise	33	female	100	264.5	9	2.63	2.75	17	20	26	15	5.1	3.2	4.5	1.1	1.8	1	1	1	4.6	1.9	2.7	1.1	1.5	1	1	1	3.7	1.4	1.3	2	1.3	1	1.1	1	3.8	1.3	1.3	2	1.1	1	1.1	1	2.3	4.2	1	1.2	1.4
S03	Object_arousal	33	female	100	264.5	9	2.63	2.75	17	20	26	15	5.1	3.2	4.5	1.1	1.8	1	1	1	4.6	1.9	2.7	1.1	1.5	1	1	1	3.7	1.4	1.3	2	1.3	1	1.1	1	3.8	1.3	1.3	2	1.1	1	1.1	1	2.3	4.2	1	1.2	1.4
S03	Object_happiness	33	female	100	264.5	9	2.63	2.75	17	20	26	15	5.1	3.2	4.5	1.1	1.8	1	1	1	4.6	1.9	2.7	1.1	1.5	1	1	1	3.7	1.4	1.3	2	1.3	1	1.1	1	3.8	1.3	1.3	2	1.1	1	1.1	1	2.3	4.2	1	1.2	1.4
S03	Object_disgust	33	female	100	264.5	9	2.63	2.75	17	20	26	15	5.1	3.2	4.5	1.1	1.8	1	1	1	4.6	1.9	2.7	1.1	1.5	1	1	1	3.7	1.4	1.3	2	1.3	1	1.1	1	3.8	1.3	1.3	2	1.1	1	1.1	1	2.3	4.2	1	1.2	1.4
S03	Object_fear	33	female	100	264.5	9	2.63	2.75	17	20	26	15	5.1	3.2	4.5	1.1	1.8	1	1	1	4.6	1.9	2.7	1.1	1.5	1	1	1	3.7	1.4	1.3	2	1.3	1	1.1	1	3.8	1.3	1.3	2	1.1	1	1.1	1	2.3	4.2	1	1.2	1.4
S03	Object_sadness	33	female	100	264.5	9	2.63	2.75	17	20	26	15	5.1	3.2	4.5	1.1	1.8	1	1	1	4.6	1.9	2.7	1.1	1.5	1	1	1	3.7	1.4	1.3	2	1.3	1	1.1	1	3.8	1.3	1.3	2	1.1	1	1.1	1	2.3	4.2	1	1.2	1.4
S03	Object_valence	33	female	100	264.5	9	2.63	2.75	17	20	26	15	5.1	3.2	4.5	1.1	1.8	1	1	1	4.6	1.9	2.7	1.1	1.5	1	1	1	3.7	1.4	1.3	2	1.3	1	1.1	1	3.8	1.3	1.3	2	1.1	1	1.1	1	2.3	4.2	1	1.2	1.4
S03	Object_anger	33	female	100	264.5	9	2.63	2.75	17	20	26	15	5.1	3.2	4.5	1.1	1.8	1	1	1	4.6	1.9	2.7	1.1	1.5	1	1	1	3.7	1.4	1.3	2	1.3	1	1.1	1	3.8	1.3	1.3	2	1.1	1	1.1	1	2.3	4.2	1	1.2	1.4
S03	Object_surprise	33	female	100	264.5	9	2.63	2.75	17	20	26	15	5.1	3.2	4.5	1.1	1.8	1	1	1	4.6	1.9	2.7	1.1	1.5	1	1	1	3.7	1.4	1.3	2	1.3	1	1.1	1	3.8	1.3	1.3	2	1.1	1	1.1	1	2.3	4.2	1	1.2	1.4
S03	Pixel_arousal	33	female	100	264.5	9	2.63	2.75	17	20	26	15	5.1	3.2	4.5	1.1	1.8	1	1	1	4.6	1.9	2.7	1.1	1.5	1	1	1	3.7	1.4	1.3	2	1.3	1	1.1	1	3.8	1.3	1.3	2	1.1	1	1.1	1	2.3	4.2	1	1.2	1.4
S03	Pixel_happiness	33	female	100	264.5	9	2.63	2.75	17	20	26	15	5.1	3.2	4.5	1.1	1.8	1	1	1	4.6	1.9	2.7	1.1	1.5	1	1	1	3.7	1.4	1.3	2	1.3	1	1.1	1	3.8	1.3	1.3	2	1.1	1	1.1	1	2.3	4.2	1	1.2	1.4
S03	Pixel_disgust	33	female	100	264.5	9	2.63	2.75	17	20	26	15	5.1	3.2	4.5	1.1	1.8	1	1	1	4.6	1.9	2.7	1.1	1.5	1	1	1	3.7	1.4	1.3	2	1.3	1	1.1	1	3.8	1.3	1.3	2	1.1	1	1.1	1	2.3	4.2	1	1.2	1.4
S03	Pixel_fear	33	female	100	264.5	9	2.63	2.75	17	20	26	15	5.1	3.2	4.5	1.1	1.8	1	1	1	4.6	1.9	2.7	1.1	1.5	1	1	1	3.7	1.4	1.3	2	1.3	1	1.1	1	3.8	1.3	1.3	2	1.1	1	1.1	1	2.3	4.2	1	1.2	1.4
S03	Pixel_sadness	33	female	100	264.5	9	2.63	2.75	17	20	26	15	5.1	3.2	4.5	1.1	1.8	1	1	1	4.6	1.9	2.7	1.1	1.5	1	1	1	3.7	1.4	1.3	2	1.3	1	1.1	1	3.8	1.3	1.3	2	1.1	1	1.1	1	2.3	4.2	1	1.2	1.4
S03	Pixel_valence	33	female	100	264.5	9	2.63	2.75	17	20	26	15	5.1	3.2	4.5	1.1	1.8	1	1	1	4.6	1.9	2.7	1.1	1.5	1	1	1	3.7	1.4	1.3	2	1.3	1	1.1	1	3.8	1.3	1.3	2	1.1	1	1.1	1	2.3	4.2	1	1.2	1.4
S03	Pixel_anger	33	female	100	264.5	9	2.63	2.75	17	20	26	15	5.1	3.2	4.5	1.1	1.8	1	1	1	4.6	1.9	2.7	1.1	1.5	1	1	1	3.7	1.4	1.3	2	1.3	1	1.1	1	3.8	1.3	1.3	2	1.1	1	1.1	1	2.3	4.2	1	1.2	1.4
S03	Pixel_surprise	33	female	100	264.5	9	2.63	2.75	17	20	26	15	5.1	3.2	4.5	1.1	1.8	1	1	1	4.6	1.9	2.7	1.1	1.5	1	1	1	3.7	1.4	1.3	2	1.3	1	1.1	1	3.8	1.3	1.3	2	1.1	1	1.1	1	2.3	4.2	1	1.2	1.4
S04	ThreateningDogs_arousal	35	female	100	392.5	17	3.5	2	21	21	26	23	5.8	4.3	5.4	1.2	2	1	1	1	4.4	1.8	4.8	1.2	2.3	1	1	1	3.9	1.7	1.9	1.7	1.4	2	1.2	1.3	3.8	2.6	2.9	2.4	2.5	1.2	1.7	1.8	1.9	5.3	1.1	1.9	2.7
S04	ThreateningDogs_happiness	35	female	100	392.5	17	3.5	2	21	21	26	23	5.8	4.3	5.4	1.2	2	1	1	1	4.4	1.8	4.8	1.2	2.3	1	1	1	3.9	1.7	1.9	1.7	1.4	2	1.2	1.3	3.8	2.6	2.9	2.4	2.5	1.2	1.7	1.8	1.9	5.3	1.1	1.9	2.7
S04	ThreateningDogs_disgust	35	female	100	392.5	17	3.5	2	21	21	26	23	5.8	4.3	5.4	1.2	2	1	1	1	4.4	1.8	4.8	1.2	2.3	1	1	1	3.9	1.7	1.9	1.7	1.4	2	1.2	1.3	3.8	2.6	2.9	2.4	2.5	1.2	1.7	1.8	1.9	5.3	1.1	1.9	2.7
S04	ThreateningDogs_fear	35	female	100	392.5	17	3.5	2	21	21	26	23	5.8	4.3	5.4	1.2	2	1	1	1	4.4	1.8	4.8	1.2	2.3	1	1	1	3.9	1.7	1.9	1.7	1.4	2	1.2	1.3	3.8	2.6	2.9	2.4	2.5	1.2	1.7	1.8	1.9	5.3	1.1	1.9	2.7
S04	ThreateningDogs_sadness	35	female	100	392.5	17	3.5	2	21	21	26	23	5.8	4.3	5.4	1.2	2	1	1	1	4.4	1.8	4.8	1.2	2.3	1	1	1	3.9	1.7	1.9	1.7	1.4	2	1.2	1.3	3.8	2.6	2.9	2.4	2.5	1.2	1.7	1.8	1.9	5.3	1.1	1.9	2.7
S04	ThreateningDogs_valence	35	female	100	392.5	17	3.5	2	21	21	26	23	5.8	4.3	5.4	1.2	2	1	1	1	4.4	1.8	4.8	1.2	2.3	1	1	1	3.9	1.7	1.9	1.7	1.4	2	1.2	1.3	3.8	2.6	2.9	2.4	2.5	1.2	1.7	1.8	1.9	5.3	1.1	1.9	2.7
S04	ThreateningDogs_anger	35	female	100	392.5	17	3.5	2	21	21	26	23	5.8	4.3	5.4	1.2	2	1	1	1	4.4	1.8	4.8	1.2	2.3	1	1	1	3.9	1.7	1.9	1.7	1.4	2	1.2	1.3	3.8	2.6	2.9	2.4	2.5	1.2	1.7	1.8	1.9	5.3	1.1	1.9	2.7
S04	ThreateningDogs_surprise	35	female	100	392.5	17	3.5	2	21	21	26	23	5.8	4.3	5.4	1.2	2	1	1	1	4.4	1.8	4.8	1.2	2.3	1	1	1	3.9	1.7	1.9	1.7	1.4	2	1.2	1.3	3.8	2.6	2.9	2.4	2.5	1.2	1.7	1.8	1.9	5.3	1.1	1.9	2.7
S04	ThreateningHumans_arousal	35	female	100	392.5	17	3.5	2	21	21	26	23	5.8	4.3	5.4	1.2	2	1	1	1	4.4	1.8	4.8	1.2	2.3	1	1	1	3.9	1.7	1.9	1.7	1.4	2	1.2	1.3	3.8	2.6	2.9	2.4	2.5	1.2	1.7	1.8	1.9	5.3	1.1	1.9	2.7
S04	ThreateningHumans_happiness	35	female	100	392.5	17	3.5	2	21	21	26	23	5.8	4.3	5.4	1.2	2	1	1	1	4.4	1.8	4.8	1.2	2.3	1	1	1	3.9	1.7	1.9	1.7	1.4	2	1.2	1.3	3.8	2.6	2.9	2.4	2.5	1.2	1.7	1.8	1.9	5.3	1.1	1.9	2.7
S04	ThreateningHumans_disgust	35	female	100	392.5	17	3.5	2	21	21	26	23	5.8	4.3	5.4	1.2	2	1	1	1	4.4	1.8	4.8	1.2	2.3	1	1	1	3.9	1.7	1.9	1.7	1.4	2	1.2	1.3	3.8	2.6	2.9	2.4	2.5	1.2	1.7	1.8	1.9	5.3	1.1	1.9	2.7
S04	ThreateningHumans_fear	35	female	100	392.5	17	3.5	2	21	21	26	23	5.8	4.3	5.4	1.2	2	1	1	1	4.4	1.8	4.8	1.2	2.3	1	1	1	3.9	1.7	1.9	1.7	1.4	2	1.2	1.3	3.8	2.6	2.9	2.4	2.5	1.2	1.7	1.8	1.9	5.3	1.1	1.9	2.7
S04	ThreateningHumans_sadness	35	female	100	392.5	17	3.5	2	21	21	26	23	5.8	4.3	5.4	1.2	2	1	1	1	4.4	1.8	4.8	1.2	2.3	1	1	1	3.9	1.7	1.9	1.7	1.4	2	1.2	1.3	3.8	2.6	2.9	2.4	2.5	1.2	1.7	1.8	1.9	5.3	1.1	1.9	2.7
S04	ThreateningHumans_valence	35	female	100	392.5	17	3.5	2	21	21	26	23	5.8	4.3	5.4	1.2	2	1	1	1	4.4	1.8	4.8	1.2	2.3	1	1	1	3.9	1.7	1.9	1.7	1.4	2	1.2	1.3	3.8	2.6	2.9	2.4	2.5	1.2	1.7	1.8	1.9	5.3	1.1	1.9	2.7
S04	ThreateningHumans_anger	35	female	100	392.5	17	3.5	2	21	21	26	23	5.8	4.3	5.4	1.2	2	1	1	1	4.4	1.8	4.8	1.2	2.3	1	1	1	3.9	1.7	1.9	1.7	1.4	2	1.2	1.3	3.8	2.6	2.9	2.4	2.5	1.2	1.7	1.8	1.9	5.3	1.1	1.9	2.7
S04	ThreateningHumans_surprise	35	female	100	392.5	17	3.5	2	21	21	26	23	5.8	4.3	5.4	1.2	2	1	1	1	4.4	1.8	4.8	1.2	2.3	1	1	1	3.9	1.7	1.9	1.7	1.4	2	1.2	1.3	3.8	2.6	2.9	2.4	2.5	1.2	1.7	1.8	1.9	5.3	1.1	1.9	2.7
S04	PleasantDogs_arousal	35	female	100	392.5	17	3.5	2	21	21	26	23	5.8	4.3	5.4	1.2	2	1	1	1	4.4	1.8	4.8	1.2	2.3	1	1	1	3.9	1.7	1.9	1.7	1.4	2	1.2	1.3	3.8	2.6	2.9	2.4	2.5	1.2	1.7	1.8	1.9	5.3	1.1	1.9	2.7
S04	PleasantDogs_happiness	35	female	100	392.5	17	3.5	2	21	21	26	23	5.8	4.3	5.4	1.2	2	1	1	1	4.4	1.8	4.8	1.2	2.3	1	1	1	3.9	1.7	1.9	1.7	1.4	2	1.2	1.3	3.8	2.6	2.9	2.4	2.5	1.2	1.7	1.8	1.9	5.3	1.1	1.9	2.7
S04	PleasantDogs_disgust	35	female	100	392.5	17	3.5	2	21	21	26	23	5.8	4.3	5.4	1.2	2	1	1	1	4.4	1.8	4.8	1.2	2.3	1	1	1	3.9	1.7	1.9	1.7	1.4	2	1.2	1.3	3.8	2.6	2.9	2.4	2.5	1.2	1.7	1.8	1.9	5.3	1.1	1.9	2.7
S04	PleasantDogs_fear	35	female	100	392.5	17	3.5	2	21	21	26	23	5.8	4.3	5.4	1.2	2	1	1	1	4.4	1.8	4.8	1.2	2.3	1	1	1	3.9	1.7	1.9	1.7	1.4	2	1.2	1.3	3.8	2.6	2.9	2.4	2.5	1.2	1.7	1.8	1.9	5.3	1.1	1.9	2.7
S04	PleasantDogs_sadness	35	female	100	392.5	17	3.5	2	21	21	26	23	5.8	4.3	5.4	1.2	2	1	1	1	4.4	1.8	4.8	1.2	2.3	1	1	1	3.9	1.7	1.9	1.7	1.4	2	1.2	1.3	3.8	2.6	2.9	2.4	2.5	1.2	1.7	1.8	1.9	5.3	1.1	1.9	2.7
S04	PleasantDogs_valence	35	female	100	392.5	17	3.5	2	21	21	26	23	5.8	4.3	5.4	1.2	2	1	1	1	4.4	1.8	4.8	1.2	2.3	1	1	1	3.9	1.7	1.9	1.7	1.4	2	1.2	1.3	3.8	2.6	2.9	2.4	2.5	1.2	1.7	1.8	1.9	5.3	1.1	1.9	2.7
S04	PleasantDogs_anger	35	female	100	392.5	17	3.5	2	21	21	26	23	5.8	4.3	5.4	1.2	2	1	1	1	4.4	1.8	4.8	1.2	2.3	1	1	1	3.9	1.7	1.9	1.7	1.4	2	1.2	1.3	3.8	2.6	2.9	2.4	2.5	1.2	1.7	1.8	1.9	5.3	1.1	1.9	2.7
S04	PleasantDogs_surprise	35	female	100	392.5	17	3.5	2	21	21	26	23	5.8	4.3	5.4	1.2	2	1	1	1	4.4	1.8	4.8	1.2	2.3	1	1	1	3.9	1.7	1.9	1.7	1.4	2	1.2	1.3	3.8	2.6	2.9	2.4	2.5	1.2	1.7	1.8	1.9	5.3	1.1	1.9	2.7
S04	PleasantHumans_arousal	35	female	100	392.5	17	3.5	2	21	21	26	23	5.8	4.3	5.4	1.2	2	1	1	1	4.4	1.8	4.8	1.2	2.3	1	1	1	3.9	1.7	1.9	1.7	1.4	2	1.2	1.3	3.8	2.6	2.9	2.4	2.5	1.2	1.7	1.8	1.9	5.3	1.1	1.9	2.7
S04	PleasantHumans_happiness	35	female	100	392.5	17	3.5	2	21	21	26	23	5.8	4.3	5.4	1.2	2	1	1	1	4.4	1.8	4.8	1.2	2.3	1	1	1	3.9	1.7	1.9	1.7	1.4	2	1.2	1.3	3.8	2.6	2.9	2.4	2.5	1.2	1.7	1.8	1.9	5.3	1.1	1.9	2.7
S04	PleasantHumans_disgust	35	female	100	392.5	17	3.5	2	21	21	26	23	5.8	4.3	5.4	1.2	2	1	1	1	4.4	1.8	4.8	1.2	2.3	1	1	1	3.9	1.7	1.9	1.7	1.4	2	1.2	1.3	3.8	2.6	2.9	2.4	2.5	1.2	1.7	1.8	1.9	5.3	1.1	1.9	2.7
S04	PleasantHumans_fear	35	female	100	392.5	17	3.5	2	21	21	26	23	5.8	4.3	5.4	1.2	2	1	1	1	4.4	1.8	4.8	1.2	2.3	1	1	1	3.9	1.7	1.9	1.7	1.4	2	1.2	1.3	3.8	2.6	2.9	2.4	2.5	1.2	1.7	1.8	1.9	5.3	1.1	1.9	2.7
S04	PleasantHumans_sadness	35	female	100	392.5	17	3.5	2	21	21	26	23	5.8	4.3	5.4	1.2	2	1	1	1	4.4	1.8	4.8	1.2	2.3	1	1	1	3.9	1.7	1.9	1.7	1.4	2	1.2	1.3	3.8	2.6	2.9	2.4	2.5	1.2	1.7	1.8	1.9	5.3	1.1	1.9	2.7
S04	PleasantHumans_valence	35	female	100	392.5	17	3.5	2	21	21	26	23	5.8	4.3	5.4	1.2	2	1	1	1	4.4	1.8	4.8	1.2	2.3	1	1	1	3.9	1.7	1.9	1.7	1.4	2	1.2	1.3	3.8	2.6	2.9	2.4	2.5	1.2	1.7	1.8	1.9	5.3	1.1	1.9	2.7
S04	PleasantHumans_anger	35	female	100	392.5	17	3.5	2	21	21	26	23	5.8	4.3	5.4	1.2	2	1	1	1	4.4	1.8	4.8	1.2	2.3	1	1	1	3.9	1.7	1.9	1.7	1.4	2	1.2	1.3	3.8	2.6	2.9	2.4	2.5	1.2	1.7	1.8	1.9	5.3	1.1	1.9	2.7
S04	PleasantHumans_surprise	35	female	100	392.5	17	3.5	2	21	21	26	23	5.8	4.3	5.4	1.2	2	1	1	1	4.4	1.8	4.8	1.2	2.3	1	1	1	3.9	1.7	1.9	1.7	1.4	2	1.2	1.3	3.8	2.6	2.9	2.4	2.5	1.2	1.7	1.8	1.9	5.3	1.1	1.9	2.7
S04	NeutralDogs_arousal	35	female	100	392.5	17	3.5	2	21	21	26	23	5.8	4.3	5.4	1.2	2	1	1	1	4.4	1.8	4.8	1.2	2.3	1	1	1	3.9	1.7	1.9	1.7	1.4	2	1.2	1.3	3.8	2.6	2.9	2.4	2.5	1.2	1.7	1.8	1.9	5.3	1.1	1.9	2.7
S04	NeutralDogs_happiness	35	female	100	392.5	17	3.5	2	21	21	26	23	5.8	4.3	5.4	1.2	2	1	1	1	4.4	1.8	4.8	1.2	2.3	1	1	1	3.9	1.7	1.9	1.7	1.4	2	1.2	1.3	3.8	2.6	2.9	2.4	2.5	1.2	1.7	1.8	1.9	5.3	1.1	1.9	2.7
S04	NeutralDogs_disgust	35	female	100	392.5	17	3.5	2	21	21	26	23	5.8	4.3	5.4	1.2	2	1	1	1	4.4	1.8	4.8	1.2	2.3	1	1	1	3.9	1.7	1.9	1.7	1.4	2	1.2	1.3	3.8	2.6	2.9	2.4	2.5	1.2	1.7	1.8	1.9	5.3	1.1	1.9	2.7
S04	NeutralDogs_fear	35	female	100	392.5	17	3.5	2	21	21	26	23	5.8	4.3	5.4	1.2	2	1	1	1	4.4	1.8	4.8	1.2	2.3	1	1	1	3.9	1.7	1.9	1.7	1.4	2	1.2	1.3	3.8	2.6	2.9	2.4	2.5	1.2	1.7	1.8	1.9	5.3	1.1	1.9	2.7
S04	NeutralDogs_sadness	35	female	100	392.5	17	3.5	2	21	21	26	23	5.8	4.3	5.4	1.2	2	1	1	1	4.4	1.8	4.8	1.2	2.3	1	1	1	3.9	1.7	1.9	1.7	1.4	2	1.2	1.3	3.8	2.6	2.9	2.4	2.5	1.2	1.7	1.8	1.9	5.3	1.1	1.9	2.7
S04	NeutralDogs_valence	35	female	100	392.5	17	3.5	2	21	21	26	23	5.8	4.3	5.4	1.2	2	1	1	1	4.4	1.8	4.8	1.2	2.3	1	1	1	3.9	1.7	1.9	1.7	1.4	2	1.2	1.3	3.8	2.6	2.9	2.4	2.5	1.2	1.7	1.8	1.9	5.3	1.1	1.9	2.7
S04	NeutralDogs_anger	35	female	100	392.5	17	3.5	2	21	21	26	23	5.8	4.3	5.4	1.2	2	1	1	1	4.4	1.8	4.8	1.2	2.3	1	1	1	3.9	1.7	1.9	1.7	1.4	2	1.2	1.3	3.8	2.6	2.9	2.4	2.5	1.2	1.7	1.8	1.9	5.3	1.1	1.9	2.7
S04	NeutralDogs_surprise	35	female	100	392.5	17	3.5	2	21	21	26	23	5.8	4.3	5.4	1.2	2	1	1	1	4.4	1.8	4.8	1.2	2.3	1	1	1	3.9	1.7	1.9	1.7	1.4	2	1.2	1.3	3.8	2.6	2.9	2.4	2.5	1.2	1.7	1.8	1.9	5.3	1.1	1.9	2.7
S04	NeutralHumans_arousal	35	female	100	392.5	17	3.5	2	21	21	26	23	5.8	4.3	5.4	1.2	2	1	1	1	4.4	1.8	4.8	1.2	2.3	1	1	1	3.9	1.7	1.9	1.7	1.4	2	1.2	1.3	3.8	2.6	2.9	2.4	2.5	1.2	1.7	1.8	1.9	5.3	1.1	1.9	2.7
S04	NeutralHumans_happiness	35	female	100	392.5	17	3.5	2	21	21	26	23	5.8	4.3	5.4	1.2	2	1	1	1	4.4	1.8	4.8	1.2	2.3	1	1	1	3.9	1.7	1.9	1.7	1.4	2	1.2	1.3	3.8	2.6	2.9	2.4	2.5	1.2	1.7	1.8	1.9	5.3	1.1	1.9	2.7
S04	NeutralHumans_disgust	35	female	100	392.5	17	3.5	2	21	21	26	23	5.8	4.3	5.4	1.2	2	1	1	1	4.4	1.8	4.8	1.2	2.3	1	1	1	3.9	1.7	1.9	1.7	1.4	2	1.2	1.3	3.8	2.6	2.9	2.4	2.5	1.2	1.7	1.8	1.9	5.3	1.1	1.9	2.7
S04	NeutralHumans_fear	35	female	100	392.5	17	3.5	2	21	21	26	23	5.8	4.3	5.4	1.2	2	1	1	1	4.4	1.8	4.8	1.2	2.3	1	1	1	3.9	1.7	1.9	1.7	1.4	2	1.2	1.3	3.8	2.6	2.9	2.4	2.5	1.2	1.7	1.8	1.9	5.3	1.1	1.9	2.7
S04	NeutralHumans_sadness	35	female	100	392.5	17	3.5	2	21	21	26	23	5.8	4.3	5.4	1.2	2	1	1	1	4.4	1.8	4.8	1.2	2.3	1	1	1	3.9	1.7	1.9	1.7	1.4	2	1.2	1.3	3.8	2.6	2.9	2.4	2.5	1.2	1.7	1.8	1.9	5.3	1.1	1.9	2.7
S04	NeutralHumans_valence	35	female	100	392.5	17	3.5	2	21	21	26	23	5.8	4.3	5.4	1.2	2	1	1	1	4.4	1.8	4.8	1.2	2.3	1	1	1	3.9	1.7	1.9	1.7	1.4	2	1.2	1.3	3.8	2.6	2.9	2.4	2.5	1.2	1.7	1.8	1.9	5.3	1.1	1.9	2.7
S04	NeutralHumans_anger	35	female	100	392.5	17	3.5	2	21	21	26	23	5.8	4.3	5.4	1.2	2	1	1	1	4.4	1.8	4.8	1.2	2.3	1	1	1	3.9	1.7	1.9	1.7	1.4	2	1.2	1.3	3.8	2.6	2.9	2.4	2.5	1.2	1.7	1.8	1.9	5.3	1.1	1.9	2.7
S04	NeutralHumans_surprise	35	female	100	392.5	17	3.5	2	21	21	26	23	5.8	4.3	5.4	1.2	2	1	1	1	4.4	1.8	4.8	1.2	2.3	1	1	1	3.9	1.7	1.9	1.7	1.4	2	1.2	1.3	3.8	2.6	2.9	2.4	2.5	1.2	1.7	1.8	1.9	5.3	1.1	1.9	2.7
S04	Object_arousal	35	female	100	392.5	17	3.5	2	21	21	26	23	5.8	4.3	5.4	1.2	2	1	1	1	4.4	1.8	4.8	1.2	2.3	1	1	1	3.9	1.7	1.9	1.7	1.4	2	1.2	1.3	3.8	2.6	2.9	2.4	2.5	1.2	1.7	1.8	1.9	5.3	1.1	1.9	2.7
S04	Object_happiness	35	female	100	392.5	17	3.5	2	21	21	26	23	5.8	4.3	5.4	1.2	2	1	1	1	4.4	1.8	4.8	1.2	2.3	1	1	1	3.9	1.7	1.9	1.7	1.4	2	1.2	1.3	3.8	2.6	2.9	2.4	2.5	1.2	1.7	1.8	1.9	5.3	1.1	1.9	2.7
S04	Object_disgust	35	female	100	392.5	17	3.5	2	21	21	26	23	5.8	4.3	5.4	1.2	2	1	1	1	4.4	1.8	4.8	1.2	2.3	1	1	1	3.9	1.7	1.9	1.7	1.4	2	1.2	1.3	3.8	2.6	2.9	2.4	2.5	1.2	1.7	1.8	1.9	5.3	1.1	1.9	2.7
S04	Object_fear	35	female	100	392.5	17	3.5	2	21	21	26	23	5.8	4.3	5.4	1.2	2	1	1	1	4.4	1.8	4.8	1.2	2.3	1	1	1	3.9	1.7	1.9	1.7	1.4	2	1.2	1.3	3.8	2.6	2.9	2.4	2.5	1.2	1.7	1.8	1.9	5.3	1.1	1.9	2.7
S04	Object_sadness	35	female	100	392.5	17	3.5	2	21	21	26	23	5.8	4.3	5.4	1.2	2	1	1	1	4.4	1.8	4.8	1.2	2.3	1	1	1	3.9	1.7	1.9	1.7	1.4	2	1.2	1.3	3.8	2.6	2.9	2.4	2.5	1.2	1.7	1.8	1.9	5.3	1.1	1.9	2.7
S04	Object_valence	35	female	100	392.5	17	3.5	2	21	21	26	23	5.8	4.3	5.4	1.2	2	1	1	1	4.4	1.8	4.8	1.2	2.3	1	1	1	3.9	1.7	1.9	1.7	1.4	2	1.2	1.3	3.8	2.6	2.9	2.4	2.5	1.2	1.7	1.8	1.9	5.3	1.1	1.9	2.7
S04	Object_anger	35	female	100	392.5	17	3.5	2	21	21	26	23	5.8	4.3	5.4	1.2	2	1	1	1	4.4	1.8	4.8	1.2	2.3	1	1	1	3.9	1.7	1.9	1.7	1.4	2	1.2	1.3	3.8	2.6	2.9	2.4	2.5	1.2	1.7	1.8	1.9	5.3	1.1	1.9	2.7
S04	Object_surprise	35	female	100	392.5	17	3.5	2	21	21	26	23	5.8	4.3	5.4	1.2	2	1	1	1	4.4	1.8	4.8	1.2	2.3	1	1	1	3.9	1.7	1.9	1.7	1.4	2	1.2	1.3	3.8	2.6	2.9	2.4	2.5	1.2	1.7	1.8	1.9	5.3	1.1	1.9	2.7
S04	Pixel_arousal	35	female	100	392.5	17	3.5	2	21	21	26	23	5.8	4.3	5.4	1.2	2	1	1	1	4.4	1.8	4.8	1.2	2.3	1	1	1	3.9	1.7	1.9	1.7	1.4	2	1.2	1.3	3.8	2.6	2.9	2.4	2.5	1.2	1.7	1.8	1.9	5.3	1.1	1.9	2.7
S04	Pixel_happiness	35	female	100	392.5	17	3.5	2	21	21	26	23	5.8	4.3	5.4	1.2	2	1	1	1	4.4	1.8	4.8	1.2	2.3	1	1	1	3.9	1.7	1.9	1.7	1.4	2	1.2	1.3	3.8	2.6	2.9	2.4	2.5	1.2	1.7	1.8	1.9	5.3	1.1	1.9	2.7
S04	Pixel_disgust	35	female	100	392.5	17	3.5	2	21	21	26	23	5.8	4.3	5.4	1.2	2	1	1	1	4.4	1.8	4.8	1.2	2.3	1	1	1	3.9	1.7	1.9	1.7	1.4	2	1.2	1.3	3.8	2.6	2.9	2.4	2.5	1.2	1.7	1.8	1.9	5.3	1.1	1.9	2.7
S04	Pixel_fear	35	female	100	392.5	17	3.5	2	21	21	26	23	5.8	4.3	5.4	1.2	2	1	1	1	4.4	1.8	4.8	1.2	2.3	1	1	1	3.9	1.7	1.9	1.7	1.4	2	1.2	1.3	3.8	2.6	2.9	2.4	2.5	1.2	1.7	1.8	1.9	5.3	1.1	1.9	2.7
S04	Pixel_sadness	35	female	100	392.5	17	3.5	2	21	21	26	23	5.8	4.3	5.4	1.2	2	1	1	1	4.4	1.8	4.8	1.2	2.3	1	1	1	3.9	1.7	1.9	1.7	1.4	2	1.2	1.3	3.8	2.6	2.9	2.4	2.5	1.2	1.7	1.8	1.9	5.3	1.1	1.9	2.7
S04	Pixel_valence	35	female	100	392.5	17	3.5	2	21	21	26	23	5.8	4.3	5.4	1.2	2	1	1	1	4.4	1.8	4.8	1.2	2.3	1	1	1	3.9	1.7	1.9	1.7	1.4	2	1.2	1.3	3.8	2.6	2.9	2.4	2.5	1.2	1.7	1.8	1.9	5.3	1.1	1.9	2.7
S04	Pixel_anger	35	female	100	392.5	17	3.5	2	21	21	26	23	5.8	4.3	5.4	1.2	2	1	1	1	4.4	1.8	4.8	1.2	2.3	1	1	1	3.9	1.7	1.9	1.7	1.4	2	1.2	1.3	3.8	2.6	2.9	2.4	2.5	1.2	1.7	1.8	1.9	5.3	1.1	1.9	2.7
S04	Pixel_surprise	35	female	100	392.5	17	3.5	2	21	21	26	23	5.8	4.3	5.4	1.2	2	1	1	1	4.4	1.8	4.8	1.2	2.3	1	1	1	3.9	1.7	1.9	1.7	1.4	2	1.2	1.3	3.8	2.6	2.9	2.4	2.5	1.2	1.7	1.8	1.9	5.3	1.1	1.9	2.7
S05	ThreateningDogs_arousal	35	male	90	301.5	5	3.38	1.75	18	21	20	18	5.7	4.6	5.5	1.6	3.7	1.4	1.7	1.2	4.5	2.6	3.2	2.4	3.2	1.7	1.7	1.7	3.6	2.7	2	3.3	3.1	2.3	2.4	2.1	3.8	3.3	2.6	2.8	3.4	1.9	2.1	2	2.1	5.5	1.6	3.4	3.6
S05	ThreateningDogs_happiness	35	male	90	301.5	5	3.38	1.75	18	21	20	18	5.7	4.6	5.5	1.6	3.7	1.4	1.7	1.2	4.5	2.6	3.2	2.4	3.2	1.7	1.7	1.7	3.6	2.7	2	3.3	3.1	2.3	2.4	2.1	3.8	3.3	2.6	2.8	3.4	1.9	2.1	2	2.1	5.5	1.6	3.4	3.6
S05	ThreateningDogs_disgust	35	male	90	301.5	5	3.38	1.75	18	21	20	18	5.7	4.6	5.5	1.6	3.7	1.4	1.7	1.2	4.5	2.6	3.2	2.4	3.2	1.7	1.7	1.7	3.6	2.7	2	3.3	3.1	2.3	2.4	2.1	3.8	3.3	2.6	2.8	3.4	1.9	2.1	2	2.1	5.5	1.6	3.4	3.6
S05	ThreateningDogs_fear	35	male	90	301.5	5	3.38	1.75	18	21	20	18	5.7	4.6	5.5	1.6	3.7	1.4	1.7	1.2	4.5	2.6	3.2	2.4	3.2	1.7	1.7	1.7	3.6	2.7	2	3.3	3.1	2.3	2.4	2.1	3.8	3.3	2.6	2.8	3.4	1.9	2.1	2	2.1	5.5	1.6	3.4	3.6
S05	ThreateningDogs_sadness	35	male	90	301.5	5	3.38	1.75	18	21	20	18	5.7	4.6	5.5	1.6	3.7	1.4	1.7	1.2	4.5	2.6	3.2	2.4	3.2	1.7	1.7	1.7	3.6	2.7	2	3.3	3.1	2.3	2.4	2.1	3.8	3.3	2.6	2.8	3.4	1.9	2.1	2	2.1	5.5	1.6	3.4	3.6
S05	ThreateningDogs_valence	35	male	90	301.5	5	3.38	1.75	18	21	20	18	5.7	4.6	5.5	1.6	3.7	1.4	1.7	1.2	4.5	2.6	3.2	2.4	3.2	1.7	1.7	1.7	3.6	2.7	2	3.3	3.1	2.3	2.4	2.1	3.8	3.3	2.6	2.8	3.4	1.9	2.1	2	2.1	5.5	1.6	3.4	3.6
S05	ThreateningDogs_anger	35	male	90	301.5	5	3.38	1.75	18	21	20	18	5.7	4.6	5.5	1.6	3.7	1.4	1.7	1.2	4.5	2.6	3.2	2.4	3.2	1.7	1.7	1.7	3.6	2.7	2	3.3	3.1	2.3	2.4	2.1	3.8	3.3	2.6	2.8	3.4	1.9	2.1	2	2.1	5.5	1.6	3.4	3.6
S05	ThreateningDogs_surprise	35	male	90	301.5	5	3.38	1.75	18	21	20	18	5.7	4.6	5.5	1.6	3.7	1.4	1.7	1.2	4.5	2.6	3.2	2.4	3.2	1.7	1.7	1.7	3.6	2.7	2	3.3	3.1	2.3	2.4	2.1	3.8	3.3	2.6	2.8	3.4	1.9	2.1	2	2.1	5.5	1.6	3.4	3.6
S05	ThreateningHumans_arousal	35	male	90	301.5	5	3.38	1.75	18	21	20	18	5.7	4.6	5.5	1.6	3.7	1.4	1.7	1.2	4.5	2.6	3.2	2.4	3.2	1.7	1.7	1.7	3.6	2.7	2	3.3	3.1	2.3	2.4	2.1	3.8	3.3	2.6	2.8	3.4	1.9	2.1	2	2.1	5.5	1.6	3.4	3.6
S05	ThreateningHumans_happiness	35	male	90	301.5	5	3.38	1.75	18	21	20	18	5.7	4.6	5.5	1.6	3.7	1.4	1.7	1.2	4.5	2.6	3.2	2.4	3.2	1.7	1.7	1.7	3.6	2.7	2	3.3	3.1	2.3	2.4	2.1	3.8	3.3	2.6	2.8	3.4	1.9	2.1	2	2.1	5.5	1.6	3.4	3.6
S05	ThreateningHumans_disgust	35	male	90	301.5	5	3.38	1.75	18	21	20	18	5.7	4.6	5.5	1.6	3.7	1.4	1.7	1.2	4.5	2.6	3.2	2.4	3.2	1.7	1.7	1.7	3.6	2.7	2	3.3	3.1	2.3	2.4	2.1	3.8	3.3	2.6	2.8	3.4	1.9	2.1	2	2.1	5.5	1.6	3.4	3.6
S05	ThreateningHumans_fear	35	male	90	301.5	5	3.38	1.75	18	21	20	18	5.7	4.6	5.5	1.6	3.7	1.4	1.7	1.2	4.5	2.6	3.2	2.4	3.2	1.7	1.7	1.7	3.6	2.7	2	3.3	3.1	2.3	2.4	2.1	3.8	3.3	2.6	2.8	3.4	1.9	2.1	2	2.1	5.5	1.6	3.4	3.6
S05	ThreateningHumans_sadness	35	male	90	301.5	5	3.38	1.75	18	21	20	18	5.7	4.6	5.5	1.6	3.7	1.4	1.7	1.2	4.5	2.6	3.2	2.4	3.2	1.7	1.7	1.7	3.6	2.7	2	3.3	3.1	2.3	2.4	2.1	3.8	3.3	2.6	2.8	3.4	1.9	2.1	2	2.1	5.5	1.6	3.4	3.6
S05	ThreateningHumans_valence	35	male	90	301.5	5	3.38	1.75	18	21	20	18	5.7	4.6	5.5	1.6	3.7	1.4	1.7	1.2	4.5	2.6	3.2	2.4	3.2	1.7	1.7	1.7	3.6	2.7	2	3.3	3.1	2.3	2.4	2.1	3.8	3.3	2.6	2.8	3.4	1.9	2.1	2	2.1	5.5	1.6	3.4	3.6
S05	ThreateningHumans_anger	35	male	90	301.5	5	3.38	1.75	18	21	20	18	5.7	4.6	5.5	1.6	3.7	1.4	1.7	1.2	4.5	2.6	3.2	2.4	3.2	1.7	1.7	1.7	3.6	2.7	2	3.3	3.1	2.3	2.4	2.1	3.8	3.3	2.6	2.8	3.4	1.9	2.1	2	2.1	5.5	1.6	3.4	3.6
S05	ThreateningHumans_surprise	35	male	90	301.5	5	3.38	1.75	18	21	20	18	5.7	4.6	5.5	1.6	3.7	1.4	1.7	1.2	4.5	2.6	3.2	2.4	3.2	1.7	1.7	1.7	3.6	2.7	2	3.3	3.1	2.3	2.4	2.1	3.8	3.3	2.6	2.8	3.4	1.9	2.1	2	2.1	5.5	1.6	3.4	3.6
S05	PleasantDogs_arousal	35	male	90	301.5	5	3.38	1.75	18	21	20	18	5.7	4.6	5.5	1.6	3.7	1.4	1.7	1.2	4.5	2.6	3.2	2.4	3.2	1.7	1.7	1.7	3.6	2.7	2	3.3	3.1	2.3	2.4	2.1	3.8	3.3	2.6	2.8	3.4	1.9	2.1	2	2.1	5.5	1.6	3.4	3.6
S05	PleasantDogs_happiness	35	male	90	301.5	5	3.38	1.75	18	21	20	18	5.7	4.6	5.5	1.6	3.7	1.4	1.7	1.2	4.5	2.6	3.2	2.4	3.2	1.7	1.7	1.7	3.6	2.7	2	3.3	3.1	2.3	2.4	2.1	3.8	3.3	2.6	2.8	3.4	1.9	2.1	2	2.1	5.5	1.6	3.4	3.6
S05	PleasantDogs_disgust	35	male	90	301.5	5	3.38	1.75	18	21	20	18	5.7	4.6	5.5	1.6	3.7	1.4	1.7	1.2	4.5	2.6	3.2	2.4	3.2	1.7	1.7	1.7	3.6	2.7	2	3.3	3.1	2.3	2.4	2.1	3.8	3.3	2.6	2.8	3.4	1.9	2.1	2	2.1	5.5	1.6	3.4	3.6
S05	PleasantDogs_fear	35	male	90	301.5	5	3.38	1.75	18	21	20	18	5.7	4.6	5.5	1.6	3.7	1.4	1.7	1.2	4.5	2.6	3.2	2.4	3.2	1.7	1.7	1.7	3.6	2.7	2	3.3	3.1	2.3	2.4	2.1	3.8	3.3	2.6	2.8	3.4	1.9	2.1	2	2.1	5.5	1.6	3.4	3.6
S05	PleasantDogs_sadness	35	male	90	301.5	5	3.38	1.75	18	21	20	18	5.7	4.6	5.5	1.6	3.7	1.4	1.7	1.2	4.5	2.6	3.2	2.4	3.2	1.7	1.7	1.7	3.6	2.7	2	3.3	3.1	2.3	2.4	2.1	3.8	3.3	2.6	2.8	3.4	1.9	2.1	2	2.1	5.5	1.6	3.4	3.6
S05	PleasantDogs_valence	35	male	90	301.5	5	3.38	1.75	18	21	20	18	5.7	4.6	5.5	1.6	3.7	1.4	1.7	1.2	4.5	2.6	3.2	2.4	3.2	1.7	1.7	1.7	3.6	2.7	2	3.3	3.1	2.3	2.4	2.1	3.8	3.3	2.6	2.8	3.4	1.9	2.1	2	2.1	5.5	1.6	3.4	3.6
S05	PleasantDogs_anger	35	male	90	301.5	5	3.38	1.75	18	21	20	18	5.7	4.6	5.5	1.6	3.7	1.4	1.7	1.2	4.5	2.6	3.2	2.4	3.2	1.7	1.7	1.7	3.6	2.7	2	3.3	3.1	2.3	2.4	2.1	3.8	3.3	2.6	2.8	3.4	1.9	2.1	2	2.1	5.5	1.6	3.4	3.6
S05	PleasantDogs_surprise	35	male	90	301.5	5	3.38	1.75	18	21	20	18	5.7	4.6	5.5	1.6	3.7	1.4	1.7	1.2	4.5	2.6	3.2	2.4	3.2	1.7	1.7	1.7	3.6	2.7	2	3.3	3.1	2.3	2.4	2.1	3.8	3.3	2.6	2.8	3.4	1.9	2.1	2	2.1	5.5	1.6	3.4	3.6
S05	PleasantHumans_arousal	35	male	90	301.5	5	3.38	1.75	18	21	20	18	5.7	4.6	5.5	1.6	3.7	1.4	1.7	1.2	4.5	2.6	3.2	2.4	3.2	1.7	1.7	1.7	3.6	2.7	2	3.3	3.1	2.3	2.4	2.1	3.8	3.3	2.6	2.8	3.4	1.9	2.1	2	2.1	5.5	1.6	3.4	3.6
S05	PleasantHumans_happiness	35	male	90	301.5	5	3.38	1.75	18	21	20	18	5.7	4.6	5.5	1.6	3.7	1.4	1.7	1.2	4.5	2.6	3.2	2.4	3.2	1.7	1.7	1.7	3.6	2.7	2	3.3	3.1	2.3	2.4	2.1	3.8	3.3	2.6	2.8	3.4	1.9	2.1	2	2.1	5.5	1.6	3.4	3.6
S05	PleasantHumans_disgust	35	male	90	301.5	5	3.38	1.75	18	21	20	18	5.7	4.6	5.5	1.6	3.7	1.4	1.7	1.2	4.5	2.6	3.2	2.4	3.2	1.7	1.7	1.7	3.6	2.7	2	3.3	3.1	2.3	2.4	2.1	3.8	3.3	2.6	2.8	3.4	1.9	2.1	2	2.1	5.5	1.6	3.4	3.6
S05	PleasantHumans_fear	35	male	90	301.5	5	3.38	1.75	18	21	20	18	5.7	4.6	5.5	1.6	3.7	1.4	1.7	1.2	4.5	2.6	3.2	2.4	3.2	1.7	1.7	1.7	3.6	2.7	2	3.3	3.1	2.3	2.4	2.1	3.8	3.3	2.6	2.8	3.4	1.9	2.1	2	2.1	5.5	1.6	3.4	3.6
S05	PleasantHumans_sadness	35	male	90	301.5	5	3.38	1.75	18	21	20	18	5.7	4.6	5.5	1.6	3.7	1.4	1.7	1.2	4.5	2.6	3.2	2.4	3.2	1.7	1.7	1.7	3.6	2.7	2	3.3	3.1	2.3	2.4	2.1	3.8	3.3	2.6	2.8	3.4	1.9	2.1	2	2.1	5.5	1.6	3.4	3.6
S05	PleasantHumans_valence	35	male	90	301.5	5	3.38	1.75	18	21	20	18	5.7	4.6	5.5	1.6	3.7	1.4	1.7	1.2	4.5	2.6	3.2	2.4	3.2	1.7	1.7	1.7	3.6	2.7	2	3.3	3.1	2.3	2.4	2.1	3.8	3.3	2.6	2.8	3.4	1.9	2.1	2	2.1	5.5	1.6	3.4	3.6
S05	PleasantHumans_anger	35	male	90	301.5	5	3.38	1.75	18	21	20	18	5.7	4.6	5.5	1.6	3.7	1.4	1.7	1.2	4.5	2.6	3.2	2.4	3.2	1.7	1.7	1.7	3.6	2.7	2	3.3	3.1	2.3	2.4	2.1	3.8	3.3	2.6	2.8	3.4	1.9	2.1	2	2.1	5.5	1.6	3.4	3.6
S05	PleasantHumans_surprise	35	male	90	301.5	5	3.38	1.75	18	21	20	18	5.7	4.6	5.5	1.6	3.7	1.4	1.7	1.2	4.5	2.6	3.2	2.4	3.2	1.7	1.7	1.7	3.6	2.7	2	3.3	3.1	2.3	2.4	2.1	3.8	3.3	2.6	2.8	3.4	1.9	2.1	2	2.1	5.5	1.6	3.4	3.6
S05	NeutralDogs_arousal	35	male	90	301.5	5	3.38	1.75	18	21	20	18	5.7	4.6	5.5	1.6	3.7	1.4	1.7	1.2	4.5	2.6	3.2	2.4	3.2	1.7	1.7	1.7	3.6	2.7	2	3.3	3.1	2.3	2.4	2.1	3.8	3.3	2.6	2.8	3.4	1.9	2.1	2	2.1	5.5	1.6	3.4	3.6
S05	NeutralDogs_happiness	35	male	90	301.5	5	3.38	1.75	18	21	20	18	5.7	4.6	5.5	1.6	3.7	1.4	1.7	1.2	4.5	2.6	3.2	2.4	3.2	1.7	1.7	1.7	3.6	2.7	2	3.3	3.1	2.3	2.4	2.1	3.8	3.3	2.6	2.8	3.4	1.9	2.1	2	2.1	5.5	1.6	3.4	3.6
S05	NeutralDogs_disgust	35	male	90	301.5	5	3.38	1.75	18	21	20	18	5.7	4.6	5.5	1.6	3.7	1.4	1.7	1.2	4.5	2.6	3.2	2.4	3.2	1.7	1.7	1.7	3.6	2.7	2	3.3	3.1	2.3	2.4	2.1	3.8	3.3	2.6	2.8	3.4	1.9	2.1	2	2.1	5.5	1.6	3.4	3.6
S05	NeutralDogs_fear	35	male	90	301.5	5	3.38	1.75	18	21	20	18	5.7	4.6	5.5	1.6	3.7	1.4	1.7	1.2	4.5	2.6	3.2	2.4	3.2	1.7	1.7	1.7	3.6	2.7	2	3.3	3.1	2.3	2.4	2.1	3.8	3.3	2.6	2.8	3.4	1.9	2.1	2	2.1	5.5	1.6	3.4	3.6
S05	NeutralDogs_sadness	35	male	90	301.5	5	3.38	1.75	18	21	20	18	5.7	4.6	5.5	1.6	3.7	1.4	1.7	1.2	4.5	2.6	3.2	2.4	3.2	1.7	1.7	1.7	3.6	2.7	2	3.3	3.1	2.3	2.4	2.1	3.8	3.3	2.6	2.8	3.4	1.9	2.1	2	2.1	5.5	1.6	3.4	3.6
S05	NeutralDogs_valence	35	male	90	301.5	5	3.38	1.75	18	21	20	18	5.7	4.6	5.5	1.6	3.7	1.4	1.7	1.2	4.5	2.6	3.2	2.4	3.2	1.7	1.7	1.7	3.6	2.7	2	3.3	3.1	2.3	2.4	2.1	3.8	3.3	2.6	2.8	3.4	1.9	2.1	2	2.1	5.5	1.6	3.4	3.6
S05	NeutralDogs_anger	35	male	90	301.5	5	3.38	1.75	18	21	20	18	5.7	4.6	5.5	1.6	3.7	1.4	1.7	1.2	4.5	2.6	3.2	2.4	3.2	1.7	1.7	1.7	3.6	2.7	2	3.3	3.1	2.3	2.4	2.1	3.8	3.3	2.6	2.8	3.4	1.9	2.1	2	2.1	5.5	1.6	3.4	3.6
S05	NeutralDogs_surprise	35	male	90	301.5	5	3.38	1.75	18	21	20	18	5.7	4.6	5.5	1.6	3.7	1.4	1.7	1.2	4.5	2.6	3.2	2.4	3.2	1.7	1.7	1.7	3.6	2.7	2	3.3	3.1	2.3	2.4	2.1	3.8	3.3	2.6	2.8	3.4	1.9	2.1	2	2.1	5.5	1.6	3.4	3.6
S05	NeutralHumans_arousal	35	male	90	301.5	5	3.38	1.75	18	21	20	18	5.7	4.6	5.5	1.6	3.7	1.4	1.7	1.2	4.5	2.6	3.2	2.4	3.2	1.7	1.7	1.7	3.6	2.7	2	3.3	3.1	2.3	2.4	2.1	3.8	3.3	2.6	2.8	3.4	1.9	2.1	2	2.1	5.5	1.6	3.4	3.6
S05	NeutralHumans_happiness	35	male	90	301.5	5	3.38	1.75	18	21	20	18	5.7	4.6	5.5	1.6	3.7	1.4	1.7	1.2	4.5	2.6	3.2	2.4	3.2	1.7	1.7	1.7	3.6	2.7	2	3.3	3.1	2.3	2.4	2.1	3.8	3.3	2.6	2.8	3.4	1.9	2.1	2	2.1	5.5	1.6	3.4	3.6
S05	NeutralHumans_disgust	35	male	90	301.5	5	3.38	1.75	18	21	20	18	5.7	4.6	5.5	1.6	3.7	1.4	1.7	1.2	4.5	2.6	3.2	2.4	3.2	1.7	1.7	1.7	3.6	2.7	2	3.3	3.1	2.3	2.4	2.1	3.8	3.3	2.6	2.8	3.4	1.9	2.1	2	2.1	5.5	1.6	3.4	3.6
S05	NeutralHumans_fear	35	male	90	301.5	5	3.38	1.75	18	21	20	18	5.7	4.6	5.5	1.6	3.7	1.4	1.7	1.2	4.5	2.6	3.2	2.4	3.2	1.7	1.7	1.7	3.6	2.7	2	3.3	3.1	2.3	2.4	2.1	3.8	3.3	2.6	2.8	3.4	1.9	2.1	2	2.1	5.5	1.6	3.4	3.6
S05	NeutralHumans_sadness	35	male	90	301.5	5	3.38	1.75	18	21	20	18	5.7	4.6	5.5	1.6	3.7	1.4	1.7	1.2	4.5	2.6	3.2	2.4	3.2	1.7	1.7	1.7	3.6	2.7	2	3.3	3.1	2.3	2.4	2.1	3.8	3.3	2.6	2.8	3.4	1.9	2.1	2	2.1	5.5	1.6	3.4	3.6
S05	NeutralHumans_valence	35	male	90	301.5	5	3.38	1.75	18	21	20	18	5.7	4.6	5.5	1.6	3.7	1.4	1.7	1.2	4.5	2.6	3.2	2.4	3.2	1.7	1.7	1.7	3.6	2.7	2	3.3	3.1	2.3	2.4	2.1	3.8	3.3	2.6	2.8	3.4	1.9	2.1	2	2.1	5.5	1.6	3.4	3.6
S05	NeutralHumans_anger	35	male	90	301.5	5	3.38	1.75	18	21	20	18	5.7	4.6	5.5	1.6	3.7	1.4	1.7	1.2	4.5	2.6	3.2	2.4	3.2	1.7	1.7	1.7	3.6	2.7	2	3.3	3.1	2.3	2.4	2.1	3.8	3.3	2.6	2.8	3.4	1.9	2.1	2	2.1	5.5	1.6	3.4	3.6
S05	NeutralHumans_surprise	35	male	90	301.5	5	3.38	1.75	18	21	20	18	5.7	4.6	5.5	1.6	3.7	1.4	1.7	1.2	4.5	2.6	3.2	2.4	3.2	1.7	1.7	1.7	3.6	2.7	2	3.3	3.1	2.3	2.4	2.1	3.8	3.3	2.6	2.8	3.4	1.9	2.1	2	2.1	5.5	1.6	3.4	3.6
S05	Object_arousal	35	male	90	301.5	5	3.38	1.75	18	21	20	18	5.7	4.6	5.5	1.6	3.7	1.4	1.7	1.2	4.5	2.6	3.2	2.4	3.2	1.7	1.7	1.7	3.6	2.7	2	3.3	3.1	2.3	2.4	2.1	3.8	3.3	2.6	2.8	3.4	1.9	2.1	2	2.1	5.5	1.6	3.4	3.6
S05	Object_happiness	35	male	90	301.5	5	3.38	1.75	18	21	20	18	5.7	4.6	5.5	1.6	3.7	1.4	1.7	1.2	4.5	2.6	3.2	2.4	3.2	1.7	1.7	1.7	3.6	2.7	2	3.3	3.1	2.3	2.4	2.1	3.8	3.3	2.6	2.8	3.4	1.9	2.1	2	2.1	5.5	1.6	3.4	3.6
S05	Object_disgust	35	male	90	301.5	5	3.38	1.75	18	21	20	18	5.7	4.6	5.5	1.6	3.7	1.4	1.7	1.2	4.5	2.6	3.2	2.4	3.2	1.7	1.7	1.7	3.6	2.7	2	3.3	3.1	2.3	2.4	2.1	3.8	3.3	2.6	2.8	3.4	1.9	2.1	2	2.1	5.5	1.6	3.4	3.6
S05	Object_fear	35	male	90	301.5	5	3.38	1.75	18	21	20	18	5.7	4.6	5.5	1.6	3.7	1.4	1.7	1.2	4.5	2.6	3.2	2.4	3.2	1.7	1.7	1.7	3.6	2.7	2	3.3	3.1	2.3	2.4	2.1	3.8	3.3	2.6	2.8	3.4	1.9	2.1	2	2.1	5.5	1.6	3.4	3.6
S05	Object_sadness	35	male	90	301.5	5	3.38	1.75	18	21	20	18	5.7	4.6	5.5	1.6	3.7	1.4	1.7	1.2	4.5	2.6	3.2	2.4	3.2	1.7	1.7	1.7	3.6	2.7	2	3.3	3.1	2.3	2.4	2.1	3.8	3.3	2.6	2.8	3.4	1.9	2.1	2	2.1	5.5	1.6	3.4	3.6
S05	Object_valence	35	male	90	301.5	5	3.38	1.75	18	21	20	18	5.7	4.6	5.5	1.6	3.7	1.4	1.7	1.2	4.5	2.6	3.2	2.4	3.2	1.7	1.7	1.7	3.6	2.7	2	3.3	3.1	2.3	2.4	2.1	3.8	3.3	2.6	2.8	3.4	1.9	2.1	2	2.1	5.5	1.6	3.4	3.6
S05	Object_anger	35	male	90	301.5	5	3.38	1.75	18	21	20	18	5.7	4.6	5.5	1.6	3.7	1.4	1.7	1.2	4.5	2.6	3.2	2.4	3.2	1.7	1.7	1.7	3.6	2.7	2	3.3	3.1	2.3	2.4	2.1	3.8	3.3	2.6	2.8	3.4	1.9	2.1	2	2.1	5.5	1.6	3.4	3.6
S05	Object_surprise	35	male	90	301.5	5	3.38	1.75	18	21	20	18	5.7	4.6	5.5	1.6	3.7	1.4	1.7	1.2	4.5	2.6	3.2	2.4	3.2	1.7	1.7	1.7	3.6	2.7	2	3.3	3.1	2.3	2.4	2.1	3.8	3.3	2.6	2.8	3.4	1.9	2.1	2	2.1	5.5	1.6	3.4	3.6
S05	Pixel_arousal	35	male	90	301.5	5	3.38	1.75	18	21	20	18	5.7	4.6	5.5	1.6	3.7	1.4	1.7	1.2	4.5	2.6	3.2	2.4	3.2	1.7	1.7	1.7	3.6	2.7	2	3.3	3.1	2.3	2.4	2.1	3.8	3.3	2.6	2.8	3.4	1.9	2.1	2	2.1	5.5	1.6	3.4	3.6
S05	Pixel_happiness	35	male	90	301.5	5	3.38	1.75	18	21	20	18	5.7	4.6	5.5	1.6	3.7	1.4	1.7	1.2	4.5	2.6	3.2	2.4	3.2	1.7	1.7	1.7	3.6	2.7	2	3.3	3.1	2.3	2.4	2.1	3.8	3.3	2.6	2.8	3.4	1.9	2.1	2	2.1	5.5	1.6	3.4	3.6
S05	Pixel_disgust	35	male	90	301.5	5	3.38	1.75	18	21	20	18	5.7	4.6	5.5	1.6	3.7	1.4	1.7	1.2	4.5	2.6	3.2	2.4	3.2	1.7	1.7	1.7	3.6	2.7	2	3.3	3.1	2.3	2.4	2.1	3.8	3.3	2.6	2.8	3.4	1.9	2.1	2	2.1	5.5	1.6	3.4	3.6
S05	Pixel_fear	35	male	90	301.5	5	3.38	1.75	18	21	20	18	5.7	4.6	5.5	1.6	3.7	1.4	1.7	1.2	4.5	2.6	3.2	2.4	3.2	1.7	1.7	1.7	3.6	2.7	2	3.3	3.1	2.3	2.4	2.1	3.8	3.3	2.6	2.8	3.4	1.9	2.1	2	2.1	5.5	1.6	3.4	3.6
S05	Pixel_sadness	35	male	90	301.5	5	3.38	1.75	18	21	20	18	5.7	4.6	5.5	1.6	3.7	1.4	1.7	1.2	4.5	2.6	3.2	2.4	3.2	1.7	1.7	1.7	3.6	2.7	2	3.3	3.1	2.3	2.4	2.1	3.8	3.3	2.6	2.8	3.4	1.9	2.1	2	2.1	5.5	1.6	3.4	3.6
S05	Pixel_valence	35	male	90	301.5	5	3.38	1.75	18	21	20	18	5.7	4.6	5.5	1.6	3.7	1.4	1.7	1.2	4.5	2.6	3.2	2.4	3.2	1.7	1.7	1.7	3.6	2.7	2	3.3	3.1	2.3	2.4	2.1	3.8	3.3	2.6	2.8	3.4	1.9	2.1	2	2.1	5.5	1.6	3.4	3.6
S05	Pixel_anger	35	male	90	301.5	5	3.38	1.75	18	21	20	18	5.7	4.6	5.5	1.6	3.7	1.4	1.7	1.2	4.5	2.6	3.2	2.4	3.2	1.7	1.7	1.7	3.6	2.7	2	3.3	3.1	2.3	2.4	2.1	3.8	3.3	2.6	2.8	3.4	1.9	2.1	2	2.1	5.5	1.6	3.4	3.6
S05	Pixel_surprise	35	male	90	301.5	5	3.38	1.75	18	21	20	18	5.7	4.6	5.5	1.6	3.7	1.4	1.7	1.2	4.5	2.6	3.2	2.4	3.2	1.7	1.7	1.7	3.6	2.7	2	3.3	3.1	2.3	2.4	2.1	3.8	3.3	2.6	2.8	3.4	1.9	2.1	2	2.1	5.5	1.6	3.4	3.6
S06	ThreateningDogs_arousal	30	female	90	144	0	2.38	2.75	20	20	18	13	5.9	4.6	5.9	1	1.4	1	1	1	4.5	2.7	1.9	1.4	2.4	1	1.5	1.1	3.7	2	1.6	1.4	1.2	1.4	1.4	1.5	3.7	1.9	1.1	1.6	1.7	1.1	1.4	1.1	1.7	6	1.1	1	1.4
S06	ThreateningDogs_happiness	30	female	90	144	0	2.38	2.75	20	20	18	13	5.9	4.6	5.9	1	1.4	1	1	1	4.5	2.7	1.9	1.4	2.4	1	1.5	1.1	3.7	2	1.6	1.4	1.2	1.4	1.4	1.5	3.7	1.9	1.1	1.6	1.7	1.1	1.4	1.1	1.7	6	1.1	1	1.4
S06	ThreateningDogs_disgust	30	female	90	144	0	2.38	2.75	20	20	18	13	5.9	4.6	5.9	1	1.4	1	1	1	4.5	2.7	1.9	1.4	2.4	1	1.5	1.1	3.7	2	1.6	1.4	1.2	1.4	1.4	1.5	3.7	1.9	1.1	1.6	1.7	1.1	1.4	1.1	1.7	6	1.1	1	1.4
S06	ThreateningDogs_fear	30	female	90	144	0	2.38	2.75	20	20	18	13	5.9	4.6	5.9	1	1.4	1	1	1	4.5	2.7	1.9	1.4	2.4	1	1.5	1.1	3.7	2	1.6	1.4	1.2	1.4	1.4	1.5	3.7	1.9	1.1	1.6	1.7	1.1	1.4	1.1	1.7	6	1.1	1	1.4
S06	ThreateningDogs_sadness	30	female	90	144	0	2.38	2.75	20	20	18	13	5.9	4.6	5.9	1	1.4	1	1	1	4.5	2.7	1.9	1.4	2.4	1	1.5	1.1	3.7	2	1.6	1.4	1.2	1.4	1.4	1.5	3.7	1.9	1.1	1.6	1.7	1.1	1.4	1.1	1.7	6	1.1	1	1.4
S06	ThreateningDogs_valence	30	female	90	144	0	2.38	2.75	20	20	18	13	5.9	4.6	5.9	1	1.4	1	1	1	4.5	2.7	1.9	1.4	2.4	1	1.5	1.1	3.7	2	1.6	1.4	1.2	1.4	1.4	1.5	3.7	1.9	1.1	1.6	1.7	1.1	1.4	1.1	1.7	6	1.1	1	1.4
S06	ThreateningDogs_anger	30	female	90	144	0	2.38	2.75	20	20	18	13	5.9	4.6	5.9	1	1.4	1	1	1	4.5	2.7	1.9	1.4	2.4	1	1.5	1.1	3.7	2	1.6	1.4	1.2	1.4	1.4	1.5	3.7	1.9	1.1	1.6	1.7	1.1	1.4	1.1	1.7	6	1.1	1	1.4
S06	ThreateningDogs_surprise	30	female	90	144	0	2.38	2.75	20	20	18	13	5.9	4.6	5.9	1	1.4	1	1	1	4.5	2.7	1.9	1.4	2.4	1	1.5	1.1	3.7	2	1.6	1.4	1.2	1.4	1.4	1.5	3.7	1.9	1.1	1.6	1.7	1.1	1.4	1.1	1.7	6	1.1	1	1.4
S06	ThreateningHumans_arousal	30	female	90	144	0	2.38	2.75	20	20	18	13	5.9	4.6	5.9	1	1.4	1	1	1	4.5	2.7	1.9	1.4	2.4	1	1.5	1.1	3.7	2	1.6	1.4	1.2	1.4	1.4	1.5	3.7	1.9	1.1	1.6	1.7	1.1	1.4	1.1	1.7	6	1.1	1	1.4
S06	ThreateningHumans_happiness	30	female	90	144	0	2.38	2.75	20	20	18	13	5.9	4.6	5.9	1	1.4	1	1	1	4.5	2.7	1.9	1.4	2.4	1	1.5	1.1	3.7	2	1.6	1.4	1.2	1.4	1.4	1.5	3.7	1.9	1.1	1.6	1.7	1.1	1.4	1.1	1.7	6	1.1	1	1.4
S06	ThreateningHumans_disgust	30	female	90	144	0	2.38	2.75	20	20	18	13	5.9	4.6	5.9	1	1.4	1	1	1	4.5	2.7	1.9	1.4	2.4	1	1.5	1.1	3.7	2	1.6	1.4	1.2	1.4	1.4	1.5	3.7	1.9	1.1	1.6	1.7	1.1	1.4	1.1	1.7	6	1.1	1	1.4
S06	ThreateningHumans_fear	30	female	90	144	0	2.38	2.75	20	20	18	13	5.9	4.6	5.9	1	1.4	1	1	1	4.5	2.7	1.9	1.4	2.4	1	1.5	1.1	3.7	2	1.6	1.4	1.2	1.4	1.4	1.5	3.7	1.9	1.1	1.6	1.7	1.1	1.4	1.1	1.7	6	1.1	1	1.4
S06	ThreateningHumans_sadness	30	female	90	144	0	2.38	2.75	20	20	18	13	5.9	4.6	5.9	1	1.4	1	1	1	4.5	2.7	1.9	1.4	2.4	1	1.5	1.1	3.7	2	1.6	1.4	1.2	1.4	1.4	1.5	3.7	1.9	1.1	1.6	1.7	1.1	1.4	1.1	1.7	6	1.1	1	1.4
S06	ThreateningHumans_valence	30	female	90	144	0	2.38	2.75	20	20	18	13	5.9	4.6	5.9	1	1.4	1	1	1	4.5	2.7	1.9	1.4	2.4	1	1.5	1.1	3.7	2	1.6	1.4	1.2	1.4	1.4	1.5	3.7	1.9	1.1	1.6	1.7	1.1	1.4	1.1	1.7	6	1.1	1	1.4
S06	ThreateningHumans_anger	30	female	90	144	0	2.38	2.75	20	20	18	13	5.9	4.6	5.9	1	1.4	1	1	1	4.5	2.7	1.9	1.4	2.4	1	1.5	1.1	3.7	2	1.6	1.4	1.2	1.4	1.4	1.5	3.7	1.9	1.1	1.6	1.7	1.1	1.4	1.1	1.7	6	1.1	1	1.4
S06	ThreateningHumans_surprise	30	female	90	144	0	2.38	2.75	20	20	18	13	5.9	4.6	5.9	1	1.4	1	1	1	4.5	2.7	1.9	1.4	2.4	1	1.5	1.1	3.7	2	1.6	1.4	1.2	1.4	1.4	1.5	3.7	1.9	1.1	1.6	1.7	1.1	1.4	1.1	1.7	6	1.1	1	1.4
S06	PleasantDogs_arousal	30	female	90	144	0	2.38	2.75	20	20	18	13	5.9	4.6	5.9	1	1.4	1	1	1	4.5	2.7	1.9	1.4	2.4	1	1.5	1.1	3.7	2	1.6	1.4	1.2	1.4	1.4	1.5	3.7	1.9	1.1	1.6	1.7	1.1	1.4	1.1	1.7	6	1.1	1	1.4
S06	PleasantDogs_happiness	30	female	90	144	0	2.38	2.75	20	20	18	13	5.9	4.6	5.9	1	1.4	1	1	1	4.5	2.7	1.9	1.4	2.4	1	1.5	1.1	3.7	2	1.6	1.4	1.2	1.4	1.4	1.5	3.7	1.9	1.1	1.6	1.7	1.1	1.4	1.1	1.7	6	1.1	1	1.4
S06	PleasantDogs_disgust	30	female	90	144	0	2.38	2.75	20	20	18	13	5.9	4.6	5.9	1	1.4	1	1	1	4.5	2.7	1.9	1.4	2.4	1	1.5	1.1	3.7	2	1.6	1.4	1.2	1.4	1.4	1.5	3.7	1.9	1.1	1.6	1.7	1.1	1.4	1.1	1.7	6	1.1	1	1.4
S06	PleasantDogs_fear	30	female	90	144	0	2.38	2.75	20	20	18	13	5.9	4.6	5.9	1	1.4	1	1	1	4.5	2.7	1.9	1.4	2.4	1	1.5	1.1	3.7	2	1.6	1.4	1.2	1.4	1.4	1.5	3.7	1.9	1.1	1.6	1.7	1.1	1.4	1.1	1.7	6	1.1	1	1.4
S06	PleasantDogs_sadness	30	female	90	144	0	2.38	2.75	20	20	18	13	5.9	4.6	5.9	1	1.4	1	1	1	4.5	2.7	1.9	1.4	2.4	1	1.5	1.1	3.7	2	1.6	1.4	1.2	1.4	1.4	1.5	3.7	1.9	1.1	1.6	1.7	1.1	1.4	1.1	1.7	6	1.1	1	1.4
S06	PleasantDogs_valence	30	female	90	144	0	2.38	2.75	20	20	18	13	5.9	4.6	5.9	1	1.4	1	1	1	4.5	2.7	1.9	1.4	2.4	1	1.5	1.1	3.7	2	1.6	1.4	1.2	1.4	1.4	1.5	3.7	1.9	1.1	1.6	1.7	1.1	1.4	1.1	1.7	6	1.1	1	1.4
S06	PleasantDogs_anger	30	female	90	144	0	2.38	2.75	20	20	18	13	5.9	4.6	5.9	1	1.4	1	1	1	4.5	2.7	1.9	1.4	2.4	1	1.5	1.1	3.7	2	1.6	1.4	1.2	1.4	1.4	1.5	3.7	1.9	1.1	1.6	1.7	1.1	1.4	1.1	1.7	6	1.1	1	1.4
S06	PleasantDogs_surprise	30	female	90	144	0	2.38	2.75	20	20	18	13	5.9	4.6	5.9	1	1.4	1	1	1	4.5	2.7	1.9	1.4	2.4	1	1.5	1.1	3.7	2	1.6	1.4	1.2	1.4	1.4	1.5	3.7	1.9	1.1	1.6	1.7	1.1	1.4	1.1	1.7	6	1.1	1	1.4
S06	PleasantHumans_arousal	30	female	90	144	0	2.38	2.75	20	20	18	13	5.9	4.6	5.9	1	1.4	1	1	1	4.5	2.7	1.9	1.4	2.4	1	1.5	1.1	3.7	2	1.6	1.4	1.2	1.4	1.4	1.5	3.7	1.9	1.1	1.6	1.7	1.1	1.4	1.1	1.7	6	1.1	1	1.4
S06	PleasantHumans_happiness	30	female	90	144	0	2.38	2.75	20	20	18	13	5.9	4.6	5.9	1	1.4	1	1	1	4.5	2.7	1.9	1.4	2.4	1	1.5	1.1	3.7	2	1.6	1.4	1.2	1.4	1.4	1.5	3.7	1.9	1.1	1.6	1.7	1.1	1.4	1.1	1.7	6	1.1	1	1.4
S06	PleasantHumans_disgust	30	female	90	144	0	2.38	2.75	20	20	18	13	5.9	4.6	5.9	1	1.4	1	1	1	4.5	2.7	1.9	1.4	2.4	1	1.5	1.1	3.7	2	1.6	1.4	1.2	1.4	1.4	1.5	3.7	1.9	1.1	1.6	1.7	1.1	1.4	1.1	1.7	6	1.1	1	1.4
S06	PleasantHumans_fear	30	female	90	144	0	2.38	2.75	20	20	18	13	5.9	4.6	5.9	1	1.4	1	1	1	4.5	2.7	1.9	1.4	2.4	1	1.5	1.1	3.7	2	1.6	1.4	1.2	1.4	1.4	1.5	3.7	1.9	1.1	1.6	1.7	1.1	1.4	1.1	1.7	6	1.1	1	1.4
S06	PleasantHumans_sadness	30	female	90	144	0	2.38	2.75	20	20	18	13	5.9	4.6	5.9	1	1.4	1	1	1	4.5	2.7	1.9	1.4	2.4	1	1.5	1.1	3.7	2	1.6	1.4	1.2	1.4	1.4	1.5	3.7	1.9	1.1	1.6	1.7	1.1	1.4	1.1	1.7	6	1.1	1	1.4
S06	PleasantHumans_valence	30	female	90	144	0	2.38	2.75	20	20	18	13	5.9	4.6	5.9	1	1.4	1	1	1	4.5	2.7	1.9	1.4	2.4	1	1.5	1.1	3.7	2	1.6	1.4	1.2	1.4	1.4	1.5	3.7	1.9	1.1	1.6	1.7	1.1	1.4	1.1	1.7	6	1.1	1	1.4
S06	PleasantHumans_anger	30	female	90	144	0	2.38	2.75	20	20	18	13	5.9	4.6	5.9	1	1.4	1	1	1	4.5	2.7	1.9	1.4	2.4	1	1.5	1.1	3.7	2	1.6	1.4	1.2	1.4	1.4	1.5	3.7	1.9	1.1	1.6	1.7	1.1	1.4	1.1	1.7	6	1.1	1	1.4
S06	PleasantHumans_surprise	30	female	90	144	0	2.38	2.75	20	20	18	13	5.9	4.6	5.9	1	1.4	1	1	1	4.5	2.7	1.9	1.4	2.4	1	1.5	1.1	3.7	2	1.6	1.4	1.2	1.4	1.4	1.5	3.7	1.9	1.1	1.6	1.7	1.1	1.4	1.1	1.7	6	1.1	1	1.4
S06	NeutralDogs_arousal	30	female	90	144	0	2.38	2.75	20	20	18	13	5.9	4.6	5.9	1	1.4	1	1	1	4.5	2.7	1.9	1.4	2.4	1	1.5	1.1	3.7	2	1.6	1.4	1.2	1.4	1.4	1.5	3.7	1.9	1.1	1.6	1.7	1.1	1.4	1.1	1.7	6	1.1	1	1.4
S06	NeutralDogs_happiness	30	female	90	144	0	2.38	2.75	20	20	18	13	5.9	4.6	5.9	1	1.4	1	1	1	4.5	2.7	1.9	1.4	2.4	1	1.5	1.1	3.7	2	1.6	1.4	1.2	1.4	1.4	1.5	3.7	1.9	1.1	1.6	1.7	1.1	1.4	1.1	1.7	6	1.1	1	1.4
S06	NeutralDogs_disgust	30	female	90	144	0	2.38	2.75	20	20	18	13	5.9	4.6	5.9	1	1.4	1	1	1	4.5	2.7	1.9	1.4	2.4	1	1.5	1.1	3.7	2	1.6	1.4	1.2	1.4	1.4	1.5	3.7	1.9	1.1	1.6	1.7	1.1	1.4	1.1	1.7	6	1.1	1	1.4
S06	NeutralDogs_fear	30	female	90	144	0	2.38	2.75	20	20	18	13	5.9	4.6	5.9	1	1.4	1	1	1	4.5	2.7	1.9	1.4	2.4	1	1.5	1.1	3.7	2	1.6	1.4	1.2	1.4	1.4	1.5	3.7	1.9	1.1	1.6	1.7	1.1	1.4	1.1	1.7	6	1.1	1	1.4
S06	NeutralDogs_sadness	30	female	90	144	0	2.38	2.75	20	20	18	13	5.9	4.6	5.9	1	1.4	1	1	1	4.5	2.7	1.9	1.4	2.4	1	1.5	1.1	3.7	2	1.6	1.4	1.2	1.4	1.4	1.5	3.7	1.9	1.1	1.6	1.7	1.1	1.4	1.1	1.7	6	1.1	1	1.4
S06	NeutralDogs_valence	30	female	90	144	0	2.38	2.75	20	20	18	13	5.9	4.6	5.9	1	1.4	1	1	1	4.5	2.7	1.9	1.4	2.4	1	1.5	1.1	3.7	2	1.6	1.4	1.2	1.4	1.4	1.5	3.7	1.9	1.1	1.6	1.7	1.1	1.4	1.1	1.7	6	1.1	1	1.4
S06	NeutralDogs_anger	30	female	90	144	0	2.38	2.75	20	20	18	13	5.9	4.6	5.9	1	1.4	1	1	1	4.5	2.7	1.9	1.4	2.4	1	1.5	1.1	3.7	2	1.6	1.4	1.2	1.4	1.4	1.5	3.7	1.9	1.1	1.6	1.7	1.1	1.4	1.1	1.7	6	1.1	1	1.4
S06	NeutralDogs_surprise	30	female	90	144	0	2.38	2.75	20	20	18	13	5.9	4.6	5.9	1	1.4	1	1	1	4.5	2.7	1.9	1.4	2.4	1	1.5	1.1	3.7	2	1.6	1.4	1.2	1.4	1.4	1.5	3.7	1.9	1.1	1.6	1.7	1.1	1.4	1.1	1.7	6	1.1	1	1.4
S06	NeutralHumans_arousal	30	female	90	144	0	2.38	2.75	20	20	18	13	5.9	4.6	5.9	1	1.4	1	1	1	4.5	2.7	1.9	1.4	2.4	1	1.5	1.1	3.7	2	1.6	1.4	1.2	1.4	1.4	1.5	3.7	1.9	1.1	1.6	1.7	1.1	1.4	1.1	1.7	6	1.1	1	1.4
S06	NeutralHumans_happiness	30	female	90	144	0	2.38	2.75	20	20	18	13	5.9	4.6	5.9	1	1.4	1	1	1	4.5	2.7	1.9	1.4	2.4	1	1.5	1.1	3.7	2	1.6	1.4	1.2	1.4	1.4	1.5	3.7	1.9	1.1	1.6	1.7	1.1	1.4	1.1	1.7	6	1.1	1	1.4
S06	NeutralHumans_disgust	30	female	90	144	0	2.38	2.75	20	20	18	13	5.9	4.6	5.9	1	1.4	1	1	1	4.5	2.7	1.9	1.4	2.4	1	1.5	1.1	3.7	2	1.6	1.4	1.2	1.4	1.4	1.5	3.7	1.9	1.1	1.6	1.7	1.1	1.4	1.1	1.7	6	1.1	1	1.4
S06	NeutralHumans_fear	30	female	90	144	0	2.38	2.75	20	20	18	13	5.9	4.6	5.9	1	1.4	1	1	1	4.5	2.7	1.9	1.4	2.4	1	1.5	1.1	3.7	2	1.6	1.4	1.2	1.4	1.4	1.5	3.7	1.9	1.1	1.6	1.7	1.1	1.4	1.1	1.7	6	1.1	1	1.4
S06	NeutralHumans_sadness	30	female	90	144	0	2.38	2.75	20	20	18	13	5.9	4.6	5.9	1	1.4	1	1	1	4.5	2.7	1.9	1.4	2.4	1	1.5	1.1	3.7	2	1.6	1.4	1.2	1.4	1.4	1.5	3.7	1.9	1.1	1.6	1.7	1.1	1.4	1.1	1.7	6	1.1	1	1.4
S06	NeutralHumans_valence	30	female	90	144	0	2.38	2.75	20	20	18	13	5.9	4.6	5.9	1	1.4	1	1	1	4.5	2.7	1.9	1.4	2.4	1	1.5	1.1	3.7	2	1.6	1.4	1.2	1.4	1.4	1.5	3.7	1.9	1.1	1.6	1.7	1.1	1.4	1.1	1.7	6	1.1	1	1.4
S06	NeutralHumans_anger	30	female	90	144	0	2.38	2.75	20	20	18	13	5.9	4.6	5.9	1	1.4	1	1	1	4.5	2.7	1.9	1.4	2.4	1	1.5	1.1	3.7	2	1.6	1.4	1.2	1.4	1.4	1.5	3.7	1.9	1.1	1.6	1.7	1.1	1.4	1.1	1.7	6	1.1	1	1.4
S06	NeutralHumans_surprise	30	female	90	144	0	2.38	2.75	20	20	18	13	5.9	4.6	5.9	1	1.4	1	1	1	4.5	2.7	1.9	1.4	2.4	1	1.5	1.1	3.7	2	1.6	1.4	1.2	1.4	1.4	1.5	3.7	1.9	1.1	1.6	1.7	1.1	1.4	1.1	1.7	6	1.1	1	1.4
S06	Object_arousal	30	female	90	144	0	2.38	2.75	20	20	18	13	5.9	4.6	5.9	1	1.4	1	1	1	4.5	2.7	1.9	1.4	2.4	1	1.5	1.1	3.7	2	1.6	1.4	1.2	1.4	1.4	1.5	3.7	1.9	1.1	1.6	1.7	1.1	1.4	1.1	1.7	6	1.1	1	1.4
S06	Object_happiness	30	female	90	144	0	2.38	2.75	20	20	18	13	5.9	4.6	5.9	1	1.4	1	1	1	4.5	2.7	1.9	1.4	2.4	1	1.5	1.1	3.7	2	1.6	1.4	1.2	1.4	1.4	1.5	3.7	1.9	1.1	1.6	1.7	1.1	1.4	1.1	1.7	6	1.1	1	1.4
S06	Object_disgust	30	female	90	144	0	2.38	2.75	20	20	18	13	5.9	4.6	5.9	1	1.4	1	1	1	4.5	2.7	1.9	1.4	2.4	1	1.5	1.1	3.7	2	1.6	1.4	1.2	1.4	1.4	1.5	3.7	1.9	1.1	1.6	1.7	1.1	1.4	1.1	1.7	6	1.1	1	1.4
S06	Object_fear	30	female	90	144	0	2.38	2.75	20	20	18	13	5.9	4.6	5.9	1	1.4	1	1	1	4.5	2.7	1.9	1.4	2.4	1	1.5	1.1	3.7	2	1.6	1.4	1.2	1.4	1.4	1.5	3.7	1.9	1.1	1.6	1.7	1.1	1.4	1.1	1.7	6	1.1	1	1.4
S06	Object_sadness	30	female	90	144	0	2.38	2.75	20	20	18	13	5.9	4.6	5.9	1	1.4	1	1	1	4.5	2.7	1.9	1.4	2.4	1	1.5	1.1	3.7	2	1.6	1.4	1.2	1.4	1.4	1.5	3.7	1.9	1.1	1.6	1.7	1.1	1.4	1.1	1.7	6	1.1	1	1.4
S06	Object_valence	30	female	90	144	0	2.38	2.75	20	20	18	13	5.9	4.6	5.9	1	1.4	1	1	1	4.5	2.7	1.9	1.4	2.4	1	1.5	1.1	3.7	2	1.6	1.4	1.2	1.4	1.4	1.5	3.7	1.9	1.1	1.6	1.7	1.1	1.4	1.1	1.7	6	1.1	1	1.4
S06	Object_anger	30	female	90	144	0	2.38	2.75	20	20	18	13	5.9	4.6	5.9	1	1.4	1	1	1	4.5	2.7	1.9	1.4	2.4	1	1.5	1.1	3.7	2	1.6	1.4	1.2	1.4	1.4	1.5	3.7	1.9	1.1	1.6	1.7	1.1	1.4	1.1	1.7	6	1.1	1	1.4
S06	Object_surprise	30	female	90	144	0	2.38	2.75	20	20	18	13	5.9	4.6	5.9	1	1.4	1	1	1	4.5	2.7	1.9	1.4	2.4	1	1.5	1.1	3.7	2	1.6	1.4	1.2	1.4	1.4	1.5	3.7	1.9	1.1	1.6	1.7	1.1	1.4	1.1	1.7	6	1.1	1	1.4
S06	Pixel_arousal	30	female	90	144	0	2.38	2.75	20	20	18	13	5.9	4.6	5.9	1	1.4	1	1	1	4.5	2.7	1.9	1.4	2.4	1	1.5	1.1	3.7	2	1.6	1.4	1.2	1.4	1.4	1.5	3.7	1.9	1.1	1.6	1.7	1.1	1.4	1.1	1.7	6	1.1	1	1.4
S06	Pixel_happiness	30	female	90	144	0	2.38	2.75	20	20	18	13	5.9	4.6	5.9	1	1.4	1	1	1	4.5	2.7	1.9	1.4	2.4	1	1.5	1.1	3.7	2	1.6	1.4	1.2	1.4	1.4	1.5	3.7	1.9	1.1	1.6	1.7	1.1	1.4	1.1	1.7	6	1.1	1	1.4
S06	Pixel_disgust	30	female	90	144	0	2.38	2.75	20	20	18	13	5.9	4.6	5.9	1	1.4	1	1	1	4.5	2.7	1.9	1.4	2.4	1	1.5	1.1	3.7	2	1.6	1.4	1.2	1.4	1.4	1.5	3.7	1.9	1.1	1.6	1.7	1.1	1.4	1.1	1.7	6	1.1	1	1.4
S06	Pixel_fear	30	female	90	144	0	2.38	2.75	20	20	18	13	5.9	4.6	5.9	1	1.4	1	1	1	4.5	2.7	1.9	1.4	2.4	1	1.5	1.1	3.7	2	1.6	1.4	1.2	1.4	1.4	1.5	3.7	1.9	1.1	1.6	1.7	1.1	1.4	1.1	1.7	6	1.1	1	1.4
S06	Pixel_sadness	30	female	90	144	0	2.38	2.75	20	20	18	13	5.9	4.6	5.9	1	1.4	1	1	1	4.5	2.7	1.9	1.4	2.4	1	1.5	1.1	3.7	2	1.6	1.4	1.2	1.4	1.4	1.5	3.7	1.9	1.1	1.6	1.7	1.1	1.4	1.1	1.7	6	1.1	1	1.4
S06	Pixel_valence	30	female	90	144	0	2.38	2.75	20	20	18	13	5.9	4.6	5.9	1	1.4	1	1	1	4.5	2.7	1.9	1.4	2.4	1	1.5	1.1	3.7	2	1.6	1.4	1.2	1.4	1.4	1.5	3.7	1.9	1.1	1.6	1.7	1.1	1.4	1.1	1.7	6	1.1	1	1.4
S06	Pixel_anger	30	female	90	144	0	2.38	2.75	20	20	18	13	5.9	4.6	5.9	1	1.4	1	1	1	4.5	2.7	1.9	1.4	2.4	1	1.5	1.1	3.7	2	1.6	1.4	1.2	1.4	1.4	1.5	3.7	1.9	1.1	1.6	1.7	1.1	1.4	1.1	1.7	6	1.1	1	1.4
S06	Pixel_surprise	30	female	90	144	0	2.38	2.75	20	20	18	13	5.9	4.6	5.9	1	1.4	1	1	1	4.5	2.7	1.9	1.4	2.4	1	1.5	1.1	3.7	2	1.6	1.4	1.2	1.4	1.4	1.5	3.7	1.9	1.1	1.6	1.7	1.1	1.4	1.1	1.7	6	1.1	1	1.4
S07	ThreateningDogs_arousal	34	female	100	480	16	3	4	9	15	19	25	5.3	2.6	3.7	1	1	1	1	1	4.8	2.1	2.7	1	1.4	1	1	1	3.8	1.4	1.2	1.4	1	1	1.1	1.2	4	1.2	1	1	1.2	1	1.1	1	2.6	2.5	1	1	1
S07	ThreateningDogs_happiness	34	female	100	480	16	3	4	9	15	19	25	5.3	2.6	3.7	1	1	1	1	1	4.8	2.1	2.7	1	1.4	1	1	1	3.8	1.4	1.2	1.4	1	1	1.1	1.2	4	1.2	1	1	1.2	1	1.1	1	2.6	2.5	1	1	1
S07	ThreateningDogs_disgust	34	female	100	480	16	3	4	9	15	19	25	5.3	2.6	3.7	1	1	1	1	1	4.8	2.1	2.7	1	1.4	1	1	1	3.8	1.4	1.2	1.4	1	1	1.1	1.2	4	1.2	1	1	1.2	1	1.1	1	2.6	2.5	1	1	1
S07	ThreateningDogs_fear	34	female	100	480	16	3	4	9	15	19	25	5.3	2.6	3.7	1	1	1	1	1	4.8	2.1	2.7	1	1.4	1	1	1	3.8	1.4	1.2	1.4	1	1	1.1	1.2	4	1.2	1	1	1.2	1	1.1	1	2.6	2.5	1	1	1
S07	ThreateningDogs_sadness	34	female	100	480	16	3	4	9	15	19	25	5.3	2.6	3.7	1	1	1	1	1	4.8	2.1	2.7	1	1.4	1	1	1	3.8	1.4	1.2	1.4	1	1	1.1	1.2	4	1.2	1	1	1.2	1	1.1	1	2.6	2.5	1	1	1
S07	ThreateningDogs_valence	34	female	100	480	16	3	4	9	15	19	25	5.3	2.6	3.7	1	1	1	1	1	4.8	2.1	2.7	1	1.4	1	1	1	3.8	1.4	1.2	1.4	1	1	1.1	1.2	4	1.2	1	1	1.2	1	1.1	1	2.6	2.5	1	1	1
S07	ThreateningDogs_anger	34	female	100	480	16	3	4	9	15	19	25	5.3	2.6	3.7	1	1	1	1	1	4.8	2.1	2.7	1	1.4	1	1	1	3.8	1.4	1.2	1.4	1	1	1.1	1.2	4	1.2	1	1	1.2	1	1.1	1	2.6	2.5	1	1	1
S07	ThreateningDogs_surprise	34	female	100	480	16	3	4	9	15	19	25	5.3	2.6	3.7	1	1	1	1	1	4.8	2.1	2.7	1	1.4	1	1	1	3.8	1.4	1.2	1.4	1	1	1.1	1.2	4	1.2	1	1	1.2	1	1.1	1	2.6	2.5	1	1	1
S07	ThreateningHumans_arousal	34	female	100	480	16	3	4	9	15	19	25	5.3	2.6	3.7	1	1	1	1	1	4.8	2.1	2.7	1	1.4	1	1	1	3.8	1.4	1.2	1.4	1	1	1.1	1.2	4	1.2	1	1	1.2	1	1.1	1	2.6	2.5	1	1	1
S07	ThreateningHumans_happiness	34	female	100	480	16	3	4	9	15	19	25	5.3	2.6	3.7	1	1	1	1	1	4.8	2.1	2.7	1	1.4	1	1	1	3.8	1.4	1.2	1.4	1	1	1.1	1.2	4	1.2	1	1	1.2	1	1.1	1	2.6	2.5	1	1	1
S07	ThreateningHumans_disgust	34	female	100	480	16	3	4	9	15	19	25	5.3	2.6	3.7	1	1	1	1	1	4.8	2.1	2.7	1	1.4	1	1	1	3.8	1.4	1.2	1.4	1	1	1.1	1.2	4	1.2	1	1	1.2	1	1.1	1	2.6	2.5	1	1	1
S07	ThreateningHumans_fear	34	female	100	480	16	3	4	9	15	19	25	5.3	2.6	3.7	1	1	1	1	1	4.8	2.1	2.7	1	1.4	1	1	1	3.8	1.4	1.2	1.4	1	1	1.1	1.2	4	1.2	1	1	1.2	1	1.1	1	2.6	2.5	1	1	1
S07	ThreateningHumans_sadness	34	female	100	480	16	3	4	9	15	19	25	5.3	2.6	3.7	1	1	1	1	1	4.8	2.1	2.7	1	1.4	1	1	1	3.8	1.4	1.2	1.4	1	1	1.1	1.2	4	1.2	1	1	1.2	1	1.1	1	2.6	2.5	1	1	1
S07	ThreateningHumans_valence	34	female	100	480	16	3	4	9	15	19	25	5.3	2.6	3.7	1	1	1	1	1	4.8	2.1	2.7	1	1.4	1	1	1	3.8	1.4	1.2	1.4	1	1	1.1	1.2	4	1.2	1	1	1.2	1	1.1	1	2.6	2.5	1	1	1
S07	ThreateningHumans_anger	34	female	100	480	16	3	4	9	15	19	25	5.3	2.6	3.7	1	1	1	1	1	4.8	2.1	2.7	1	1.4	1	1	1	3.8	1.4	1.2	1.4	1	1	1.1	1.2	4	1.2	1	1	1.2	1	1.1	1	2.6	2.5	1	1	1
S07	ThreateningHumans_surprise	34	female	100	480	16	3	4	9	15	19	25	5.3	2.6	3.7	1	1	1	1	1	4.8	2.1	2.7	1	1.4	1	1	1	3.8	1.4	1.2	1.4	1	1	1.1	1.2	4	1.2	1	1	1.2	1	1.1	1	2.6	2.5	1	1	1
S07	PleasantDogs_arousal	34	female	100	480	16	3	4	9	15	19	25	5.3	2.6	3.7	1	1	1	1	1	4.8	2.1	2.7	1	1.4	1	1	1	3.8	1.4	1.2	1.4	1	1	1.1	1.2	4	1.2	1	1	1.2	1	1.1	1	2.6	2.5	1	1	1
S07	PleasantDogs_happiness	34	female	100	480	16	3	4	9	15	19	25	5.3	2.6	3.7	1	1	1	1	1	4.8	2.1	2.7	1	1.4	1	1	1	3.8	1.4	1.2	1.4	1	1	1.1	1.2	4	1.2	1	1	1.2	1	1.1	1	2.6	2.5	1	1	1
S07	PleasantDogs_disgust	34	female	100	480	16	3	4	9	15	19	25	5.3	2.6	3.7	1	1	1	1	1	4.8	2.1	2.7	1	1.4	1	1	1	3.8	1.4	1.2	1.4	1	1	1.1	1.2	4	1.2	1	1	1.2	1	1.1	1	2.6	2.5	1	1	1
S07	PleasantDogs_fear	34	female	100	480	16	3	4	9	15	19	25	5.3	2.6	3.7	1	1	1	1	1	4.8	2.1	2.7	1	1.4	1	1	1	3.8	1.4	1.2	1.4	1	1	1.1	1.2	4	1.2	1	1	1.2	1	1.1	1	2.6	2.5	1	1	1
S07	PleasantDogs_sadness	34	female	100	480	16	3	4	9	15	19	25	5.3	2.6	3.7	1	1	1	1	1	4.8	2.1	2.7	1	1.4	1	1	1	3.8	1.4	1.2	1.4	1	1	1.1	1.2	4	1.2	1	1	1.2	1	1.1	1	2.6	2.5	1	1	1
S07	PleasantDogs_valence	34	female	100	480	16	3	4	9	15	19	25	5.3	2.6	3.7	1	1	1	1	1	4.8	2.1	2.7	1	1.4	1	1	1	3.8	1.4	1.2	1.4	1	1	1.1	1.2	4	1.2	1	1	1.2	1	1.1	1	2.6	2.5	1	1	1
S07	PleasantDogs_anger	34	female	100	480	16	3	4	9	15	19	25	5.3	2.6	3.7	1	1	1	1	1	4.8	2.1	2.7	1	1.4	1	1	1	3.8	1.4	1.2	1.4	1	1	1.1	1.2	4	1.2	1	1	1.2	1	1.1	1	2.6	2.5	1	1	1
S07	PleasantDogs_surprise	34	female	100	480	16	3	4	9	15	19	25	5.3	2.6	3.7	1	1	1	1	1	4.8	2.1	2.7	1	1.4	1	1	1	3.8	1.4	1.2	1.4	1	1	1.1	1.2	4	1.2	1	1	1.2	1	1.1	1	2.6	2.5	1	1	1
S07	PleasantHumans_arousal	34	female	100	480	16	3	4	9	15	19	25	5.3	2.6	3.7	1	1	1	1	1	4.8	2.1	2.7	1	1.4	1	1	1	3.8	1.4	1.2	1.4	1	1	1.1	1.2	4	1.2	1	1	1.2	1	1.1	1	2.6	2.5	1	1	1
S07	PleasantHumans_happiness	34	female	100	480	16	3	4	9	15	19	25	5.3	2.6	3.7	1	1	1	1	1	4.8	2.1	2.7	1	1.4	1	1	1	3.8	1.4	1.2	1.4	1	1	1.1	1.2	4	1.2	1	1	1.2	1	1.1	1	2.6	2.5	1	1	1
S07	PleasantHumans_disgust	34	female	100	480	16	3	4	9	15	19	25	5.3	2.6	3.7	1	1	1	1	1	4.8	2.1	2.7	1	1.4	1	1	1	3.8	1.4	1.2	1.4	1	1	1.1	1.2	4	1.2	1	1	1.2	1	1.1	1	2.6	2.5	1	1	1
S07	PleasantHumans_fear	34	female	100	480	16	3	4	9	15	19	25	5.3	2.6	3.7	1	1	1	1	1	4.8	2.1	2.7	1	1.4	1	1	1	3.8	1.4	1.2	1.4	1	1	1.1	1.2	4	1.2	1	1	1.2	1	1.1	1	2.6	2.5	1	1	1
S07	PleasantHumans_sadness	34	female	100	480	16	3	4	9	15	19	25	5.3	2.6	3.7	1	1	1	1	1	4.8	2.1	2.7	1	1.4	1	1	1	3.8	1.4	1.2	1.4	1	1	1.1	1.2	4	1.2	1	1	1.2	1	1.1	1	2.6	2.5	1	1	1
S07	PleasantHumans_valence	34	female	100	480	16	3	4	9	15	19	25	5.3	2.6	3.7	1	1	1	1	1	4.8	2.1	2.7	1	1.4	1	1	1	3.8	1.4	1.2	1.4	1	1	1.1	1.2	4	1.2	1	1	1.2	1	1.1	1	2.6	2.5	1	1	1
S07	PleasantHumans_anger	34	female	100	480	16	3	4	9	15	19	25	5.3	2.6	3.7	1	1	1	1	1	4.8	2.1	2.7	1	1.4	1	1	1	3.8	1.4	1.2	1.4	1	1	1.1	1.2	4	1.2	1	1	1.2	1	1.1	1	2.6	2.5	1	1	1
S07	PleasantHumans_surprise	34	female	100	480	16	3	4	9	15	19	25	5.3	2.6	3.7	1	1	1	1	1	4.8	2.1	2.7	1	1.4	1	1	1	3.8	1.4	1.2	1.4	1	1	1.1	1.2	4	1.2	1	1	1.2	1	1.1	1	2.6	2.5	1	1	1
S07	NeutralDogs_arousal	34	female	100	480	16	3	4	9	15	19	25	5.3	2.6	3.7	1	1	1	1	1	4.8	2.1	2.7	1	1.4	1	1	1	3.8	1.4	1.2	1.4	1	1	1.1	1.2	4	1.2	1	1	1.2	1	1.1	1	2.6	2.5	1	1	1
S07	NeutralDogs_happiness	34	female	100	480	16	3	4	9	15	19	25	5.3	2.6	3.7	1	1	1	1	1	4.8	2.1	2.7	1	1.4	1	1	1	3.8	1.4	1.2	1.4	1	1	1.1	1.2	4	1.2	1	1	1.2	1	1.1	1	2.6	2.5	1	1	1
S07	NeutralDogs_disgust	34	female	100	480	16	3	4	9	15	19	25	5.3	2.6	3.7	1	1	1	1	1	4.8	2.1	2.7	1	1.4	1	1	1	3.8	1.4	1.2	1.4	1	1	1.1	1.2	4	1.2	1	1	1.2	1	1.1	1	2.6	2.5	1	1	1
S07	NeutralDogs_fear	34	female	100	480	16	3	4	9	15	19	25	5.3	2.6	3.7	1	1	1	1	1	4.8	2.1	2.7	1	1.4	1	1	1	3.8	1.4	1.2	1.4	1	1	1.1	1.2	4	1.2	1	1	1.2	1	1.1	1	2.6	2.5	1	1	1
S07	NeutralDogs_sadness	34	female	100	480	16	3	4	9	15	19	25	5.3	2.6	3.7	1	1	1	1	1	4.8	2.1	2.7	1	1.4	1	1	1	3.8	1.4	1.2	1.4	1	1	1.1	1.2	4	1.2	1	1	1.2	1	1.1	1	2.6	2.5	1	1	1
S07	NeutralDogs_valence	34	female	100	480	16	3	4	9	15	19	25	5.3	2.6	3.7	1	1	1	1	1	4.8	2.1	2.7	1	1.4	1	1	1	3.8	1.4	1.2	1.4	1	1	1.1	1.2	4	1.2	1	1	1.2	1	1.1	1	2.6	2.5	1	1	1
S07	NeutralDogs_anger	34	female	100	480	16	3	4	9	15	19	25	5.3	2.6	3.7	1	1	1	1	1	4.8	2.1	2.7	1	1.4	1	1	1	3.8	1.4	1.2	1.4	1	1	1.1	1.2	4	1.2	1	1	1.2	1	1.1	1	2.6	2.5	1	1	1
S07	NeutralDogs_surprise	34	female	100	480	16	3	4	9	15	19	25	5.3	2.6	3.7	1	1	1	1	1	4.8	2.1	2.7	1	1.4	1	1	1	3.8	1.4	1.2	1.4	1	1	1.1	1.2	4	1.2	1	1	1.2	1	1.1	1	2.6	2.5	1	1	1
S07	NeutralHumans_arousal	34	female	100	480	16	3	4	9	15	19	25	5.3	2.6	3.7	1	1	1	1	1	4.8	2.1	2.7	1	1.4	1	1	1	3.8	1.4	1.2	1.4	1	1	1.1	1.2	4	1.2	1	1	1.2	1	1.1	1	2.6	2.5	1	1	1
S07	NeutralHumans_happiness	34	female	100	480	16	3	4	9	15	19	25	5.3	2.6	3.7	1	1	1	1	1	4.8	2.1	2.7	1	1.4	1	1	1	3.8	1.4	1.2	1.4	1	1	1.1	1.2	4	1.2	1	1	1.2	1	1.1	1	2.6	2.5	1	1	1
S07	NeutralHumans_disgust	34	female	100	480	16	3	4	9	15	19	25	5.3	2.6	3.7	1	1	1	1	1	4.8	2.1	2.7	1	1.4	1	1	1	3.8	1.4	1.2	1.4	1	1	1.1	1.2	4	1.2	1	1	1.2	1	1.1	1	2.6	2.5	1	1	1
S07	NeutralHumans_fear	34	female	100	480	16	3	4	9	15	19	25	5.3	2.6	3.7	1	1	1	1	1	4.8	2.1	2.7	1	1.4	1	1	1	3.8	1.4	1.2	1.4	1	1	1.1	1.2	4	1.2	1	1	1.2	1	1.1	1	2.6	2.5	1	1	1
S07	NeutralHumans_sadness	34	female	100	480	16	3	4	9	15	19	25	5.3	2.6	3.7	1	1	1	1	1	4.8	2.1	2.7	1	1.4	1	1	1	3.8	1.4	1.2	1.4	1	1	1.1	1.2	4	1.2	1	1	1.2	1	1.1	1	2.6	2.5	1	1	1
S07	NeutralHumans_valence	34	female	100	480	16	3	4	9	15	19	25	5.3	2.6	3.7	1	1	1	1	1	4.8	2.1	2.7	1	1.4	1	1	1	3.8	1.4	1.2	1.4	1	1	1.1	1.2	4	1.2	1	1	1.2	1	1.1	1	2.6	2.5	1	1	1
S07	NeutralHumans_anger	34	female	100	480	16	3	4	9	15	19	25	5.3	2.6	3.7	1	1	1	1	1	4.8	2.1	2.7	1	1.4	1	1	1	3.8	1.4	1.2	1.4	1	1	1.1	1.2	4	1.2	1	1	1.2	1	1.1	1	2.6	2.5	1	1	1
S07	NeutralHumans_surprise	34	female	100	480	16	3	4	9	15	19	25	5.3	2.6	3.7	1	1	1	1	1	4.8	2.1	2.7	1	1.4	1	1	1	3.8	1.4	1.2	1.4	1	1	1.1	1.2	4	1.2	1	1	1.2	1	1.1	1	2.6	2.5	1	1	1
S07	Object_arousal	34	female	100	480	16	3	4	9	15	19	25	5.3	2.6	3.7	1	1	1	1	1	4.8	2.1	2.7	1	1.4	1	1	1	3.8	1.4	1.2	1.4	1	1	1.1	1.2	4	1.2	1	1	1.2	1	1.1	1	2.6	2.5	1	1	1
S07	Object_happiness	34	female	100	480	16	3	4	9	15	19	25	5.3	2.6	3.7	1	1	1	1	1	4.8	2.1	2.7	1	1.4	1	1	1	3.8	1.4	1.2	1.4	1	1	1.1	1.2	4	1.2	1	1	1.2	1	1.1	1	2.6	2.5	1	1	1
S07	Object_disgust	34	female	100	480	16	3	4	9	15	19	25	5.3	2.6	3.7	1	1	1	1	1	4.8	2.1	2.7	1	1.4	1	1	1	3.8	1.4	1.2	1.4	1	1	1.1	1.2	4	1.2	1	1	1.2	1	1.1	1	2.6	2.5	1	1	1
S07	Object_fear	34	female	100	480	16	3	4	9	15	19	25	5.3	2.6	3.7	1	1	1	1	1	4.8	2.1	2.7	1	1.4	1	1	1	3.8	1.4	1.2	1.4	1	1	1.1	1.2	4	1.2	1	1	1.2	1	1.1	1	2.6	2.5	1	1	1
S07	Object_sadness	34	female	100	480	16	3	4	9	15	19	25	5.3	2.6	3.7	1	1	1	1	1	4.8	2.1	2.7	1	1.4	1	1	1	3.8	1.4	1.2	1.4	1	1	1.1	1.2	4	1.2	1	1	1.2	1	1.1	1	2.6	2.5	1	1	1
S07	Object_valence	34	female	100	480	16	3	4	9	15	19	25	5.3	2.6	3.7	1	1	1	1	1	4.8	2.1	2.7	1	1.4	1	1	1	3.8	1.4	1.2	1.4	1	1	1.1	1.2	4	1.2	1	1	1.2	1	1.1	1	2.6	2.5	1	1	1
S07	Object_anger	34	female	100	480	16	3	4	9	15	19	25	5.3	2.6	3.7	1	1	1	1	1	4.8	2.1	2.7	1	1.4	1	1	1	3.8	1.4	1.2	1.4	1	1	1.1	1.2	4	1.2	1	1	1.2	1	1.1	1	2.6	2.5	1	1	1
S07	Object_surprise	34	female	100	480	16	3	4	9	15	19	25	5.3	2.6	3.7	1	1	1	1	1	4.8	2.1	2.7	1	1.4	1	1	1	3.8	1.4	1.2	1.4	1	1	1.1	1.2	4	1.2	1	1	1.2	1	1.1	1	2.6	2.5	1	1	1
S07	Pixel_arousal	34	female	100	480	16	3	4	9	15	19	25	5.3	2.6	3.7	1	1	1	1	1	4.8	2.1	2.7	1	1.4	1	1	1	3.8	1.4	1.2	1.4	1	1	1.1	1.2	4	1.2	1	1	1.2	1	1.1	1	2.6	2.5	1	1	1
S07	Pixel_happiness	34	female	100	480	16	3	4	9	15	19	25	5.3	2.6	3.7	1	1	1	1	1	4.8	2.1	2.7	1	1.4	1	1	1	3.8	1.4	1.2	1.4	1	1	1.1	1.2	4	1.2	1	1	1.2	1	1.1	1	2.6	2.5	1	1	1
S07	Pixel_disgust	34	female	100	480	16	3	4	9	15	19	25	5.3	2.6	3.7	1	1	1	1	1	4.8	2.1	2.7	1	1.4	1	1	1	3.8	1.4	1.2	1.4	1	1	1.1	1.2	4	1.2	1	1	1.2	1	1.1	1	2.6	2.5	1	1	1
S07	Pixel_fear	34	female	100	480	16	3	4	9	15	19	25	5.3	2.6	3.7	1	1	1	1	1	4.8	2.1	2.7	1	1.4	1	1	1	3.8	1.4	1.2	1.4	1	1	1.1	1.2	4	1.2	1	1	1.2	1	1.1	1	2.6	2.5	1	1	1
S07	Pixel_sadness	34	female	100	480	16	3	4	9	15	19	25	5.3	2.6	3.7	1	1	1	1	1	4.8	2.1	2.7	1	1.4	1	1	1	3.8	1.4	1.2	1.4	1	1	1.1	1.2	4	1.2	1	1	1.2	1	1.1	1	2.6	2.5	1	1	1
S07	Pixel_valence	34	female	100	480	16	3	4	9	15	19	25	5.3	2.6	3.7	1	1	1	1	1	4.8	2.1	2.7	1	1.4	1	1	1	3.8	1.4	1.2	1.4	1	1	1.1	1.2	4	1.2	1	1	1.2	1	1.1	1	2.6	2.5	1	1	1
S07	Pixel_anger	34	female	100	480	16	3	4	9	15	19	25	5.3	2.6	3.7	1	1	1	1	1	4.8	2.1	2.7	1	1.4	1	1	1	3.8	1.4	1.2	1.4	1	1	1.1	1.2	4	1.2	1	1	1.2	1	1.1	1	2.6	2.5	1	1	1
S07	Pixel_surprise	34	female	100	480	16	3	4	9	15	19	25	5.3	2.6	3.7	1	1	1	1	1	4.8	2.1	2.7	1	1.4	1	1	1	3.8	1.4	1.2	1.4	1	1	1.1	1.2	4	1.2	1	1	1.2	1	1.1	1	2.6	2.5	1	1	1
S08	ThreateningDogs_arousal	34	male	80	168	5	2.38	2.75	8	13	8	12	4.6	3.9	4.2	2.6	3	1.6	2.3	1.5	5	4	4	2.3	2.5	1.5	1.9	1.4	3.5	3.5	1.6	3.6	2.6	2.4	2.9	1.9	3.8	3.6	2.3	3.2	2.6	2.4	2.7	1.9	4.1	3.3	3.5	1.8	2.1
S08	ThreateningDogs_happiness	34	male	80	168	5	2.38	2.75	8	13	8	12	4.6	3.9	4.2	2.6	3	1.6	2.3	1.5	5	4	4	2.3	2.5	1.5	1.9	1.4	3.5	3.5	1.6	3.6	2.6	2.4	2.9	1.9	3.8	3.6	2.3	3.2	2.6	2.4	2.7	1.9	4.1	3.3	3.5	1.8	2.1
S08	ThreateningDogs_disgust	34	male	80	168	5	2.38	2.75	8	13	8	12	4.6	3.9	4.2	2.6	3	1.6	2.3	1.5	5	4	4	2.3	2.5	1.5	1.9	1.4	3.5	3.5	1.6	3.6	2.6	2.4	2.9	1.9	3.8	3.6	2.3	3.2	2.6	2.4	2.7	1.9	4.1	3.3	3.5	1.8	2.1
S08	ThreateningDogs_fear	34	male	80	168	5	2.38	2.75	8	13	8	12	4.6	3.9	4.2	2.6	3	1.6	2.3	1.5	5	4	4	2.3	2.5	1.5	1.9	1.4	3.5	3.5	1.6	3.6	2.6	2.4	2.9	1.9	3.8	3.6	2.3	3.2	2.6	2.4	2.7	1.9	4.1	3.3	3.5	1.8	2.1
S08	ThreateningDogs_sadness	34	male	80	168	5	2.38	2.75	8	13	8	12	4.6	3.9	4.2	2.6	3	1.6	2.3	1.5	5	4	4	2.3	2.5	1.5	1.9	1.4	3.5	3.5	1.6	3.6	2.6	2.4	2.9	1.9	3.8	3.6	2.3	3.2	2.6	2.4	2.7	1.9	4.1	3.3	3.5	1.8	2.1
S08	ThreateningDogs_valence	34	male	80	168	5	2.38	2.75	8	13	8	12	4.6	3.9	4.2	2.6	3	1.6	2.3	1.5	5	4	4	2.3	2.5	1.5	1.9	1.4	3.5	3.5	1.6	3.6	2.6	2.4	2.9	1.9	3.8	3.6	2.3	3.2	2.6	2.4	2.7	1.9	4.1	3.3	3.5	1.8	2.1
S08	ThreateningDogs_anger	34	male	80	168	5	2.38	2.75	8	13	8	12	4.6	3.9	4.2	2.6	3	1.6	2.3	1.5	5	4	4	2.3	2.5	1.5	1.9	1.4	3.5	3.5	1.6	3.6	2.6	2.4	2.9	1.9	3.8	3.6	2.3	3.2	2.6	2.4	2.7	1.9	4.1	3.3	3.5	1.8	2.1
S08	ThreateningDogs_surprise	34	male	80	168	5	2.38	2.75	8	13	8	12	4.6	3.9	4.2	2.6	3	1.6	2.3	1.5	5	4	4	2.3	2.5	1.5	1.9	1.4	3.5	3.5	1.6	3.6	2.6	2.4	2.9	1.9	3.8	3.6	2.3	3.2	2.6	2.4	2.7	1.9	4.1	3.3	3.5	1.8	2.1
S08	ThreateningHumans_arousal	34	male	80	168	5	2.38	2.75	8	13	8	12	4.6	3.9	4.2	2.6	3	1.6	2.3	1.5	5	4	4	2.3	2.5	1.5	1.9	1.4	3.5	3.5	1.6	3.6	2.6	2.4	2.9	1.9	3.8	3.6	2.3	3.2	2.6	2.4	2.7	1.9	4.1	3.3	3.5	1.8	2.1
S08	ThreateningHumans_happiness	34	male	80	168	5	2.38	2.75	8	13	8	12	4.6	3.9	4.2	2.6	3	1.6	2.3	1.5	5	4	4	2.3	2.5	1.5	1.9	1.4	3.5	3.5	1.6	3.6	2.6	2.4	2.9	1.9	3.8	3.6	2.3	3.2	2.6	2.4	2.7	1.9	4.1	3.3	3.5	1.8	2.1
S08	ThreateningHumans_disgust	34	male	80	168	5	2.38	2.75	8	13	8	12	4.6	3.9	4.2	2.6	3	1.6	2.3	1.5	5	4	4	2.3	2.5	1.5	1.9	1.4	3.5	3.5	1.6	3.6	2.6	2.4	2.9	1.9	3.8	3.6	2.3	3.2	2.6	2.4	2.7	1.9	4.1	3.3	3.5	1.8	2.1
S08	ThreateningHumans_fear	34	male	80	168	5	2.38	2.75	8	13	8	12	4.6	3.9	4.2	2.6	3	1.6	2.3	1.5	5	4	4	2.3	2.5	1.5	1.9	1.4	3.5	3.5	1.6	3.6	2.6	2.4	2.9	1.9	3.8	3.6	2.3	3.2	2.6	2.4	2.7	1.9	4.1	3.3	3.5	1.8	2.1
S08	ThreateningHumans_sadness	34	male	80	168	5	2.38	2.75	8	13	8	12	4.6	3.9	4.2	2.6	3	1.6	2.3	1.5	5	4	4	2.3	2.5	1.5	1.9	1.4	3.5	3.5	1.6	3.6	2.6	2.4	2.9	1.9	3.8	3.6	2.3	3.2	2.6	2.4	2.7	1.9	4.1	3.3	3.5	1.8	2.1
S08	ThreateningHumans_valence	34	male	80	168	5	2.38	2.75	8	13	8	12	4.6	3.9	4.2	2.6	3	1.6	2.3	1.5	5	4	4	2.3	2.5	1.5	1.9	1.4	3.5	3.5	1.6	3.6	2.6	2.4	2.9	1.9	3.8	3.6	2.3	3.2	2.6	2.4	2.7	1.9	4.1	3.3	3.5	1.8	2.1
S08	ThreateningHumans_anger	34	male	80	168	5	2.38	2.75	8	13	8	12	4.6	3.9	4.2	2.6	3	1.6	2.3	1.5	5	4	4	2.3	2.5	1.5	1.9	1.4	3.5	3.5	1.6	3.6	2.6	2.4	2.9	1.9	3.8	3.6	2.3	3.2	2.6	2.4	2.7	1.9	4.1	3.3	3.5	1.8	2.1
S08	ThreateningHumans_surprise	34	male	80	168	5	2.38	2.75	8	13	8	12	4.6	3.9	4.2	2.6	3	1.6	2.3	1.5	5	4	4	2.3	2.5	1.5	1.9	1.4	3.5	3.5	1.6	3.6	2.6	2.4	2.9	1.9	3.8	3.6	2.3	3.2	2.6	2.4	2.7	1.9	4.1	3.3	3.5	1.8	2.1
S08	PleasantDogs_arousal	34	male	80	168	5	2.38	2.75	8	13	8	12	4.6	3.9	4.2	2.6	3	1.6	2.3	1.5	5	4	4	2.3	2.5	1.5	1.9	1.4	3.5	3.5	1.6	3.6	2.6	2.4	2.9	1.9	3.8	3.6	2.3	3.2	2.6	2.4	2.7	1.9	4.1	3.3	3.5	1.8	2.1
S08	PleasantDogs_happiness	34	male	80	168	5	2.38	2.75	8	13	8	12	4.6	3.9	4.2	2.6	3	1.6	2.3	1.5	5	4	4	2.3	2.5	1.5	1.9	1.4	3.5	3.5	1.6	3.6	2.6	2.4	2.9	1.9	3.8	3.6	2.3	3.2	2.6	2.4	2.7	1.9	4.1	3.3	3.5	1.8	2.1
S08	PleasantDogs_disgust	34	male	80	168	5	2.38	2.75	8	13	8	12	4.6	3.9	4.2	2.6	3	1.6	2.3	1.5	5	4	4	2.3	2.5	1.5	1.9	1.4	3.5	3.5	1.6	3.6	2.6	2.4	2.9	1.9	3.8	3.6	2.3	3.2	2.6	2.4	2.7	1.9	4.1	3.3	3.5	1.8	2.1
S08	PleasantDogs_fear	34	male	80	168	5	2.38	2.75	8	13	8	12	4.6	3.9	4.2	2.6	3	1.6	2.3	1.5	5	4	4	2.3	2.5	1.5	1.9	1.4	3.5	3.5	1.6	3.6	2.6	2.4	2.9	1.9	3.8	3.6	2.3	3.2	2.6	2.4	2.7	1.9	4.1	3.3	3.5	1.8	2.1
S08	PleasantDogs_sadness	34	male	80	168	5	2.38	2.75	8	13	8	12	4.6	3.9	4.2	2.6	3	1.6	2.3	1.5	5	4	4	2.3	2.5	1.5	1.9	1.4	3.5	3.5	1.6	3.6	2.6	2.4	2.9	1.9	3.8	3.6	2.3	3.2	2.6	2.4	2.7	1.9	4.1	3.3	3.5	1.8	2.1
S08	PleasantDogs_valence	34	male	80	168	5	2.38	2.75	8	13	8	12	4.6	3.9	4.2	2.6	3	1.6	2.3	1.5	5	4	4	2.3	2.5	1.5	1.9	1.4	3.5	3.5	1.6	3.6	2.6	2.4	2.9	1.9	3.8	3.6	2.3	3.2	2.6	2.4	2.7	1.9	4.1	3.3	3.5	1.8	2.1
S08	PleasantDogs_anger	34	male	80	168	5	2.38	2.75	8	13	8	12	4.6	3.9	4.2	2.6	3	1.6	2.3	1.5	5	4	4	2.3	2.5	1.5	1.9	1.4	3.5	3.5	1.6	3.6	2.6	2.4	2.9	1.9	3.8	3.6	2.3	3.2	2.6	2.4	2.7	1.9	4.1	3.3	3.5	1.8	2.1
S08	PleasantDogs_surprise	34	male	80	168	5	2.38	2.75	8	13	8	12	4.6	3.9	4.2	2.6	3	1.6	2.3	1.5	5	4	4	2.3	2.5	1.5	1.9	1.4	3.5	3.5	1.6	3.6	2.6	2.4	2.9	1.9	3.8	3.6	2.3	3.2	2.6	2.4	2.7	1.9	4.1	3.3	3.5	1.8	2.1
S08	PleasantHumans_arousal	34	male	80	168	5	2.38	2.75	8	13	8	12	4.6	3.9	4.2	2.6	3	1.6	2.3	1.5	5	4	4	2.3	2.5	1.5	1.9	1.4	3.5	3.5	1.6	3.6	2.6	2.4	2.9	1.9	3.8	3.6	2.3	3.2	2.6	2.4	2.7	1.9	4.1	3.3	3.5	1.8	2.1
S08	PleasantHumans_happiness	34	male	80	168	5	2.38	2.75	8	13	8	12	4.6	3.9	4.2	2.6	3	1.6	2.3	1.5	5	4	4	2.3	2.5	1.5	1.9	1.4	3.5	3.5	1.6	3.6	2.6	2.4	2.9	1.9	3.8	3.6	2.3	3.2	2.6	2.4	2.7	1.9	4.1	3.3	3.5	1.8	2.1
S08	PleasantHumans_disgust	34	male	80	168	5	2.38	2.75	8	13	8	12	4.6	3.9	4.2	2.6	3	1.6	2.3	1.5	5	4	4	2.3	2.5	1.5	1.9	1.4	3.5	3.5	1.6	3.6	2.6	2.4	2.9	1.9	3.8	3.6	2.3	3.2	2.6	2.4	2.7	1.9	4.1	3.3	3.5	1.8	2.1
S08	PleasantHumans_fear	34	male	80	168	5	2.38	2.75	8	13	8	12	4.6	3.9	4.2	2.6	3	1.6	2.3	1.5	5	4	4	2.3	2.5	1.5	1.9	1.4	3.5	3.5	1.6	3.6	2.6	2.4	2.9	1.9	3.8	3.6	2.3	3.2	2.6	2.4	2.7	1.9	4.1	3.3	3.5	1.8	2.1
S08	PleasantHumans_sadness	34	male	80	168	5	2.38	2.75	8	13	8	12	4.6	3.9	4.2	2.6	3	1.6	2.3	1.5	5	4	4	2.3	2.5	1.5	1.9	1.4	3.5	3.5	1.6	3.6	2.6	2.4	2.9	1.9	3.8	3.6	2.3	3.2	2.6	2.4	2.7	1.9	4.1	3.3	3.5	1.8	2.1
S08	PleasantHumans_valence	34	male	80	168	5	2.38	2.75	8	13	8	12	4.6	3.9	4.2	2.6	3	1.6	2.3	1.5	5	4	4	2.3	2.5	1.5	1.9	1.4	3.5	3.5	1.6	3.6	2.6	2.4	2.9	1.9	3.8	3.6	2.3	3.2	2.6	2.4	2.7	1.9	4.1	3.3	3.5	1.8	2.1
S08	PleasantHumans_anger	34	male	80	168	5	2.38	2.75	8	13	8	12	4.6	3.9	4.2	2.6	3	1.6	2.3	1.5	5	4	4	2.3	2.5	1.5	1.9	1.4	3.5	3.5	1.6	3.6	2.6	2.4	2.9	1.9	3.8	3.6	2.3	3.2	2.6	2.4	2.7	1.9	4.1	3.3	3.5	1.8	2.1
S08	PleasantHumans_surprise	34	male	80	168	5	2.38	2.75	8	13	8	12	4.6	3.9	4.2	2.6	3	1.6	2.3	1.5	5	4	4	2.3	2.5	1.5	1.9	1.4	3.5	3.5	1.6	3.6	2.6	2.4	2.9	1.9	3.8	3.6	2.3	3.2	2.6	2.4	2.7	1.9	4.1	3.3	3.5	1.8	2.1
S08	NeutralDogs_arousal	34	male	80	168	5	2.38	2.75	8	13	8	12	4.6	3.9	4.2	2.6	3	1.6	2.3	1.5	5	4	4	2.3	2.5	1.5	1.9	1.4	3.5	3.5	1.6	3.6	2.6	2.4	2.9	1.9	3.8	3.6	2.3	3.2	2.6	2.4	2.7	1.9	4.1	3.3	3.5	1.8	2.1
S08	NeutralDogs_happiness	34	male	80	168	5	2.38	2.75	8	13	8	12	4.6	3.9	4.2	2.6	3	1.6	2.3	1.5	5	4	4	2.3	2.5	1.5	1.9	1.4	3.5	3.5	1.6	3.6	2.6	2.4	2.9	1.9	3.8	3.6	2.3	3.2	2.6	2.4	2.7	1.9	4.1	3.3	3.5	1.8	2.1
S08	NeutralDogs_disgust	34	male	80	168	5	2.38	2.75	8	13	8	12	4.6	3.9	4.2	2.6	3	1.6	2.3	1.5	5	4	4	2.3	2.5	1.5	1.9	1.4	3.5	3.5	1.6	3.6	2.6	2.4	2.9	1.9	3.8	3.6	2.3	3.2	2.6	2.4	2.7	1.9	4.1	3.3	3.5	1.8	2.1
S08	NeutralDogs_fear	34	male	80	168	5	2.38	2.75	8	13	8	12	4.6	3.9	4.2	2.6	3	1.6	2.3	1.5	5	4	4	2.3	2.5	1.5	1.9	1.4	3.5	3.5	1.6	3.6	2.6	2.4	2.9	1.9	3.8	3.6	2.3	3.2	2.6	2.4	2.7	1.9	4.1	3.3	3.5	1.8	2.1
S08	NeutralDogs_sadness	34	male	80	168	5	2.38	2.75	8	13	8	12	4.6	3.9	4.2	2.6	3	1.6	2.3	1.5	5	4	4	2.3	2.5	1.5	1.9	1.4	3.5	3.5	1.6	3.6	2.6	2.4	2.9	1.9	3.8	3.6	2.3	3.2	2.6	2.4	2.7	1.9	4.1	3.3	3.5	1.8	2.1
S08	NeutralDogs_valence	34	male	80	168	5	2.38	2.75	8	13	8	12	4.6	3.9	4.2	2.6	3	1.6	2.3	1.5	5	4	4	2.3	2.5	1.5	1.9	1.4	3.5	3.5	1.6	3.6	2.6	2.4	2.9	1.9	3.8	3.6	2.3	3.2	2.6	2.4	2.7	1.9	4.1	3.3	3.5	1.8	2.1
S08	NeutralDogs_anger	34	male	80	168	5	2.38	2.75	8	13	8	12	4.6	3.9	4.2	2.6	3	1.6	2.3	1.5	5	4	4	2.3	2.5	1.5	1.9	1.4	3.5	3.5	1.6	3.6	2.6	2.4	2.9	1.9	3.8	3.6	2.3	3.2	2.6	2.4	2.7	1.9	4.1	3.3	3.5	1.8	2.1
S08	NeutralDogs_surprise	34	male	80	168	5	2.38	2.75	8	13	8	12	4.6	3.9	4.2	2.6	3	1.6	2.3	1.5	5	4	4	2.3	2.5	1.5	1.9	1.4	3.5	3.5	1.6	3.6	2.6	2.4	2.9	1.9	3.8	3.6	2.3	3.2	2.6	2.4	2.7	1.9	4.1	3.3	3.5	1.8	2.1
S08	NeutralHumans_arousal	34	male	80	168	5	2.38	2.75	8	13	8	12	4.6	3.9	4.2	2.6	3	1.6	2.3	1.5	5	4	4	2.3	2.5	1.5	1.9	1.4	3.5	3.5	1.6	3.6	2.6	2.4	2.9	1.9	3.8	3.6	2.3	3.2	2.6	2.4	2.7	1.9	4.1	3.3	3.5	1.8	2.1
S08	NeutralHumans_happiness	34	male	80	168	5	2.38	2.75	8	13	8	12	4.6	3.9	4.2	2.6	3	1.6	2.3	1.5	5	4	4	2.3	2.5	1.5	1.9	1.4	3.5	3.5	1.6	3.6	2.6	2.4	2.9	1.9	3.8	3.6	2.3	3.2	2.6	2.4	2.7	1.9	4.1	3.3	3.5	1.8	2.1
S08	NeutralHumans_disgust	34	male	80	168	5	2.38	2.75	8	13	8	12	4.6	3.9	4.2	2.6	3	1.6	2.3	1.5	5	4	4	2.3	2.5	1.5	1.9	1.4	3.5	3.5	1.6	3.6	2.6	2.4	2.9	1.9	3.8	3.6	2.3	3.2	2.6	2.4	2.7	1.9	4.1	3.3	3.5	1.8	2.1
S08	NeutralHumans_fear	34	male	80	168	5	2.38	2.75	8	13	8	12	4.6	3.9	4.2	2.6	3	1.6	2.3	1.5	5	4	4	2.3	2.5	1.5	1.9	1.4	3.5	3.5	1.6	3.6	2.6	2.4	2.9	1.9	3.8	3.6	2.3	3.2	2.6	2.4	2.7	1.9	4.1	3.3	3.5	1.8	2.1
S08	NeutralHumans_sadness	34	male	80	168	5	2.38	2.75	8	13	8	12	4.6	3.9	4.2	2.6	3	1.6	2.3	1.5	5	4	4	2.3	2.5	1.5	1.9	1.4	3.5	3.5	1.6	3.6	2.6	2.4	2.9	1.9	3.8	3.6	2.3	3.2	2.6	2.4	2.7	1.9	4.1	3.3	3.5	1.8	2.1
S08	NeutralHumans_valence	34	male	80	168	5	2.38	2.75	8	13	8	12	4.6	3.9	4.2	2.6	3	1.6	2.3	1.5	5	4	4	2.3	2.5	1.5	1.9	1.4	3.5	3.5	1.6	3.6	2.6	2.4	2.9	1.9	3.8	3.6	2.3	3.2	2.6	2.4	2.7	1.9	4.1	3.3	3.5	1.8	2.1
S08	NeutralHumans_anger	34	male	80	168	5	2.38	2.75	8	13	8	12	4.6	3.9	4.2	2.6	3	1.6	2.3	1.5	5	4	4	2.3	2.5	1.5	1.9	1.4	3.5	3.5	1.6	3.6	2.6	2.4	2.9	1.9	3.8	3.6	2.3	3.2	2.6	2.4	2.7	1.9	4.1	3.3	3.5	1.8	2.1
S08	NeutralHumans_surprise	34	male	80	168	5	2.38	2.75	8	13	8	12	4.6	3.9	4.2	2.6	3	1.6	2.3	1.5	5	4	4	2.3	2.5	1.5	1.9	1.4	3.5	3.5	1.6	3.6	2.6	2.4	2.9	1.9	3.8	3.6	2.3	3.2	2.6	2.4	2.7	1.9	4.1	3.3	3.5	1.8	2.1
S08	Object_arousal	34	male	80	168	5	2.38	2.75	8	13	8	12	4.6	3.9	4.2	2.6	3	1.6	2.3	1.5	5	4	4	2.3	2.5	1.5	1.9	1.4	3.5	3.5	1.6	3.6	2.6	2.4	2.9	1.9	3.8	3.6	2.3	3.2	2.6	2.4	2.7	1.9	4.1	3.3	3.5	1.8	2.1
S08	Object_happiness	34	male	80	168	5	2.38	2.75	8	13	8	12	4.6	3.9	4.2	2.6	3	1.6	2.3	1.5	5	4	4	2.3	2.5	1.5	1.9	1.4	3.5	3.5	1.6	3.6	2.6	2.4	2.9	1.9	3.8	3.6	2.3	3.2	2.6	2.4	2.7	1.9	4.1	3.3	3.5	1.8	2.1
S08	Object_disgust	34	male	80	168	5	2.38	2.75	8	13	8	12	4.6	3.9	4.2	2.6	3	1.6	2.3	1.5	5	4	4	2.3	2.5	1.5	1.9	1.4	3.5	3.5	1.6	3.6	2.6	2.4	2.9	1.9	3.8	3.6	2.3	3.2	2.6	2.4	2.7	1.9	4.1	3.3	3.5	1.8	2.1
S08	Object_fear	34	male	80	168	5	2.38	2.75	8	13	8	12	4.6	3.9	4.2	2.6	3	1.6	2.3	1.5	5	4	4	2.3	2.5	1.5	1.9	1.4	3.5	3.5	1.6	3.6	2.6	2.4	2.9	1.9	3.8	3.6	2.3	3.2	2.6	2.4	2.7	1.9	4.1	3.3	3.5	1.8	2.1
S08	Object_sadness	34	male	80	168	5	2.38	2.75	8	13	8	12	4.6	3.9	4.2	2.6	3	1.6	2.3	1.5	5	4	4	2.3	2.5	1.5	1.9	1.4	3.5	3.5	1.6	3.6	2.6	2.4	2.9	1.9	3.8	3.6	2.3	3.2	2.6	2.4	2.7	1.9	4.1	3.3	3.5	1.8	2.1
S08	Object_valence	34	male	80	168	5	2.38	2.75	8	13	8	12	4.6	3.9	4.2	2.6	3	1.6	2.3	1.5	5	4	4	2.3	2.5	1.5	1.9	1.4	3.5	3.5	1.6	3.6	2.6	2.4	2.9	1.9	3.8	3.6	2.3	3.2	2.6	2.4	2.7	1.9	4.1	3.3	3.5	1.8	2.1
S08	Object_anger	34	male	80	168	5	2.38	2.75	8	13	8	12	4.6	3.9	4.2	2.6	3	1.6	2.3	1.5	5	4	4	2.3	2.5	1.5	1.9	1.4	3.5	3.5	1.6	3.6	2.6	2.4	2.9	1.9	3.8	3.6	2.3	3.2	2.6	2.4	2.7	1.9	4.1	3.3	3.5	1.8	2.1
S08	Object_surprise	34	male	80	168	5	2.38	2.75	8	13	8	12	4.6	3.9	4.2	2.6	3	1.6	2.3	1.5	5	4	4	2.3	2.5	1.5	1.9	1.4	3.5	3.5	1.6	3.6	2.6	2.4	2.9	1.9	3.8	3.6	2.3	3.2	2.6	2.4	2.7	1.9	4.1	3.3	3.5	1.8	2.1
S08	Pixel_arousal	34	male	80	168	5	2.38	2.75	8	13	8	12	4.6	3.9	4.2	2.6	3	1.6	2.3	1.5	5	4	4	2.3	2.5	1.5	1.9	1.4	3.5	3.5	1.6	3.6	2.6	2.4	2.9	1.9	3.8	3.6	2.3	3.2	2.6	2.4	2.7	1.9	4.1	3.3	3.5	1.8	2.1
S08	Pixel_happiness	34	male	80	168	5	2.38	2.75	8	13	8	12	4.6	3.9	4.2	2.6	3	1.6	2.3	1.5	5	4	4	2.3	2.5	1.5	1.9	1.4	3.5	3.5	1.6	3.6	2.6	2.4	2.9	1.9	3.8	3.6	2.3	3.2	2.6	2.4	2.7	1.9	4.1	3.3	3.5	1.8	2.1
S08	Pixel_disgust	34	male	80	168	5	2.38	2.75	8	13	8	12	4.6	3.9	4.2	2.6	3	1.6	2.3	1.5	5	4	4	2.3	2.5	1.5	1.9	1.4	3.5	3.5	1.6	3.6	2.6	2.4	2.9	1.9	3.8	3.6	2.3	3.2	2.6	2.4	2.7	1.9	4.1	3.3	3.5	1.8	2.1
S08	Pixel_fear	34	male	80	168	5	2.38	2.75	8	13	8	12	4.6	3.9	4.2	2.6	3	1.6	2.3	1.5	5	4	4	2.3	2.5	1.5	1.9	1.4	3.5	3.5	1.6	3.6	2.6	2.4	2.9	1.9	3.8	3.6	2.3	3.2	2.6	2.4	2.7	1.9	4.1	3.3	3.5	1.8	2.1
S08	Pixel_sadness	34	male	80	168	5	2.38	2.75	8	13	8	12	4.6	3.9	4.2	2.6	3	1.6	2.3	1.5	5	4	4	2.3	2.5	1.5	1.9	1.4	3.5	3.5	1.6	3.6	2.6	2.4	2.9	1.9	3.8	3.6	2.3	3.2	2.6	2.4	2.7	1.9	4.1	3.3	3.5	1.8	2.1
S08	Pixel_valence	34	male	80	168	5	2.38	2.75	8	13	8	12	4.6	3.9	4.2	2.6	3	1.6	2.3	1.5	5	4	4	2.3	2.5	1.5	1.9	1.4	3.5	3.5	1.6	3.6	2.6	2.4	2.9	1.9	3.8	3.6	2.3	3.2	2.6	2.4	2.7	1.9	4.1	3.3	3.5	1.8	2.1
S08	Pixel_anger	34	male	80	168	5	2.38	2.75	8	13	8	12	4.6	3.9	4.2	2.6	3	1.6	2.3	1.5	5	4	4	2.3	2.5	1.5	1.9	1.4	3.5	3.5	1.6	3.6	2.6	2.4	2.9	1.9	3.8	3.6	2.3	3.2	2.6	2.4	2.7	1.9	4.1	3.3	3.5	1.8	2.1
S08	Pixel_surprise	34	male	80	168	5	2.38	2.75	8	13	8	12	4.6	3.9	4.2	2.6	3	1.6	2.3	1.5	5	4	4	2.3	2.5	1.5	1.9	1.4	3.5	3.5	1.6	3.6	2.6	2.4	2.9	1.9	3.8	3.6	2.3	3.2	2.6	2.4	2.7	1.9	4.1	3.3	3.5	1.8	2.1
S09	ThreateningDogs_arousal	34	female	90	337.5	7	3.63	2.75	19	18	22	16	5.4	4.2	4.9	1.5	2	1.3	1.4	1.3	5.3	4	4.2	1.9	2.1	1.4	1.9	1.1	3.4	3.4	2.1	3.1	1.5	2.6	2.4	2.6	3.5	4.5	2.1	2.2	1.8	2.1	2.5	2.3	2.7	4.6	1.9	2.6	2.6
S09	ThreateningDogs_happiness	34	female	90	337.5	7	3.63	2.75	19	18	22	16	5.4	4.2	4.9	1.5	2	1.3	1.4	1.3	5.3	4	4.2	1.9	2.1	1.4	1.9	1.1	3.4	3.4	2.1	3.1	1.5	2.6	2.4	2.6	3.5	4.5	2.1	2.2	1.8	2.1	2.5	2.3	2.7	4.6	1.9	2.6	2.6
S09	ThreateningDogs_disgust	34	female	90	337.5	7	3.63	2.75	19	18	22	16	5.4	4.2	4.9	1.5	2	1.3	1.4	1.3	5.3	4	4.2	1.9	2.1	1.4	1.9	1.1	3.4	3.4	2.1	3.1	1.5	2.6	2.4	2.6	3.5	4.5	2.1	2.2	1.8	2.1	2.5	2.3	2.7	4.6	1.9	2.6	2.6
S09	ThreateningDogs_fear	34	female	90	337.5	7	3.63	2.75	19	18	22	16	5.4	4.2	4.9	1.5	2	1.3	1.4	1.3	5.3	4	4.2	1.9	2.1	1.4	1.9	1.1	3.4	3.4	2.1	3.1	1.5	2.6	2.4	2.6	3.5	4.5	2.1	2.2	1.8	2.1	2.5	2.3	2.7	4.6	1.9	2.6	2.6
S09	ThreateningDogs_sadness	34	female	90	337.5	7	3.63	2.75	19	18	22	16	5.4	4.2	4.9	1.5	2	1.3	1.4	1.3	5.3	4	4.2	1.9	2.1	1.4	1.9	1.1	3.4	3.4	2.1	3.1	1.5	2.6	2.4	2.6	3.5	4.5	2.1	2.2	1.8	2.1	2.5	2.3	2.7	4.6	1.9	2.6	2.6
S09	ThreateningDogs_valence	34	female	90	337.5	7	3.63	2.75	19	18	22	16	5.4	4.2	4.9	1.5	2	1.3	1.4	1.3	5.3	4	4.2	1.9	2.1	1.4	1.9	1.1	3.4	3.4	2.1	3.1	1.5	2.6	2.4	2.6	3.5	4.5	2.1	2.2	1.8	2.1	2.5	2.3	2.7	4.6	1.9	2.6	2.6
S09	ThreateningDogs_anger	34	female	90	337.5	7	3.63	2.75	19	18	22	16	5.4	4.2	4.9	1.5	2	1.3	1.4	1.3	5.3	4	4.2	1.9	2.1	1.4	1.9	1.1	3.4	3.4	2.1	3.1	1.5	2.6	2.4	2.6	3.5	4.5	2.1	2.2	1.8	2.1	2.5	2.3	2.7	4.6	1.9	2.6	2.6
S09	ThreateningDogs_surprise	34	female	90	337.5	7	3.63	2.75	19	18	22	16	5.4	4.2	4.9	1.5	2	1.3	1.4	1.3	5.3	4	4.2	1.9	2.1	1.4	1.9	1.1	3.4	3.4	2.1	3.1	1.5	2.6	2.4	2.6	3.5	4.5	2.1	2.2	1.8	2.1	2.5	2.3	2.7	4.6	1.9	2.6	2.6
S09	ThreateningHumans_arousal	34	female	90	337.5	7	3.63	2.75	19	18	22	16	5.4	4.2	4.9	1.5	2	1.3	1.4	1.3	5.3	4	4.2	1.9	2.1	1.4	1.9	1.1	3.4	3.4	2.1	3.1	1.5	2.6	2.4	2.6	3.5	4.5	2.1	2.2	1.8	2.1	2.5	2.3	2.7	4.6	1.9	2.6	2.6
S09	ThreateningHumans_happiness	34	female	90	337.5	7	3.63	2.75	19	18	22	16	5.4	4.2	4.9	1.5	2	1.3	1.4	1.3	5.3	4	4.2	1.9	2.1	1.4	1.9	1.1	3.4	3.4	2.1	3.1	1.5	2.6	2.4	2.6	3.5	4.5	2.1	2.2	1.8	2.1	2.5	2.3	2.7	4.6	1.9	2.6	2.6
S09	ThreateningHumans_disgust	34	female	90	337.5	7	3.63	2.75	19	18	22	16	5.4	4.2	4.9	1.5	2	1.3	1.4	1.3	5.3	4	4.2	1.9	2.1	1.4	1.9	1.1	3.4	3.4	2.1	3.1	1.5	2.6	2.4	2.6	3.5	4.5	2.1	2.2	1.8	2.1	2.5	2.3	2.7	4.6	1.9	2.6	2.6
S09	ThreateningHumans_fear	34	female	90	337.5	7	3.63	2.75	19	18	22	16	5.4	4.2	4.9	1.5	2	1.3	1.4	1.3	5.3	4	4.2	1.9	2.1	1.4	1.9	1.1	3.4	3.4	2.1	3.1	1.5	2.6	2.4	2.6	3.5	4.5	2.1	2.2	1.8	2.1	2.5	2.3	2.7	4.6	1.9	2.6	2.6
S09	ThreateningHumans_sadness	34	female	90	337.5	7	3.63	2.75	19	18	22	16	5.4	4.2	4.9	1.5	2	1.3	1.4	1.3	5.3	4	4.2	1.9	2.1	1.4	1.9	1.1	3.4	3.4	2.1	3.1	1.5	2.6	2.4	2.6	3.5	4.5	2.1	2.2	1.8	2.1	2.5	2.3	2.7	4.6	1.9	2.6	2.6
S09	ThreateningHumans_valence	34	female	90	337.5	7	3.63	2.75	19	18	22	16	5.4	4.2	4.9	1.5	2	1.3	1.4	1.3	5.3	4	4.2	1.9	2.1	1.4	1.9	1.1	3.4	3.4	2.1	3.1	1.5	2.6	2.4	2.6	3.5	4.5	2.1	2.2	1.8	2.1	2.5	2.3	2.7	4.6	1.9	2.6	2.6
S09	ThreateningHumans_anger	34	female	90	337.5	7	3.63	2.75	19	18	22	16	5.4	4.2	4.9	1.5	2	1.3	1.4	1.3	5.3	4	4.2	1.9	2.1	1.4	1.9	1.1	3.4	3.4	2.1	3.1	1.5	2.6	2.4	2.6	3.5	4.5	2.1	2.2	1.8	2.1	2.5	2.3	2.7	4.6	1.9	2.6	2.6
S09	ThreateningHumans_surprise	34	female	90	337.5	7	3.63	2.75	19	18	22	16	5.4	4.2	4.9	1.5	2	1.3	1.4	1.3	5.3	4	4.2	1.9	2.1	1.4	1.9	1.1	3.4	3.4	2.1	3.1	1.5	2.6	2.4	2.6	3.5	4.5	2.1	2.2	1.8	2.1	2.5	2.3	2.7	4.6	1.9	2.6	2.6
S09	PleasantDogs_arousal	34	female	90	337.5	7	3.63	2.75	19	18	22	16	5.4	4.2	4.9	1.5	2	1.3	1.4	1.3	5.3	4	4.2	1.9	2.1	1.4	1.9	1.1	3.4	3.4	2.1	3.1	1.5	2.6	2.4	2.6	3.5	4.5	2.1	2.2	1.8	2.1	2.5	2.3	2.7	4.6	1.9	2.6	2.6
S09	PleasantDogs_happiness	34	female	90	337.5	7	3.63	2.75	19	18	22	16	5.4	4.2	4.9	1.5	2	1.3	1.4	1.3	5.3	4	4.2	1.9	2.1	1.4	1.9	1.1	3.4	3.4	2.1	3.1	1.5	2.6	2.4	2.6	3.5	4.5	2.1	2.2	1.8	2.1	2.5	2.3	2.7	4.6	1.9	2.6	2.6
S09	PleasantDogs_disgust	34	female	90	337.5	7	3.63	2.75	19	18	22	16	5.4	4.2	4.9	1.5	2	1.3	1.4	1.3	5.3	4	4.2	1.9	2.1	1.4	1.9	1.1	3.4	3.4	2.1	3.1	1.5	2.6	2.4	2.6	3.5	4.5	2.1	2.2	1.8	2.1	2.5	2.3	2.7	4.6	1.9	2.6	2.6
S09	PleasantDogs_fear	34	female	90	337.5	7	3.63	2.75	19	18	22	16	5.4	4.2	4.9	1.5	2	1.3	1.4	1.3	5.3	4	4.2	1.9	2.1	1.4	1.9	1.1	3.4	3.4	2.1	3.1	1.5	2.6	2.4	2.6	3.5	4.5	2.1	2.2	1.8	2.1	2.5	2.3	2.7	4.6	1.9	2.6	2.6
S09	PleasantDogs_sadness	34	female	90	337.5	7	3.63	2.75	19	18	22	16	5.4	4.2	4.9	1.5	2	1.3	1.4	1.3	5.3	4	4.2	1.9	2.1	1.4	1.9	1.1	3.4	3.4	2.1	3.1	1.5	2.6	2.4	2.6	3.5	4.5	2.1	2.2	1.8	2.1	2.5	2.3	2.7	4.6	1.9	2.6	2.6
S09	PleasantDogs_valence	34	female	90	337.5	7	3.63	2.75	19	18	22	16	5.4	4.2	4.9	1.5	2	1.3	1.4	1.3	5.3	4	4.2	1.9	2.1	1.4	1.9	1.1	3.4	3.4	2.1	3.1	1.5	2.6	2.4	2.6	3.5	4.5	2.1	2.2	1.8	2.1	2.5	2.3	2.7	4.6	1.9	2.6	2.6
S09	PleasantDogs_anger	34	female	90	337.5	7	3.63	2.75	19	18	22	16	5.4	4.2	4.9	1.5	2	1.3	1.4	1.3	5.3	4	4.2	1.9	2.1	1.4	1.9	1.1	3.4	3.4	2.1	3.1	1.5	2.6	2.4	2.6	3.5	4.5	2.1	2.2	1.8	2.1	2.5	2.3	2.7	4.6	1.9	2.6	2.6
S09	PleasantDogs_surprise	34	female	90	337.5	7	3.63	2.75	19	18	22	16	5.4	4.2	4.9	1.5	2	1.3	1.4	1.3	5.3	4	4.2	1.9	2.1	1.4	1.9	1.1	3.4	3.4	2.1	3.1	1.5	2.6	2.4	2.6	3.5	4.5	2.1	2.2	1.8	2.1	2.5	2.3	2.7	4.6	1.9	2.6	2.6
S09	PleasantHumans_arousal	34	female	90	337.5	7	3.63	2.75	19	18	22	16	5.4	4.2	4.9	1.5	2	1.3	1.4	1.3	5.3	4	4.2	1.9	2.1	1.4	1.9	1.1	3.4	3.4	2.1	3.1	1.5	2.6	2.4	2.6	3.5	4.5	2.1	2.2	1.8	2.1	2.5	2.3	2.7	4.6	1.9	2.6	2.6
S09	PleasantHumans_happiness	34	female	90	337.5	7	3.63	2.75	19	18	22	16	5.4	4.2	4.9	1.5	2	1.3	1.4	1.3	5.3	4	4.2	1.9	2.1	1.4	1.9	1.1	3.4	3.4	2.1	3.1	1.5	2.6	2.4	2.6	3.5	4.5	2.1	2.2	1.8	2.1	2.5	2.3	2.7	4.6	1.9	2.6	2.6
S09	PleasantHumans_disgust	34	female	90	337.5	7	3.63	2.75	19	18	22	16	5.4	4.2	4.9	1.5	2	1.3	1.4	1.3	5.3	4	4.2	1.9	2.1	1.4	1.9	1.1	3.4	3.4	2.1	3.1	1.5	2.6	2.4	2.6	3.5	4.5	2.1	2.2	1.8	2.1	2.5	2.3	2.7	4.6	1.9	2.6	2.6
S09	PleasantHumans_fear	34	female	90	337.5	7	3.63	2.75	19	18	22	16	5.4	4.2	4.9	1.5	2	1.3	1.4	1.3	5.3	4	4.2	1.9	2.1	1.4	1.9	1.1	3.4	3.4	2.1	3.1	1.5	2.6	2.4	2.6	3.5	4.5	2.1	2.2	1.8	2.1	2.5	2.3	2.7	4.6	1.9	2.6	2.6
S09	PleasantHumans_sadness	34	female	90	337.5	7	3.63	2.75	19	18	22	16	5.4	4.2	4.9	1.5	2	1.3	1.4	1.3	5.3	4	4.2	1.9	2.1	1.4	1.9	1.1	3.4	3.4	2.1	3.1	1.5	2.6	2.4	2.6	3.5	4.5	2.1	2.2	1.8	2.1	2.5	2.3	2.7	4.6	1.9	2.6	2.6
S09	PleasantHumans_valence	34	female	90	337.5	7	3.63	2.75	19	18	22	16	5.4	4.2	4.9	1.5	2	1.3	1.4	1.3	5.3	4	4.2	1.9	2.1	1.4	1.9	1.1	3.4	3.4	2.1	3.1	1.5	2.6	2.4	2.6	3.5	4.5	2.1	2.2	1.8	2.1	2.5	2.3	2.7	4.6	1.9	2.6	2.6
S09	PleasantHumans_anger	34	female	90	337.5	7	3.63	2.75	19	18	22	16	5.4	4.2	4.9	1.5	2	1.3	1.4	1.3	5.3	4	4.2	1.9	2.1	1.4	1.9	1.1	3.4	3.4	2.1	3.1	1.5	2.6	2.4	2.6	3.5	4.5	2.1	2.2	1.8	2.1	2.5	2.3	2.7	4.6	1.9	2.6	2.6
S09	PleasantHumans_surprise	34	female	90	337.5	7	3.63	2.75	19	18	22	16	5.4	4.2	4.9	1.5	2	1.3	1.4	1.3	5.3	4	4.2	1.9	2.1	1.4	1.9	1.1	3.4	3.4	2.1	3.1	1.5	2.6	2.4	2.6	3.5	4.5	2.1	2.2	1.8	2.1	2.5	2.3	2.7	4.6	1.9	2.6	2.6
S09	NeutralDogs_arousal	34	female	90	337.5	7	3.63	2.75	19	18	22	16	5.4	4.2	4.9	1.5	2	1.3	1.4	1.3	5.3	4	4.2	1.9	2.1	1.4	1.9	1.1	3.4	3.4	2.1	3.1	1.5	2.6	2.4	2.6	3.5	4.5	2.1	2.2	1.8	2.1	2.5	2.3	2.7	4.6	1.9	2.6	2.6
S09	NeutralDogs_happiness	34	female	90	337.5	7	3.63	2.75	19	18	22	16	5.4	4.2	4.9	1.5	2	1.3	1.4	1.3	5.3	4	4.2	1.9	2.1	1.4	1.9	1.1	3.4	3.4	2.1	3.1	1.5	2.6	2.4	2.6	3.5	4.5	2.1	2.2	1.8	2.1	2.5	2.3	2.7	4.6	1.9	2.6	2.6
S09	NeutralDogs_disgust	34	female	90	337.5	7	3.63	2.75	19	18	22	16	5.4	4.2	4.9	1.5	2	1.3	1.4	1.3	5.3	4	4.2	1.9	2.1	1.4	1.9	1.1	3.4	3.4	2.1	3.1	1.5	2.6	2.4	2.6	3.5	4.5	2.1	2.2	1.8	2.1	2.5	2.3	2.7	4.6	1.9	2.6	2.6
S09	NeutralDogs_fear	34	female	90	337.5	7	3.63	2.75	19	18	22	16	5.4	4.2	4.9	1.5	2	1.3	1.4	1.3	5.3	4	4.2	1.9	2.1	1.4	1.9	1.1	3.4	3.4	2.1	3.1	1.5	2.6	2.4	2.6	3.5	4.5	2.1	2.2	1.8	2.1	2.5	2.3	2.7	4.6	1.9	2.6	2.6
S09	NeutralDogs_sadness	34	female	90	337.5	7	3.63	2.75	19	18	22	16	5.4	4.2	4.9	1.5	2	1.3	1.4	1.3	5.3	4	4.2	1.9	2.1	1.4	1.9	1.1	3.4	3.4	2.1	3.1	1.5	2.6	2.4	2.6	3.5	4.5	2.1	2.2	1.8	2.1	2.5	2.3	2.7	4.6	1.9	2.6	2.6
S09	NeutralDogs_valence	34	female	90	337.5	7	3.63	2.75	19	18	22	16	5.4	4.2	4.9	1.5	2	1.3	1.4	1.3	5.3	4	4.2	1.9	2.1	1.4	1.9	1.1	3.4	3.4	2.1	3.1	1.5	2.6	2.4	2.6	3.5	4.5	2.1	2.2	1.8	2.1	2.5	2.3	2.7	4.6	1.9	2.6	2.6
S09	NeutralDogs_anger	34	female	90	337.5	7	3.63	2.75	19	18	22	16	5.4	4.2	4.9	1.5	2	1.3	1.4	1.3	5.3	4	4.2	1.9	2.1	1.4	1.9	1.1	3.4	3.4	2.1	3.1	1.5	2.6	2.4	2.6	3.5	4.5	2.1	2.2	1.8	2.1	2.5	2.3	2.7	4.6	1.9	2.6	2.6
S09	NeutralDogs_surprise	34	female	90	337.5	7	3.63	2.75	19	18	22	16	5.4	4.2	4.9	1.5	2	1.3	1.4	1.3	5.3	4	4.2	1.9	2.1	1.4	1.9	1.1	3.4	3.4	2.1	3.1	1.5	2.6	2.4	2.6	3.5	4.5	2.1	2.2	1.8	2.1	2.5	2.3	2.7	4.6	1.9	2.6	2.6
S09	NeutralHumans_arousal	34	female	90	337.5	7	3.63	2.75	19	18	22	16	5.4	4.2	4.9	1.5	2	1.3	1.4	1.3	5.3	4	4.2	1.9	2.1	1.4	1.9	1.1	3.4	3.4	2.1	3.1	1.5	2.6	2.4	2.6	3.5	4.5	2.1	2.2	1.8	2.1	2.5	2.3	2.7	4.6	1.9	2.6	2.6
S09	NeutralHumans_happiness	34	female	90	337.5	7	3.63	2.75	19	18	22	16	5.4	4.2	4.9	1.5	2	1.3	1.4	1.3	5.3	4	4.2	1.9	2.1	1.4	1.9	1.1	3.4	3.4	2.1	3.1	1.5	2.6	2.4	2.6	3.5	4.5	2.1	2.2	1.8	2.1	2.5	2.3	2.7	4.6	1.9	2.6	2.6
S09	NeutralHumans_disgust	34	female	90	337.5	7	3.63	2.75	19	18	22	16	5.4	4.2	4.9	1.5	2	1.3	1.4	1.3	5.3	4	4.2	1.9	2.1	1.4	1.9	1.1	3.4	3.4	2.1	3.1	1.5	2.6	2.4	2.6	3.5	4.5	2.1	2.2	1.8	2.1	2.5	2.3	2.7	4.6	1.9	2.6	2.6
S09	NeutralHumans_fear	34	female	90	337.5	7	3.63	2.75	19	18	22	16	5.4	4.2	4.9	1.5	2	1.3	1.4	1.3	5.3	4	4.2	1.9	2.1	1.4	1.9	1.1	3.4	3.4	2.1	3.1	1.5	2.6	2.4	2.6	3.5	4.5	2.1	2.2	1.8	2.1	2.5	2.3	2.7	4.6	1.9	2.6	2.6
S09	NeutralHumans_sadness	34	female	90	337.5	7	3.63	2.75	19	18	22	16	5.4	4.2	4.9	1.5	2	1.3	1.4	1.3	5.3	4	4.2	1.9	2.1	1.4	1.9	1.1	3.4	3.4	2.1	3.1	1.5	2.6	2.4	2.6	3.5	4.5	2.1	2.2	1.8	2.1	2.5	2.3	2.7	4.6	1.9	2.6	2.6
S09	NeutralHumans_valence	34	female	90	337.5	7	3.63	2.75	19	18	22	16	5.4	4.2	4.9	1.5	2	1.3	1.4	1.3	5.3	4	4.2	1.9	2.1	1.4	1.9	1.1	3.4	3.4	2.1	3.1	1.5	2.6	2.4	2.6	3.5	4.5	2.1	2.2	1.8	2.1	2.5	2.3	2.7	4.6	1.9	2.6	2.6
S09	NeutralHumans_anger	34	female	90	337.5	7	3.63	2.75	19	18	22	16	5.4	4.2	4.9	1.5	2	1.3	1.4	1.3	5.3	4	4.2	1.9	2.1	1.4	1.9	1.1	3.4	3.4	2.1	3.1	1.5	2.6	2.4	2.6	3.5	4.5	2.1	2.2	1.8	2.1	2.5	2.3	2.7	4.6	1.9	2.6	2.6
S09	NeutralHumans_surprise	34	female	90	337.5	7	3.63	2.75	19	18	22	16	5.4	4.2	4.9	1.5	2	1.3	1.4	1.3	5.3	4	4.2	1.9	2.1	1.4	1.9	1.1	3.4	3.4	2.1	3.1	1.5	2.6	2.4	2.6	3.5	4.5	2.1	2.2	1.8	2.1	2.5	2.3	2.7	4.6	1.9	2.6	2.6
S09	Object_arousal	34	female	90	337.5	7	3.63	2.75	19	18	22	16	5.4	4.2	4.9	1.5	2	1.3	1.4	1.3	5.3	4	4.2	1.9	2.1	1.4	1.9	1.1	3.4	3.4	2.1	3.1	1.5	2.6	2.4	2.6	3.5	4.5	2.1	2.2	1.8	2.1	2.5	2.3	2.7	4.6	1.9	2.6	2.6
S09	Object_happiness	34	female	90	337.5	7	3.63	2.75	19	18	22	16	5.4	4.2	4.9	1.5	2	1.3	1.4	1.3	5.3	4	4.2	1.9	2.1	1.4	1.9	1.1	3.4	3.4	2.1	3.1	1.5	2.6	2.4	2.6	3.5	4.5	2.1	2.2	1.8	2.1	2.5	2.3	2.7	4.6	1.9	2.6	2.6
S09	Object_disgust	34	female	90	337.5	7	3.63	2.75	19	18	22	16	5.4	4.2	4.9	1.5	2	1.3	1.4	1.3	5.3	4	4.2	1.9	2.1	1.4	1.9	1.1	3.4	3.4	2.1	3.1	1.5	2.6	2.4	2.6	3.5	4.5	2.1	2.2	1.8	2.1	2.5	2.3	2.7	4.6	1.9	2.6	2.6
S09	Object_fear	34	female	90	337.5	7	3.63	2.75	19	18	22	16	5.4	4.2	4.9	1.5	2	1.3	1.4	1.3	5.3	4	4.2	1.9	2.1	1.4	1.9	1.1	3.4	3.4	2.1	3.1	1.5	2.6	2.4	2.6	3.5	4.5	2.1	2.2	1.8	2.1	2.5	2.3	2.7	4.6	1.9	2.6	2.6
S09	Object_sadness	34	female	90	337.5	7	3.63	2.75	19	18	22	16	5.4	4.2	4.9	1.5	2	1.3	1.4	1.3	5.3	4	4.2	1.9	2.1	1.4	1.9	1.1	3.4	3.4	2.1	3.1	1.5	2.6	2.4	2.6	3.5	4.5	2.1	2.2	1.8	2.1	2.5	2.3	2.7	4.6	1.9	2.6	2.6
S09	Object_valence	34	female	90	337.5	7	3.63	2.75	19	18	22	16	5.4	4.2	4.9	1.5	2	1.3	1.4	1.3	5.3	4	4.2	1.9	2.1	1.4	1.9	1.1	3.4	3.4	2.1	3.1	1.5	2.6	2.4	2.6	3.5	4.5	2.1	2.2	1.8	2.1	2.5	2.3	2.7	4.6	1.9	2.6	2.6
S09	Object_anger	34	female	90	337.5	7	3.63	2.75	19	18	22	16	5.4	4.2	4.9	1.5	2	1.3	1.4	1.3	5.3	4	4.2	1.9	2.1	1.4	1.9	1.1	3.4	3.4	2.1	3.1	1.5	2.6	2.4	2.6	3.5	4.5	2.1	2.2	1.8	2.1	2.5	2.3	2.7	4.6	1.9	2.6	2.6
S09	Object_surprise	34	female	90	337.5	7	3.63	2.75	19	18	22	16	5.4	4.2	4.9	1.5	2	1.3	1.4	1.3	5.3	4	4.2	1.9	2.1	1.4	1.9	1.1	3.4	3.4	2.1	3.1	1.5	2.6	2.4	2.6	3.5	4.5	2.1	2.2	1.8	2.1	2.5	2.3	2.7	4.6	1.9	2.6	2.6
S09	Pixel_arousal	34	female	90	337.5	7	3.63	2.75	19	18	22	16	5.4	4.2	4.9	1.5	2	1.3	1.4	1.3	5.3	4	4.2	1.9	2.1	1.4	1.9	1.1	3.4	3.4	2.1	3.1	1.5	2.6	2.4	2.6	3.5	4.5	2.1	2.2	1.8	2.1	2.5	2.3	2.7	4.6	1.9	2.6	2.6
S09	Pixel_happiness	34	female	90	337.5	7	3.63	2.75	19	18	22	16	5.4	4.2	4.9	1.5	2	1.3	1.4	1.3	5.3	4	4.2	1.9	2.1	1.4	1.9	1.1	3.4	3.4	2.1	3.1	1.5	2.6	2.4	2.6	3.5	4.5	2.1	2.2	1.8	2.1	2.5	2.3	2.7	4.6	1.9	2.6	2.6
S09	Pixel_disgust	34	female	90	337.5	7	3.63	2.75	19	18	22	16	5.4	4.2	4.9	1.5	2	1.3	1.4	1.3	5.3	4	4.2	1.9	2.1	1.4	1.9	1.1	3.4	3.4	2.1	3.1	1.5	2.6	2.4	2.6	3.5	4.5	2.1	2.2	1.8	2.1	2.5	2.3	2.7	4.6	1.9	2.6	2.6
S09	Pixel_fear	34	female	90	337.5	7	3.63	2.75	19	18	22	16	5.4	4.2	4.9	1.5	2	1.3	1.4	1.3	5.3	4	4.2	1.9	2.1	1.4	1.9	1.1	3.4	3.4	2.1	3.1	1.5	2.6	2.4	2.6	3.5	4.5	2.1	2.2	1.8	2.1	2.5	2.3	2.7	4.6	1.9	2.6	2.6
S09	Pixel_sadness	34	female	90	337.5	7	3.63	2.75	19	18	22	16	5.4	4.2	4.9	1.5	2	1.3	1.4	1.3	5.3	4	4.2	1.9	2.1	1.4	1.9	1.1	3.4	3.4	2.1	3.1	1.5	2.6	2.4	2.6	3.5	4.5	2.1	2.2	1.8	2.1	2.5	2.3	2.7	4.6	1.9	2.6	2.6
S09	Pixel_valence	34	female	90	337.5	7	3.63	2.75	19	18	22	16	5.4	4.2	4.9	1.5	2	1.3	1.4	1.3	5.3	4	4.2	1.9	2.1	1.4	1.9	1.1	3.4	3.4	2.1	3.1	1.5	2.6	2.4	2.6	3.5	4.5	2.1	2.2	1.8	2.1	2.5	2.3	2.7	4.6	1.9	2.6	2.6
S09	Pixel_anger	34	female	90	337.5	7	3.63	2.75	19	18	22	16	5.4	4.2	4.9	1.5	2	1.3	1.4	1.3	5.3	4	4.2	1.9	2.1	1.4	1.9	1.1	3.4	3.4	2.1	3.1	1.5	2.6	2.4	2.6	3.5	4.5	2.1	2.2	1.8	2.1	2.5	2.3	2.7	4.6	1.9	2.6	2.6
S09	Pixel_surprise	34	female	90	337.5	7	3.63	2.75	19	18	22	16	5.4	4.2	4.9	1.5	2	1.3	1.4	1.3	5.3	4	4.2	1.9	2.1	1.4	1.9	1.1	3.4	3.4	2.1	3.1	1.5	2.6	2.4	2.6	3.5	4.5	2.1	2.2	1.8	2.1	2.5	2.3	2.7	4.6	1.9	2.6	2.6
S10	ThreateningDogs_arousal	36	female	100	276	7	2.38	3.25	23	18	18	14	5.5	4.2	5.5	3.1	2.6	1.8	2.4	1.2	4.2	1.8	3.2	3.3	1.9	1.4	1.5	1.4	3.5	1.7	1.9	3.5	1.6	2.2	2.5	1.4	3.8	1.9	1.8	3.7	1.1	1.8	2.1	1.6	2.1	5.2	1.5	3.4	3.8
S10	ThreateningDogs_happiness	36	female	100	276	7	2.38	3.25	23	18	18	14	5.5	4.2	5.5	3.1	2.6	1.8	2.4	1.2	4.2	1.8	3.2	3.3	1.9	1.4	1.5	1.4	3.5	1.7	1.9	3.5	1.6	2.2	2.5	1.4	3.8	1.9	1.8	3.7	1.1	1.8	2.1	1.6	2.1	5.2	1.5	3.4	3.8
S10	ThreateningDogs_disgust	36	female	100	276	7	2.38	3.25	23	18	18	14	5.5	4.2	5.5	3.1	2.6	1.8	2.4	1.2	4.2	1.8	3.2	3.3	1.9	1.4	1.5	1.4	3.5	1.7	1.9	3.5	1.6	2.2	2.5	1.4	3.8	1.9	1.8	3.7	1.1	1.8	2.1	1.6	2.1	5.2	1.5	3.4	3.8
S10	ThreateningDogs_fear	36	female	100	276	7	2.38	3.25	23	18	18	14	5.5	4.2	5.5	3.1	2.6	1.8	2.4	1.2	4.2	1.8	3.2	3.3	1.9	1.4	1.5	1.4	3.5	1.7	1.9	3.5	1.6	2.2	2.5	1.4	3.8	1.9	1.8	3.7	1.1	1.8	2.1	1.6	2.1	5.2	1.5	3.4	3.8
S10	ThreateningDogs_sadness	36	female	100	276	7	2.38	3.25	23	18	18	14	5.5	4.2	5.5	3.1	2.6	1.8	2.4	1.2	4.2	1.8	3.2	3.3	1.9	1.4	1.5	1.4	3.5	1.7	1.9	3.5	1.6	2.2	2.5	1.4	3.8	1.9	1.8	3.7	1.1	1.8	2.1	1.6	2.1	5.2	1.5	3.4	3.8
S10	ThreateningDogs_valence	36	female	100	276	7	2.38	3.25	23	18	18	14	5.5	4.2	5.5	3.1	2.6	1.8	2.4	1.2	4.2	1.8	3.2	3.3	1.9	1.4	1.5	1.4	3.5	1.7	1.9	3.5	1.6	2.2	2.5	1.4	3.8	1.9	1.8	3.7	1.1	1.8	2.1	1.6	2.1	5.2	1.5	3.4	3.8
S10	ThreateningDogs_anger	36	female	100	276	7	2.38	3.25	23	18	18	14	5.5	4.2	5.5	3.1	2.6	1.8	2.4	1.2	4.2	1.8	3.2	3.3	1.9	1.4	1.5	1.4	3.5	1.7	1.9	3.5	1.6	2.2	2.5	1.4	3.8	1.9	1.8	3.7	1.1	1.8	2.1	1.6	2.1	5.2	1.5	3.4	3.8
S10	ThreateningDogs_surprise	36	female	100	276	7	2.38	3.25	23	18	18	14	5.5	4.2	5.5	3.1	2.6	1.8	2.4	1.2	4.2	1.8	3.2	3.3	1.9	1.4	1.5	1.4	3.5	1.7	1.9	3.5	1.6	2.2	2.5	1.4	3.8	1.9	1.8	3.7	1.1	1.8	2.1	1.6	2.1	5.2	1.5	3.4	3.8
S10	ThreateningHumans_arousal	36	female	100	276	7	2.38	3.25	23	18	18	14	5.5	4.2	5.5	3.1	2.6	1.8	2.4	1.2	4.2	1.8	3.2	3.3	1.9	1.4	1.5	1.4	3.5	1.7	1.9	3.5	1.6	2.2	2.5	1.4	3.8	1.9	1.8	3.7	1.1	1.8	2.1	1.6	2.1	5.2	1.5	3.4	3.8
S10	ThreateningHumans_happiness	36	female	100	276	7	2.38	3.25	23	18	18	14	5.5	4.2	5.5	3.1	2.6	1.8	2.4	1.2	4.2	1.8	3.2	3.3	1.9	1.4	1.5	1.4	3.5	1.7	1.9	3.5	1.6	2.2	2.5	1.4	3.8	1.9	1.8	3.7	1.1	1.8	2.1	1.6	2.1	5.2	1.5	3.4	3.8
S10	ThreateningHumans_disgust	36	female	100	276	7	2.38	3.25	23	18	18	14	5.5	4.2	5.5	3.1	2.6	1.8	2.4	1.2	4.2	1.8	3.2	3.3	1.9	1.4	1.5	1.4	3.5	1.7	1.9	3.5	1.6	2.2	2.5	1.4	3.8	1.9	1.8	3.7	1.1	1.8	2.1	1.6	2.1	5.2	1.5	3.4	3.8
S10	ThreateningHumans_fear	36	female	100	276	7	2.38	3.25	23	18	18	14	5.5	4.2	5.5	3.1	2.6	1.8	2.4	1.2	4.2	1.8	3.2	3.3	1.9	1.4	1.5	1.4	3.5	1.7	1.9	3.5	1.6	2.2	2.5	1.4	3.8	1.9	1.8	3.7	1.1	1.8	2.1	1.6	2.1	5.2	1.5	3.4	3.8
S10	ThreateningHumans_sadness	36	female	100	276	7	2.38	3.25	23	18	18	14	5.5	4.2	5.5	3.1	2.6	1.8	2.4	1.2	4.2	1.8	3.2	3.3	1.9	1.4	1.5	1.4	3.5	1.7	1.9	3.5	1.6	2.2	2.5	1.4	3.8	1.9	1.8	3.7	1.1	1.8	2.1	1.6	2.1	5.2	1.5	3.4	3.8
S10	ThreateningHumans_valence	36	female	100	276	7	2.38	3.25	23	18	18	14	5.5	4.2	5.5	3.1	2.6	1.8	2.4	1.2	4.2	1.8	3.2	3.3	1.9	1.4	1.5	1.4	3.5	1.7	1.9	3.5	1.6	2.2	2.5	1.4	3.8	1.9	1.8	3.7	1.1	1.8	2.1	1.6	2.1	5.2	1.5	3.4	3.8
S10	ThreateningHumans_anger	36	female	100	276	7	2.38	3.25	23	18	18	14	5.5	4.2	5.5	3.1	2.6	1.8	2.4	1.2	4.2	1.8	3.2	3.3	1.9	1.4	1.5	1.4	3.5	1.7	1.9	3.5	1.6	2.2	2.5	1.4	3.8	1.9	1.8	3.7	1.1	1.8	2.1	1.6	2.1	5.2	1.5	3.4	3.8
S10	ThreateningHumans_surprise	36	female	100	276	7	2.38	3.25	23	18	18	14	5.5	4.2	5.5	3.1	2.6	1.8	2.4	1.2	4.2	1.8	3.2	3.3	1.9	1.4	1.5	1.4	3.5	1.7	1.9	3.5	1.6	2.2	2.5	1.4	3.8	1.9	1.8	3.7	1.1	1.8	2.1	1.6	2.1	5.2	1.5	3.4	3.8
S10	PleasantDogs_arousal	36	female	100	276	7	2.38	3.25	23	18	18	14	5.5	4.2	5.5	3.1	2.6	1.8	2.4	1.2	4.2	1.8	3.2	3.3	1.9	1.4	1.5	1.4	3.5	1.7	1.9	3.5	1.6	2.2	2.5	1.4	3.8	1.9	1.8	3.7	1.1	1.8	2.1	1.6	2.1	5.2	1.5	3.4	3.8
S10	PleasantDogs_happiness	36	female	100	276	7	2.38	3.25	23	18	18	14	5.5	4.2	5.5	3.1	2.6	1.8	2.4	1.2	4.2	1.8	3.2	3.3	1.9	1.4	1.5	1.4	3.5	1.7	1.9	3.5	1.6	2.2	2.5	1.4	3.8	1.9	1.8	3.7	1.1	1.8	2.1	1.6	2.1	5.2	1.5	3.4	3.8
S10	PleasantDogs_disgust	36	female	100	276	7	2.38	3.25	23	18	18	14	5.5	4.2	5.5	3.1	2.6	1.8	2.4	1.2	4.2	1.8	3.2	3.3	1.9	1.4	1.5	1.4	3.5	1.7	1.9	3.5	1.6	2.2	2.5	1.4	3.8	1.9	1.8	3.7	1.1	1.8	2.1	1.6	2.1	5.2	1.5	3.4	3.8
S10	PleasantDogs_fear	36	female	100	276	7	2.38	3.25	23	18	18	14	5.5	4.2	5.5	3.1	2.6	1.8	2.4	1.2	4.2	1.8	3.2	3.3	1.9	1.4	1.5	1.4	3.5	1.7	1.9	3.5	1.6	2.2	2.5	1.4	3.8	1.9	1.8	3.7	1.1	1.8	2.1	1.6	2.1	5.2	1.5	3.4	3.8
S10	PleasantDogs_sadness	36	female	100	276	7	2.38	3.25	23	18	18	14	5.5	4.2	5.5	3.1	2.6	1.8	2.4	1.2	4.2	1.8	3.2	3.3	1.9	1.4	1.5	1.4	3.5	1.7	1.9	3.5	1.6	2.2	2.5	1.4	3.8	1.9	1.8	3.7	1.1	1.8	2.1	1.6	2.1	5.2	1.5	3.4	3.8
S10	PleasantDogs_valence	36	female	100	276	7	2.38	3.25	23	18	18	14	5.5	4.2	5.5	3.1	2.6	1.8	2.4	1.2	4.2	1.8	3.2	3.3	1.9	1.4	1.5	1.4	3.5	1.7	1.9	3.5	1.6	2.2	2.5	1.4	3.8	1.9	1.8	3.7	1.1	1.8	2.1	1.6	2.1	5.2	1.5	3.4	3.8
S10	PleasantDogs_anger	36	female	100	276	7	2.38	3.25	23	18	18	14	5.5	4.2	5.5	3.1	2.6	1.8	2.4	1.2	4.2	1.8	3.2	3.3	1.9	1.4	1.5	1.4	3.5	1.7	1.9	3.5	1.6	2.2	2.5	1.4	3.8	1.9	1.8	3.7	1.1	1.8	2.1	1.6	2.1	5.2	1.5	3.4	3.8
S10	PleasantDogs_surprise	36	female	100	276	7	2.38	3.25	23	18	18	14	5.5	4.2	5.5	3.1	2.6	1.8	2.4	1.2	4.2	1.8	3.2	3.3	1.9	1.4	1.5	1.4	3.5	1.7	1.9	3.5	1.6	2.2	2.5	1.4	3.8	1.9	1.8	3.7	1.1	1.8	2.1	1.6	2.1	5.2	1.5	3.4	3.8
S10	PleasantHumans_arousal	36	female	100	276	7	2.38	3.25	23	18	18	14	5.5	4.2	5.5	3.1	2.6	1.8	2.4	1.2	4.2	1.8	3.2	3.3	1.9	1.4	1.5	1.4	3.5	1.7	1.9	3.5	1.6	2.2	2.5	1.4	3.8	1.9	1.8	3.7	1.1	1.8	2.1	1.6	2.1	5.2	1.5	3.4	3.8
S10	PleasantHumans_happiness	36	female	100	276	7	2.38	3.25	23	18	18	14	5.5	4.2	5.5	3.1	2.6	1.8	2.4	1.2	4.2	1.8	3.2	3.3	1.9	1.4	1.5	1.4	3.5	1.7	1.9	3.5	1.6	2.2	2.5	1.4	3.8	1.9	1.8	3.7	1.1	1.8	2.1	1.6	2.1	5.2	1.5	3.4	3.8
S10	PleasantHumans_disgust	36	female	100	276	7	2.38	3.25	23	18	18	14	5.5	4.2	5.5	3.1	2.6	1.8	2.4	1.2	4.2	1.8	3.2	3.3	1.9	1.4	1.5	1.4	3.5	1.7	1.9	3.5	1.6	2.2	2.5	1.4	3.8	1.9	1.8	3.7	1.1	1.8	2.1	1.6	2.1	5.2	1.5	3.4	3.8
S10	PleasantHumans_fear	36	female	100	276	7	2.38	3.25	23	18	18	14	5.5	4.2	5.5	3.1	2.6	1.8	2.4	1.2	4.2	1.8	3.2	3.3	1.9	1.4	1.5	1.4	3.5	1.7	1.9	3.5	1.6	2.2	2.5	1.4	3.8	1.9	1.8	3.7	1.1	1.8	2.1	1.6	2.1	5.2	1.5	3.4	3.8
S10	PleasantHumans_sadness	36	female	100	276	7	2.38	3.25	23	18	18	14	5.5	4.2	5.5	3.1	2.6	1.8	2.4	1.2	4.2	1.8	3.2	3.3	1.9	1.4	1.5	1.4	3.5	1.7	1.9	3.5	1.6	2.2	2.5	1.4	3.8	1.9	1.8	3.7	1.1	1.8	2.1	1.6	2.1	5.2	1.5	3.4	3.8
S10	PleasantHumans_valence	36	female	100	276	7	2.38	3.25	23	18	18	14	5.5	4.2	5.5	3.1	2.6	1.8	2.4	1.2	4.2	1.8	3.2	3.3	1.9	1.4	1.5	1.4	3.5	1.7	1.9	3.5	1.6	2.2	2.5	1.4	3.8	1.9	1.8	3.7	1.1	1.8	2.1	1.6	2.1	5.2	1.5	3.4	3.8
S10	PleasantHumans_anger	36	female	100	276	7	2.38	3.25	23	18	18	14	5.5	4.2	5.5	3.1	2.6	1.8	2.4	1.2	4.2	1.8	3.2	3.3	1.9	1.4	1.5	1.4	3.5	1.7	1.9	3.5	1.6	2.2	2.5	1.4	3.8	1.9	1.8	3.7	1.1	1.8	2.1	1.6	2.1	5.2	1.5	3.4	3.8
S10	PleasantHumans_surprise	36	female	100	276	7	2.38	3.25	23	18	18	14	5.5	4.2	5.5	3.1	2.6	1.8	2.4	1.2	4.2	1.8	3.2	3.3	1.9	1.4	1.5	1.4	3.5	1.7	1.9	3.5	1.6	2.2	2.5	1.4	3.8	1.9	1.8	3.7	1.1	1.8	2.1	1.6	2.1	5.2	1.5	3.4	3.8
S10	NeutralDogs_arousal	36	female	100	276	7	2.38	3.25	23	18	18	14	5.5	4.2	5.5	3.1	2.6	1.8	2.4	1.2	4.2	1.8	3.2	3.3	1.9	1.4	1.5	1.4	3.5	1.7	1.9	3.5	1.6	2.2	2.5	1.4	3.8	1.9	1.8	3.7	1.1	1.8	2.1	1.6	2.1	5.2	1.5	3.4	3.8
S10	NeutralDogs_happiness	36	female	100	276	7	2.38	3.25	23	18	18	14	5.5	4.2	5.5	3.1	2.6	1.8	2.4	1.2	4.2	1.8	3.2	3.3	1.9	1.4	1.5	1.4	3.5	1.7	1.9	3.5	1.6	2.2	2.5	1.4	3.8	1.9	1.8	3.7	1.1	1.8	2.1	1.6	2.1	5.2	1.5	3.4	3.8
S10	NeutralDogs_disgust	36	female	100	276	7	2.38	3.25	23	18	18	14	5.5	4.2	5.5	3.1	2.6	1.8	2.4	1.2	4.2	1.8	3.2	3.3	1.9	1.4	1.5	1.4	3.5	1.7	1.9	3.5	1.6	2.2	2.5	1.4	3.8	1.9	1.8	3.7	1.1	1.8	2.1	1.6	2.1	5.2	1.5	3.4	3.8
S10	NeutralDogs_fear	36	female	100	276	7	2.38	3.25	23	18	18	14	5.5	4.2	5.5	3.1	2.6	1.8	2.4	1.2	4.2	1.8	3.2	3.3	1.9	1.4	1.5	1.4	3.5	1.7	1.9	3.5	1.6	2.2	2.5	1.4	3.8	1.9	1.8	3.7	1.1	1.8	2.1	1.6	2.1	5.2	1.5	3.4	3.8
S10	NeutralDogs_sadness	36	female	100	276	7	2.38	3.25	23	18	18	14	5.5	4.2	5.5	3.1	2.6	1.8	2.4	1.2	4.2	1.8	3.2	3.3	1.9	1.4	1.5	1.4	3.5	1.7	1.9	3.5	1.6	2.2	2.5	1.4	3.8	1.9	1.8	3.7	1.1	1.8	2.1	1.6	2.1	5.2	1.5	3.4	3.8
S10	NeutralDogs_valence	36	female	100	276	7	2.38	3.25	23	18	18	14	5.5	4.2	5.5	3.1	2.6	1.8	2.4	1.2	4.2	1.8	3.2	3.3	1.9	1.4	1.5	1.4	3.5	1.7	1.9	3.5	1.6	2.2	2.5	1.4	3.8	1.9	1.8	3.7	1.1	1.8	2.1	1.6	2.1	5.2	1.5	3.4	3.8
S10	NeutralDogs_anger	36	female	100	276	7	2.38	3.25	23	18	18	14	5.5	4.2	5.5	3.1	2.6	1.8	2.4	1.2	4.2	1.8	3.2	3.3	1.9	1.4	1.5	1.4	3.5	1.7	1.9	3.5	1.6	2.2	2.5	1.4	3.8	1.9	1.8	3.7	1.1	1.8	2.1	1.6	2.1	5.2	1.5	3.4	3.8
S10	NeutralDogs_surprise	36	female	100	276	7	2.38	3.25	23	18	18	14	5.5	4.2	5.5	3.1	2.6	1.8	2.4	1.2	4.2	1.8	3.2	3.3	1.9	1.4	1.5	1.4	3.5	1.7	1.9	3.5	1.6	2.2	2.5	1.4	3.8	1.9	1.8	3.7	1.1	1.8	2.1	1.6	2.1	5.2	1.5	3.4	3.8
S10	NeutralHumans_arousal	36	female	100	276	7	2.38	3.25	23	18	18	14	5.5	4.2	5.5	3.1	2.6	1.8	2.4	1.2	4.2	1.8	3.2	3.3	1.9	1.4	1.5	1.4	3.5	1.7	1.9	3.5	1.6	2.2	2.5	1.4	3.8	1.9	1.8	3.7	1.1	1.8	2.1	1.6	2.1	5.2	1.5	3.4	3.8
S10	NeutralHumans_happiness	36	female	100	276	7	2.38	3.25	23	18	18	14	5.5	4.2	5.5	3.1	2.6	1.8	2.4	1.2	4.2	1.8	3.2	3.3	1.9	1.4	1.5	1.4	3.5	1.7	1.9	3.5	1.6	2.2	2.5	1.4	3.8	1.9	1.8	3.7	1.1	1.8	2.1	1.6	2.1	5.2	1.5	3.4	3.8
S10	NeutralHumans_disgust	36	female	100	276	7	2.38	3.25	23	18	18	14	5.5	4.2	5.5	3.1	2.6	1.8	2.4	1.2	4.2	1.8	3.2	3.3	1.9	1.4	1.5	1.4	3.5	1.7	1.9	3.5	1.6	2.2	2.5	1.4	3.8	1.9	1.8	3.7	1.1	1.8	2.1	1.6	2.1	5.2	1.5	3.4	3.8
S10	NeutralHumans_fear	36	female	100	276	7	2.38	3.25	23	18	18	14	5.5	4.2	5.5	3.1	2.6	1.8	2.4	1.2	4.2	1.8	3.2	3.3	1.9	1.4	1.5	1.4	3.5	1.7	1.9	3.5	1.6	2.2	2.5	1.4	3.8	1.9	1.8	3.7	1.1	1.8	2.1	1.6	2.1	5.2	1.5	3.4	3.8
S10	NeutralHumans_sadness	36	female	100	276	7	2.38	3.25	23	18	18	14	5.5	4.2	5.5	3.1	2.6	1.8	2.4	1.2	4.2	1.8	3.2	3.3	1.9	1.4	1.5	1.4	3.5	1.7	1.9	3.5	1.6	2.2	2.5	1.4	3.8	1.9	1.8	3.7	1.1	1.8	2.1	1.6	2.1	5.2	1.5	3.4	3.8
S10	NeutralHumans_valence	36	female	100	276	7	2.38	3.25	23	18	18	14	5.5	4.2	5.5	3.1	2.6	1.8	2.4	1.2	4.2	1.8	3.2	3.3	1.9	1.4	1.5	1.4	3.5	1.7	1.9	3.5	1.6	2.2	2.5	1.4	3.8	1.9	1.8	3.7	1.1	1.8	2.1	1.6	2.1	5.2	1.5	3.4	3.8
S10	NeutralHumans_anger	36	female	100	276	7	2.38	3.25	23	18	18	14	5.5	4.2	5.5	3.1	2.6	1.8	2.4	1.2	4.2	1.8	3.2	3.3	1.9	1.4	1.5	1.4	3.5	1.7	1.9	3.5	1.6	2.2	2.5	1.4	3.8	1.9	1.8	3.7	1.1	1.8	2.1	1.6	2.1	5.2	1.5	3.4	3.8
S10	NeutralHumans_surprise	36	female	100	276	7	2.38	3.25	23	18	18	14	5.5	4.2	5.5	3.1	2.6	1.8	2.4	1.2	4.2	1.8	3.2	3.3	1.9	1.4	1.5	1.4	3.5	1.7	1.9	3.5	1.6	2.2	2.5	1.4	3.8	1.9	1.8	3.7	1.1	1.8	2.1	1.6	2.1	5.2	1.5	3.4	3.8
S10	Object_arousal	36	female	100	276	7	2.38	3.25	23	18	18	14	5.5	4.2	5.5	3.1	2.6	1.8	2.4	1.2	4.2	1.8	3.2	3.3	1.9	1.4	1.5	1.4	3.5	1.7	1.9	3.5	1.6	2.2	2.5	1.4	3.8	1.9	1.8	3.7	1.1	1.8	2.1	1.6	2.1	5.2	1.5	3.4	3.8
S10	Object_happiness	36	female	100	276	7	2.38	3.25	23	18	18	14	5.5	4.2	5.5	3.1	2.6	1.8	2.4	1.2	4.2	1.8	3.2	3.3	1.9	1.4	1.5	1.4	3.5	1.7	1.9	3.5	1.6	2.2	2.5	1.4	3.8	1.9	1.8	3.7	1.1	1.8	2.1	1.6	2.1	5.2	1.5	3.4	3.8
S10	Object_disgust	36	female	100	276	7	2.38	3.25	23	18	18	14	5.5	4.2	5.5	3.1	2.6	1.8	2.4	1.2	4.2	1.8	3.2	3.3	1.9	1.4	1.5	1.4	3.5	1.7	1.9	3.5	1.6	2.2	2.5	1.4	3.8	1.9	1.8	3.7	1.1	1.8	2.1	1.6	2.1	5.2	1.5	3.4	3.8
S10	Object_fear	36	female	100	276	7	2.38	3.25	23	18	18	14	5.5	4.2	5.5	3.1	2.6	1.8	2.4	1.2	4.2	1.8	3.2	3.3	1.9	1.4	1.5	1.4	3.5	1.7	1.9	3.5	1.6	2.2	2.5	1.4	3.8	1.9	1.8	3.7	1.1	1.8	2.1	1.6	2.1	5.2	1.5	3.4	3.8
S10	Object_sadness	36	female	100	276	7	2.38	3.25	23	18	18	14	5.5	4.2	5.5	3.1	2.6	1.8	2.4	1.2	4.2	1.8	3.2	3.3	1.9	1.4	1.5	1.4	3.5	1.7	1.9	3.5	1.6	2.2	2.5	1.4	3.8	1.9	1.8	3.7	1.1	1.8	2.1	1.6	2.1	5.2	1.5	3.4	3.8
S10	Object_valence	36	female	100	276	7	2.38	3.25	23	18	18	14	5.5	4.2	5.5	3.1	2.6	1.8	2.4	1.2	4.2	1.8	3.2	3.3	1.9	1.4	1.5	1.4	3.5	1.7	1.9	3.5	1.6	2.2	2.5	1.4	3.8	1.9	1.8	3.7	1.1	1.8	2.1	1.6	2.1	5.2	1.5	3.4	3.8
S10	Object_anger	36	female	100	276	7	2.38	3.25	23	18	18	14	5.5	4.2	5.5	3.1	2.6	1.8	2.4	1.2	4.2	1.8	3.2	3.3	1.9	1.4	1.5	1.4	3.5	1.7	1.9	3.5	1.6	2.2	2.5	1.4	3.8	1.9	1.8	3.7	1.1	1.8	2.1	1.6	2.1	5.2	1.5	3.4	3.8
S10	Object_surprise	36	female	100	276	7	2.38	3.25	23	18	18	14	5.5	4.2	5.5	3.1	2.6	1.8	2.4	1.2	4.2	1.8	3.2	3.3	1.9	1.4	1.5	1.4	3.5	1.7	1.9	3.5	1.6	2.2	2.5	1.4	3.8	1.9	1.8	3.7	1.1	1.8	2.1	1.6	2.1	5.2	1.5	3.4	3.8
S10	Pixel_arousal	36	female	100	276	7	2.38	3.25	23	18	18	14	5.5	4.2	5.5	3.1	2.6	1.8	2.4	1.2	4.2	1.8	3.2	3.3	1.9	1.4	1.5	1.4	3.5	1.7	1.9	3.5	1.6	2.2	2.5	1.4	3.8	1.9	1.8	3.7	1.1	1.8	2.1	1.6	2.1	5.2	1.5	3.4	3.8
S10	Pixel_happiness	36	female	100	276	7	2.38	3.25	23	18	18	14	5.5	4.2	5.5	3.1	2.6	1.8	2.4	1.2	4.2	1.8	3.2	3.3	1.9	1.4	1.5	1.4	3.5	1.7	1.9	3.5	1.6	2.2	2.5	1.4	3.8	1.9	1.8	3.7	1.1	1.8	2.1	1.6	2.1	5.2	1.5	3.4	3.8
S10	Pixel_disgust	36	female	100	276	7	2.38	3.25	23	18	18	14	5.5	4.2	5.5	3.1	2.6	1.8	2.4	1.2	4.2	1.8	3.2	3.3	1.9	1.4	1.5	1.4	3.5	1.7	1.9	3.5	1.6	2.2	2.5	1.4	3.8	1.9	1.8	3.7	1.1	1.8	2.1	1.6	2.1	5.2	1.5	3.4	3.8
S10	Pixel_fear	36	female	100	276	7	2.38	3.25	23	18	18	14	5.5	4.2	5.5	3.1	2.6	1.8	2.4	1.2	4.2	1.8	3.2	3.3	1.9	1.4	1.5	1.4	3.5	1.7	1.9	3.5	1.6	2.2	2.5	1.4	3.8	1.9	1.8	3.7	1.1	1.8	2.1	1.6	2.1	5.2	1.5	3.4	3.8
S10	Pixel_sadness	36	female	100	276	7	2.38	3.25	23	18	18	14	5.5	4.2	5.5	3.1	2.6	1.8	2.4	1.2	4.2	1.8	3.2	3.3	1.9	1.4	1.5	1.4	3.5	1.7	1.9	3.5	1.6	2.2	2.5	1.4	3.8	1.9	1.8	3.7	1.1	1.8	2.1	1.6	2.1	5.2	1.5	3.4	3.8
S10	Pixel_valence	36	female	100	276	7	2.38	3.25	23	18	18	14	5.5	4.2	5.5	3.1	2.6	1.8	2.4	1.2	4.2	1.8	3.2	3.3	1.9	1.4	1.5	1.4	3.5	1.7	1.9	3.5	1.6	2.2	2.5	1.4	3.8	1.9	1.8	3.7	1.1	1.8	2.1	1.6	2.1	5.2	1.5	3.4	3.8
S10	Pixel_anger	36	female	100	276	7	2.38	3.25	23	18	18	14	5.5	4.2	5.5	3.1	2.6	1.8	2.4	1.2	4.2	1.8	3.2	3.3	1.9	1.4	1.5	1.4	3.5	1.7	1.9	3.5	1.6	2.2	2.5	1.4	3.8	1.9	1.8	3.7	1.1	1.8	2.1	1.6	2.1	5.2	1.5	3.4	3.8
S10	Pixel_surprise	36	female	100	276	7	2.38	3.25	23	18	18	14	5.5	4.2	5.5	3.1	2.6	1.8	2.4	1.2	4.2	1.8	3.2	3.3	1.9	1.4	1.5	1.4	3.5	1.7	1.9	3.5	1.6	2.2	2.5	1.4	3.8	1.9	1.8	3.7	1.1	1.8	2.1	1.6	2.1	5.2	1.5	3.4	3.8
S11	ThreateningDogs_arousal	36	male	70	306.5	1	3.25	2	19	20	22	20	5.3	3.7	5.3	1.4	2.4	1.1	1.2	1.3	5.2	3.2	5.1	1.9	2.7	1	1.4	1.2	3.5	2.8	1.7	3.3	2.1	1.9	1.9	2.2	3.6	2.3	1.9	3.3	2.2	1.9	2.7	2.3	2.5	5.5	1.4	2.5	3.6
S11	ThreateningDogs_happiness	36	male	70	306.5	1	3.25	2	19	20	22	20	5.3	3.7	5.3	1.4	2.4	1.1	1.2	1.3	5.2	3.2	5.1	1.9	2.7	1	1.4	1.2	3.5	2.8	1.7	3.3	2.1	1.9	1.9	2.2	3.6	2.3	1.9	3.3	2.2	1.9	2.7	2.3	2.5	5.5	1.4	2.5	3.6
S11	ThreateningDogs_disgust	36	male	70	306.5	1	3.25	2	19	20	22	20	5.3	3.7	5.3	1.4	2.4	1.1	1.2	1.3	5.2	3.2	5.1	1.9	2.7	1	1.4	1.2	3.5	2.8	1.7	3.3	2.1	1.9	1.9	2.2	3.6	2.3	1.9	3.3	2.2	1.9	2.7	2.3	2.5	5.5	1.4	2.5	3.6
S11	ThreateningDogs_fear	36	male	70	306.5	1	3.25	2	19	20	22	20	5.3	3.7	5.3	1.4	2.4	1.1	1.2	1.3	5.2	3.2	5.1	1.9	2.7	1	1.4	1.2	3.5	2.8	1.7	3.3	2.1	1.9	1.9	2.2	3.6	2.3	1.9	3.3	2.2	1.9	2.7	2.3	2.5	5.5	1.4	2.5	3.6
S11	ThreateningDogs_sadness	36	male	70	306.5	1	3.25	2	19	20	22	20	5.3	3.7	5.3	1.4	2.4	1.1	1.2	1.3	5.2	3.2	5.1	1.9	2.7	1	1.4	1.2	3.5	2.8	1.7	3.3	2.1	1.9	1.9	2.2	3.6	2.3	1.9	3.3	2.2	1.9	2.7	2.3	2.5	5.5	1.4	2.5	3.6
S11	ThreateningDogs_valence	36	male	70	306.5	1	3.25	2	19	20	22	20	5.3	3.7	5.3	1.4	2.4	1.1	1.2	1.3	5.2	3.2	5.1	1.9	2.7	1	1.4	1.2	3.5	2.8	1.7	3.3	2.1	1.9	1.9	2.2	3.6	2.3	1.9	3.3	2.2	1.9	2.7	2.3	2.5	5.5	1.4	2.5	3.6
S11	ThreateningDogs_anger	36	male	70	306.5	1	3.25	2	19	20	22	20	5.3	3.7	5.3	1.4	2.4	1.1	1.2	1.3	5.2	3.2	5.1	1.9	2.7	1	1.4	1.2	3.5	2.8	1.7	3.3	2.1	1.9	1.9	2.2	3.6	2.3	1.9	3.3	2.2	1.9	2.7	2.3	2.5	5.5	1.4	2.5	3.6
S11	ThreateningDogs_surprise	36	male	70	306.5	1	3.25	2	19	20	22	20	5.3	3.7	5.3	1.4	2.4	1.1	1.2	1.3	5.2	3.2	5.1	1.9	2.7	1	1.4	1.2	3.5	2.8	1.7	3.3	2.1	1.9	1.9	2.2	3.6	2.3	1.9	3.3	2.2	1.9	2.7	2.3	2.5	5.5	1.4	2.5	3.6
S11	ThreateningHumans_arousal	36	male	70	306.5	1	3.25	2	19	20	22	20	5.3	3.7	5.3	1.4	2.4	1.1	1.2	1.3	5.2	3.2	5.1	1.9	2.7	1	1.4	1.2	3.5	2.8	1.7	3.3	2.1	1.9	1.9	2.2	3.6	2.3	1.9	3.3	2.2	1.9	2.7	2.3	2.5	5.5	1.4	2.5	3.6
S11	ThreateningHumans_happiness	36	male	70	306.5	1	3.25	2	19	20	22	20	5.3	3.7	5.3	1.4	2.4	1.1	1.2	1.3	5.2	3.2	5.1	1.9	2.7	1	1.4	1.2	3.5	2.8	1.7	3.3	2.1	1.9	1.9	2.2	3.6	2.3	1.9	3.3	2.2	1.9	2.7	2.3	2.5	5.5	1.4	2.5	3.6
S11	ThreateningHumans_disgust	36	male	70	306.5	1	3.25	2	19	20	22	20	5.3	3.7	5.3	1.4	2.4	1.1	1.2	1.3	5.2	3.2	5.1	1.9	2.7	1	1.4	1.2	3.5	2.8	1.7	3.3	2.1	1.9	1.9	2.2	3.6	2.3	1.9	3.3	2.2	1.9	2.7	2.3	2.5	5.5	1.4	2.5	3.6
S11	ThreateningHumans_fear	36	male	70	306.5	1	3.25	2	19	20	22	20	5.3	3.7	5.3	1.4	2.4	1.1	1.2	1.3	5.2	3.2	5.1	1.9	2.7	1	1.4	1.2	3.5	2.8	1.7	3.3	2.1	1.9	1.9	2.2	3.6	2.3	1.9	3.3	2.2	1.9	2.7	2.3	2.5	5.5	1.4	2.5	3.6
S11	ThreateningHumans_sadness	36	male	70	306.5	1	3.25	2	19	20	22	20	5.3	3.7	5.3	1.4	2.4	1.1	1.2	1.3	5.2	3.2	5.1	1.9	2.7	1	1.4	1.2	3.5	2.8	1.7	3.3	2.1	1.9	1.9	2.2	3.6	2.3	1.9	3.3	2.2	1.9	2.7	2.3	2.5	5.5	1.4	2.5	3.6
S11	ThreateningHumans_valence	36	male	70	306.5	1	3.25	2	19	20	22	20	5.3	3.7	5.3	1.4	2.4	1.1	1.2	1.3	5.2	3.2	5.1	1.9	2.7	1	1.4	1.2	3.5	2.8	1.7	3.3	2.1	1.9	1.9	2.2	3.6	2.3	1.9	3.3	2.2	1.9	2.7	2.3	2.5	5.5	1.4	2.5	3.6
S11	ThreateningHumans_anger	36	male	70	306.5	1	3.25	2	19	20	22	20	5.3	3.7	5.3	1.4	2.4	1.1	1.2	1.3	5.2	3.2	5.1	1.9	2.7	1	1.4	1.2	3.5	2.8	1.7	3.3	2.1	1.9	1.9	2.2	3.6	2.3	1.9	3.3	2.2	1.9	2.7	2.3	2.5	5.5	1.4	2.5	3.6
S11	ThreateningHumans_surprise	36	male	70	306.5	1	3.25	2	19	20	22	20	5.3	3.7	5.3	1.4	2.4	1.1	1.2	1.3	5.2	3.2	5.1	1.9	2.7	1	1.4	1.2	3.5	2.8	1.7	3.3	2.1	1.9	1.9	2.2	3.6	2.3	1.9	3.3	2.2	1.9	2.7	2.3	2.5	5.5	1.4	2.5	3.6
S11	PleasantDogs_arousal	36	male	70	306.5	1	3.25	2	19	20	22	20	5.3	3.7	5.3	1.4	2.4	1.1	1.2	1.3	5.2	3.2	5.1	1.9	2.7	1	1.4	1.2	3.5	2.8	1.7	3.3	2.1	1.9	1.9	2.2	3.6	2.3	1.9	3.3	2.2	1.9	2.7	2.3	2.5	5.5	1.4	2.5	3.6
S11	PleasantDogs_happiness	36	male	70	306.5	1	3.25	2	19	20	22	20	5.3	3.7	5.3	1.4	2.4	1.1	1.2	1.3	5.2	3.2	5.1	1.9	2.7	1	1.4	1.2	3.5	2.8	1.7	3.3	2.1	1.9	1.9	2.2	3.6	2.3	1.9	3.3	2.2	1.9	2.7	2.3	2.5	5.5	1.4	2.5	3.6
S11	PleasantDogs_disgust	36	male	70	306.5	1	3.25	2	19	20	22	20	5.3	3.7	5.3	1.4	2.4	1.1	1.2	1.3	5.2	3.2	5.1	1.9	2.7	1	1.4	1.2	3.5	2.8	1.7	3.3	2.1	1.9	1.9	2.2	3.6	2.3	1.9	3.3	2.2	1.9	2.7	2.3	2.5	5.5	1.4	2.5	3.6
S11	PleasantDogs_fear	36	male	70	306.5	1	3.25	2	19	20	22	20	5.3	3.7	5.3	1.4	2.4	1.1	1.2	1.3	5.2	3.2	5.1	1.9	2.7	1	1.4	1.2	3.5	2.8	1.7	3.3	2.1	1.9	1.9	2.2	3.6	2.3	1.9	3.3	2.2	1.9	2.7	2.3	2.5	5.5	1.4	2.5	3.6
S11	PleasantDogs_sadness	36	male	70	306.5	1	3.25	2	19	20	22	20	5.3	3.7	5.3	1.4	2.4	1.1	1.2	1.3	5.2	3.2	5.1	1.9	2.7	1	1.4	1.2	3.5	2.8	1.7	3.3	2.1	1.9	1.9	2.2	3.6	2.3	1.9	3.3	2.2	1.9	2.7	2.3	2.5	5.5	1.4	2.5	3.6
S11	PleasantDogs_valence	36	male	70	306.5	1	3.25	2	19	20	22	20	5.3	3.7	5.3	1.4	2.4	1.1	1.2	1.3	5.2	3.2	5.1	1.9	2.7	1	1.4	1.2	3.5	2.8	1.7	3.3	2.1	1.9	1.9	2.2	3.6	2.3	1.9	3.3	2.2	1.9	2.7	2.3	2.5	5.5	1.4	2.5	3.6
S11	PleasantDogs_anger	36	male	70	306.5	1	3.25	2	19	20	22	20	5.3	3.7	5.3	1.4	2.4	1.1	1.2	1.3	5.2	3.2	5.1	1.9	2.7	1	1.4	1.2	3.5	2.8	1.7	3.3	2.1	1.9	1.9	2.2	3.6	2.3	1.9	3.3	2.2	1.9	2.7	2.3	2.5	5.5	1.4	2.5	3.6
S11	PleasantDogs_surprise	36	male	70	306.5	1	3.25	2	19	20	22	20	5.3	3.7	5.3	1.4	2.4	1.1	1.2	1.3	5.2	3.2	5.1	1.9	2.7	1	1.4	1.2	3.5	2.8	1.7	3.3	2.1	1.9	1.9	2.2	3.6	2.3	1.9	3.3	2.2	1.9	2.7	2.3	2.5	5.5	1.4	2.5	3.6
S11	PleasantHumans_arousal	36	male	70	306.5	1	3.25	2	19	20	22	20	5.3	3.7	5.3	1.4	2.4	1.1	1.2	1.3	5.2	3.2	5.1	1.9	2.7	1	1.4	1.2	3.5	2.8	1.7	3.3	2.1	1.9	1.9	2.2	3.6	2.3	1.9	3.3	2.2	1.9	2.7	2.3	2.5	5.5	1.4	2.5	3.6
S11	PleasantHumans_happiness	36	male	70	306.5	1	3.25	2	19	20	22	20	5.3	3.7	5.3	1.4	2.4	1.1	1.2	1.3	5.2	3.2	5.1	1.9	2.7	1	1.4	1.2	3.5	2.8	1.7	3.3	2.1	1.9	1.9	2.2	3.6	2.3	1.9	3.3	2.2	1.9	2.7	2.3	2.5	5.5	1.4	2.5	3.6
S11	PleasantHumans_disgust	36	male	70	306.5	1	3.25	2	19	20	22	20	5.3	3.7	5.3	1.4	2.4	1.1	1.2	1.3	5.2	3.2	5.1	1.9	2.7	1	1.4	1.2	3.5	2.8	1.7	3.3	2.1	1.9	1.9	2.2	3.6	2.3	1.9	3.3	2.2	1.9	2.7	2.3	2.5	5.5	1.4	2.5	3.6
S11	PleasantHumans_fear	36	male	70	306.5	1	3.25	2	19	20	22	20	5.3	3.7	5.3	1.4	2.4	1.1	1.2	1.3	5.2	3.2	5.1	1.9	2.7	1	1.4	1.2	3.5	2.8	1.7	3.3	2.1	1.9	1.9	2.2	3.6	2.3	1.9	3.3	2.2	1.9	2.7	2.3	2.5	5.5	1.4	2.5	3.6
S11	PleasantHumans_sadness	36	male	70	306.5	1	3.25	2	19	20	22	20	5.3	3.7	5.3	1.4	2.4	1.1	1.2	1.3	5.2	3.2	5.1	1.9	2.7	1	1.4	1.2	3.5	2.8	1.7	3.3	2.1	1.9	1.9	2.2	3.6	2.3	1.9	3.3	2.2	1.9	2.7	2.3	2.5	5.5	1.4	2.5	3.6
S11	PleasantHumans_valence	36	male	70	306.5	1	3.25	2	19	20	22	20	5.3	3.7	5.3	1.4	2.4	1.1	1.2	1.3	5.2	3.2	5.1	1.9	2.7	1	1.4	1.2	3.5	2.8	1.7	3.3	2.1	1.9	1.9	2.2	3.6	2.3	1.9	3.3	2.2	1.9	2.7	2.3	2.5	5.5	1.4	2.5	3.6
S11	PleasantHumans_anger	36	male	70	306.5	1	3.25	2	19	20	22	20	5.3	3.7	5.3	1.4	2.4	1.1	1.2	1.3	5.2	3.2	5.1	1.9	2.7	1	1.4	1.2	3.5	2.8	1.7	3.3	2.1	1.9	1.9	2.2	3.6	2.3	1.9	3.3	2.2	1.9	2.7	2.3	2.5	5.5	1.4	2.5	3.6
S11	PleasantHumans_surprise	36	male	70	306.5	1	3.25	2	19	20	22	20	5.3	3.7	5.3	1.4	2.4	1.1	1.2	1.3	5.2	3.2	5.1	1.9	2.7	1	1.4	1.2	3.5	2.8	1.7	3.3	2.1	1.9	1.9	2.2	3.6	2.3	1.9	3.3	2.2	1.9	2.7	2.3	2.5	5.5	1.4	2.5	3.6
S11	NeutralDogs_arousal	36	male	70	306.5	1	3.25	2	19	20	22	20	5.3	3.7	5.3	1.4	2.4	1.1	1.2	1.3	5.2	3.2	5.1	1.9	2.7	1	1.4	1.2	3.5	2.8	1.7	3.3	2.1	1.9	1.9	2.2	3.6	2.3	1.9	3.3	2.2	1.9	2.7	2.3	2.5	5.5	1.4	2.5	3.6
S11	NeutralDogs_happiness	36	male	70	306.5	1	3.25	2	19	20	22	20	5.3	3.7	5.3	1.4	2.4	1.1	1.2	1.3	5.2	3.2	5.1	1.9	2.7	1	1.4	1.2	3.5	2.8	1.7	3.3	2.1	1.9	1.9	2.2	3.6	2.3	1.9	3.3	2.2	1.9	2.7	2.3	2.5	5.5	1.4	2.5	3.6
S11	NeutralDogs_disgust	36	male	70	306.5	1	3.25	2	19	20	22	20	5.3	3.7	5.3	1.4	2.4	1.1	1.2	1.3	5.2	3.2	5.1	1.9	2.7	1	1.4	1.2	3.5	2.8	1.7	3.3	2.1	1.9	1.9	2.2	3.6	2.3	1.9	3.3	2.2	1.9	2.7	2.3	2.5	5.5	1.4	2.5	3.6
S11	NeutralDogs_fear	36	male	70	306.5	1	3.25	2	19	20	22	20	5.3	3.7	5.3	1.4	2.4	1.1	1.2	1.3	5.2	3.2	5.1	1.9	2.7	1	1.4	1.2	3.5	2.8	1.7	3.3	2.1	1.9	1.9	2.2	3.6	2.3	1.9	3.3	2.2	1.9	2.7	2.3	2.5	5.5	1.4	2.5	3.6
S11	NeutralDogs_sadness	36	male	70	306.5	1	3.25	2	19	20	22	20	5.3	3.7	5.3	1.4	2.4	1.1	1.2	1.3	5.2	3.2	5.1	1.9	2.7	1	1.4	1.2	3.5	2.8	1.7	3.3	2.1	1.9	1.9	2.2	3.6	2.3	1.9	3.3	2.2	1.9	2.7	2.3	2.5	5.5	1.4	2.5	3.6
S11	NeutralDogs_valence	36	male	70	306.5	1	3.25	2	19	20	22	20	5.3	3.7	5.3	1.4	2.4	1.1	1.2	1.3	5.2	3.2	5.1	1.9	2.7	1	1.4	1.2	3.5	2.8	1.7	3.3	2.1	1.9	1.9	2.2	3.6	2.3	1.9	3.3	2.2	1.9	2.7	2.3	2.5	5.5	1.4	2.5	3.6
S11	NeutralDogs_anger	36	male	70	306.5	1	3.25	2	19	20	22	20	5.3	3.7	5.3	1.4	2.4	1.1	1.2	1.3	5.2	3.2	5.1	1.9	2.7	1	1.4	1.2	3.5	2.8	1.7	3.3	2.1	1.9	1.9	2.2	3.6	2.3	1.9	3.3	2.2	1.9	2.7	2.3	2.5	5.5	1.4	2.5	3.6
S11	NeutralDogs_surprise	36	male	70	306.5	1	3.25	2	19	20	22	20	5.3	3.7	5.3	1.4	2.4	1.1	1.2	1.3	5.2	3.2	5.1	1.9	2.7	1	1.4	1.2	3.5	2.8	1.7	3.3	2.1	1.9	1.9	2.2	3.6	2.3	1.9	3.3	2.2	1.9	2.7	2.3	2.5	5.5	1.4	2.5	3.6
S11	NeutralHumans_arousal	36	male	70	306.5	1	3.25	2	19	20	22	20	5.3	3.7	5.3	1.4	2.4	1.1	1.2	1.3	5.2	3.2	5.1	1.9	2.7	1	1.4	1.2	3.5	2.8	1.7	3.3	2.1	1.9	1.9	2.2	3.6	2.3	1.9	3.3	2.2	1.9	2.7	2.3	2.5	5.5	1.4	2.5	3.6
S11	NeutralHumans_happiness	36	male	70	306.5	1	3.25	2	19	20	22	20	5.3	3.7	5.3	1.4	2.4	1.1	1.2	1.3	5.2	3.2	5.1	1.9	2.7	1	1.4	1.2	3.5	2.8	1.7	3.3	2.1	1.9	1.9	2.2	3.6	2.3	1.9	3.3	2.2	1.9	2.7	2.3	2.5	5.5	1.4	2.5	3.6
S11	NeutralHumans_disgust	36	male	70	306.5	1	3.25	2	19	20	22	20	5.3	3.7	5.3	1.4	2.4	1.1	1.2	1.3	5.2	3.2	5.1	1.9	2.7	1	1.4	1.2	3.5	2.8	1.7	3.3	2.1	1.9	1.9	2.2	3.6	2.3	1.9	3.3	2.2	1.9	2.7	2.3	2.5	5.5	1.4	2.5	3.6
S11	NeutralHumans_fear	36	male	70	306.5	1	3.25	2	19	20	22	20	5.3	3.7	5.3	1.4	2.4	1.1	1.2	1.3	5.2	3.2	5.1	1.9	2.7	1	1.4	1.2	3.5	2.8	1.7	3.3	2.1	1.9	1.9	2.2	3.6	2.3	1.9	3.3	2.2	1.9	2.7	2.3	2.5	5.5	1.4	2.5	3.6
S11	NeutralHumans_sadness	36	male	70	306.5	1	3.25	2	19	20	22	20	5.3	3.7	5.3	1.4	2.4	1.1	1.2	1.3	5.2	3.2	5.1	1.9	2.7	1	1.4	1.2	3.5	2.8	1.7	3.3	2.1	1.9	1.9	2.2	3.6	2.3	1.9	3.3	2.2	1.9	2.7	2.3	2.5	5.5	1.4	2.5	3.6
S11	NeutralHumans_valence	36	male	70	306.5	1	3.25	2	19	20	22	20	5.3	3.7	5.3	1.4	2.4	1.1	1.2	1.3	5.2	3.2	5.1	1.9	2.7	1	1.4	1.2	3.5	2.8	1.7	3.3	2.1	1.9	1.9	2.2	3.6	2.3	1.9	3.3	2.2	1.9	2.7	2.3	2.5	5.5	1.4	2.5	3.6
S11	NeutralHumans_anger	36	male	70	306.5	1	3.25	2	19	20	22	20	5.3	3.7	5.3	1.4	2.4	1.1	1.2	1.3	5.2	3.2	5.1	1.9	2.7	1	1.4	1.2	3.5	2.8	1.7	3.3	2.1	1.9	1.9	2.2	3.6	2.3	1.9	3.3	2.2	1.9	2.7	2.3	2.5	5.5	1.4	2.5	3.6
S11	NeutralHumans_surprise	36	male	70	306.5	1	3.25	2	19	20	22	20	5.3	3.7	5.3	1.4	2.4	1.1	1.2	1.3	5.2	3.2	5.1	1.9	2.7	1	1.4	1.2	3.5	2.8	1.7	3.3	2.1	1.9	1.9	2.2	3.6	2.3	1.9	3.3	2.2	1.9	2.7	2.3	2.5	5.5	1.4	2.5	3.6
S11	Object_arousal	36	male	70	306.5	1	3.25	2	19	20	22	20	5.3	3.7	5.3	1.4	2.4	1.1	1.2	1.3	5.2	3.2	5.1	1.9	2.7	1	1.4	1.2	3.5	2.8	1.7	3.3	2.1	1.9	1.9	2.2	3.6	2.3	1.9	3.3	2.2	1.9	2.7	2.3	2.5	5.5	1.4	2.5	3.6
S11	Object_happiness	36	male	70	306.5	1	3.25	2	19	20	22	20	5.3	3.7	5.3	1.4	2.4	1.1	1.2	1.3	5.2	3.2	5.1	1.9	2.7	1	1.4	1.2	3.5	2.8	1.7	3.3	2.1	1.9	1.9	2.2	3.6	2.3	1.9	3.3	2.2	1.9	2.7	2.3	2.5	5.5	1.4	2.5	3.6
S11	Object_disgust	36	male	70	306.5	1	3.25	2	19	20	22	20	5.3	3.7	5.3	1.4	2.4	1.1	1.2	1.3	5.2	3.2	5.1	1.9	2.7	1	1.4	1.2	3.5	2.8	1.7	3.3	2.1	1.9	1.9	2.2	3.6	2.3	1.9	3.3	2.2	1.9	2.7	2.3	2.5	5.5	1.4	2.5	3.6
S11	Object_fear	36	male	70	306.5	1	3.25	2	19	20	22	20	5.3	3.7	5.3	1.4	2.4	1.1	1.2	1.3	5.2	3.2	5.1	1.9	2.7	1	1.4	1.2	3.5	2.8	1.7	3.3	2.1	1.9	1.9	2.2	3.6	2.3	1.9	3.3	2.2	1.9	2.7	2.3	2.5	5.5	1.4	2.5	3.6
S11	Object_sadness	36	male	70	306.5	1	3.25	2	19	20	22	20	5.3	3.7	5.3	1.4	2.4	1.1	1.2	1.3	5.2	3.2	5.1	1.9	2.7	1	1.4	1.2	3.5	2.8	1.7	3.3	2.1	1.9	1.9	2.2	3.6	2.3	1.9	3.3	2.2	1.9	2.7	2.3	2.5	5.5	1.4	2.5	3.6
S11	Object_valence	36	male	70	306.5	1	3.25	2	19	20	22	20	5.3	3.7	5.3	1.4	2.4	1.1	1.2	1.3	5.2	3.2	5.1	1.9	2.7	1	1.4	1.2	3.5	2.8	1.7	3.3	2.1	1.9	1.9	2.2	3.6	2.3	1.9	3.3	2.2	1.9	2.7	2.3	2.5	5.5	1.4	2.5	3.6
S11	Object_anger	36	male	70	306.5	1	3.25	2	19	20	22	20	5.3	3.7	5.3	1.4	2.4	1.1	1.2	1.3	5.2	3.2	5.1	1.9	2.7	1	1.4	1.2	3.5	2.8	1.7	3.3	2.1	1.9	1.9	2.2	3.6	2.3	1.9	3.3	2.2	1.9	2.7	2.3	2.5	5.5	1.4	2.5	3.6
S11	Object_surprise	36	male	70	306.5	1	3.25	2	19	20	22	20	5.3	3.7	5.3	1.4	2.4	1.1	1.2	1.3	5.2	3.2	5.1	1.9	2.7	1	1.4	1.2	3.5	2.8	1.7	3.3	2.1	1.9	1.9	2.2	3.6	2.3	1.9	3.3	2.2	1.9	2.7	2.3	2.5	5.5	1.4	2.5	3.6
S11	Pixel_arousal	36	male	70	306.5	1	3.25	2	19	20	22	20	5.3	3.7	5.3	1.4	2.4	1.1	1.2	1.3	5.2	3.2	5.1	1.9	2.7	1	1.4	1.2	3.5	2.8	1.7	3.3	2.1	1.9	1.9	2.2	3.6	2.3	1.9	3.3	2.2	1.9	2.7	2.3	2.5	5.5	1.4	2.5	3.6
S11	Pixel_happiness	36	male	70	306.5	1	3.25	2	19	20	22	20	5.3	3.7	5.3	1.4	2.4	1.1	1.2	1.3	5.2	3.2	5.1	1.9	2.7	1	1.4	1.2	3.5	2.8	1.7	3.3	2.1	1.9	1.9	2.2	3.6	2.3	1.9	3.3	2.2	1.9	2.7	2.3	2.5	5.5	1.4	2.5	3.6
S11	Pixel_disgust	36	male	70	306.5	1	3.25	2	19	20	22	20	5.3	3.7	5.3	1.4	2.4	1.1	1.2	1.3	5.2	3.2	5.1	1.9	2.7	1	1.4	1.2	3.5	2.8	1.7	3.3	2.1	1.9	1.9	2.2	3.6	2.3	1.9	3.3	2.2	1.9	2.7	2.3	2.5	5.5	1.4	2.5	3.6
S11	Pixel_fear	36	male	70	306.5	1	3.25	2	19	20	22	20	5.3	3.7	5.3	1.4	2.4	1.1	1.2	1.3	5.2	3.2	5.1	1.9	2.7	1	1.4	1.2	3.5	2.8	1.7	3.3	2.1	1.9	1.9	2.2	3.6	2.3	1.9	3.3	2.2	1.9	2.7	2.3	2.5	5.5	1.4	2.5	3.6
S11	Pixel_sadness	36	male	70	306.5	1	3.25	2	19	20	22	20	5.3	3.7	5.3	1.4	2.4	1.1	1.2	1.3	5.2	3.2	5.1	1.9	2.7	1	1.4	1.2	3.5	2.8	1.7	3.3	2.1	1.9	1.9	2.2	3.6	2.3	1.9	3.3	2.2	1.9	2.7	2.3	2.5	5.5	1.4	2.5	3.6
S11	Pixel_valence	36	male	70	306.5	1	3.25	2	19	20	22	20	5.3	3.7	5.3	1.4	2.4	1.1	1.2	1.3	5.2	3.2	5.1	1.9	2.7	1	1.4	1.2	3.5	2.8	1.7	3.3	2.1	1.9	1.9	2.2	3.6	2.3	1.9	3.3	2.2	1.9	2.7	2.3	2.5	5.5	1.4	2.5	3.6
S11	Pixel_anger	36	male	70	306.5	1	3.25	2	19	20	22	20	5.3	3.7	5.3	1.4	2.4	1.1	1.2	1.3	5.2	3.2	5.1	1.9	2.7	1	1.4	1.2	3.5	2.8	1.7	3.3	2.1	1.9	1.9	2.2	3.6	2.3	1.9	3.3	2.2	1.9	2.7	2.3	2.5	5.5	1.4	2.5	3.6
S11	Pixel_surprise	36	male	70	306.5	1	3.25	2	19	20	22	20	5.3	3.7	5.3	1.4	2.4	1.1	1.2	1.3	5.2	3.2	5.1	1.9	2.7	1	1.4	1.2	3.5	2.8	1.7	3.3	2.1	1.9	1.9	2.2	3.6	2.3	1.9	3.3	2.2	1.9	2.7	2.3	2.5	5.5	1.4	2.5	3.6
S12	ThreateningDogs_arousal	32	female	100	211.5	0	4.25	2.13	21	24	18	19	6	4.4	5.7	1	3.8	1	1	1	5.6	4.3	4.9	1.5	3.4	1	1	1	3.6	3	1.6	2.9	2.2	1.6	1.2	1.4	4.2	3.4	2.7	2.4	2.4	1.3	1.1	1	2	5.3	1.4	2.2	5.1
S12	ThreateningDogs_happiness	32	female	100	211.5	0	4.25	2.13	21	24	18	19	6	4.4	5.7	1	3.8	1	1	1	5.6	4.3	4.9	1.5	3.4	1	1	1	3.6	3	1.6	2.9	2.2	1.6	1.2	1.4	4.2	3.4	2.7	2.4	2.4	1.3	1.1	1	2	5.3	1.4	2.2	5.1
S12	ThreateningDogs_disgust	32	female	100	211.5	0	4.25	2.13	21	24	18	19	6	4.4	5.7	1	3.8	1	1	1	5.6	4.3	4.9	1.5	3.4	1	1	1	3.6	3	1.6	2.9	2.2	1.6	1.2	1.4	4.2	3.4	2.7	2.4	2.4	1.3	1.1	1	2	5.3	1.4	2.2	5.1
S12	ThreateningDogs_fear	32	female	100	211.5	0	4.25	2.13	21	24	18	19	6	4.4	5.7	1	3.8	1	1	1	5.6	4.3	4.9	1.5	3.4	1	1	1	3.6	3	1.6	2.9	2.2	1.6	1.2	1.4	4.2	3.4	2.7	2.4	2.4	1.3	1.1	1	2	5.3	1.4	2.2	5.1
S12	ThreateningDogs_sadness	32	female	100	211.5	0	4.25	2.13	21	24	18	19	6	4.4	5.7	1	3.8	1	1	1	5.6	4.3	4.9	1.5	3.4	1	1	1	3.6	3	1.6	2.9	2.2	1.6	1.2	1.4	4.2	3.4	2.7	2.4	2.4	1.3	1.1	1	2	5.3	1.4	2.2	5.1
S12	ThreateningDogs_valence	32	female	100	211.5	0	4.25	2.13	21	24	18	19	6	4.4	5.7	1	3.8	1	1	1	5.6	4.3	4.9	1.5	3.4	1	1	1	3.6	3	1.6	2.9	2.2	1.6	1.2	1.4	4.2	3.4	2.7	2.4	2.4	1.3	1.1	1	2	5.3	1.4	2.2	5.1
S12	ThreateningDogs_anger	32	female	100	211.5	0	4.25	2.13	21	24	18	19	6	4.4	5.7	1	3.8	1	1	1	5.6	4.3	4.9	1.5	3.4	1	1	1	3.6	3	1.6	2.9	2.2	1.6	1.2	1.4	4.2	3.4	2.7	2.4	2.4	1.3	1.1	1	2	5.3	1.4	2.2	5.1
S12	ThreateningDogs_surprise	32	female	100	211.5	0	4.25	2.13	21	24	18	19	6	4.4	5.7	1	3.8	1	1	1	5.6	4.3	4.9	1.5	3.4	1	1	1	3.6	3	1.6	2.9	2.2	1.6	1.2	1.4	4.2	3.4	2.7	2.4	2.4	1.3	1.1	1	2	5.3	1.4	2.2	5.1
S12	ThreateningHumans_arousal	32	female	100	211.5	0	4.25	2.13	21	24	18	19	6	4.4	5.7	1	3.8	1	1	1	5.6	4.3	4.9	1.5	3.4	1	1	1	3.6	3	1.6	2.9	2.2	1.6	1.2	1.4	4.2	3.4	2.7	2.4	2.4	1.3	1.1	1	2	5.3	1.4	2.2	5.1
S12	ThreateningHumans_happiness	32	female	100	211.5	0	4.25	2.13	21	24	18	19	6	4.4	5.7	1	3.8	1	1	1	5.6	4.3	4.9	1.5	3.4	1	1	1	3.6	3	1.6	2.9	2.2	1.6	1.2	1.4	4.2	3.4	2.7	2.4	2.4	1.3	1.1	1	2	5.3	1.4	2.2	5.1
S12	ThreateningHumans_disgust	32	female	100	211.5	0	4.25	2.13	21	24	18	19	6	4.4	5.7	1	3.8	1	1	1	5.6	4.3	4.9	1.5	3.4	1	1	1	3.6	3	1.6	2.9	2.2	1.6	1.2	1.4	4.2	3.4	2.7	2.4	2.4	1.3	1.1	1	2	5.3	1.4	2.2	5.1
S12	ThreateningHumans_fear	32	female	100	211.5	0	4.25	2.13	21	24	18	19	6	4.4	5.7	1	3.8	1	1	1	5.6	4.3	4.9	1.5	3.4	1	1	1	3.6	3	1.6	2.9	2.2	1.6	1.2	1.4	4.2	3.4	2.7	2.4	2.4	1.3	1.1	1	2	5.3	1.4	2.2	5.1
S12	ThreateningHumans_sadness	32	female	100	211.5	0	4.25	2.13	21	24	18	19	6	4.4	5.7	1	3.8	1	1	1	5.6	4.3	4.9	1.5	3.4	1	1	1	3.6	3	1.6	2.9	2.2	1.6	1.2	1.4	4.2	3.4	2.7	2.4	2.4	1.3	1.1	1	2	5.3	1.4	2.2	5.1
S12	ThreateningHumans_valence	32	female	100	211.5	0	4.25	2.13	21	24	18	19	6	4.4	5.7	1	3.8	1	1	1	5.6	4.3	4.9	1.5	3.4	1	1	1	3.6	3	1.6	2.9	2.2	1.6	1.2	1.4	4.2	3.4	2.7	2.4	2.4	1.3	1.1	1	2	5.3	1.4	2.2	5.1
S12	ThreateningHumans_anger	32	female	100	211.5	0	4.25	2.13	21	24	18	19	6	4.4	5.7	1	3.8	1	1	1	5.6	4.3	4.9	1.5	3.4	1	1	1	3.6	3	1.6	2.9	2.2	1.6	1.2	1.4	4.2	3.4	2.7	2.4	2.4	1.3	1.1	1	2	5.3	1.4	2.2	5.1
S12	ThreateningHumans_surprise	32	female	100	211.5	0	4.25	2.13	21	24	18	19	6	4.4	5.7	1	3.8	1	1	1	5.6	4.3	4.9	1.5	3.4	1	1	1	3.6	3	1.6	2.9	2.2	1.6	1.2	1.4	4.2	3.4	2.7	2.4	2.4	1.3	1.1	1	2	5.3	1.4	2.2	5.1
S12	PleasantDogs_arousal	32	female	100	211.5	0	4.25	2.13	21	24	18	19	6	4.4	5.7	1	3.8	1	1	1	5.6	4.3	4.9	1.5	3.4	1	1	1	3.6	3	1.6	2.9	2.2	1.6	1.2	1.4	4.2	3.4	2.7	2.4	2.4	1.3	1.1	1	2	5.3	1.4	2.2	5.1
S12	PleasantDogs_happiness	32	female	100	211.5	0	4.25	2.13	21	24	18	19	6	4.4	5.7	1	3.8	1	1	1	5.6	4.3	4.9	1.5	3.4	1	1	1	3.6	3	1.6	2.9	2.2	1.6	1.2	1.4	4.2	3.4	2.7	2.4	2.4	1.3	1.1	1	2	5.3	1.4	2.2	5.1
S12	PleasantDogs_disgust	32	female	100	211.5	0	4.25	2.13	21	24	18	19	6	4.4	5.7	1	3.8	1	1	1	5.6	4.3	4.9	1.5	3.4	1	1	1	3.6	3	1.6	2.9	2.2	1.6	1.2	1.4	4.2	3.4	2.7	2.4	2.4	1.3	1.1	1	2	5.3	1.4	2.2	5.1
S12	PleasantDogs_fear	32	female	100	211.5	0	4.25	2.13	21	24	18	19	6	4.4	5.7	1	3.8	1	1	1	5.6	4.3	4.9	1.5	3.4	1	1	1	3.6	3	1.6	2.9	2.2	1.6	1.2	1.4	4.2	3.4	2.7	2.4	2.4	1.3	1.1	1	2	5.3	1.4	2.2	5.1
S12	PleasantDogs_sadness	32	female	100	211.5	0	4.25	2.13	21	24	18	19	6	4.4	5.7	1	3.8	1	1	1	5.6	4.3	4.9	1.5	3.4	1	1	1	3.6	3	1.6	2.9	2.2	1.6	1.2	1.4	4.2	3.4	2.7	2.4	2.4	1.3	1.1	1	2	5.3	1.4	2.2	5.1
S12	PleasantDogs_valence	32	female	100	211.5	0	4.25	2.13	21	24	18	19	6	4.4	5.7	1	3.8	1	1	1	5.6	4.3	4.9	1.5	3.4	1	1	1	3.6	3	1.6	2.9	2.2	1.6	1.2	1.4	4.2	3.4	2.7	2.4	2.4	1.3	1.1	1	2	5.3	1.4	2.2	5.1
S12	PleasantDogs_anger	32	female	100	211.5	0	4.25	2.13	21	24	18	19	6	4.4	5.7	1	3.8	1	1	1	5.6	4.3	4.9	1.5	3.4	1	1	1	3.6	3	1.6	2.9	2.2	1.6	1.2	1.4	4.2	3.4	2.7	2.4	2.4	1.3	1.1	1	2	5.3	1.4	2.2	5.1
S12	PleasantDogs_surprise	32	female	100	211.5	0	4.25	2.13	21	24	18	19	6	4.4	5.7	1	3.8	1	1	1	5.6	4.3	4.9	1.5	3.4	1	1	1	3.6	3	1.6	2.9	2.2	1.6	1.2	1.4	4.2	3.4	2.7	2.4	2.4	1.3	1.1	1	2	5.3	1.4	2.2	5.1
S12	PleasantHumans_arousal	32	female	100	211.5	0	4.25	2.13	21	24	18	19	6	4.4	5.7	1	3.8	1	1	1	5.6	4.3	4.9	1.5	3.4	1	1	1	3.6	3	1.6	2.9	2.2	1.6	1.2	1.4	4.2	3.4	2.7	2.4	2.4	1.3	1.1	1	2	5.3	1.4	2.2	5.1
S12	PleasantHumans_happiness	32	female	100	211.5	0	4.25	2.13	21	24	18	19	6	4.4	5.7	1	3.8	1	1	1	5.6	4.3	4.9	1.5	3.4	1	1	1	3.6	3	1.6	2.9	2.2	1.6	1.2	1.4	4.2	3.4	2.7	2.4	2.4	1.3	1.1	1	2	5.3	1.4	2.2	5.1
S12	PleasantHumans_disgust	32	female	100	211.5	0	4.25	2.13	21	24	18	19	6	4.4	5.7	1	3.8	1	1	1	5.6	4.3	4.9	1.5	3.4	1	1	1	3.6	3	1.6	2.9	2.2	1.6	1.2	1.4	4.2	3.4	2.7	2.4	2.4	1.3	1.1	1	2	5.3	1.4	2.2	5.1
S12	PleasantHumans_fear	32	female	100	211.5	0	4.25	2.13	21	24	18	19	6	4.4	5.7	1	3.8	1	1	1	5.6	4.3	4.9	1.5	3.4	1	1	1	3.6	3	1.6	2.9	2.2	1.6	1.2	1.4	4.2	3.4	2.7	2.4	2.4	1.3	1.1	1	2	5.3	1.4	2.2	5.1
S12	PleasantHumans_sadness	32	female	100	211.5	0	4.25	2.13	21	24	18	19	6	4.4	5.7	1	3.8	1	1	1	5.6	4.3	4.9	1.5	3.4	1	1	1	3.6	3	1.6	2.9	2.2	1.6	1.2	1.4	4.2	3.4	2.7	2.4	2.4	1.3	1.1	1	2	5.3	1.4	2.2	5.1
S12	PleasantHumans_valence	32	female	100	211.5	0	4.25	2.13	21	24	18	19	6	4.4	5.7	1	3.8	1	1	1	5.6	4.3	4.9	1.5	3.4	1	1	1	3.6	3	1.6	2.9	2.2	1.6	1.2	1.4	4.2	3.4	2.7	2.4	2.4	1.3	1.1	1	2	5.3	1.4	2.2	5.1
S12	PleasantHumans_anger	32	female	100	211.5	0	4.25	2.13	21	24	18	19	6	4.4	5.7	1	3.8	1	1	1	5.6	4.3	4.9	1.5	3.4	1	1	1	3.6	3	1.6	2.9	2.2	1.6	1.2	1.4	4.2	3.4	2.7	2.4	2.4	1.3	1.1	1	2	5.3	1.4	2.2	5.1
S12	PleasantHumans_surprise	32	female	100	211.5	0	4.25	2.13	21	24	18	19	6	4.4	5.7	1	3.8	1	1	1	5.6	4.3	4.9	1.5	3.4	1	1	1	3.6	3	1.6	2.9	2.2	1.6	1.2	1.4	4.2	3.4	2.7	2.4	2.4	1.3	1.1	1	2	5.3	1.4	2.2	5.1
S12	NeutralDogs_arousal	32	female	100	211.5	0	4.25	2.13	21	24	18	19	6	4.4	5.7	1	3.8	1	1	1	5.6	4.3	4.9	1.5	3.4	1	1	1	3.6	3	1.6	2.9	2.2	1.6	1.2	1.4	4.2	3.4	2.7	2.4	2.4	1.3	1.1	1	2	5.3	1.4	2.2	5.1
S12	NeutralDogs_happiness	32	female	100	211.5	0	4.25	2.13	21	24	18	19	6	4.4	5.7	1	3.8	1	1	1	5.6	4.3	4.9	1.5	3.4	1	1	1	3.6	3	1.6	2.9	2.2	1.6	1.2	1.4	4.2	3.4	2.7	2.4	2.4	1.3	1.1	1	2	5.3	1.4	2.2	5.1
S12	NeutralDogs_disgust	32	female	100	211.5	0	4.25	2.13	21	24	18	19	6	4.4	5.7	1	3.8	1	1	1	5.6	4.3	4.9	1.5	3.4	1	1	1	3.6	3	1.6	2.9	2.2	1.6	1.2	1.4	4.2	3.4	2.7	2.4	2.4	1.3	1.1	1	2	5.3	1.4	2.2	5.1
S12	NeutralDogs_fear	32	female	100	211.5	0	4.25	2.13	21	24	18	19	6	4.4	5.7	1	3.8	1	1	1	5.6	4.3	4.9	1.5	3.4	1	1	1	3.6	3	1.6	2.9	2.2	1.6	1.2	1.4	4.2	3.4	2.7	2.4	2.4	1.3	1.1	1	2	5.3	1.4	2.2	5.1
S12	NeutralDogs_sadness	32	female	100	211.5	0	4.25	2.13	21	24	18	19	6	4.4	5.7	1	3.8	1	1	1	5.6	4.3	4.9	1.5	3.4	1	1	1	3.6	3	1.6	2.9	2.2	1.6	1.2	1.4	4.2	3.4	2.7	2.4	2.4	1.3	1.1	1	2	5.3	1.4	2.2	5.1
S12	NeutralDogs_valence	32	female	100	211.5	0	4.25	2.13	21	24	18	19	6	4.4	5.7	1	3.8	1	1	1	5.6	4.3	4.9	1.5	3.4	1	1	1	3.6	3	1.6	2.9	2.2	1.6	1.2	1.4	4.2	3.4	2.7	2.4	2.4	1.3	1.1	1	2	5.3	1.4	2.2	5.1
S12	NeutralDogs_anger	32	female	100	211.5	0	4.25	2.13	21	24	18	19	6	4.4	5.7	1	3.8	1	1	1	5.6	4.3	4.9	1.5	3.4	1	1	1	3.6	3	1.6	2.9	2.2	1.6	1.2	1.4	4.2	3.4	2.7	2.4	2.4	1.3	1.1	1	2	5.3	1.4	2.2	5.1
S12	NeutralDogs_surprise	32	female	100	211.5	0	4.25	2.13	21	24	18	19	6	4.4	5.7	1	3.8	1	1	1	5.6	4.3	4.9	1.5	3.4	1	1	1	3.6	3	1.6	2.9	2.2	1.6	1.2	1.4	4.2	3.4	2.7	2.4	2.4	1.3	1.1	1	2	5.3	1.4	2.2	5.1
S12	NeutralHumans_arousal	32	female	100	211.5	0	4.25	2.13	21	24	18	19	6	4.4	5.7	1	3.8	1	1	1	5.6	4.3	4.9	1.5	3.4	1	1	1	3.6	3	1.6	2.9	2.2	1.6	1.2	1.4	4.2	3.4	2.7	2.4	2.4	1.3	1.1	1	2	5.3	1.4	2.2	5.1
S12	NeutralHumans_happiness	32	female	100	211.5	0	4.25	2.13	21	24	18	19	6	4.4	5.7	1	3.8	1	1	1	5.6	4.3	4.9	1.5	3.4	1	1	1	3.6	3	1.6	2.9	2.2	1.6	1.2	1.4	4.2	3.4	2.7	2.4	2.4	1.3	1.1	1	2	5.3	1.4	2.2	5.1
S12	NeutralHumans_disgust	32	female	100	211.5	0	4.25	2.13	21	24	18	19	6	4.4	5.7	1	3.8	1	1	1	5.6	4.3	4.9	1.5	3.4	1	1	1	3.6	3	1.6	2.9	2.2	1.6	1.2	1.4	4.2	3.4	2.7	2.4	2.4	1.3	1.1	1	2	5.3	1.4	2.2	5.1
S12	NeutralHumans_fear	32	female	100	211.5	0	4.25	2.13	21	24	18	19	6	4.4	5.7	1	3.8	1	1	1	5.6	4.3	4.9	1.5	3.4	1	1	1	3.6	3	1.6	2.9	2.2	1.6	1.2	1.4	4.2	3.4	2.7	2.4	2.4	1.3	1.1	1	2	5.3	1.4	2.2	5.1
S12	NeutralHumans_sadness	32	female	100	211.5	0	4.25	2.13	21	24	18	19	6	4.4	5.7	1	3.8	1	1	1	5.6	4.3	4.9	1.5	3.4	1	1	1	3.6	3	1.6	2.9	2.2	1.6	1.2	1.4	4.2	3.4	2.7	2.4	2.4	1.3	1.1	1	2	5.3	1.4	2.2	5.1
S12	NeutralHumans_valence	32	female	100	211.5	0	4.25	2.13	21	24	18	19	6	4.4	5.7	1	3.8	1	1	1	5.6	4.3	4.9	1.5	3.4	1	1	1	3.6	3	1.6	2.9	2.2	1.6	1.2	1.4	4.2	3.4	2.7	2.4	2.4	1.3	1.1	1	2	5.3	1.4	2.2	5.1
S12	NeutralHumans_anger	32	female	100	211.5	0	4.25	2.13	21	24	18	19	6	4.4	5.7	1	3.8	1	1	1	5.6	4.3	4.9	1.5	3.4	1	1	1	3.6	3	1.6	2.9	2.2	1.6	1.2	1.4	4.2	3.4	2.7	2.4	2.4	1.3	1.1	1	2	5.3	1.4	2.2	5.1
S12	NeutralHumans_surprise	32	female	100	211.5	0	4.25	2.13	21	24	18	19	6	4.4	5.7	1	3.8	1	1	1	5.6	4.3	4.9	1.5	3.4	1	1	1	3.6	3	1.6	2.9	2.2	1.6	1.2	1.4	4.2	3.4	2.7	2.4	2.4	1.3	1.1	1	2	5.3	1.4	2.2	5.1
S12	Object_arousal	32	female	100	211.5	0	4.25	2.13	21	24	18	19	6	4.4	5.7	1	3.8	1	1	1	5.6	4.3	4.9	1.5	3.4	1	1	1	3.6	3	1.6	2.9	2.2	1.6	1.2	1.4	4.2	3.4	2.7	2.4	2.4	1.3	1.1	1	2	5.3	1.4	2.2	5.1
S12	Object_happiness	32	female	100	211.5	0	4.25	2.13	21	24	18	19	6	4.4	5.7	1	3.8	1	1	1	5.6	4.3	4.9	1.5	3.4	1	1	1	3.6	3	1.6	2.9	2.2	1.6	1.2	1.4	4.2	3.4	2.7	2.4	2.4	1.3	1.1	1	2	5.3	1.4	2.2	5.1
S12	Object_disgust	32	female	100	211.5	0	4.25	2.13	21	24	18	19	6	4.4	5.7	1	3.8	1	1	1	5.6	4.3	4.9	1.5	3.4	1	1	1	3.6	3	1.6	2.9	2.2	1.6	1.2	1.4	4.2	3.4	2.7	2.4	2.4	1.3	1.1	1	2	5.3	1.4	2.2	5.1
S12	Object_fear	32	female	100	211.5	0	4.25	2.13	21	24	18	19	6	4.4	5.7	1	3.8	1	1	1	5.6	4.3	4.9	1.5	3.4	1	1	1	3.6	3	1.6	2.9	2.2	1.6	1.2	1.4	4.2	3.4	2.7	2.4	2.4	1.3	1.1	1	2	5.3	1.4	2.2	5.1
S12	Object_sadness	32	female	100	211.5	0	4.25	2.13	21	24	18	19	6	4.4	5.7	1	3.8	1	1	1	5.6	4.3	4.9	1.5	3.4	1	1	1	3.6	3	1.6	2.9	2.2	1.6	1.2	1.4	4.2	3.4	2.7	2.4	2.4	1.3	1.1	1	2	5.3	1.4	2.2	5.1
S12	Object_valence	32	female	100	211.5	0	4.25	2.13	21	24	18	19	6	4.4	5.7	1	3.8	1	1	1	5.6	4.3	4.9	1.5	3.4	1	1	1	3.6	3	1.6	2.9	2.2	1.6	1.2	1.4	4.2	3.4	2.7	2.4	2.4	1.3	1.1	1	2	5.3	1.4	2.2	5.1
S12	Object_anger	32	female	100	211.5	0	4.25	2.13	21	24	18	19	6	4.4	5.7	1	3.8	1	1	1	5.6	4.3	4.9	1.5	3.4	1	1	1	3.6	3	1.6	2.9	2.2	1.6	1.2	1.4	4.2	3.4	2.7	2.4	2.4	1.3	1.1	1	2	5.3	1.4	2.2	5.1
S12	Object_surprise	32	female	100	211.5	0	4.25	2.13	21	24	18	19	6	4.4	5.7	1	3.8	1	1	1	5.6	4.3	4.9	1.5	3.4	1	1	1	3.6	3	1.6	2.9	2.2	1.6	1.2	1.4	4.2	3.4	2.7	2.4	2.4	1.3	1.1	1	2	5.3	1.4	2.2	5.1
S12	Pixel_arousal	32	female	100	211.5	0	4.25	2.13	21	24	18	19	6	4.4	5.7	1	3.8	1	1	1	5.6	4.3	4.9	1.5	3.4	1	1	1	3.6	3	1.6	2.9	2.2	1.6	1.2	1.4	4.2	3.4	2.7	2.4	2.4	1.3	1.1	1	2	5.3	1.4	2.2	5.1
S12	Pixel_happiness	32	female	100	211.5	0	4.25	2.13	21	24	18	19	6	4.4	5.7	1	3.8	1	1	1	5.6	4.3	4.9	1.5	3.4	1	1	1	3.6	3	1.6	2.9	2.2	1.6	1.2	1.4	4.2	3.4	2.7	2.4	2.4	1.3	1.1	1	2	5.3	1.4	2.2	5.1
S12	Pixel_disgust	32	female	100	211.5	0	4.25	2.13	21	24	18	19	6	4.4	5.7	1	3.8	1	1	1	5.6	4.3	4.9	1.5	3.4	1	1	1	3.6	3	1.6	2.9	2.2	1.6	1.2	1.4	4.2	3.4	2.7	2.4	2.4	1.3	1.1	1	2	5.3	1.4	2.2	5.1
S12	Pixel_fear	32	female	100	211.5	0	4.25	2.13	21	24	18	19	6	4.4	5.7	1	3.8	1	1	1	5.6	4.3	4.9	1.5	3.4	1	1	1	3.6	3	1.6	2.9	2.2	1.6	1.2	1.4	4.2	3.4	2.7	2.4	2.4	1.3	1.1	1	2	5.3	1.4	2.2	5.1
S12	Pixel_sadness	32	female	100	211.5	0	4.25	2.13	21	24	18	19	6	4.4	5.7	1	3.8	1	1	1	5.6	4.3	4.9	1.5	3.4	1	1	1	3.6	3	1.6	2.9	2.2	1.6	1.2	1.4	4.2	3.4	2.7	2.4	2.4	1.3	1.1	1	2	5.3	1.4	2.2	5.1
S12	Pixel_valence	32	female	100	211.5	0	4.25	2.13	21	24	18	19	6	4.4	5.7	1	3.8	1	1	1	5.6	4.3	4.9	1.5	3.4	1	1	1	3.6	3	1.6	2.9	2.2	1.6	1.2	1.4	4.2	3.4	2.7	2.4	2.4	1.3	1.1	1	2	5.3	1.4	2.2	5.1
S12	Pixel_anger	32	female	100	211.5	0	4.25	2.13	21	24	18	19	6	4.4	5.7	1	3.8	1	1	1	5.6	4.3	4.9	1.5	3.4	1	1	1	3.6	3	1.6	2.9	2.2	1.6	1.2	1.4	4.2	3.4	2.7	2.4	2.4	1.3	1.1	1	2	5.3	1.4	2.2	5.1
S12	Pixel_surprise	32	female	100	211.5	0	4.25	2.13	21	24	18	19	6	4.4	5.7	1	3.8	1	1	1	5.6	4.3	4.9	1.5	3.4	1	1	1	3.6	3	1.6	2.9	2.2	1.6	1.2	1.4	4.2	3.4	2.7	2.4	2.4	1.3	1.1	1	2	5.3	1.4	2.2	5.1
S13	ThreateningDogs_arousal	33	female	100	288.5	0	2.5	3.13	22	23	23	20	5.4	3.6	5.2	1.2	1.6	1.1	1	1	5.3	3.5	5.2	1.2	2.7	1.1	1.1	1	3.6	1.7	2.2	2.7	1.4	1.5	1.9	1.8	3.8	2.3	2.7	3.1	2.2	1.5	2.1	1.5	2.4	5.2	1.7	2.2	3.1
S13	ThreateningDogs_happiness	33	female	100	288.5	0	2.5	3.13	22	23	23	20	5.4	3.6	5.2	1.2	1.6	1.1	1	1	5.3	3.5	5.2	1.2	2.7	1.1	1.1	1	3.6	1.7	2.2	2.7	1.4	1.5	1.9	1.8	3.8	2.3	2.7	3.1	2.2	1.5	2.1	1.5	2.4	5.2	1.7	2.2	3.1
S13	ThreateningDogs_disgust	33	female	100	288.5	0	2.5	3.13	22	23	23	20	5.4	3.6	5.2	1.2	1.6	1.1	1	1	5.3	3.5	5.2	1.2	2.7	1.1	1.1	1	3.6	1.7	2.2	2.7	1.4	1.5	1.9	1.8	3.8	2.3	2.7	3.1	2.2	1.5	2.1	1.5	2.4	5.2	1.7	2.2	3.1
S13	ThreateningDogs_fear	33	female	100	288.5	0	2.5	3.13	22	23	23	20	5.4	3.6	5.2	1.2	1.6	1.1	1	1	5.3	3.5	5.2	1.2	2.7	1.1	1.1	1	3.6	1.7	2.2	2.7	1.4	1.5	1.9	1.8	3.8	2.3	2.7	3.1	2.2	1.5	2.1	1.5	2.4	5.2	1.7	2.2	3.1
S13	ThreateningDogs_sadness	33	female	100	288.5	0	2.5	3.13	22	23	23	20	5.4	3.6	5.2	1.2	1.6	1.1	1	1	5.3	3.5	5.2	1.2	2.7	1.1	1.1	1	3.6	1.7	2.2	2.7	1.4	1.5	1.9	1.8	3.8	2.3	2.7	3.1	2.2	1.5	2.1	1.5	2.4	5.2	1.7	2.2	3.1
S13	ThreateningDogs_valence	33	female	100	288.5	0	2.5	3.13	22	23	23	20	5.4	3.6	5.2	1.2	1.6	1.1	1	1	5.3	3.5	5.2	1.2	2.7	1.1	1.1	1	3.6	1.7	2.2	2.7	1.4	1.5	1.9	1.8	3.8	2.3	2.7	3.1	2.2	1.5	2.1	1.5	2.4	5.2	1.7	2.2	3.1
S13	ThreateningDogs_anger	33	female	100	288.5	0	2.5	3.13	22	23	23	20	5.4	3.6	5.2	1.2	1.6	1.1	1	1	5.3	3.5	5.2	1.2	2.7	1.1	1.1	1	3.6	1.7	2.2	2.7	1.4	1.5	1.9	1.8	3.8	2.3	2.7	3.1	2.2	1.5	2.1	1.5	2.4	5.2	1.7	2.2	3.1
S13	ThreateningDogs_surprise	33	female	100	288.5	0	2.5	3.13	22	23	23	20	5.4	3.6	5.2	1.2	1.6	1.1	1	1	5.3	3.5	5.2	1.2	2.7	1.1	1.1	1	3.6	1.7	2.2	2.7	1.4	1.5	1.9	1.8	3.8	2.3	2.7	3.1	2.2	1.5	2.1	1.5	2.4	5.2	1.7	2.2	3.1
S13	ThreateningHumans_arousal	33	female	100	288.5	0	2.5	3.13	22	23	23	20	5.4	3.6	5.2	1.2	1.6	1.1	1	1	5.3	3.5	5.2	1.2	2.7	1.1	1.1	1	3.6	1.7	2.2	2.7	1.4	1.5	1.9	1.8	3.8	2.3	2.7	3.1	2.2	1.5	2.1	1.5	2.4	5.2	1.7	2.2	3.1
S13	ThreateningHumans_happiness	33	female	100	288.5	0	2.5	3.13	22	23	23	20	5.4	3.6	5.2	1.2	1.6	1.1	1	1	5.3	3.5	5.2	1.2	2.7	1.1	1.1	1	3.6	1.7	2.2	2.7	1.4	1.5	1.9	1.8	3.8	2.3	2.7	3.1	2.2	1.5	2.1	1.5	2.4	5.2	1.7	2.2	3.1
S13	ThreateningHumans_disgust	33	female	100	288.5	0	2.5	3.13	22	23	23	20	5.4	3.6	5.2	1.2	1.6	1.1	1	1	5.3	3.5	5.2	1.2	2.7	1.1	1.1	1	3.6	1.7	2.2	2.7	1.4	1.5	1.9	1.8	3.8	2.3	2.7	3.1	2.2	1.5	2.1	1.5	2.4	5.2	1.7	2.2	3.1
S13	ThreateningHumans_fear	33	female	100	288.5	0	2.5	3.13	22	23	23	20	5.4	3.6	5.2	1.2	1.6	1.1	1	1	5.3	3.5	5.2	1.2	2.7	1.1	1.1	1	3.6	1.7	2.2	2.7	1.4	1.5	1.9	1.8	3.8	2.3	2.7	3.1	2.2	1.5	2.1	1.5	2.4	5.2	1.7	2.2	3.1
S13	ThreateningHumans_sadness	33	female	100	288.5	0	2.5	3.13	22	23	23	20	5.4	3.6	5.2	1.2	1.6	1.1	1	1	5.3	3.5	5.2	1.2	2.7	1.1	1.1	1	3.6	1.7	2.2	2.7	1.4	1.5	1.9	1.8	3.8	2.3	2.7	3.1	2.2	1.5	2.1	1.5	2.4	5.2	1.7	2.2	3.1
S13	ThreateningHumans_valence	33	female	100	288.5	0	2.5	3.13	22	23	23	20	5.4	3.6	5.2	1.2	1.6	1.1	1	1	5.3	3.5	5.2	1.2	2.7	1.1	1.1	1	3.6	1.7	2.2	2.7	1.4	1.5	1.9	1.8	3.8	2.3	2.7	3.1	2.2	1.5	2.1	1.5	2.4	5.2	1.7	2.2	3.1
S13	ThreateningHumans_anger	33	female	100	288.5	0	2.5	3.13	22	23	23	20	5.4	3.6	5.2	1.2	1.6	1.1	1	1	5.3	3.5	5.2	1.2	2.7	1.1	1.1	1	3.6	1.7	2.2	2.7	1.4	1.5	1.9	1.8	3.8	2.3	2.7	3.1	2.2	1.5	2.1	1.5	2.4	5.2	1.7	2.2	3.1
S13	ThreateningHumans_surprise	33	female	100	288.5	0	2.5	3.13	22	23	23	20	5.4	3.6	5.2	1.2	1.6	1.1	1	1	5.3	3.5	5.2	1.2	2.7	1.1	1.1	1	3.6	1.7	2.2	2.7	1.4	1.5	1.9	1.8	3.8	2.3	2.7	3.1	2.2	1.5	2.1	1.5	2.4	5.2	1.7	2.2	3.1
S13	PleasantDogs_arousal	33	female	100	288.5	0	2.5	3.13	22	23	23	20	5.4	3.6	5.2	1.2	1.6	1.1	1	1	5.3	3.5	5.2	1.2	2.7	1.1	1.1	1	3.6	1.7	2.2	2.7	1.4	1.5	1.9	1.8	3.8	2.3	2.7	3.1	2.2	1.5	2.1	1.5	2.4	5.2	1.7	2.2	3.1
S13	PleasantDogs_happiness	33	female	100	288.5	0	2.5	3.13	22	23	23	20	5.4	3.6	5.2	1.2	1.6	1.1	1	1	5.3	3.5	5.2	1.2	2.7	1.1	1.1	1	3.6	1.7	2.2	2.7	1.4	1.5	1.9	1.8	3.8	2.3	2.7	3.1	2.2	1.5	2.1	1.5	2.4	5.2	1.7	2.2	3.1
S13	PleasantDogs_disgust	33	female	100	288.5	0	2.5	3.13	22	23	23	20	5.4	3.6	5.2	1.2	1.6	1.1	1	1	5.3	3.5	5.2	1.2	2.7	1.1	1.1	1	3.6	1.7	2.2	2.7	1.4	1.5	1.9	1.8	3.8	2.3	2.7	3.1	2.2	1.5	2.1	1.5	2.4	5.2	1.7	2.2	3.1
S13	PleasantDogs_fear	33	female	100	288.5	0	2.5	3.13	22	23	23	20	5.4	3.6	5.2	1.2	1.6	1.1	1	1	5.3	3.5	5.2	1.2	2.7	1.1	1.1	1	3.6	1.7	2.2	2.7	1.4	1.5	1.9	1.8	3.8	2.3	2.7	3.1	2.2	1.5	2.1	1.5	2.4	5.2	1.7	2.2	3.1
S13	PleasantDogs_sadness	33	female	100	288.5	0	2.5	3.13	22	23	23	20	5.4	3.6	5.2	1.2	1.6	1.1	1	1	5.3	3.5	5.2	1.2	2.7	1.1	1.1	1	3.6	1.7	2.2	2.7	1.4	1.5	1.9	1.8	3.8	2.3	2.7	3.1	2.2	1.5	2.1	1.5	2.4	5.2	1.7	2.2	3.1
S13	PleasantDogs_valence	33	female	100	288.5	0	2.5	3.13	22	23	23	20	5.4	3.6	5.2	1.2	1.6	1.1	1	1	5.3	3.5	5.2	1.2	2.7	1.1	1.1	1	3.6	1.7	2.2	2.7	1.4	1.5	1.9	1.8	3.8	2.3	2.7	3.1	2.2	1.5	2.1	1.5	2.4	5.2	1.7	2.2	3.1
S13	PleasantDogs_anger	33	female	100	288.5	0	2.5	3.13	22	23	23	20	5.4	3.6	5.2	1.2	1.6	1.1	1	1	5.3	3.5	5.2	1.2	2.7	1.1	1.1	1	3.6	1.7	2.2	2.7	1.4	1.5	1.9	1.8	3.8	2.3	2.7	3.1	2.2	1.5	2.1	1.5	2.4	5.2	1.7	2.2	3.1
S13	PleasantDogs_surprise	33	female	100	288.5	0	2.5	3.13	22	23	23	20	5.4	3.6	5.2	1.2	1.6	1.1	1	1	5.3	3.5	5.2	1.2	2.7	1.1	1.1	1	3.6	1.7	2.2	2.7	1.4	1.5	1.9	1.8	3.8	2.3	2.7	3.1	2.2	1.5	2.1	1.5	2.4	5.2	1.7	2.2	3.1
S13	PleasantHumans_arousal	33	female	100	288.5	0	2.5	3.13	22	23	23	20	5.4	3.6	5.2	1.2	1.6	1.1	1	1	5.3	3.5	5.2	1.2	2.7	1.1	1.1	1	3.6	1.7	2.2	2.7	1.4	1.5	1.9	1.8	3.8	2.3	2.7	3.1	2.2	1.5	2.1	1.5	2.4	5.2	1.7	2.2	3.1
S13	PleasantHumans_happiness	33	female	100	288.5	0	2.5	3.13	22	23	23	20	5.4	3.6	5.2	1.2	1.6	1.1	1	1	5.3	3.5	5.2	1.2	2.7	1.1	1.1	1	3.6	1.7	2.2	2.7	1.4	1.5	1.9	1.8	3.8	2.3	2.7	3.1	2.2	1.5	2.1	1.5	2.4	5.2	1.7	2.2	3.1
S13	PleasantHumans_disgust	33	female	100	288.5	0	2.5	3.13	22	23	23	20	5.4	3.6	5.2	1.2	1.6	1.1	1	1	5.3	3.5	5.2	1.2	2.7	1.1	1.1	1	3.6	1.7	2.2	2.7	1.4	1.5	1.9	1.8	3.8	2.3	2.7	3.1	2.2	1.5	2.1	1.5	2.4	5.2	1.7	2.2	3.1
S13	PleasantHumans_fear	33	female	100	288.5	0	2.5	3.13	22	23	23	20	5.4	3.6	5.2	1.2	1.6	1.1	1	1	5.3	3.5	5.2	1.2	2.7	1.1	1.1	1	3.6	1.7	2.2	2.7	1.4	1.5	1.9	1.8	3.8	2.3	2.7	3.1	2.2	1.5	2.1	1.5	2.4	5.2	1.7	2.2	3.1
S13	PleasantHumans_sadness	33	female	100	288.5	0	2.5	3.13	22	23	23	20	5.4	3.6	5.2	1.2	1.6	1.1	1	1	5.3	3.5	5.2	1.2	2.7	1.1	1.1	1	3.6	1.7	2.2	2.7	1.4	1.5	1.9	1.8	3.8	2.3	2.7	3.1	2.2	1.5	2.1	1.5	2.4	5.2	1.7	2.2	3.1
S13	PleasantHumans_valence	33	female	100	288.5	0	2.5	3.13	22	23	23	20	5.4	3.6	5.2	1.2	1.6	1.1	1	1	5.3	3.5	5.2	1.2	2.7	1.1	1.1	1	3.6	1.7	2.2	2.7	1.4	1.5	1.9	1.8	3.8	2.3	2.7	3.1	2.2	1.5	2.1	1.5	2.4	5.2	1.7	2.2	3.1
S13	PleasantHumans_anger	33	female	100	288.5	0	2.5	3.13	22	23	23	20	5.4	3.6	5.2	1.2	1.6	1.1	1	1	5.3	3.5	5.2	1.2	2.7	1.1	1.1	1	3.6	1.7	2.2	2.7	1.4	1.5	1.9	1.8	3.8	2.3	2.7	3.1	2.2	1.5	2.1	1.5	2.4	5.2	1.7	2.2	3.1
S13	PleasantHumans_surprise	33	female	100	288.5	0	2.5	3.13	22	23	23	20	5.4	3.6	5.2	1.2	1.6	1.1	1	1	5.3	3.5	5.2	1.2	2.7	1.1	1.1	1	3.6	1.7	2.2	2.7	1.4	1.5	1.9	1.8	3.8	2.3	2.7	3.1	2.2	1.5	2.1	1.5	2.4	5.2	1.7	2.2	3.1
S13	NeutralDogs_arousal	33	female	100	288.5	0	2.5	3.13	22	23	23	20	5.4	3.6	5.2	1.2	1.6	1.1	1	1	5.3	3.5	5.2	1.2	2.7	1.1	1.1	1	3.6	1.7	2.2	2.7	1.4	1.5	1.9	1.8	3.8	2.3	2.7	3.1	2.2	1.5	2.1	1.5	2.4	5.2	1.7	2.2	3.1
S13	NeutralDogs_happiness	33	female	100	288.5	0	2.5	3.13	22	23	23	20	5.4	3.6	5.2	1.2	1.6	1.1	1	1	5.3	3.5	5.2	1.2	2.7	1.1	1.1	1	3.6	1.7	2.2	2.7	1.4	1.5	1.9	1.8	3.8	2.3	2.7	3.1	2.2	1.5	2.1	1.5	2.4	5.2	1.7	2.2	3.1
S13	NeutralDogs_disgust	33	female	100	288.5	0	2.5	3.13	22	23	23	20	5.4	3.6	5.2	1.2	1.6	1.1	1	1	5.3	3.5	5.2	1.2	2.7	1.1	1.1	1	3.6	1.7	2.2	2.7	1.4	1.5	1.9	1.8	3.8	2.3	2.7	3.1	2.2	1.5	2.1	1.5	2.4	5.2	1.7	2.2	3.1
S13	NeutralDogs_fear	33	female	100	288.5	0	2.5	3.13	22	23	23	20	5.4	3.6	5.2	1.2	1.6	1.1	1	1	5.3	3.5	5.2	1.2	2.7	1.1	1.1	1	3.6	1.7	2.2	2.7	1.4	1.5	1.9	1.8	3.8	2.3	2.7	3.1	2.2	1.5	2.1	1.5	2.4	5.2	1.7	2.2	3.1
S13	NeutralDogs_sadness	33	female	100	288.5	0	2.5	3.13	22	23	23	20	5.4	3.6	5.2	1.2	1.6	1.1	1	1	5.3	3.5	5.2	1.2	2.7	1.1	1.1	1	3.6	1.7	2.2	2.7	1.4	1.5	1.9	1.8	3.8	2.3	2.7	3.1	2.2	1.5	2.1	1.5	2.4	5.2	1.7	2.2	3.1
S13	NeutralDogs_valence	33	female	100	288.5	0	2.5	3.13	22	23	23	20	5.4	3.6	5.2	1.2	1.6	1.1	1	1	5.3	3.5	5.2	1.2	2.7	1.1	1.1	1	3.6	1.7	2.2	2.7	1.4	1.5	1.9	1.8	3.8	2.3	2.7	3.1	2.2	1.5	2.1	1.5	2.4	5.2	1.7	2.2	3.1
S13	NeutralDogs_anger	33	female	100	288.5	0	2.5	3.13	22	23	23	20	5.4	3.6	5.2	1.2	1.6	1.1	1	1	5.3	3.5	5.2	1.2	2.7	1.1	1.1	1	3.6	1.7	2.2	2.7	1.4	1.5	1.9	1.8	3.8	2.3	2.7	3.1	2.2	1.5	2.1	1.5	2.4	5.2	1.7	2.2	3.1
S13	NeutralDogs_surprise	33	female	100	288.5	0	2.5	3.13	22	23	23	20	5.4	3.6	5.2	1.2	1.6	1.1	1	1	5.3	3.5	5.2	1.2	2.7	1.1	1.1	1	3.6	1.7	2.2	2.7	1.4	1.5	1.9	1.8	3.8	2.3	2.7	3.1	2.2	1.5	2.1	1.5	2.4	5.2	1.7	2.2	3.1
S13	NeutralHumans_arousal	33	female	100	288.5	0	2.5	3.13	22	23	23	20	5.4	3.6	5.2	1.2	1.6	1.1	1	1	5.3	3.5	5.2	1.2	2.7	1.1	1.1	1	3.6	1.7	2.2	2.7	1.4	1.5	1.9	1.8	3.8	2.3	2.7	3.1	2.2	1.5	2.1	1.5	2.4	5.2	1.7	2.2	3.1
S13	NeutralHumans_happiness	33	female	100	288.5	0	2.5	3.13	22	23	23	20	5.4	3.6	5.2	1.2	1.6	1.1	1	1	5.3	3.5	5.2	1.2	2.7	1.1	1.1	1	3.6	1.7	2.2	2.7	1.4	1.5	1.9	1.8	3.8	2.3	2.7	3.1	2.2	1.5	2.1	1.5	2.4	5.2	1.7	2.2	3.1
S13	NeutralHumans_disgust	33	female	100	288.5	0	2.5	3.13	22	23	23	20	5.4	3.6	5.2	1.2	1.6	1.1	1	1	5.3	3.5	5.2	1.2	2.7	1.1	1.1	1	3.6	1.7	2.2	2.7	1.4	1.5	1.9	1.8	3.8	2.3	2.7	3.1	2.2	1.5	2.1	1.5	2.4	5.2	1.7	2.2	3.1
S13	NeutralHumans_fear	33	female	100	288.5	0	2.5	3.13	22	23	23	20	5.4	3.6	5.2	1.2	1.6	1.1	1	1	5.3	3.5	5.2	1.2	2.7	1.1	1.1	1	3.6	1.7	2.2	2.7	1.4	1.5	1.9	1.8	3.8	2.3	2.7	3.1	2.2	1.5	2.1	1.5	2.4	5.2	1.7	2.2	3.1
S13	NeutralHumans_sadness	33	female	100	288.5	0	2.5	3.13	22	23	23	20	5.4	3.6	5.2	1.2	1.6	1.1	1	1	5.3	3.5	5.2	1.2	2.7	1.1	1.1	1	3.6	1.7	2.2	2.7	1.4	1.5	1.9	1.8	3.8	2.3	2.7	3.1	2.2	1.5	2.1	1.5	2.4	5.2	1.7	2.2	3.1
S13	NeutralHumans_valence	33	female	100	288.5	0	2.5	3.13	22	23	23	20	5.4	3.6	5.2	1.2	1.6	1.1	1	1	5.3	3.5	5.2	1.2	2.7	1.1	1.1	1	3.6	1.7	2.2	2.7	1.4	1.5	1.9	1.8	3.8	2.3	2.7	3.1	2.2	1.5	2.1	1.5	2.4	5.2	1.7	2.2	3.1
S13	NeutralHumans_anger	33	female	100	288.5	0	2.5	3.13	22	23	23	20	5.4	3.6	5.2	1.2	1.6	1.1	1	1	5.3	3.5	5.2	1.2	2.7	1.1	1.1	1	3.6	1.7	2.2	2.7	1.4	1.5	1.9	1.8	3.8	2.3	2.7	3.1	2.2	1.5	2.1	1.5	2.4	5.2	1.7	2.2	3.1
S13	NeutralHumans_surprise	33	female	100	288.5	0	2.5	3.13	22	23	23	20	5.4	3.6	5.2	1.2	1.6	1.1	1	1	5.3	3.5	5.2	1.2	2.7	1.1	1.1	1	3.6	1.7	2.2	2.7	1.4	1.5	1.9	1.8	3.8	2.3	2.7	3.1	2.2	1.5	2.1	1.5	2.4	5.2	1.7	2.2	3.1
S13	Object_arousal	33	female	100	288.5	0	2.5	3.13	22	23	23	20	5.4	3.6	5.2	1.2	1.6	1.1	1	1	5.3	3.5	5.2	1.2	2.7	1.1	1.1	1	3.6	1.7	2.2	2.7	1.4	1.5	1.9	1.8	3.8	2.3	2.7	3.1	2.2	1.5	2.1	1.5	2.4	5.2	1.7	2.2	3.1
S13	Object_happiness	33	female	100	288.5	0	2.5	3.13	22	23	23	20	5.4	3.6	5.2	1.2	1.6	1.1	1	1	5.3	3.5	5.2	1.2	2.7	1.1	1.1	1	3.6	1.7	2.2	2.7	1.4	1.5	1.9	1.8	3.8	2.3	2.7	3.1	2.2	1.5	2.1	1.5	2.4	5.2	1.7	2.2	3.1
S13	Object_disgust	33	female	100	288.5	0	2.5	3.13	22	23	23	20	5.4	3.6	5.2	1.2	1.6	1.1	1	1	5.3	3.5	5.2	1.2	2.7	1.1	1.1	1	3.6	1.7	2.2	2.7	1.4	1.5	1.9	1.8	3.8	2.3	2.7	3.1	2.2	1.5	2.1	1.5	2.4	5.2	1.7	2.2	3.1
S13	Object_fear	33	female	100	288.5	0	2.5	3.13	22	23	23	20	5.4	3.6	5.2	1.2	1.6	1.1	1	1	5.3	3.5	5.2	1.2	2.7	1.1	1.1	1	3.6	1.7	2.2	2.7	1.4	1.5	1.9	1.8	3.8	2.3	2.7	3.1	2.2	1.5	2.1	1.5	2.4	5.2	1.7	2.2	3.1
S13	Object_sadness	33	female	100	288.5	0	2.5	3.13	22	23	23	20	5.4	3.6	5.2	1.2	1.6	1.1	1	1	5.3	3.5	5.2	1.2	2.7	1.1	1.1	1	3.6	1.7	2.2	2.7	1.4	1.5	1.9	1.8	3.8	2.3	2.7	3.1	2.2	1.5	2.1	1.5	2.4	5.2	1.7	2.2	3.1
S13	Object_valence	33	female	100	288.5	0	2.5	3.13	22	23	23	20	5.4	3.6	5.2	1.2	1.6	1.1	1	1	5.3	3.5	5.2	1.2	2.7	1.1	1.1	1	3.6	1.7	2.2	2.7	1.4	1.5	1.9	1.8	3.8	2.3	2.7	3.1	2.2	1.5	2.1	1.5	2.4	5.2	1.7	2.2	3.1
S13	Object_anger	33	female	100	288.5	0	2.5	3.13	22	23	23	20	5.4	3.6	5.2	1.2	1.6	1.1	1	1	5.3	3.5	5.2	1.2	2.7	1.1	1.1	1	3.6	1.7	2.2	2.7	1.4	1.5	1.9	1.8	3.8	2.3	2.7	3.1	2.2	1.5	2.1	1.5	2.4	5.2	1.7	2.2	3.1
S13	Object_surprise	33	female	100	288.5	0	2.5	3.13	22	23	23	20	5.4	3.6	5.2	1.2	1.6	1.1	1	1	5.3	3.5	5.2	1.2	2.7	1.1	1.1	1	3.6	1.7	2.2	2.7	1.4	1.5	1.9	1.8	3.8	2.3	2.7	3.1	2.2	1.5	2.1	1.5	2.4	5.2	1.7	2.2	3.1
S13	Pixel_arousal	33	female	100	288.5	0	2.5	3.13	22	23	23	20	5.4	3.6	5.2	1.2	1.6	1.1	1	1	5.3	3.5	5.2	1.2	2.7	1.1	1.1	1	3.6	1.7	2.2	2.7	1.4	1.5	1.9	1.8	3.8	2.3	2.7	3.1	2.2	1.5	2.1	1.5	2.4	5.2	1.7	2.2	3.1
S13	Pixel_happiness	33	female	100	288.5	0	2.5	3.13	22	23	23	20	5.4	3.6	5.2	1.2	1.6	1.1	1	1	5.3	3.5	5.2	1.2	2.7	1.1	1.1	1	3.6	1.7	2.2	2.7	1.4	1.5	1.9	1.8	3.8	2.3	2.7	3.1	2.2	1.5	2.1	1.5	2.4	5.2	1.7	2.2	3.1
S13	Pixel_disgust	33	female	100	288.5	0	2.5	3.13	22	23	23	20	5.4	3.6	5.2	1.2	1.6	1.1	1	1	5.3	3.5	5.2	1.2	2.7	1.1	1.1	1	3.6	1.7	2.2	2.7	1.4	1.5	1.9	1.8	3.8	2.3	2.7	3.1	2.2	1.5	2.1	1.5	2.4	5.2	1.7	2.2	3.1
S13	Pixel_fear	33	female	100	288.5	0	2.5	3.13	22	23	23	20	5.4	3.6	5.2	1.2	1.6	1.1	1	1	5.3	3.5	5.2	1.2	2.7	1.1	1.1	1	3.6	1.7	2.2	2.7	1.4	1.5	1.9	1.8	3.8	2.3	2.7	3.1	2.2	1.5	2.1	1.5	2.4	5.2	1.7	2.2	3.1
S13	Pixel_sadness	33	female	100	288.5	0	2.5	3.13	22	23	23	20	5.4	3.6	5.2	1.2	1.6	1.1	1	1	5.3	3.5	5.2	1.2	2.7	1.1	1.1	1	3.6	1.7	2.2	2.7	1.4	1.5	1.9	1.8	3.8	2.3	2.7	3.1	2.2	1.5	2.1	1.5	2.4	5.2	1.7	2.2	3.1
S13	Pixel_valence	33	female	100	288.5	0	2.5	3.13	22	23	23	20	5.4	3.6	5.2	1.2	1.6	1.1	1	1	5.3	3.5	5.2	1.2	2.7	1.1	1.1	1	3.6	1.7	2.2	2.7	1.4	1.5	1.9	1.8	3.8	2.3	2.7	3.1	2.2	1.5	2.1	1.5	2.4	5.2	1.7	2.2	3.1
S13	Pixel_anger	33	female	100	288.5	0	2.5	3.13	22	23	23	20	5.4	3.6	5.2	1.2	1.6	1.1	1	1	5.3	3.5	5.2	1.2	2.7	1.1	1.1	1	3.6	1.7	2.2	2.7	1.4	1.5	1.9	1.8	3.8	2.3	2.7	3.1	2.2	1.5	2.1	1.5	2.4	5.2	1.7	2.2	3.1
S13	Pixel_surprise	33	female	100	288.5	0	2.5	3.13	22	23	23	20	5.4	3.6	5.2	1.2	1.6	1.1	1	1	5.3	3.5	5.2	1.2	2.7	1.1	1.1	1	3.6	1.7	2.2	2.7	1.4	1.5	1.9	1.8	3.8	2.3	2.7	3.1	2.2	1.5	2.1	1.5	2.4	5.2	1.7	2.2	3.1
S14	ThreateningDogs_arousal	27	male	90	350.5	11	2.25	3.13	16	19	19	17	5.8	4.4	5.7	1	3.8	1	1	1	4.6	2.6	2.8	1.2	2.1	1	1.2	1	3.4	2.4	1.5	2.3	2.2	2	2	1.8	3.5	2.5	2	2.4	2.4	2.1	2.3	1.9	3	4.3	1.4	2.8	3.9
S14	ThreateningDogs_happiness	27	male	90	350.5	11	2.25	3.13	16	19	19	17	5.8	4.4	5.7	1	3.8	1	1	1	4.6	2.6	2.8	1.2	2.1	1	1.2	1	3.4	2.4	1.5	2.3	2.2	2	2	1.8	3.5	2.5	2	2.4	2.4	2.1	2.3	1.9	3	4.3	1.4	2.8	3.9
S14	ThreateningDogs_disgust	27	male	90	350.5	11	2.25	3.13	16	19	19	17	5.8	4.4	5.7	1	3.8	1	1	1	4.6	2.6	2.8	1.2	2.1	1	1.2	1	3.4	2.4	1.5	2.3	2.2	2	2	1.8	3.5	2.5	2	2.4	2.4	2.1	2.3	1.9	3	4.3	1.4	2.8	3.9
S14	ThreateningDogs_fear	27	male	90	350.5	11	2.25	3.13	16	19	19	17	5.8	4.4	5.7	1	3.8	1	1	1	4.6	2.6	2.8	1.2	2.1	1	1.2	1	3.4	2.4	1.5	2.3	2.2	2	2	1.8	3.5	2.5	2	2.4	2.4	2.1	2.3	1.9	3	4.3	1.4	2.8	3.9
S14	ThreateningDogs_sadness	27	male	90	350.5	11	2.25	3.13	16	19	19	17	5.8	4.4	5.7	1	3.8	1	1	1	4.6	2.6	2.8	1.2	2.1	1	1.2	1	3.4	2.4	1.5	2.3	2.2	2	2	1.8	3.5	2.5	2	2.4	2.4	2.1	2.3	1.9	3	4.3	1.4	2.8	3.9
S14	ThreateningDogs_valence	27	male	90	350.5	11	2.25	3.13	16	19	19	17	5.8	4.4	5.7	1	3.8	1	1	1	4.6	2.6	2.8	1.2	2.1	1	1.2	1	3.4	2.4	1.5	2.3	2.2	2	2	1.8	3.5	2.5	2	2.4	2.4	2.1	2.3	1.9	3	4.3	1.4	2.8	3.9
S14	ThreateningDogs_anger	27	male	90	350.5	11	2.25	3.13	16	19	19	17	5.8	4.4	5.7	1	3.8	1	1	1	4.6	2.6	2.8	1.2	2.1	1	1.2	1	3.4	2.4	1.5	2.3	2.2	2	2	1.8	3.5	2.5	2	2.4	2.4	2.1	2.3	1.9	3	4.3	1.4	2.8	3.9
S14	ThreateningDogs_surprise	27	male	90	350.5	11	2.25	3.13	16	19	19	17	5.8	4.4	5.7	1	3.8	1	1	1	4.6	2.6	2.8	1.2	2.1	1	1.2	1	3.4	2.4	1.5	2.3	2.2	2	2	1.8	3.5	2.5	2	2.4	2.4	2.1	2.3	1.9	3	4.3	1.4	2.8	3.9
S14	ThreateningHumans_arousal	27	male	90	350.5	11	2.25	3.13	16	19	19	17	5.8	4.4	5.7	1	3.8	1	1	1	4.6	2.6	2.8	1.2	2.1	1	1.2	1	3.4	2.4	1.5	2.3	2.2	2	2	1.8	3.5	2.5	2	2.4	2.4	2.1	2.3	1.9	3	4.3	1.4	2.8	3.9
S14	ThreateningHumans_happiness	27	male	90	350.5	11	2.25	3.13	16	19	19	17	5.8	4.4	5.7	1	3.8	1	1	1	4.6	2.6	2.8	1.2	2.1	1	1.2	1	3.4	2.4	1.5	2.3	2.2	2	2	1.8	3.5	2.5	2	2.4	2.4	2.1	2.3	1.9	3	4.3	1.4	2.8	3.9
S14	ThreateningHumans_disgust	27	male	90	350.5	11	2.25	3.13	16	19	19	17	5.8	4.4	5.7	1	3.8	1	1	1	4.6	2.6	2.8	1.2	2.1	1	1.2	1	3.4	2.4	1.5	2.3	2.2	2	2	1.8	3.5	2.5	2	2.4	2.4	2.1	2.3	1.9	3	4.3	1.4	2.8	3.9
S14	ThreateningHumans_fear	27	male	90	350.5	11	2.25	3.13	16	19	19	17	5.8	4.4	5.7	1	3.8	1	1	1	4.6	2.6	2.8	1.2	2.1	1	1.2	1	3.4	2.4	1.5	2.3	2.2	2	2	1.8	3.5	2.5	2	2.4	2.4	2.1	2.3	1.9	3	4.3	1.4	2.8	3.9
S14	ThreateningHumans_sadness	27	male	90	350.5	11	2.25	3.13	16	19	19	17	5.8	4.4	5.7	1	3.8	1	1	1	4.6	2.6	2.8	1.2	2.1	1	1.2	1	3.4	2.4	1.5	2.3	2.2	2	2	1.8	3.5	2.5	2	2.4	2.4	2.1	2.3	1.9	3	4.3	1.4	2.8	3.9
S14	ThreateningHumans_valence	27	male	90	350.5	11	2.25	3.13	16	19	19	17	5.8	4.4	5.7	1	3.8	1	1	1	4.6	2.6	2.8	1.2	2.1	1	1.2	1	3.4	2.4	1.5	2.3	2.2	2	2	1.8	3.5	2.5	2	2.4	2.4	2.1	2.3	1.9	3	4.3	1.4	2.8	3.9
S14	ThreateningHumans_anger	27	male	90	350.5	11	2.25	3.13	16	19	19	17	5.8	4.4	5.7	1	3.8	1	1	1	4.6	2.6	2.8	1.2	2.1	1	1.2	1	3.4	2.4	1.5	2.3	2.2	2	2	1.8	3.5	2.5	2	2.4	2.4	2.1	2.3	1.9	3	4.3	1.4	2.8	3.9
S14	ThreateningHumans_surprise	27	male	90	350.5	11	2.25	3.13	16	19	19	17	5.8	4.4	5.7	1	3.8	1	1	1	4.6	2.6	2.8	1.2	2.1	1	1.2	1	3.4	2.4	1.5	2.3	2.2	2	2	1.8	3.5	2.5	2	2.4	2.4	2.1	2.3	1.9	3	4.3	1.4	2.8	3.9
S14	PleasantDogs_arousal	27	male	90	350.5	11	2.25	3.13	16	19	19	17	5.8	4.4	5.7	1	3.8	1	1	1	4.6	2.6	2.8	1.2	2.1	1	1.2	1	3.4	2.4	1.5	2.3	2.2	2	2	1.8	3.5	2.5	2	2.4	2.4	2.1	2.3	1.9	3	4.3	1.4	2.8	3.9
S14	PleasantDogs_happiness	27	male	90	350.5	11	2.25	3.13	16	19	19	17	5.8	4.4	5.7	1	3.8	1	1	1	4.6	2.6	2.8	1.2	2.1	1	1.2	1	3.4	2.4	1.5	2.3	2.2	2	2	1.8	3.5	2.5	2	2.4	2.4	2.1	2.3	1.9	3	4.3	1.4	2.8	3.9
S14	PleasantDogs_disgust	27	male	90	350.5	11	2.25	3.13	16	19	19	17	5.8	4.4	5.7	1	3.8	1	1	1	4.6	2.6	2.8	1.2	2.1	1	1.2	1	3.4	2.4	1.5	2.3	2.2	2	2	1.8	3.5	2.5	2	2.4	2.4	2.1	2.3	1.9	3	4.3	1.4	2.8	3.9
S14	PleasantDogs_fear	27	male	90	350.5	11	2.25	3.13	16	19	19	17	5.8	4.4	5.7	1	3.8	1	1	1	4.6	2.6	2.8	1.2	2.1	1	1.2	1	3.4	2.4	1.5	2.3	2.2	2	2	1.8	3.5	2.5	2	2.4	2.4	2.1	2.3	1.9	3	4.3	1.4	2.8	3.9
S14	PleasantDogs_sadness	27	male	90	350.5	11	2.25	3.13	16	19	19	17	5.8	4.4	5.7	1	3.8	1	1	1	4.6	2.6	2.8	1.2	2.1	1	1.2	1	3.4	2.4	1.5	2.3	2.2	2	2	1.8	3.5	2.5	2	2.4	2.4	2.1	2.3	1.9	3	4.3	1.4	2.8	3.9
S14	PleasantDogs_valence	27	male	90	350.5	11	2.25	3.13	16	19	19	17	5.8	4.4	5.7	1	3.8	1	1	1	4.6	2.6	2.8	1.2	2.1	1	1.2	1	3.4	2.4	1.5	2.3	2.2	2	2	1.8	3.5	2.5	2	2.4	2.4	2.1	2.3	1.9	3	4.3	1.4	2.8	3.9
S14	PleasantDogs_anger	27	male	90	350.5	11	2.25	3.13	16	19	19	17	5.8	4.4	5.7	1	3.8	1	1	1	4.6	2.6	2.8	1.2	2.1	1	1.2	1	3.4	2.4	1.5	2.3	2.2	2	2	1.8	3.5	2.5	2	2.4	2.4	2.1	2.3	1.9	3	4.3	1.4	2.8	3.9
S14	PleasantDogs_surprise	27	male	90	350.5	11	2.25	3.13	16	19	19	17	5.8	4.4	5.7	1	3.8	1	1	1	4.6	2.6	2.8	1.2	2.1	1	1.2	1	3.4	2.4	1.5	2.3	2.2	2	2	1.8	3.5	2.5	2	2.4	2.4	2.1	2.3	1.9	3	4.3	1.4	2.8	3.9
S14	PleasantHumans_arousal	27	male	90	350.5	11	2.25	3.13	16	19	19	17	5.8	4.4	5.7	1	3.8	1	1	1	4.6	2.6	2.8	1.2	2.1	1	1.2	1	3.4	2.4	1.5	2.3	2.2	2	2	1.8	3.5	2.5	2	2.4	2.4	2.1	2.3	1.9	3	4.3	1.4	2.8	3.9
S14	PleasantHumans_happiness	27	male	90	350.5	11	2.25	3.13	16	19	19	17	5.8	4.4	5.7	1	3.8	1	1	1	4.6	2.6	2.8	1.2	2.1	1	1.2	1	3.4	2.4	1.5	2.3	2.2	2	2	1.8	3.5	2.5	2	2.4	2.4	2.1	2.3	1.9	3	4.3	1.4	2.8	3.9
S14	PleasantHumans_disgust	27	male	90	350.5	11	2.25	3.13	16	19	19	17	5.8	4.4	5.7	1	3.8	1	1	1	4.6	2.6	2.8	1.2	2.1	1	1.2	1	3.4	2.4	1.5	2.3	2.2	2	2	1.8	3.5	2.5	2	2.4	2.4	2.1	2.3	1.9	3	4.3	1.4	2.8	3.9
S14	PleasantHumans_fear	27	male	90	350.5	11	2.25	3.13	16	19	19	17	5.8	4.4	5.7	1	3.8	1	1	1	4.6	2.6	2.8	1.2	2.1	1	1.2	1	3.4	2.4	1.5	2.3	2.2	2	2	1.8	3.5	2.5	2	2.4	2.4	2.1	2.3	1.9	3	4.3	1.4	2.8	3.9
S14	PleasantHumans_sadness	27	male	90	350.5	11	2.25	3.13	16	19	19	17	5.8	4.4	5.7	1	3.8	1	1	1	4.6	2.6	2.8	1.2	2.1	1	1.2	1	3.4	2.4	1.5	2.3	2.2	2	2	1.8	3.5	2.5	2	2.4	2.4	2.1	2.3	1.9	3	4.3	1.4	2.8	3.9
S14	PleasantHumans_valence	27	male	90	350.5	11	2.25	3.13	16	19	19	17	5.8	4.4	5.7	1	3.8	1	1	1	4.6	2.6	2.8	1.2	2.1	1	1.2	1	3.4	2.4	1.5	2.3	2.2	2	2	1.8	3.5	2.5	2	2.4	2.4	2.1	2.3	1.9	3	4.3	1.4	2.8	3.9
S14	PleasantHumans_anger	27	male	90	350.5	11	2.25	3.13	16	19	19	17	5.8	4.4	5.7	1	3.8	1	1	1	4.6	2.6	2.8	1.2	2.1	1	1.2	1	3.4	2.4	1.5	2.3	2.2	2	2	1.8	3.5	2.5	2	2.4	2.4	2.1	2.3	1.9	3	4.3	1.4	2.8	3.9
S14	PleasantHumans_surprise	27	male	90	350.5	11	2.25	3.13	16	19	19	17	5.8	4.4	5.7	1	3.8	1	1	1	4.6	2.6	2.8	1.2	2.1	1	1.2	1	3.4	2.4	1.5	2.3	2.2	2	2	1.8	3.5	2.5	2	2.4	2.4	2.1	2.3	1.9	3	4.3	1.4	2.8	3.9
S14	NeutralDogs_arousal	27	male	90	350.5	11	2.25	3.13	16	19	19	17	5.8	4.4	5.7	1	3.8	1	1	1	4.6	2.6	2.8	1.2	2.1	1	1.2	1	3.4	2.4	1.5	2.3	2.2	2	2	1.8	3.5	2.5	2	2.4	2.4	2.1	2.3	1.9	3	4.3	1.4	2.8	3.9
S14	NeutralDogs_happiness	27	male	90	350.5	11	2.25	3.13	16	19	19	17	5.8	4.4	5.7	1	3.8	1	1	1	4.6	2.6	2.8	1.2	2.1	1	1.2	1	3.4	2.4	1.5	2.3	2.2	2	2	1.8	3.5	2.5	2	2.4	2.4	2.1	2.3	1.9	3	4.3	1.4	2.8	3.9
S14	NeutralDogs_disgust	27	male	90	350.5	11	2.25	3.13	16	19	19	17	5.8	4.4	5.7	1	3.8	1	1	1	4.6	2.6	2.8	1.2	2.1	1	1.2	1	3.4	2.4	1.5	2.3	2.2	2	2	1.8	3.5	2.5	2	2.4	2.4	2.1	2.3	1.9	3	4.3	1.4	2.8	3.9
S14	NeutralDogs_fear	27	male	90	350.5	11	2.25	3.13	16	19	19	17	5.8	4.4	5.7	1	3.8	1	1	1	4.6	2.6	2.8	1.2	2.1	1	1.2	1	3.4	2.4	1.5	2.3	2.2	2	2	1.8	3.5	2.5	2	2.4	2.4	2.1	2.3	1.9	3	4.3	1.4	2.8	3.9
S14	NeutralDogs_sadness	27	male	90	350.5	11	2.25	3.13	16	19	19	17	5.8	4.4	5.7	1	3.8	1	1	1	4.6	2.6	2.8	1.2	2.1	1	1.2	1	3.4	2.4	1.5	2.3	2.2	2	2	1.8	3.5	2.5	2	2.4	2.4	2.1	2.3	1.9	3	4.3	1.4	2.8	3.9
S14	NeutralDogs_valence	27	male	90	350.5	11	2.25	3.13	16	19	19	17	5.8	4.4	5.7	1	3.8	1	1	1	4.6	2.6	2.8	1.2	2.1	1	1.2	1	3.4	2.4	1.5	2.3	2.2	2	2	1.8	3.5	2.5	2	2.4	2.4	2.1	2.3	1.9	3	4.3	1.4	2.8	3.9
S14	NeutralDogs_anger	27	male	90	350.5	11	2.25	3.13	16	19	19	17	5.8	4.4	5.7	1	3.8	1	1	1	4.6	2.6	2.8	1.2	2.1	1	1.2	1	3.4	2.4	1.5	2.3	2.2	2	2	1.8	3.5	2.5	2	2.4	2.4	2.1	2.3	1.9	3	4.3	1.4	2.8	3.9
S14	NeutralDogs_surprise	27	male	90	350.5	11	2.25	3.13	16	19	19	17	5.8	4.4	5.7	1	3.8	1	1	1	4.6	2.6	2.8	1.2	2.1	1	1.2	1	3.4	2.4	1.5	2.3	2.2	2	2	1.8	3.5	2.5	2	2.4	2.4	2.1	2.3	1.9	3	4.3	1.4	2.8	3.9
S14	NeutralHumans_arousal	27	male	90	350.5	11	2.25	3.13	16	19	19	17	5.8	4.4	5.7	1	3.8	1	1	1	4.6	2.6	2.8	1.2	2.1	1	1.2	1	3.4	2.4	1.5	2.3	2.2	2	2	1.8	3.5	2.5	2	2.4	2.4	2.1	2.3	1.9	3	4.3	1.4	2.8	3.9
S14	NeutralHumans_happiness	27	male	90	350.5	11	2.25	3.13	16	19	19	17	5.8	4.4	5.7	1	3.8	1	1	1	4.6	2.6	2.8	1.2	2.1	1	1.2	1	3.4	2.4	1.5	2.3	2.2	2	2	1.8	3.5	2.5	2	2.4	2.4	2.1	2.3	1.9	3	4.3	1.4	2.8	3.9
S14	NeutralHumans_disgust	27	male	90	350.5	11	2.25	3.13	16	19	19	17	5.8	4.4	5.7	1	3.8	1	1	1	4.6	2.6	2.8	1.2	2.1	1	1.2	1	3.4	2.4	1.5	2.3	2.2	2	2	1.8	3.5	2.5	2	2.4	2.4	2.1	2.3	1.9	3	4.3	1.4	2.8	3.9
S14	NeutralHumans_fear	27	male	90	350.5	11	2.25	3.13	16	19	19	17	5.8	4.4	5.7	1	3.8	1	1	1	4.6	2.6	2.8	1.2	2.1	1	1.2	1	3.4	2.4	1.5	2.3	2.2	2	2	1.8	3.5	2.5	2	2.4	2.4	2.1	2.3	1.9	3	4.3	1.4	2.8	3.9
S14	NeutralHumans_sadness	27	male	90	350.5	11	2.25	3.13	16	19	19	17	5.8	4.4	5.7	1	3.8	1	1	1	4.6	2.6	2.8	1.2	2.1	1	1.2	1	3.4	2.4	1.5	2.3	2.2	2	2	1.8	3.5	2.5	2	2.4	2.4	2.1	2.3	1.9	3	4.3	1.4	2.8	3.9
S14	NeutralHumans_valence	27	male	90	350.5	11	2.25	3.13	16	19	19	17	5.8	4.4	5.7	1	3.8	1	1	1	4.6	2.6	2.8	1.2	2.1	1	1.2	1	3.4	2.4	1.5	2.3	2.2	2	2	1.8	3.5	2.5	2	2.4	2.4	2.1	2.3	1.9	3	4.3	1.4	2.8	3.9
S14	NeutralHumans_anger	27	male	90	350.5	11	2.25	3.13	16	19	19	17	5.8	4.4	5.7	1	3.8	1	1	1	4.6	2.6	2.8	1.2	2.1	1	1.2	1	3.4	2.4	1.5	2.3	2.2	2	2	1.8	3.5	2.5	2	2.4	2.4	2.1	2.3	1.9	3	4.3	1.4	2.8	3.9
S14	NeutralHumans_surprise	27	male	90	350.5	11	2.25	3.13	16	19	19	17	5.8	4.4	5.7	1	3.8	1	1	1	4.6	2.6	2.8	1.2	2.1	1	1.2	1	3.4	2.4	1.5	2.3	2.2	2	2	1.8	3.5	2.5	2	2.4	2.4	2.1	2.3	1.9	3	4.3	1.4	2.8	3.9
S14	Object_arousal	27	male	90	350.5	11	2.25	3.13	16	19	19	17	5.8	4.4	5.7	1	3.8	1	1	1	4.6	2.6	2.8	1.2	2.1	1	1.2	1	3.4	2.4	1.5	2.3	2.2	2	2	1.8	3.5	2.5	2	2.4	2.4	2.1	2.3	1.9	3	4.3	1.4	2.8	3.9
S14	Object_happiness	27	male	90	350.5	11	2.25	3.13	16	19	19	17	5.8	4.4	5.7	1	3.8	1	1	1	4.6	2.6	2.8	1.2	2.1	1	1.2	1	3.4	2.4	1.5	2.3	2.2	2	2	1.8	3.5	2.5	2	2.4	2.4	2.1	2.3	1.9	3	4.3	1.4	2.8	3.9
S14	Object_disgust	27	male	90	350.5	11	2.25	3.13	16	19	19	17	5.8	4.4	5.7	1	3.8	1	1	1	4.6	2.6	2.8	1.2	2.1	1	1.2	1	3.4	2.4	1.5	2.3	2.2	2	2	1.8	3.5	2.5	2	2.4	2.4	2.1	2.3	1.9	3	4.3	1.4	2.8	3.9
S14	Object_fear	27	male	90	350.5	11	2.25	3.13	16	19	19	17	5.8	4.4	5.7	1	3.8	1	1	1	4.6	2.6	2.8	1.2	2.1	1	1.2	1	3.4	2.4	1.5	2.3	2.2	2	2	1.8	3.5	2.5	2	2.4	2.4	2.1	2.3	1.9	3	4.3	1.4	2.8	3.9
S14	Object_sadness	27	male	90	350.5	11	2.25	3.13	16	19	19	17	5.8	4.4	5.7	1	3.8	1	1	1	4.6	2.6	2.8	1.2	2.1	1	1.2	1	3.4	2.4	1.5	2.3	2.2	2	2	1.8	3.5	2.5	2	2.4	2.4	2.1	2.3	1.9	3	4.3	1.4	2.8	3.9
S14	Object_valence	27	male	90	350.5	11	2.25	3.13	16	19	19	17	5.8	4.4	5.7	1	3.8	1	1	1	4.6	2.6	2.8	1.2	2.1	1	1.2	1	3.4	2.4	1.5	2.3	2.2	2	2	1.8	3.5	2.5	2	2.4	2.4	2.1	2.3	1.9	3	4.3	1.4	2.8	3.9
S14	Object_anger	27	male	90	350.5	11	2.25	3.13	16	19	19	17	5.8	4.4	5.7	1	3.8	1	1	1	4.6	2.6	2.8	1.2	2.1	1	1.2	1	3.4	2.4	1.5	2.3	2.2	2	2	1.8	3.5	2.5	2	2.4	2.4	2.1	2.3	1.9	3	4.3	1.4	2.8	3.9
S14	Object_surprise	27	male	90	350.5	11	2.25	3.13	16	19	19	17	5.8	4.4	5.7	1	3.8	1	1	1	4.6	2.6	2.8	1.2	2.1	1	1.2	1	3.4	2.4	1.5	2.3	2.2	2	2	1.8	3.5	2.5	2	2.4	2.4	2.1	2.3	1.9	3	4.3	1.4	2.8	3.9
S14	Pixel_arousal	27	male	90	350.5	11	2.25	3.13	16	19	19	17	5.8	4.4	5.7	1	3.8	1	1	1	4.6	2.6	2.8	1.2	2.1	1	1.2	1	3.4	2.4	1.5	2.3	2.2	2	2	1.8	3.5	2.5	2	2.4	2.4	2.1	2.3	1.9	3	4.3	1.4	2.8	3.9
S14	Pixel_happiness	27	male	90	350.5	11	2.25	3.13	16	19	19	17	5.8	4.4	5.7	1	3.8	1	1	1	4.6	2.6	2.8	1.2	2.1	1	1.2	1	3.4	2.4	1.5	2.3	2.2	2	2	1.8	3.5	2.5	2	2.4	2.4	2.1	2.3	1.9	3	4.3	1.4	2.8	3.9
S14	Pixel_disgust	27	male	90	350.5	11	2.25	3.13	16	19	19	17	5.8	4.4	5.7	1	3.8	1	1	1	4.6	2.6	2.8	1.2	2.1	1	1.2	1	3.4	2.4	1.5	2.3	2.2	2	2	1.8	3.5	2.5	2	2.4	2.4	2.1	2.3	1.9	3	4.3	1.4	2.8	3.9
S14	Pixel_fear	27	male	90	350.5	11	2.25	3.13	16	19	19	17	5.8	4.4	5.7	1	3.8	1	1	1	4.6	2.6	2.8	1.2	2.1	1	1.2	1	3.4	2.4	1.5	2.3	2.2	2	2	1.8	3.5	2.5	2	2.4	2.4	2.1	2.3	1.9	3	4.3	1.4	2.8	3.9
S14	Pixel_sadness	27	male	90	350.5	11	2.25	3.13	16	19	19	17	5.8	4.4	5.7	1	3.8	1	1	1	4.6	2.6	2.8	1.2	2.1	1	1.2	1	3.4	2.4	1.5	2.3	2.2	2	2	1.8	3.5	2.5	2	2.4	2.4	2.1	2.3	1.9	3	4.3	1.4	2.8	3.9
S14	Pixel_valence	27	male	90	350.5	11	2.25	3.13	16	19	19	17	5.8	4.4	5.7	1	3.8	1	1	1	4.6	2.6	2.8	1.2	2.1	1	1.2	1	3.4	2.4	1.5	2.3	2.2	2	2	1.8	3.5	2.5	2	2.4	2.4	2.1	2.3	1.9	3	4.3	1.4	2.8	3.9
S14	Pixel_anger	27	male	90	350.5	11	2.25	3.13	16	19	19	17	5.8	4.4	5.7	1	3.8	1	1	1	4.6	2.6	2.8	1.2	2.1	1	1.2	1	3.4	2.4	1.5	2.3	2.2	2	2	1.8	3.5	2.5	2	2.4	2.4	2.1	2.3	1.9	3	4.3	1.4	2.8	3.9
S14	Pixel_surprise	27	male	90	350.5	11	2.25	3.13	16	19	19	17	5.8	4.4	5.7	1	3.8	1	1	1	4.6	2.6	2.8	1.2	2.1	1	1.2	1	3.4	2.4	1.5	2.3	2.2	2	2	1.8	3.5	2.5	2	2.4	2.4	2.1	2.3	1.9	3	4.3	1.4	2.8	3.9
S15	ThreateningDogs_arousal	35	male	90	195	5	2.88	2	21	15	19	12	5.5	3.1	5.2	1.4	2.7	1.1	1	1.1	5	2.9	3.5	1.4	3.1	1	1.4	1	3.5	2.2	1.2	2.7	1.2	1.4	2	1	3.6	2.5	1.2	2.2	2.3	1.2	2	1.5	2.2	4.9	1.2	1.1	2.4
S15	ThreateningDogs_happiness	35	male	90	195	5	2.88	2	21	15	19	12	5.5	3.1	5.2	1.4	2.7	1.1	1	1.1	5	2.9	3.5	1.4	3.1	1	1.4	1	3.5	2.2	1.2	2.7	1.2	1.4	2	1	3.6	2.5	1.2	2.2	2.3	1.2	2	1.5	2.2	4.9	1.2	1.1	2.4
S15	ThreateningDogs_disgust	35	male	90	195	5	2.88	2	21	15	19	12	5.5	3.1	5.2	1.4	2.7	1.1	1	1.1	5	2.9	3.5	1.4	3.1	1	1.4	1	3.5	2.2	1.2	2.7	1.2	1.4	2	1	3.6	2.5	1.2	2.2	2.3	1.2	2	1.5	2.2	4.9	1.2	1.1	2.4
S15	ThreateningDogs_fear	35	male	90	195	5	2.88	2	21	15	19	12	5.5	3.1	5.2	1.4	2.7	1.1	1	1.1	5	2.9	3.5	1.4	3.1	1	1.4	1	3.5	2.2	1.2	2.7	1.2	1.4	2	1	3.6	2.5	1.2	2.2	2.3	1.2	2	1.5	2.2	4.9	1.2	1.1	2.4
S15	ThreateningDogs_sadness	35	male	90	195	5	2.88	2	21	15	19	12	5.5	3.1	5.2	1.4	2.7	1.1	1	1.1	5	2.9	3.5	1.4	3.1	1	1.4	1	3.5	2.2	1.2	2.7	1.2	1.4	2	1	3.6	2.5	1.2	2.2	2.3	1.2	2	1.5	2.2	4.9	1.2	1.1	2.4
S15	ThreateningDogs_valence	35	male	90	195	5	2.88	2	21	15	19	12	5.5	3.1	5.2	1.4	2.7	1.1	1	1.1	5	2.9	3.5	1.4	3.1	1	1.4	1	3.5	2.2	1.2	2.7	1.2	1.4	2	1	3.6	2.5	1.2	2.2	2.3	1.2	2	1.5	2.2	4.9	1.2	1.1	2.4
S15	ThreateningDogs_anger	35	male	90	195	5	2.88	2	21	15	19	12	5.5	3.1	5.2	1.4	2.7	1.1	1	1.1	5	2.9	3.5	1.4	3.1	1	1.4	1	3.5	2.2	1.2	2.7	1.2	1.4	2	1	3.6	2.5	1.2	2.2	2.3	1.2	2	1.5	2.2	4.9	1.2	1.1	2.4
S15	ThreateningDogs_surprise	35	male	90	195	5	2.88	2	21	15	19	12	5.5	3.1	5.2	1.4	2.7	1.1	1	1.1	5	2.9	3.5	1.4	3.1	1	1.4	1	3.5	2.2	1.2	2.7	1.2	1.4	2	1	3.6	2.5	1.2	2.2	2.3	1.2	2	1.5	2.2	4.9	1.2	1.1	2.4
S15	ThreateningHumans_arousal	35	male	90	195	5	2.88	2	21	15	19	12	5.5	3.1	5.2	1.4	2.7	1.1	1	1.1	5	2.9	3.5	1.4	3.1	1	1.4	1	3.5	2.2	1.2	2.7	1.2	1.4	2	1	3.6	2.5	1.2	2.2	2.3	1.2	2	1.5	2.2	4.9	1.2	1.1	2.4
S15	ThreateningHumans_happiness	35	male	90	195	5	2.88	2	21	15	19	12	5.5	3.1	5.2	1.4	2.7	1.1	1	1.1	5	2.9	3.5	1.4	3.1	1	1.4	1	3.5	2.2	1.2	2.7	1.2	1.4	2	1	3.6	2.5	1.2	2.2	2.3	1.2	2	1.5	2.2	4.9	1.2	1.1	2.4
S15	ThreateningHumans_disgust	35	male	90	195	5	2.88	2	21	15	19	12	5.5	3.1	5.2	1.4	2.7	1.1	1	1.1	5	2.9	3.5	1.4	3.1	1	1.4	1	3.5	2.2	1.2	2.7	1.2	1.4	2	1	3.6	2.5	1.2	2.2	2.3	1.2	2	1.5	2.2	4.9	1.2	1.1	2.4
S15	ThreateningHumans_fear	35	male	90	195	5	2.88	2	21	15	19	12	5.5	3.1	5.2	1.4	2.7	1.1	1	1.1	5	2.9	3.5	1.4	3.1	1	1.4	1	3.5	2.2	1.2	2.7	1.2	1.4	2	1	3.6	2.5	1.2	2.2	2.3	1.2	2	1.5	2.2	4.9	1.2	1.1	2.4
S15	ThreateningHumans_sadness	35	male	90	195	5	2.88	2	21	15	19	12	5.5	3.1	5.2	1.4	2.7	1.1	1	1.1	5	2.9	3.5	1.4	3.1	1	1.4	1	3.5	2.2	1.2	2.7	1.2	1.4	2	1	3.6	2.5	1.2	2.2	2.3	1.2	2	1.5	2.2	4.9	1.2	1.1	2.4
S15	ThreateningHumans_valence	35	male	90	195	5	2.88	2	21	15	19	12	5.5	3.1	5.2	1.4	2.7	1.1	1	1.1	5	2.9	3.5	1.4	3.1	1	1.4	1	3.5	2.2	1.2	2.7	1.2	1.4	2	1	3.6	2.5	1.2	2.2	2.3	1.2	2	1.5	2.2	4.9	1.2	1.1	2.4
S15	ThreateningHumans_anger	35	male	90	195	5	2.88	2	21	15	19	12	5.5	3.1	5.2	1.4	2.7	1.1	1	1.1	5	2.9	3.5	1.4	3.1	1	1.4	1	3.5	2.2	1.2	2.7	1.2	1.4	2	1	3.6	2.5	1.2	2.2	2.3	1.2	2	1.5	2.2	4.9	1.2	1.1	2.4
S15	ThreateningHumans_surprise	35	male	90	195	5	2.88	2	21	15	19	12	5.5	3.1	5.2	1.4	2.7	1.1	1	1.1	5	2.9	3.5	1.4	3.1	1	1.4	1	3.5	2.2	1.2	2.7	1.2	1.4	2	1	3.6	2.5	1.2	2.2	2.3	1.2	2	1.5	2.2	4.9	1.2	1.1	2.4
S15	PleasantDogs_arousal	35	male	90	195	5	2.88	2	21	15	19	12	5.5	3.1	5.2	1.4	2.7	1.1	1	1.1	5	2.9	3.5	1.4	3.1	1	1.4	1	3.5	2.2	1.2	2.7	1.2	1.4	2	1	3.6	2.5	1.2	2.2	2.3	1.2	2	1.5	2.2	4.9	1.2	1.1	2.4
S15	PleasantDogs_happiness	35	male	90	195	5	2.88	2	21	15	19	12	5.5	3.1	5.2	1.4	2.7	1.1	1	1.1	5	2.9	3.5	1.4	3.1	1	1.4	1	3.5	2.2	1.2	2.7	1.2	1.4	2	1	3.6	2.5	1.2	2.2	2.3	1.2	2	1.5	2.2	4.9	1.2	1.1	2.4
S15	PleasantDogs_disgust	35	male	90	195	5	2.88	2	21	15	19	12	5.5	3.1	5.2	1.4	2.7	1.1	1	1.1	5	2.9	3.5	1.4	3.1	1	1.4	1	3.5	2.2	1.2	2.7	1.2	1.4	2	1	3.6	2.5	1.2	2.2	2.3	1.2	2	1.5	2.2	4.9	1.2	1.1	2.4
S15	PleasantDogs_fear	35	male	90	195	5	2.88	2	21	15	19	12	5.5	3.1	5.2	1.4	2.7	1.1	1	1.1	5	2.9	3.5	1.4	3.1	1	1.4	1	3.5	2.2	1.2	2.7	1.2	1.4	2	1	3.6	2.5	1.2	2.2	2.3	1.2	2	1.5	2.2	4.9	1.2	1.1	2.4
S15	PleasantDogs_sadness	35	male	90	195	5	2.88	2	21	15	19	12	5.5	3.1	5.2	1.4	2.7	1.1	1	1.1	5	2.9	3.5	1.4	3.1	1	1.4	1	3.5	2.2	1.2	2.7	1.2	1.4	2	1	3.6	2.5	1.2	2.2	2.3	1.2	2	1.5	2.2	4.9	1.2	1.1	2.4
S15	PleasantDogs_valence	35	male	90	195	5	2.88	2	21	15	19	12	5.5	3.1	5.2	1.4	2.7	1.1	1	1.1	5	2.9	3.5	1.4	3.1	1	1.4	1	3.5	2.2	1.2	2.7	1.2	1.4	2	1	3.6	2.5	1.2	2.2	2.3	1.2	2	1.5	2.2	4.9	1.2	1.1	2.4
S15	PleasantDogs_anger	35	male	90	195	5	2.88	2	21	15	19	12	5.5	3.1	5.2	1.4	2.7	1.1	1	1.1	5	2.9	3.5	1.4	3.1	1	1.4	1	3.5	2.2	1.2	2.7	1.2	1.4	2	1	3.6	2.5	1.2	2.2	2.3	1.2	2	1.5	2.2	4.9	1.2	1.1	2.4
S15	PleasantDogs_surprise	35	male	90	195	5	2.88	2	21	15	19	12	5.5	3.1	5.2	1.4	2.7	1.1	1	1.1	5	2.9	3.5	1.4	3.1	1	1.4	1	3.5	2.2	1.2	2.7	1.2	1.4	2	1	3.6	2.5	1.2	2.2	2.3	1.2	2	1.5	2.2	4.9	1.2	1.1	2.4
S15	PleasantHumans_arousal	35	male	90	195	5	2.88	2	21	15	19	12	5.5	3.1	5.2	1.4	2.7	1.1	1	1.1	5	2.9	3.5	1.4	3.1	1	1.4	1	3.5	2.2	1.2	2.7	1.2	1.4	2	1	3.6	2.5	1.2	2.2	2.3	1.2	2	1.5	2.2	4.9	1.2	1.1	2.4
S15	PleasantHumans_happiness	35	male	90	195	5	2.88	2	21	15	19	12	5.5	3.1	5.2	1.4	2.7	1.1	1	1.1	5	2.9	3.5	1.4	3.1	1	1.4	1	3.5	2.2	1.2	2.7	1.2	1.4	2	1	3.6	2.5	1.2	2.2	2.3	1.2	2	1.5	2.2	4.9	1.2	1.1	2.4
S15	PleasantHumans_disgust	35	male	90	195	5	2.88	2	21	15	19	12	5.5	3.1	5.2	1.4	2.7	1.1	1	1.1	5	2.9	3.5	1.4	3.1	1	1.4	1	3.5	2.2	1.2	2.7	1.2	1.4	2	1	3.6	2.5	1.2	2.2	2.3	1.2	2	1.5	2.2	4.9	1.2	1.1	2.4
S15	PleasantHumans_fear	35	male	90	195	5	2.88	2	21	15	19	12	5.5	3.1	5.2	1.4	2.7	1.1	1	1.1	5	2.9	3.5	1.4	3.1	1	1.4	1	3.5	2.2	1.2	2.7	1.2	1.4	2	1	3.6	2.5	1.2	2.2	2.3	1.2	2	1.5	2.2	4.9	1.2	1.1	2.4
S15	PleasantHumans_sadness	35	male	90	195	5	2.88	2	21	15	19	12	5.5	3.1	5.2	1.4	2.7	1.1	1	1.1	5	2.9	3.5	1.4	3.1	1	1.4	1	3.5	2.2	1.2	2.7	1.2	1.4	2	1	3.6	2.5	1.2	2.2	2.3	1.2	2	1.5	2.2	4.9	1.2	1.1	2.4
S15	PleasantHumans_valence	35	male	90	195	5	2.88	2	21	15	19	12	5.5	3.1	5.2	1.4	2.7	1.1	1	1.1	5	2.9	3.5	1.4	3.1	1	1.4	1	3.5	2.2	1.2	2.7	1.2	1.4	2	1	3.6	2.5	1.2	2.2	2.3	1.2	2	1.5	2.2	4.9	1.2	1.1	2.4
S15	PleasantHumans_anger	35	male	90	195	5	2.88	2	21	15	19	12	5.5	3.1	5.2	1.4	2.7	1.1	1	1.1	5	2.9	3.5	1.4	3.1	1	1.4	1	3.5	2.2	1.2	2.7	1.2	1.4	2	1	3.6	2.5	1.2	2.2	2.3	1.2	2	1.5	2.2	4.9	1.2	1.1	2.4
S15	PleasantHumans_surprise	35	male	90	195	5	2.88	2	21	15	19	12	5.5	3.1	5.2	1.4	2.7	1.1	1	1.1	5	2.9	3.5	1.4	3.1	1	1.4	1	3.5	2.2	1.2	2.7	1.2	1.4	2	1	3.6	2.5	1.2	2.2	2.3	1.2	2	1.5	2.2	4.9	1.2	1.1	2.4
S15	NeutralDogs_arousal	35	male	90	195	5	2.88	2	21	15	19	12	5.5	3.1	5.2	1.4	2.7	1.1	1	1.1	5	2.9	3.5	1.4	3.1	1	1.4	1	3.5	2.2	1.2	2.7	1.2	1.4	2	1	3.6	2.5	1.2	2.2	2.3	1.2	2	1.5	2.2	4.9	1.2	1.1	2.4
S15	NeutralDogs_happiness	35	male	90	195	5	2.88	2	21	15	19	12	5.5	3.1	5.2	1.4	2.7	1.1	1	1.1	5	2.9	3.5	1.4	3.1	1	1.4	1	3.5	2.2	1.2	2.7	1.2	1.4	2	1	3.6	2.5	1.2	2.2	2.3	1.2	2	1.5	2.2	4.9	1.2	1.1	2.4
S15	NeutralDogs_disgust	35	male	90	195	5	2.88	2	21	15	19	12	5.5	3.1	5.2	1.4	2.7	1.1	1	1.1	5	2.9	3.5	1.4	3.1	1	1.4	1	3.5	2.2	1.2	2.7	1.2	1.4	2	1	3.6	2.5	1.2	2.2	2.3	1.2	2	1.5	2.2	4.9	1.2	1.1	2.4
S15	NeutralDogs_fear	35	male	90	195	5	2.88	2	21	15	19	12	5.5	3.1	5.2	1.4	2.7	1.1	1	1.1	5	2.9	3.5	1.4	3.1	1	1.4	1	3.5	2.2	1.2	2.7	1.2	1.4	2	1	3.6	2.5	1.2	2.2	2.3	1.2	2	1.5	2.2	4.9	1.2	1.1	2.4
S15	NeutralDogs_sadness	35	male	90	195	5	2.88	2	21	15	19	12	5.5	3.1	5.2	1.4	2.7	1.1	1	1.1	5	2.9	3.5	1.4	3.1	1	1.4	1	3.5	2.2	1.2	2.7	1.2	1.4	2	1	3.6	2.5	1.2	2.2	2.3	1.2	2	1.5	2.2	4.9	1.2	1.1	2.4
S15	NeutralDogs_valence	35	male	90	195	5	2.88	2	21	15	19	12	5.5	3.1	5.2	1.4	2.7	1.1	1	1.1	5	2.9	3.5	1.4	3.1	1	1.4	1	3.5	2.2	1.2	2.7	1.2	1.4	2	1	3.6	2.5	1.2	2.2	2.3	1.2	2	1.5	2.2	4.9	1.2	1.1	2.4
S15	NeutralDogs_anger	35	male	90	195	5	2.88	2	21	15	19	12	5.5	3.1	5.2	1.4	2.7	1.1	1	1.1	5	2.9	3.5	1.4	3.1	1	1.4	1	3.5	2.2	1.2	2.7	1.2	1.4	2	1	3.6	2.5	1.2	2.2	2.3	1.2	2	1.5	2.2	4.9	1.2	1.1	2.4
S15	NeutralDogs_surprise	35	male	90	195	5	2.88	2	21	15	19	12	5.5	3.1	5.2	1.4	2.7	1.1	1	1.1	5	2.9	3.5	1.4	3.1	1	1.4	1	3.5	2.2	1.2	2.7	1.2	1.4	2	1	3.6	2.5	1.2	2.2	2.3	1.2	2	1.5	2.2	4.9	1.2	1.1	2.4
S15	NeutralHumans_arousal	35	male	90	195	5	2.88	2	21	15	19	12	5.5	3.1	5.2	1.4	2.7	1.1	1	1.1	5	2.9	3.5	1.4	3.1	1	1.4	1	3.5	2.2	1.2	2.7	1.2	1.4	2	1	3.6	2.5	1.2	2.2	2.3	1.2	2	1.5	2.2	4.9	1.2	1.1	2.4
S15	NeutralHumans_happiness	35	male	90	195	5	2.88	2	21	15	19	12	5.5	3.1	5.2	1.4	2.7	1.1	1	1.1	5	2.9	3.5	1.4	3.1	1	1.4	1	3.5	2.2	1.2	2.7	1.2	1.4	2	1	3.6	2.5	1.2	2.2	2.3	1.2	2	1.5	2.2	4.9	1.2	1.1	2.4
S15	NeutralHumans_disgust	35	male	90	195	5	2.88	2	21	15	19	12	5.5	3.1	5.2	1.4	2.7	1.1	1	1.1	5	2.9	3.5	1.4	3.1	1	1.4	1	3.5	2.2	1.2	2.7	1.2	1.4	2	1	3.6	2.5	1.2	2.2	2.3	1.2	2	1.5	2.2	4.9	1.2	1.1	2.4
S15	NeutralHumans_fear	35	male	90	195	5	2.88	2	21	15	19	12	5.5	3.1	5.2	1.4	2.7	1.1	1	1.1	5	2.9	3.5	1.4	3.1	1	1.4	1	3.5	2.2	1.2	2.7	1.2	1.4	2	1	3.6	2.5	1.2	2.2	2.3	1.2	2	1.5	2.2	4.9	1.2	1.1	2.4
S15	NeutralHumans_sadness	35	male	90	195	5	2.88	2	21	15	19	12	5.5	3.1	5.2	1.4	2.7	1.1	1	1.1	5	2.9	3.5	1.4	3.1	1	1.4	1	3.5	2.2	1.2	2.7	1.2	1.4	2	1	3.6	2.5	1.2	2.2	2.3	1.2	2	1.5	2.2	4.9	1.2	1.1	2.4
S15	NeutralHumans_valence	35	male	90	195	5	2.88	2	21	15	19	12	5.5	3.1	5.2	1.4	2.7	1.1	1	1.1	5	2.9	3.5	1.4	3.1	1	1.4	1	3.5	2.2	1.2	2.7	1.2	1.4	2	1	3.6	2.5	1.2	2.2	2.3	1.2	2	1.5	2.2	4.9	1.2	1.1	2.4
S15	NeutralHumans_anger	35	male	90	195	5	2.88	2	21	15	19	12	5.5	3.1	5.2	1.4	2.7	1.1	1	1.1	5	2.9	3.5	1.4	3.1	1	1.4	1	3.5	2.2	1.2	2.7	1.2	1.4	2	1	3.6	2.5	1.2	2.2	2.3	1.2	2	1.5	2.2	4.9	1.2	1.1	2.4
S15	NeutralHumans_surprise	35	male	90	195	5	2.88	2	21	15	19	12	5.5	3.1	5.2	1.4	2.7	1.1	1	1.1	5	2.9	3.5	1.4	3.1	1	1.4	1	3.5	2.2	1.2	2.7	1.2	1.4	2	1	3.6	2.5	1.2	2.2	2.3	1.2	2	1.5	2.2	4.9	1.2	1.1	2.4
S15	Object_arousal	35	male	90	195	5	2.88	2	21	15	19	12	5.5	3.1	5.2	1.4	2.7	1.1	1	1.1	5	2.9	3.5	1.4	3.1	1	1.4	1	3.5	2.2	1.2	2.7	1.2	1.4	2	1	3.6	2.5	1.2	2.2	2.3	1.2	2	1.5	2.2	4.9	1.2	1.1	2.4
S15	Object_happiness	35	male	90	195	5	2.88	2	21	15	19	12	5.5	3.1	5.2	1.4	2.7	1.1	1	1.1	5	2.9	3.5	1.4	3.1	1	1.4	1	3.5	2.2	1.2	2.7	1.2	1.4	2	1	3.6	2.5	1.2	2.2	2.3	1.2	2	1.5	2.2	4.9	1.2	1.1	2.4
S15	Object_disgust	35	male	90	195	5	2.88	2	21	15	19	12	5.5	3.1	5.2	1.4	2.7	1.1	1	1.1	5	2.9	3.5	1.4	3.1	1	1.4	1	3.5	2.2	1.2	2.7	1.2	1.4	2	1	3.6	2.5	1.2	2.2	2.3	1.2	2	1.5	2.2	4.9	1.2	1.1	2.4
S15	Object_fear	35	male	90	195	5	2.88	2	21	15	19	12	5.5	3.1	5.2	1.4	2.7	1.1	1	1.1	5	2.9	3.5	1.4	3.1	1	1.4	1	3.5	2.2	1.2	2.7	1.2	1.4	2	1	3.6	2.5	1.2	2.2	2.3	1.2	2	1.5	2.2	4.9	1.2	1.1	2.4
S15	Object_sadness	35	male	90	195	5	2.88	2	21	15	19	12	5.5	3.1	5.2	1.4	2.7	1.1	1	1.1	5	2.9	3.5	1.4	3.1	1	1.4	1	3.5	2.2	1.2	2.7	1.2	1.4	2	1	3.6	2.5	1.2	2.2	2.3	1.2	2	1.5	2.2	4.9	1.2	1.1	2.4
S15	Object_valence	35	male	90	195	5	2.88	2	21	15	19	12	5.5	3.1	5.2	1.4	2.7	1.1	1	1.1	5	2.9	3.5	1.4	3.1	1	1.4	1	3.5	2.2	1.2	2.7	1.2	1.4	2	1	3.6	2.5	1.2	2.2	2.3	1.2	2	1.5	2.2	4.9	1.2	1.1	2.4
S15	Object_anger	35	male	90	195	5	2.88	2	21	15	19	12	5.5	3.1	5.2	1.4	2.7	1.1	1	1.1	5	2.9	3.5	1.4	3.1	1	1.4	1	3.5	2.2	1.2	2.7	1.2	1.4	2	1	3.6	2.5	1.2	2.2	2.3	1.2	2	1.5	2.2	4.9	1.2	1.1	2.4
S15	Object_surprise	35	male	90	195	5	2.88	2	21	15	19	12	5.5	3.1	5.2	1.4	2.7	1.1	1	1.1	5	2.9	3.5	1.4	3.1	1	1.4	1	3.5	2.2	1.2	2.7	1.2	1.4	2	1	3.6	2.5	1.2	2.2	2.3	1.2	2	1.5	2.2	4.9	1.2	1.1	2.4
S15	Pixel_arousal	35	male	90	195	5	2.88	2	21	15	19	12	5.5	3.1	5.2	1.4	2.7	1.1	1	1.1	5	2.9	3.5	1.4	3.1	1	1.4	1	3.5	2.2	1.2	2.7	1.2	1.4	2	1	3.6	2.5	1.2	2.2	2.3	1.2	2	1.5	2.2	4.9	1.2	1.1	2.4
S15	Pixel_happiness	35	male	90	195	5	2.88	2	21	15	19	12	5.5	3.1	5.2	1.4	2.7	1.1	1	1.1	5	2.9	3.5	1.4	3.1	1	1.4	1	3.5	2.2	1.2	2.7	1.2	1.4	2	1	3.6	2.5	1.2	2.2	2.3	1.2	2	1.5	2.2	4.9	1.2	1.1	2.4
S15	Pixel_disgust	35	male	90	195	5	2.88	2	21	15	19	12	5.5	3.1	5.2	1.4	2.7	1.1	1	1.1	5	2.9	3.5	1.4	3.1	1	1.4	1	3.5	2.2	1.2	2.7	1.2	1.4	2	1	3.6	2.5	1.2	2.2	2.3	1.2	2	1.5	2.2	4.9	1.2	1.1	2.4
S15	Pixel_fear	35	male	90	195	5	2.88	2	21	15	19	12	5.5	3.1	5.2	1.4	2.7	1.1	1	1.1	5	2.9	3.5	1.4	3.1	1	1.4	1	3.5	2.2	1.2	2.7	1.2	1.4	2	1	3.6	2.5	1.2	2.2	2.3	1.2	2	1.5	2.2	4.9	1.2	1.1	2.4
S15	Pixel_sadness	35	male	90	195	5	2.88	2	21	15	19	12	5.5	3.1	5.2	1.4	2.7	1.1	1	1.1	5	2.9	3.5	1.4	3.1	1	1.4	1	3.5	2.2	1.2	2.7	1.2	1.4	2	1	3.6	2.5	1.2	2.2	2.3	1.2	2	1.5	2.2	4.9	1.2	1.1	2.4
S15	Pixel_valence	35	male	90	195	5	2.88	2	21	15	19	12	5.5	3.1	5.2	1.4	2.7	1.1	1	1.1	5	2.9	3.5	1.4	3.1	1	1.4	1	3.5	2.2	1.2	2.7	1.2	1.4	2	1	3.6	2.5	1.2	2.2	2.3	1.2	2	1.5	2.2	4.9	1.2	1.1	2.4
S15	Pixel_anger	35	male	90	195	5	2.88	2	21	15	19	12	5.5	3.1	5.2	1.4	2.7	1.1	1	1.1	5	2.9	3.5	1.4	3.1	1	1.4	1	3.5	2.2	1.2	2.7	1.2	1.4	2	1	3.6	2.5	1.2	2.2	2.3	1.2	2	1.5	2.2	4.9	1.2	1.1	2.4
S15	Pixel_surprise	35	male	90	195	5	2.88	2	21	15	19	12	5.5	3.1	5.2	1.4	2.7	1.1	1	1.1	5	2.9	3.5	1.4	3.1	1	1.4	1	3.5	2.2	1.2	2.7	1.2	1.4	2	1	3.6	2.5	1.2	2.2	2.3	1.2	2	1.5	2.2	4.9	1.2	1.1	2.4
S16	ThreateningDogs_arousal	38	male	80	163	0	3.25	2.63	22	24	22	14	5.7	3.2	5.7	1	2.1	1	1	1	5.8	2.9	5.1	1	1.9	1	1	1	3.8	1.6	2.4	2.3	1	1.4	1.5	1.2	3.9	1.9	2.3	2	1.2	1.1	1.3	1.3	1.8	5	1.2	1.7	2.3
S16	ThreateningDogs_happiness	38	male	80	163	0	3.25	2.63	22	24	22	14	5.7	3.2	5.7	1	2.1	1	1	1	5.8	2.9	5.1	1	1.9	1	1	1	3.8	1.6	2.4	2.3	1	1.4	1.5	1.2	3.9	1.9	2.3	2	1.2	1.1	1.3	1.3	1.8	5	1.2	1.7	2.3
S16	ThreateningDogs_disgust	38	male	80	163	0	3.25	2.63	22	24	22	14	5.7	3.2	5.7	1	2.1	1	1	1	5.8	2.9	5.1	1	1.9	1	1	1	3.8	1.6	2.4	2.3	1	1.4	1.5	1.2	3.9	1.9	2.3	2	1.2	1.1	1.3	1.3	1.8	5	1.2	1.7	2.3
S16	ThreateningDogs_fear	38	male	80	163	0	3.25	2.63	22	24	22	14	5.7	3.2	5.7	1	2.1	1	1	1	5.8	2.9	5.1	1	1.9	1	1	1	3.8	1.6	2.4	2.3	1	1.4	1.5	1.2	3.9	1.9	2.3	2	1.2	1.1	1.3	1.3	1.8	5	1.2	1.7	2.3
S16	ThreateningDogs_sadness	38	male	80	163	0	3.25	2.63	22	24	22	14	5.7	3.2	5.7	1	2.1	1	1	1	5.8	2.9	5.1	1	1.9	1	1	1	3.8	1.6	2.4	2.3	1	1.4	1.5	1.2	3.9	1.9	2.3	2	1.2	1.1	1.3	1.3	1.8	5	1.2	1.7	2.3
S16	ThreateningDogs_valence	38	male	80	163	0	3.25	2.63	22	24	22	14	5.7	3.2	5.7	1	2.1	1	1	1	5.8	2.9	5.1	1	1.9	1	1	1	3.8	1.6	2.4	2.3	1	1.4	1.5	1.2	3.9	1.9	2.3	2	1.2	1.1	1.3	1.3	1.8	5	1.2	1.7	2.3
S16	ThreateningDogs_anger	38	male	80	163	0	3.25	2.63	22	24	22	14	5.7	3.2	5.7	1	2.1	1	1	1	5.8	2.9	5.1	1	1.9	1	1	1	3.8	1.6	2.4	2.3	1	1.4	1.5	1.2	3.9	1.9	2.3	2	1.2	1.1	1.3	1.3	1.8	5	1.2	1.7	2.3
S16	ThreateningDogs_surprise	38	male	80	163	0	3.25	2.63	22	24	22	14	5.7	3.2	5.7	1	2.1	1	1	1	5.8	2.9	5.1	1	1.9	1	1	1	3.8	1.6	2.4	2.3	1	1.4	1.5	1.2	3.9	1.9	2.3	2	1.2	1.1	1.3	1.3	1.8	5	1.2	1.7	2.3
S16	ThreateningHumans_arousal	38	male	80	163	0	3.25	2.63	22	24	22	14	5.7	3.2	5.7	1	2.1	1	1	1	5.8	2.9	5.1	1	1.9	1	1	1	3.8	1.6	2.4	2.3	1	1.4	1.5	1.2	3.9	1.9	2.3	2	1.2	1.1	1.3	1.3	1.8	5	1.2	1.7	2.3
S16	ThreateningHumans_happiness	38	male	80	163	0	3.25	2.63	22	24	22	14	5.7	3.2	5.7	1	2.1	1	1	1	5.8	2.9	5.1	1	1.9	1	1	1	3.8	1.6	2.4	2.3	1	1.4	1.5	1.2	3.9	1.9	2.3	2	1.2	1.1	1.3	1.3	1.8	5	1.2	1.7	2.3
S16	ThreateningHumans_disgust	38	male	80	163	0	3.25	2.63	22	24	22	14	5.7	3.2	5.7	1	2.1	1	1	1	5.8	2.9	5.1	1	1.9	1	1	1	3.8	1.6	2.4	2.3	1	1.4	1.5	1.2	3.9	1.9	2.3	2	1.2	1.1	1.3	1.3	1.8	5	1.2	1.7	2.3
S16	ThreateningHumans_fear	38	male	80	163	0	3.25	2.63	22	24	22	14	5.7	3.2	5.7	1	2.1	1	1	1	5.8	2.9	5.1	1	1.9	1	1	1	3.8	1.6	2.4	2.3	1	1.4	1.5	1.2	3.9	1.9	2.3	2	1.2	1.1	1.3	1.3	1.8	5	1.2	1.7	2.3
S16	ThreateningHumans_sadness	38	male	80	163	0	3.25	2.63	22	24	22	14	5.7	3.2	5.7	1	2.1	1	1	1	5.8	2.9	5.1	1	1.9	1	1	1	3.8	1.6	2.4	2.3	1	1.4	1.5	1.2	3.9	1.9	2.3	2	1.2	1.1	1.3	1.3	1.8	5	1.2	1.7	2.3
S16	ThreateningHumans_valence	38	male	80	163	0	3.25	2.63	22	24	22	14	5.7	3.2	5.7	1	2.1	1	1	1	5.8	2.9	5.1	1	1.9	1	1	1	3.8	1.6	2.4	2.3	1	1.4	1.5	1.2	3.9	1.9	2.3	2	1.2	1.1	1.3	1.3	1.8	5	1.2	1.7	2.3
S16	ThreateningHumans_anger	38	male	80	163	0	3.25	2.63	22	24	22	14	5.7	3.2	5.7	1	2.1	1	1	1	5.8	2.9	5.1	1	1.9	1	1	1	3.8	1.6	2.4	2.3	1	1.4	1.5	1.2	3.9	1.9	2.3	2	1.2	1.1	1.3	1.3	1.8	5	1.2	1.7	2.3
S16	ThreateningHumans_surprise	38	male	80	163	0	3.25	2.63	22	24	22	14	5.7	3.2	5.7	1	2.1	1	1	1	5.8	2.9	5.1	1	1.9	1	1	1	3.8	1.6	2.4	2.3	1	1.4	1.5	1.2	3.9	1.9	2.3	2	1.2	1.1	1.3	1.3	1.8	5	1.2	1.7	2.3
S16	PleasantDogs_arousal	38	male	80	163	0	3.25	2.63	22	24	22	14	5.7	3.2	5.7	1	2.1	1	1	1	5.8	2.9	5.1	1	1.9	1	1	1	3.8	1.6	2.4	2.3	1	1.4	1.5	1.2	3.9	1.9	2.3	2	1.2	1.1	1.3	1.3	1.8	5	1.2	1.7	2.3
S16	PleasantDogs_happiness	38	male	80	163	0	3.25	2.63	22	24	22	14	5.7	3.2	5.7	1	2.1	1	1	1	5.8	2.9	5.1	1	1.9	1	1	1	3.8	1.6	2.4	2.3	1	1.4	1.5	1.2	3.9	1.9	2.3	2	1.2	1.1	1.3	1.3	1.8	5	1.2	1.7	2.3
S16	PleasantDogs_disgust	38	male	80	163	0	3.25	2.63	22	24	22	14	5.7	3.2	5.7	1	2.1	1	1	1	5.8	2.9	5.1	1	1.9	1	1	1	3.8	1.6	2.4	2.3	1	1.4	1.5	1.2	3.9	1.9	2.3	2	1.2	1.1	1.3	1.3	1.8	5	1.2	1.7	2.3
S16	PleasantDogs_fear	38	male	80	163	0	3.25	2.63	22	24	22	14	5.7	3.2	5.7	1	2.1	1	1	1	5.8	2.9	5.1	1	1.9	1	1	1	3.8	1.6	2.4	2.3	1	1.4	1.5	1.2	3.9	1.9	2.3	2	1.2	1.1	1.3	1.3	1.8	5	1.2	1.7	2.3
S16	PleasantDogs_sadness	38	male	80	163	0	3.25	2.63	22	24	22	14	5.7	3.2	5.7	1	2.1	1	1	1	5.8	2.9	5.1	1	1.9	1	1	1	3.8	1.6	2.4	2.3	1	1.4	1.5	1.2	3.9	1.9	2.3	2	1.2	1.1	1.3	1.3	1.8	5	1.2	1.7	2.3
S16	PleasantDogs_valence	38	male	80	163	0	3.25	2.63	22	24	22	14	5.7	3.2	5.7	1	2.1	1	1	1	5.8	2.9	5.1	1	1.9	1	1	1	3.8	1.6	2.4	2.3	1	1.4	1.5	1.2	3.9	1.9	2.3	2	1.2	1.1	1.3	1.3	1.8	5	1.2	1.7	2.3
S16	PleasantDogs_anger	38	male	80	163	0	3.25	2.63	22	24	22	14	5.7	3.2	5.7	1	2.1	1	1	1	5.8	2.9	5.1	1	1.9	1	1	1	3.8	1.6	2.4	2.3	1	1.4	1.5	1.2	3.9	1.9	2.3	2	1.2	1.1	1.3	1.3	1.8	5	1.2	1.7	2.3
S16	PleasantDogs_surprise	38	male	80	163	0	3.25	2.63	22	24	22	14	5.7	3.2	5.7	1	2.1	1	1	1	5.8	2.9	5.1	1	1.9	1	1	1	3.8	1.6	2.4	2.3	1	1.4	1.5	1.2	3.9	1.9	2.3	2	1.2	1.1	1.3	1.3	1.8	5	1.2	1.7	2.3
S16	PleasantHumans_arousal	38	male	80	163	0	3.25	2.63	22	24	22	14	5.7	3.2	5.7	1	2.1	1	1	1	5.8	2.9	5.1	1	1.9	1	1	1	3.8	1.6	2.4	2.3	1	1.4	1.5	1.2	3.9	1.9	2.3	2	1.2	1.1	1.3	1.3	1.8	5	1.2	1.7	2.3
S16	PleasantHumans_happiness	38	male	80	163	0	3.25	2.63	22	24	22	14	5.7	3.2	5.7	1	2.1	1	1	1	5.8	2.9	5.1	1	1.9	1	1	1	3.8	1.6	2.4	2.3	1	1.4	1.5	1.2	3.9	1.9	2.3	2	1.2	1.1	1.3	1.3	1.8	5	1.2	1.7	2.3
S16	PleasantHumans_disgust	38	male	80	163	0	3.25	2.63	22	24	22	14	5.7	3.2	5.7	1	2.1	1	1	1	5.8	2.9	5.1	1	1.9	1	1	1	3.8	1.6	2.4	2.3	1	1.4	1.5	1.2	3.9	1.9	2.3	2	1.2	1.1	1.3	1.3	1.8	5	1.2	1.7	2.3
S16	PleasantHumans_fear	38	male	80	163	0	3.25	2.63	22	24	22	14	5.7	3.2	5.7	1	2.1	1	1	1	5.8	2.9	5.1	1	1.9	1	1	1	3.8	1.6	2.4	2.3	1	1.4	1.5	1.2	3.9	1.9	2.3	2	1.2	1.1	1.3	1.3	1.8	5	1.2	1.7	2.3
S16	PleasantHumans_sadness	38	male	80	163	0	3.25	2.63	22	24	22	14	5.7	3.2	5.7	1	2.1	1	1	1	5.8	2.9	5.1	1	1.9	1	1	1	3.8	1.6	2.4	2.3	1	1.4	1.5	1.2	3.9	1.9	2.3	2	1.2	1.1	1.3	1.3	1.8	5	1.2	1.7	2.3
S16	PleasantHumans_valence	38	male	80	163	0	3.25	2.63	22	24	22	14	5.7	3.2	5.7	1	2.1	1	1	1	5.8	2.9	5.1	1	1.9	1	1	1	3.8	1.6	2.4	2.3	1	1.4	1.5	1.2	3.9	1.9	2.3	2	1.2	1.1	1.3	1.3	1.8	5	1.2	1.7	2.3
S16	PleasantHumans_anger	38	male	80	163	0	3.25	2.63	22	24	22	14	5.7	3.2	5.7	1	2.1	1	1	1	5.8	2.9	5.1	1	1.9	1	1	1	3.8	1.6	2.4	2.3	1	1.4	1.5	1.2	3.9	1.9	2.3	2	1.2	1.1	1.3	1.3	1.8	5	1.2	1.7	2.3
S16	PleasantHumans_surprise	38	male	80	163	0	3.25	2.63	22	24	22	14	5.7	3.2	5.7	1	2.1	1	1	1	5.8	2.9	5.1	1	1.9	1	1	1	3.8	1.6	2.4	2.3	1	1.4	1.5	1.2	3.9	1.9	2.3	2	1.2	1.1	1.3	1.3	1.8	5	1.2	1.7	2.3
S16	NeutralDogs_arousal	38	male	80	163	0	3.25	2.63	22	24	22	14	5.7	3.2	5.7	1	2.1	1	1	1	5.8	2.9	5.1	1	1.9	1	1	1	3.8	1.6	2.4	2.3	1	1.4	1.5	1.2	3.9	1.9	2.3	2	1.2	1.1	1.3	1.3	1.8	5	1.2	1.7	2.3
S16	NeutralDogs_happiness	38	male	80	163	0	3.25	2.63	22	24	22	14	5.7	3.2	5.7	1	2.1	1	1	1	5.8	2.9	5.1	1	1.9	1	1	1	3.8	1.6	2.4	2.3	1	1.4	1.5	1.2	3.9	1.9	2.3	2	1.2	1.1	1.3	1.3	1.8	5	1.2	1.7	2.3
S16	NeutralDogs_disgust	38	male	80	163	0	3.25	2.63	22	24	22	14	5.7	3.2	5.7	1	2.1	1	1	1	5.8	2.9	5.1	1	1.9	1	1	1	3.8	1.6	2.4	2.3	1	1.4	1.5	1.2	3.9	1.9	2.3	2	1.2	1.1	1.3	1.3	1.8	5	1.2	1.7	2.3
S16	NeutralDogs_fear	38	male	80	163	0	3.25	2.63	22	24	22	14	5.7	3.2	5.7	1	2.1	1	1	1	5.8	2.9	5.1	1	1.9	1	1	1	3.8	1.6	2.4	2.3	1	1.4	1.5	1.2	3.9	1.9	2.3	2	1.2	1.1	1.3	1.3	1.8	5	1.2	1.7	2.3
S16	NeutralDogs_sadness	38	male	80	163	0	3.25	2.63	22	24	22	14	5.7	3.2	5.7	1	2.1	1	1	1	5.8	2.9	5.1	1	1.9	1	1	1	3.8	1.6	2.4	2.3	1	1.4	1.5	1.2	3.9	1.9	2.3	2	1.2	1.1	1.3	1.3	1.8	5	1.2	1.7	2.3
S16	NeutralDogs_valence	38	male	80	163	0	3.25	2.63	22	24	22	14	5.7	3.2	5.7	1	2.1	1	1	1	5.8	2.9	5.1	1	1.9	1	1	1	3.8	1.6	2.4	2.3	1	1.4	1.5	1.2	3.9	1.9	2.3	2	1.2	1.1	1.3	1.3	1.8	5	1.2	1.7	2.3
S16	NeutralDogs_anger	38	male	80	163	0	3.25	2.63	22	24	22	14	5.7	3.2	5.7	1	2.1	1	1	1	5.8	2.9	5.1	1	1.9	1	1	1	3.8	1.6	2.4	2.3	1	1.4	1.5	1.2	3.9	1.9	2.3	2	1.2	1.1	1.3	1.3	1.8	5	1.2	1.7	2.3
S16	NeutralDogs_surprise	38	male	80	163	0	3.25	2.63	22	24	22	14	5.7	3.2	5.7	1	2.1	1	1	1	5.8	2.9	5.1	1	1.9	1	1	1	3.8	1.6	2.4	2.3	1	1.4	1.5	1.2	3.9	1.9	2.3	2	1.2	1.1	1.3	1.3	1.8	5	1.2	1.7	2.3
S16	NeutralHumans_arousal	38	male	80	163	0	3.25	2.63	22	24	22	14	5.7	3.2	5.7	1	2.1	1	1	1	5.8	2.9	5.1	1	1.9	1	1	1	3.8	1.6	2.4	2.3	1	1.4	1.5	1.2	3.9	1.9	2.3	2	1.2	1.1	1.3	1.3	1.8	5	1.2	1.7	2.3
S16	NeutralHumans_happiness	38	male	80	163	0	3.25	2.63	22	24	22	14	5.7	3.2	5.7	1	2.1	1	1	1	5.8	2.9	5.1	1	1.9	1	1	1	3.8	1.6	2.4	2.3	1	1.4	1.5	1.2	3.9	1.9	2.3	2	1.2	1.1	1.3	1.3	1.8	5	1.2	1.7	2.3
S16	NeutralHumans_disgust	38	male	80	163	0	3.25	2.63	22	24	22	14	5.7	3.2	5.7	1	2.1	1	1	1	5.8	2.9	5.1	1	1.9	1	1	1	3.8	1.6	2.4	2.3	1	1.4	1.5	1.2	3.9	1.9	2.3	2	1.2	1.1	1.3	1.3	1.8	5	1.2	1.7	2.3
S16	NeutralHumans_fear	38	male	80	163	0	3.25	2.63	22	24	22	14	5.7	3.2	5.7	1	2.1	1	1	1	5.8	2.9	5.1	1	1.9	1	1	1	3.8	1.6	2.4	2.3	1	1.4	1.5	1.2	3.9	1.9	2.3	2	1.2	1.1	1.3	1.3	1.8	5	1.2	1.7	2.3
S16	NeutralHumans_sadness	38	male	80	163	0	3.25	2.63	22	24	22	14	5.7	3.2	5.7	1	2.1	1	1	1	5.8	2.9	5.1	1	1.9	1	1	1	3.8	1.6	2.4	2.3	1	1.4	1.5	1.2	3.9	1.9	2.3	2	1.2	1.1	1.3	1.3	1.8	5	1.2	1.7	2.3
S16	NeutralHumans_valence	38	male	80	163	0	3.25	2.63	22	24	22	14	5.7	3.2	5.7	1	2.1	1	1	1	5.8	2.9	5.1	1	1.9	1	1	1	3.8	1.6	2.4	2.3	1	1.4	1.5	1.2	3.9	1.9	2.3	2	1.2	1.1	1.3	1.3	1.8	5	1.2	1.7	2.3
S16	NeutralHumans_anger	38	male	80	163	0	3.25	2.63	22	24	22	14	5.7	3.2	5.7	1	2.1	1	1	1	5.8	2.9	5.1	1	1.9	1	1	1	3.8	1.6	2.4	2.3	1	1.4	1.5	1.2	3.9	1.9	2.3	2	1.2	1.1	1.3	1.3	1.8	5	1.2	1.7	2.3
S16	NeutralHumans_surprise	38	male	80	163	0	3.25	2.63	22	24	22	14	5.7	3.2	5.7	1	2.1	1	1	1	5.8	2.9	5.1	1	1.9	1	1	1	3.8	1.6	2.4	2.3	1	1.4	1.5	1.2	3.9	1.9	2.3	2	1.2	1.1	1.3	1.3	1.8	5	1.2	1.7	2.3
S16	Object_arousal	38	male	80	163	0	3.25	2.63	22	24	22	14	5.7	3.2	5.7	1	2.1	1	1	1	5.8	2.9	5.1	1	1.9	1	1	1	3.8	1.6	2.4	2.3	1	1.4	1.5	1.2	3.9	1.9	2.3	2	1.2	1.1	1.3	1.3	1.8	5	1.2	1.7	2.3
S16	Object_happiness	38	male	80	163	0	3.25	2.63	22	24	22	14	5.7	3.2	5.7	1	2.1	1	1	1	5.8	2.9	5.1	1	1.9	1	1	1	3.8	1.6	2.4	2.3	1	1.4	1.5	1.2	3.9	1.9	2.3	2	1.2	1.1	1.3	1.3	1.8	5	1.2	1.7	2.3
S16	Object_disgust	38	male	80	163	0	3.25	2.63	22	24	22	14	5.7	3.2	5.7	1	2.1	1	1	1	5.8	2.9	5.1	1	1.9	1	1	1	3.8	1.6	2.4	2.3	1	1.4	1.5	1.2	3.9	1.9	2.3	2	1.2	1.1	1.3	1.3	1.8	5	1.2	1.7	2.3
S16	Object_fear	38	male	80	163	0	3.25	2.63	22	24	22	14	5.7	3.2	5.7	1	2.1	1	1	1	5.8	2.9	5.1	1	1.9	1	1	1	3.8	1.6	2.4	2.3	1	1.4	1.5	1.2	3.9	1.9	2.3	2	1.2	1.1	1.3	1.3	1.8	5	1.2	1.7	2.3
S16	Object_sadness	38	male	80	163	0	3.25	2.63	22	24	22	14	5.7	3.2	5.7	1	2.1	1	1	1	5.8	2.9	5.1	1	1.9	1	1	1	3.8	1.6	2.4	2.3	1	1.4	1.5	1.2	3.9	1.9	2.3	2	1.2	1.1	1.3	1.3	1.8	5	1.2	1.7	2.3
S16	Object_valence	38	male	80	163	0	3.25	2.63	22	24	22	14	5.7	3.2	5.7	1	2.1	1	1	1	5.8	2.9	5.1	1	1.9	1	1	1	3.8	1.6	2.4	2.3	1	1.4	1.5	1.2	3.9	1.9	2.3	2	1.2	1.1	1.3	1.3	1.8	5	1.2	1.7	2.3
S16	Object_anger	38	male	80	163	0	3.25	2.63	22	24	22	14	5.7	3.2	5.7	1	2.1	1	1	1	5.8	2.9	5.1	1	1.9	1	1	1	3.8	1.6	2.4	2.3	1	1.4	1.5	1.2	3.9	1.9	2.3	2	1.2	1.1	1.3	1.3	1.8	5	1.2	1.7	2.3
S16	Object_surprise	38	male	80	163	0	3.25	2.63	22	24	22	14	5.7	3.2	5.7	1	2.1	1	1	1	5.8	2.9	5.1	1	1.9	1	1	1	3.8	1.6	2.4	2.3	1	1.4	1.5	1.2	3.9	1.9	2.3	2	1.2	1.1	1.3	1.3	1.8	5	1.2	1.7	2.3
S16	Pixel_arousal	38	male	80	163	0	3.25	2.63	22	24	22	14	5.7	3.2	5.7	1	2.1	1	1	1	5.8	2.9	5.1	1	1.9	1	1	1	3.8	1.6	2.4	2.3	1	1.4	1.5	1.2	3.9	1.9	2.3	2	1.2	1.1	1.3	1.3	1.8	5	1.2	1.7	2.3
S16	Pixel_happiness	38	male	80	163	0	3.25	2.63	22	24	22	14	5.7	3.2	5.7	1	2.1	1	1	1	5.8	2.9	5.1	1	1.9	1	1	1	3.8	1.6	2.4	2.3	1	1.4	1.5	1.2	3.9	1.9	2.3	2	1.2	1.1	1.3	1.3	1.8	5	1.2	1.7	2.3
S16	Pixel_disgust	38	male	80	163	0	3.25	2.63	22	24	22	14	5.7	3.2	5.7	1	2.1	1	1	1	5.8	2.9	5.1	1	1.9	1	1	1	3.8	1.6	2.4	2.3	1	1.4	1.5	1.2	3.9	1.9	2.3	2	1.2	1.1	1.3	1.3	1.8	5	1.2	1.7	2.3
S16	Pixel_fear	38	male	80	163	0	3.25	2.63	22	24	22	14	5.7	3.2	5.7	1	2.1	1	1	1	5.8	2.9	5.1	1	1.9	1	1	1	3.8	1.6	2.4	2.3	1	1.4	1.5	1.2	3.9	1.9	2.3	2	1.2	1.1	1.3	1.3	1.8	5	1.2	1.7	2.3
S16	Pixel_sadness	38	male	80	163	0	3.25	2.63	22	24	22	14	5.7	3.2	5.7	1	2.1	1	1	1	5.8	2.9	5.1	1	1.9	1	1	1	3.8	1.6	2.4	2.3	1	1.4	1.5	1.2	3.9	1.9	2.3	2	1.2	1.1	1.3	1.3	1.8	5	1.2	1.7	2.3
S16	Pixel_valence	38	male	80	163	0	3.25	2.63	22	24	22	14	5.7	3.2	5.7	1	2.1	1	1	1	5.8	2.9	5.1	1	1.9	1	1	1	3.8	1.6	2.4	2.3	1	1.4	1.5	1.2	3.9	1.9	2.3	2	1.2	1.1	1.3	1.3	1.8	5	1.2	1.7	2.3
S16	Pixel_anger	38	male	80	163	0	3.25	2.63	22	24	22	14	5.7	3.2	5.7	1	2.1	1	1	1	5.8	2.9	5.1	1	1.9	1	1	1	3.8	1.6	2.4	2.3	1	1.4	1.5	1.2	3.9	1.9	2.3	2	1.2	1.1	1.3	1.3	1.8	5	1.2	1.7	2.3
S16	Pixel_surprise	38	male	80	163	0	3.25	2.63	22	24	22	14	5.7	3.2	5.7	1	2.1	1	1	1	5.8	2.9	5.1	1	1.9	1	1	1	3.8	1.6	2.4	2.3	1	1.4	1.5	1.2	3.9	1.9	2.3	2	1.2	1.1	1.3	1.3	1.8	5	1.2	1.7	2.3
S17	ThreateningDogs_arousal	25	male	80	61.5	0	2.25	1.88	11	21	2	11	5.7	5.4	5.5	1	1.9	1	1.4	1	4.6	3.1	4.3	1.5	1.8	1	1.2	1	3.7	2.8	2.2	2.3	1.2	1	2.2	1.4	3.2	3.3	1.3	4.2	1.1	1	3	1.2	2.8	6	2.1	2.2	2.2
S17	ThreateningDogs_happiness	25	male	80	61.5	0	2.25	1.88	11	21	2	11	5.7	5.4	5.5	1	1.9	1	1.4	1	4.6	3.1	4.3	1.5	1.8	1	1.2	1	3.7	2.8	2.2	2.3	1.2	1	2.2	1.4	3.2	3.3	1.3	4.2	1.1	1	3	1.2	2.8	6	2.1	2.2	2.2
S17	ThreateningDogs_disgust	25	male	80	61.5	0	2.25	1.88	11	21	2	11	5.7	5.4	5.5	1	1.9	1	1.4	1	4.6	3.1	4.3	1.5	1.8	1	1.2	1	3.7	2.8	2.2	2.3	1.2	1	2.2	1.4	3.2	3.3	1.3	4.2	1.1	1	3	1.2	2.8	6	2.1	2.2	2.2
S17	ThreateningDogs_fear	25	male	80	61.5	0	2.25	1.88	11	21	2	11	5.7	5.4	5.5	1	1.9	1	1.4	1	4.6	3.1	4.3	1.5	1.8	1	1.2	1	3.7	2.8	2.2	2.3	1.2	1	2.2	1.4	3.2	3.3	1.3	4.2	1.1	1	3	1.2	2.8	6	2.1	2.2	2.2
S17	ThreateningDogs_sadness	25	male	80	61.5	0	2.25	1.88	11	21	2	11	5.7	5.4	5.5	1	1.9	1	1.4	1	4.6	3.1	4.3	1.5	1.8	1	1.2	1	3.7	2.8	2.2	2.3	1.2	1	2.2	1.4	3.2	3.3	1.3	4.2	1.1	1	3	1.2	2.8	6	2.1	2.2	2.2
S17	ThreateningDogs_valence	25	male	80	61.5	0	2.25	1.88	11	21	2	11	5.7	5.4	5.5	1	1.9	1	1.4	1	4.6	3.1	4.3	1.5	1.8	1	1.2	1	3.7	2.8	2.2	2.3	1.2	1	2.2	1.4	3.2	3.3	1.3	4.2	1.1	1	3	1.2	2.8	6	2.1	2.2	2.2
S17	ThreateningDogs_anger	25	male	80	61.5	0	2.25	1.88	11	21	2	11	5.7	5.4	5.5	1	1.9	1	1.4	1	4.6	3.1	4.3	1.5	1.8	1	1.2	1	3.7	2.8	2.2	2.3	1.2	1	2.2	1.4	3.2	3.3	1.3	4.2	1.1	1	3	1.2	2.8	6	2.1	2.2	2.2
S17	ThreateningDogs_surprise	25	male	80	61.5	0	2.25	1.88	11	21	2	11	5.7	5.4	5.5	1	1.9	1	1.4	1	4.6	3.1	4.3	1.5	1.8	1	1.2	1	3.7	2.8	2.2	2.3	1.2	1	2.2	1.4	3.2	3.3	1.3	4.2	1.1	1	3	1.2	2.8	6	2.1	2.2	2.2
S17	ThreateningHumans_arousal	25	male	80	61.5	0	2.25	1.88	11	21	2	11	5.7	5.4	5.5	1	1.9	1	1.4	1	4.6	3.1	4.3	1.5	1.8	1	1.2	1	3.7	2.8	2.2	2.3	1.2	1	2.2	1.4	3.2	3.3	1.3	4.2	1.1	1	3	1.2	2.8	6	2.1	2.2	2.2
S17	ThreateningHumans_happiness	25	male	80	61.5	0	2.25	1.88	11	21	2	11	5.7	5.4	5.5	1	1.9	1	1.4	1	4.6	3.1	4.3	1.5	1.8	1	1.2	1	3.7	2.8	2.2	2.3	1.2	1	2.2	1.4	3.2	3.3	1.3	4.2	1.1	1	3	1.2	2.8	6	2.1	2.2	2.2
S17	ThreateningHumans_disgust	25	male	80	61.5	0	2.25	1.88	11	21	2	11	5.7	5.4	5.5	1	1.9	1	1.4	1	4.6	3.1	4.3	1.5	1.8	1	1.2	1	3.7	2.8	2.2	2.3	1.2	1	2.2	1.4	3.2	3.3	1.3	4.2	1.1	1	3	1.2	2.8	6	2.1	2.2	2.2
S17	ThreateningHumans_fear	25	male	80	61.5	0	2.25	1.88	11	21	2	11	5.7	5.4	5.5	1	1.9	1	1.4	1	4.6	3.1	4.3	1.5	1.8	1	1.2	1	3.7	2.8	2.2	2.3	1.2	1	2.2	1.4	3.2	3.3	1.3	4.2	1.1	1	3	1.2	2.8	6	2.1	2.2	2.2
S17	ThreateningHumans_sadness	25	male	80	61.5	0	2.25	1.88	11	21	2	11	5.7	5.4	5.5	1	1.9	1	1.4	1	4.6	3.1	4.3	1.5	1.8	1	1.2	1	3.7	2.8	2.2	2.3	1.2	1	2.2	1.4	3.2	3.3	1.3	4.2	1.1	1	3	1.2	2.8	6	2.1	2.2	2.2
S17	ThreateningHumans_valence	25	male	80	61.5	0	2.25	1.88	11	21	2	11	5.7	5.4	5.5	1	1.9	1	1.4	1	4.6	3.1	4.3	1.5	1.8	1	1.2	1	3.7	2.8	2.2	2.3	1.2	1	2.2	1.4	3.2	3.3	1.3	4.2	1.1	1	3	1.2	2.8	6	2.1	2.2	2.2
S17	ThreateningHumans_anger	25	male	80	61.5	0	2.25	1.88	11	21	2	11	5.7	5.4	5.5	1	1.9	1	1.4	1	4.6	3.1	4.3	1.5	1.8	1	1.2	1	3.7	2.8	2.2	2.3	1.2	1	2.2	1.4	3.2	3.3	1.3	4.2	1.1	1	3	1.2	2.8	6	2.1	2.2	2.2
S17	ThreateningHumans_surprise	25	male	80	61.5	0	2.25	1.88	11	21	2	11	5.7	5.4	5.5	1	1.9	1	1.4	1	4.6	3.1	4.3	1.5	1.8	1	1.2	1	3.7	2.8	2.2	2.3	1.2	1	2.2	1.4	3.2	3.3	1.3	4.2	1.1	1	3	1.2	2.8	6	2.1	2.2	2.2
S17	PleasantDogs_arousal	25	male	80	61.5	0	2.25	1.88	11	21	2	11	5.7	5.4	5.5	1	1.9	1	1.4	1	4.6	3.1	4.3	1.5	1.8	1	1.2	1	3.7	2.8	2.2	2.3	1.2	1	2.2	1.4	3.2	3.3	1.3	4.2	1.1	1	3	1.2	2.8	6	2.1	2.2	2.2
S17	PleasantDogs_happiness	25	male	80	61.5	0	2.25	1.88	11	21	2	11	5.7	5.4	5.5	1	1.9	1	1.4	1	4.6	3.1	4.3	1.5	1.8	1	1.2	1	3.7	2.8	2.2	2.3	1.2	1	2.2	1.4	3.2	3.3	1.3	4.2	1.1	1	3	1.2	2.8	6	2.1	2.2	2.2
S17	PleasantDogs_disgust	25	male	80	61.5	0	2.25	1.88	11	21	2	11	5.7	5.4	5.5	1	1.9	1	1.4	1	4.6	3.1	4.3	1.5	1.8	1	1.2	1	3.7	2.8	2.2	2.3	1.2	1	2.2	1.4	3.2	3.3	1.3	4.2	1.1	1	3	1.2	2.8	6	2.1	2.2	2.2
S17	PleasantDogs_fear	25	male	80	61.5	0	2.25	1.88	11	21	2	11	5.7	5.4	5.5	1	1.9	1	1.4	1	4.6	3.1	4.3	1.5	1.8	1	1.2	1	3.7	2.8	2.2	2.3	1.2	1	2.2	1.4	3.2	3.3	1.3	4.2	1.1	1	3	1.2	2.8	6	2.1	2.2	2.2
S17	PleasantDogs_sadness	25	male	80	61.5	0	2.25	1.88	11	21	2	11	5.7	5.4	5.5	1	1.9	1	1.4	1	4.6	3.1	4.3	1.5	1.8	1	1.2	1	3.7	2.8	2.2	2.3	1.2	1	2.2	1.4	3.2	3.3	1.3	4.2	1.1	1	3	1.2	2.8	6	2.1	2.2	2.2
S17	PleasantDogs_valence	25	male	80	61.5	0	2.25	1.88	11	21	2	11	5.7	5.4	5.5	1	1.9	1	1.4	1	4.6	3.1	4.3	1.5	1.8	1	1.2	1	3.7	2.8	2.2	2.3	1.2	1	2.2	1.4	3.2	3.3	1.3	4.2	1.1	1	3	1.2	2.8	6	2.1	2.2	2.2
S17	PleasantDogs_anger	25	male	80	61.5	0	2.25	1.88	11	21	2	11	5.7	5.4	5.5	1	1.9	1	1.4	1	4.6	3.1	4.3	1.5	1.8	1	1.2	1	3.7	2.8	2.2	2.3	1.2	1	2.2	1.4	3.2	3.3	1.3	4.2	1.1	1	3	1.2	2.8	6	2.1	2.2	2.2
S17	PleasantDogs_surprise	25	male	80	61.5	0	2.25	1.88	11	21	2	11	5.7	5.4	5.5	1	1.9	1	1.4	1	4.6	3.1	4.3	1.5	1.8	1	1.2	1	3.7	2.8	2.2	2.3	1.2	1	2.2	1.4	3.2	3.3	1.3	4.2	1.1	1	3	1.2	2.8	6	2.1	2.2	2.2
S17	PleasantHumans_arousal	25	male	80	61.5	0	2.25	1.88	11	21	2	11	5.7	5.4	5.5	1	1.9	1	1.4	1	4.6	3.1	4.3	1.5	1.8	1	1.2	1	3.7	2.8	2.2	2.3	1.2	1	2.2	1.4	3.2	3.3	1.3	4.2	1.1	1	3	1.2	2.8	6	2.1	2.2	2.2
S17	PleasantHumans_happiness	25	male	80	61.5	0	2.25	1.88	11	21	2	11	5.7	5.4	5.5	1	1.9	1	1.4	1	4.6	3.1	4.3	1.5	1.8	1	1.2	1	3.7	2.8	2.2	2.3	1.2	1	2.2	1.4	3.2	3.3	1.3	4.2	1.1	1	3	1.2	2.8	6	2.1	2.2	2.2
S17	PleasantHumans_disgust	25	male	80	61.5	0	2.25	1.88	11	21	2	11	5.7	5.4	5.5	1	1.9	1	1.4	1	4.6	3.1	4.3	1.5	1.8	1	1.2	1	3.7	2.8	2.2	2.3	1.2	1	2.2	1.4	3.2	3.3	1.3	4.2	1.1	1	3	1.2	2.8	6	2.1	2.2	2.2
S17	PleasantHumans_fear	25	male	80	61.5	0	2.25	1.88	11	21	2	11	5.7	5.4	5.5	1	1.9	1	1.4	1	4.6	3.1	4.3	1.5	1.8	1	1.2	1	3.7	2.8	2.2	2.3	1.2	1	2.2	1.4	3.2	3.3	1.3	4.2	1.1	1	3	1.2	2.8	6	2.1	2.2	2.2
S17	PleasantHumans_sadness	25	male	80	61.5	0	2.25	1.88	11	21	2	11	5.7	5.4	5.5	1	1.9	1	1.4	1	4.6	3.1	4.3	1.5	1.8	1	1.2	1	3.7	2.8	2.2	2.3	1.2	1	2.2	1.4	3.2	3.3	1.3	4.2	1.1	1	3	1.2	2.8	6	2.1	2.2	2.2
S17	PleasantHumans_valence	25	male	80	61.5	0	2.25	1.88	11	21	2	11	5.7	5.4	5.5	1	1.9	1	1.4	1	4.6	3.1	4.3	1.5	1.8	1	1.2	1	3.7	2.8	2.2	2.3	1.2	1	2.2	1.4	3.2	3.3	1.3	4.2	1.1	1	3	1.2	2.8	6	2.1	2.2	2.2
S17	PleasantHumans_anger	25	male	80	61.5	0	2.25	1.88	11	21	2	11	5.7	5.4	5.5	1	1.9	1	1.4	1	4.6	3.1	4.3	1.5	1.8	1	1.2	1	3.7	2.8	2.2	2.3	1.2	1	2.2	1.4	3.2	3.3	1.3	4.2	1.1	1	3	1.2	2.8	6	2.1	2.2	2.2
S17	PleasantHumans_surprise	25	male	80	61.5	0	2.25	1.88	11	21	2	11	5.7	5.4	5.5	1	1.9	1	1.4	1	4.6	3.1	4.3	1.5	1.8	1	1.2	1	3.7	2.8	2.2	2.3	1.2	1	2.2	1.4	3.2	3.3	1.3	4.2	1.1	1	3	1.2	2.8	6	2.1	2.2	2.2
S17	NeutralDogs_arousal	25	male	80	61.5	0	2.25	1.88	11	21	2	11	5.7	5.4	5.5	1	1.9	1	1.4	1	4.6	3.1	4.3	1.5	1.8	1	1.2	1	3.7	2.8	2.2	2.3	1.2	1	2.2	1.4	3.2	3.3	1.3	4.2	1.1	1	3	1.2	2.8	6	2.1	2.2	2.2
S17	NeutralDogs_happiness	25	male	80	61.5	0	2.25	1.88	11	21	2	11	5.7	5.4	5.5	1	1.9	1	1.4	1	4.6	3.1	4.3	1.5	1.8	1	1.2	1	3.7	2.8	2.2	2.3	1.2	1	2.2	1.4	3.2	3.3	1.3	4.2	1.1	1	3	1.2	2.8	6	2.1	2.2	2.2
S17	NeutralDogs_disgust	25	male	80	61.5	0	2.25	1.88	11	21	2	11	5.7	5.4	5.5	1	1.9	1	1.4	1	4.6	3.1	4.3	1.5	1.8	1	1.2	1	3.7	2.8	2.2	2.3	1.2	1	2.2	1.4	3.2	3.3	1.3	4.2	1.1	1	3	1.2	2.8	6	2.1	2.2	2.2
S17	NeutralDogs_fear	25	male	80	61.5	0	2.25	1.88	11	21	2	11	5.7	5.4	5.5	1	1.9	1	1.4	1	4.6	3.1	4.3	1.5	1.8	1	1.2	1	3.7	2.8	2.2	2.3	1.2	1	2.2	1.4	3.2	3.3	1.3	4.2	1.1	1	3	1.2	2.8	6	2.1	2.2	2.2
S17	NeutralDogs_sadness	25	male	80	61.5	0	2.25	1.88	11	21	2	11	5.7	5.4	5.5	1	1.9	1	1.4	1	4.6	3.1	4.3	1.5	1.8	1	1.2	1	3.7	2.8	2.2	2.3	1.2	1	2.2	1.4	3.2	3.3	1.3	4.2	1.1	1	3	1.2	2.8	6	2.1	2.2	2.2
S17	NeutralDogs_valence	25	male	80	61.5	0	2.25	1.88	11	21	2	11	5.7	5.4	5.5	1	1.9	1	1.4	1	4.6	3.1	4.3	1.5	1.8	1	1.2	1	3.7	2.8	2.2	2.3	1.2	1	2.2	1.4	3.2	3.3	1.3	4.2	1.1	1	3	1.2	2.8	6	2.1	2.2	2.2
S17	NeutralDogs_anger	25	male	80	61.5	0	2.25	1.88	11	21	2	11	5.7	5.4	5.5	1	1.9	1	1.4	1	4.6	3.1	4.3	1.5	1.8	1	1.2	1	3.7	2.8	2.2	2.3	1.2	1	2.2	1.4	3.2	3.3	1.3	4.2	1.1	1	3	1.2	2.8	6	2.1	2.2	2.2
S17	NeutralDogs_surprise	25	male	80	61.5	0	2.25	1.88	11	21	2	11	5.7	5.4	5.5	1	1.9	1	1.4	1	4.6	3.1	4.3	1.5	1.8	1	1.2	1	3.7	2.8	2.2	2.3	1.2	1	2.2	1.4	3.2	3.3	1.3	4.2	1.1	1	3	1.2	2.8	6	2.1	2.2	2.2
S17	NeutralHumans_arousal	25	male	80	61.5	0	2.25	1.88	11	21	2	11	5.7	5.4	5.5	1	1.9	1	1.4	1	4.6	3.1	4.3	1.5	1.8	1	1.2	1	3.7	2.8	2.2	2.3	1.2	1	2.2	1.4	3.2	3.3	1.3	4.2	1.1	1	3	1.2	2.8	6	2.1	2.2	2.2
S17	NeutralHumans_happiness	25	male	80	61.5	0	2.25	1.88	11	21	2	11	5.7	5.4	5.5	1	1.9	1	1.4	1	4.6	3.1	4.3	1.5	1.8	1	1.2	1	3.7	2.8	2.2	2.3	1.2	1	2.2	1.4	3.2	3.3	1.3	4.2	1.1	1	3	1.2	2.8	6	2.1	2.2	2.2
S17	NeutralHumans_disgust	25	male	80	61.5	0	2.25	1.88	11	21	2	11	5.7	5.4	5.5	1	1.9	1	1.4	1	4.6	3.1	4.3	1.5	1.8	1	1.2	1	3.7	2.8	2.2	2.3	1.2	1	2.2	1.4	3.2	3.3	1.3	4.2	1.1	1	3	1.2	2.8	6	2.1	2.2	2.2
S17	NeutralHumans_fear	25	male	80	61.5	0	2.25	1.88	11	21	2	11	5.7	5.4	5.5	1	1.9	1	1.4	1	4.6	3.1	4.3	1.5	1.8	1	1.2	1	3.7	2.8	2.2	2.3	1.2	1	2.2	1.4	3.2	3.3	1.3	4.2	1.1	1	3	1.2	2.8	6	2.1	2.2	2.2
S17	NeutralHumans_sadness	25	male	80	61.5	0	2.25	1.88	11	21	2	11	5.7	5.4	5.5	1	1.9	1	1.4	1	4.6	3.1	4.3	1.5	1.8	1	1.2	1	3.7	2.8	2.2	2.3	1.2	1	2.2	1.4	3.2	3.3	1.3	4.2	1.1	1	3	1.2	2.8	6	2.1	2.2	2.2
S17	NeutralHumans_valence	25	male	80	61.5	0	2.25	1.88	11	21	2	11	5.7	5.4	5.5	1	1.9	1	1.4	1	4.6	3.1	4.3	1.5	1.8	1	1.2	1	3.7	2.8	2.2	2.3	1.2	1	2.2	1.4	3.2	3.3	1.3	4.2	1.1	1	3	1.2	2.8	6	2.1	2.2	2.2
S17	NeutralHumans_anger	25	male	80	61.5	0	2.25	1.88	11	21	2	11	5.7	5.4	5.5	1	1.9	1	1.4	1	4.6	3.1	4.3	1.5	1.8	1	1.2	1	3.7	2.8	2.2	2.3	1.2	1	2.2	1.4	3.2	3.3	1.3	4.2	1.1	1	3	1.2	2.8	6	2.1	2.2	2.2
S17	NeutralHumans_surprise	25	male	80	61.5	0	2.25	1.88	11	21	2	11	5.7	5.4	5.5	1	1.9	1	1.4	1	4.6	3.1	4.3	1.5	1.8	1	1.2	1	3.7	2.8	2.2	2.3	1.2	1	2.2	1.4	3.2	3.3	1.3	4.2	1.1	1	3	1.2	2.8	6	2.1	2.2	2.2
S17	Object_arousal	25	male	80	61.5	0	2.25	1.88	11	21	2	11	5.7	5.4	5.5	1	1.9	1	1.4	1	4.6	3.1	4.3	1.5	1.8	1	1.2	1	3.7	2.8	2.2	2.3	1.2	1	2.2	1.4	3.2	3.3	1.3	4.2	1.1	1	3	1.2	2.8	6	2.1	2.2	2.2
S17	Object_happiness	25	male	80	61.5	0	2.25	1.88	11	21	2	11	5.7	5.4	5.5	1	1.9	1	1.4	1	4.6	3.1	4.3	1.5	1.8	1	1.2	1	3.7	2.8	2.2	2.3	1.2	1	2.2	1.4	3.2	3.3	1.3	4.2	1.1	1	3	1.2	2.8	6	2.1	2.2	2.2
S17	Object_disgust	25	male	80	61.5	0	2.25	1.88	11	21	2	11	5.7	5.4	5.5	1	1.9	1	1.4	1	4.6	3.1	4.3	1.5	1.8	1	1.2	1	3.7	2.8	2.2	2.3	1.2	1	2.2	1.4	3.2	3.3	1.3	4.2	1.1	1	3	1.2	2.8	6	2.1	2.2	2.2
S17	Object_fear	25	male	80	61.5	0	2.25	1.88	11	21	2	11	5.7	5.4	5.5	1	1.9	1	1.4	1	4.6	3.1	4.3	1.5	1.8	1	1.2	1	3.7	2.8	2.2	2.3	1.2	1	2.2	1.4	3.2	3.3	1.3	4.2	1.1	1	3	1.2	2.8	6	2.1	2.2	2.2
S17	Object_sadness	25	male	80	61.5	0	2.25	1.88	11	21	2	11	5.7	5.4	5.5	1	1.9	1	1.4	1	4.6	3.1	4.3	1.5	1.8	1	1.2	1	3.7	2.8	2.2	2.3	1.2	1	2.2	1.4	3.2	3.3	1.3	4.2	1.1	1	3	1.2	2.8	6	2.1	2.2	2.2
S17	Object_valence	25	male	80	61.5	0	2.25	1.88	11	21	2	11	5.7	5.4	5.5	1	1.9	1	1.4	1	4.6	3.1	4.3	1.5	1.8	1	1.2	1	3.7	2.8	2.2	2.3	1.2	1	2.2	1.4	3.2	3.3	1.3	4.2	1.1	1	3	1.2	2.8	6	2.1	2.2	2.2
S17	Object_anger	25	male	80	61.5	0	2.25	1.88	11	21	2	11	5.7	5.4	5.5	1	1.9	1	1.4	1	4.6	3.1	4.3	1.5	1.8	1	1.2	1	3.7	2.8	2.2	2.3	1.2	1	2.2	1.4	3.2	3.3	1.3	4.2	1.1	1	3	1.2	2.8	6	2.1	2.2	2.2
S17	Object_surprise	25	male	80	61.5	0	2.25	1.88	11	21	2	11	5.7	5.4	5.5	1	1.9	1	1.4	1	4.6	3.1	4.3	1.5	1.8	1	1.2	1	3.7	2.8	2.2	2.3	1.2	1	2.2	1.4	3.2	3.3	1.3	4.2	1.1	1	3	1.2	2.8	6	2.1	2.2	2.2
S17	Pixel_arousal	25	male	80	61.5	0	2.25	1.88	11	21	2	11	5.7	5.4	5.5	1	1.9	1	1.4	1	4.6	3.1	4.3	1.5	1.8	1	1.2	1	3.7	2.8	2.2	2.3	1.2	1	2.2	1.4	3.2	3.3	1.3	4.2	1.1	1	3	1.2	2.8	6	2.1	2.2	2.2
S17	Pixel_happiness	25	male	80	61.5	0	2.25	1.88	11	21	2	11	5.7	5.4	5.5	1	1.9	1	1.4	1	4.6	3.1	4.3	1.5	1.8	1	1.2	1	3.7	2.8	2.2	2.3	1.2	1	2.2	1.4	3.2	3.3	1.3	4.2	1.1	1	3	1.2	2.8	6	2.1	2.2	2.2
S17	Pixel_disgust	25	male	80	61.5	0	2.25	1.88	11	21	2	11	5.7	5.4	5.5	1	1.9	1	1.4	1	4.6	3.1	4.3	1.5	1.8	1	1.2	1	3.7	2.8	2.2	2.3	1.2	1	2.2	1.4	3.2	3.3	1.3	4.2	1.1	1	3	1.2	2.8	6	2.1	2.2	2.2
S17	Pixel_fear	25	male	80	61.5	0	2.25	1.88	11	21	2	11	5.7	5.4	5.5	1	1.9	1	1.4	1	4.6	3.1	4.3	1.5	1.8	1	1.2	1	3.7	2.8	2.2	2.3	1.2	1	2.2	1.4	3.2	3.3	1.3	4.2	1.1	1	3	1.2	2.8	6	2.1	2.2	2.2
S17	Pixel_sadness	25	male	80	61.5	0	2.25	1.88	11	21	2	11	5.7	5.4	5.5	1	1.9	1	1.4	1	4.6	3.1	4.3	1.5	1.8	1	1.2	1	3.7	2.8	2.2	2.3	1.2	1	2.2	1.4	3.2	3.3	1.3	4.2	1.1	1	3	1.2	2.8	6	2.1	2.2	2.2
S17	Pixel_valence	25	male	80	61.5	0	2.25	1.88	11	21	2	11	5.7	5.4	5.5	1	1.9	1	1.4	1	4.6	3.1	4.3	1.5	1.8	1	1.2	1	3.7	2.8	2.2	2.3	1.2	1	2.2	1.4	3.2	3.3	1.3	4.2	1.1	1	3	1.2	2.8	6	2.1	2.2	2.2
S17	Pixel_anger	25	male	80	61.5	0	2.25	1.88	11	21	2	11	5.7	5.4	5.5	1	1.9	1	1.4	1	4.6	3.1	4.3	1.5	1.8	1	1.2	1	3.7	2.8	2.2	2.3	1.2	1	2.2	1.4	3.2	3.3	1.3	4.2	1.1	1	3	1.2	2.8	6	2.1	2.2	2.2
S17	Pixel_surprise	25	male	80	61.5	0	2.25	1.88	11	21	2	11	5.7	5.4	5.5	1	1.9	1	1.4	1	4.6	3.1	4.3	1.5	1.8	1	1.2	1	3.7	2.8	2.2	2.3	1.2	1	2.2	1.4	3.2	3.3	1.3	4.2	1.1	1	3	1.2	2.8	6	2.1	2.2	2.2
S18	ThreateningDogs_arousal	38	male	70	323	8	2.75	2.88	19	17	22	17	5.8	4.2	5.4	2.2	3	1.2	2.2	1.3	4	3.1	3.6	1.2	2.5	1.2	2.8	2.4	3.8	2.4	2.7	2.8	1.8	1.9	2.9	1.7	4.1	2.5	3.4	1.6	1.6	1.3	1.9	1.9	2.3	5.3	2.2	2.6	3.7
S18	ThreateningDogs_happiness	38	male	70	323	8	2.75	2.88	19	17	22	17	5.8	4.2	5.4	2.2	3	1.2	2.2	1.3	4	3.1	3.6	1.2	2.5	1.2	2.8	2.4	3.8	2.4	2.7	2.8	1.8	1.9	2.9	1.7	4.1	2.5	3.4	1.6	1.6	1.3	1.9	1.9	2.3	5.3	2.2	2.6	3.7
S18	ThreateningDogs_disgust	38	male	70	323	8	2.75	2.88	19	17	22	17	5.8	4.2	5.4	2.2	3	1.2	2.2	1.3	4	3.1	3.6	1.2	2.5	1.2	2.8	2.4	3.8	2.4	2.7	2.8	1.8	1.9	2.9	1.7	4.1	2.5	3.4	1.6	1.6	1.3	1.9	1.9	2.3	5.3	2.2	2.6	3.7
S18	ThreateningDogs_fear	38	male	70	323	8	2.75	2.88	19	17	22	17	5.8	4.2	5.4	2.2	3	1.2	2.2	1.3	4	3.1	3.6	1.2	2.5	1.2	2.8	2.4	3.8	2.4	2.7	2.8	1.8	1.9	2.9	1.7	4.1	2.5	3.4	1.6	1.6	1.3	1.9	1.9	2.3	5.3	2.2	2.6	3.7
S18	ThreateningDogs_sadness	38	male	70	323	8	2.75	2.88	19	17	22	17	5.8	4.2	5.4	2.2	3	1.2	2.2	1.3	4	3.1	3.6	1.2	2.5	1.2	2.8	2.4	3.8	2.4	2.7	2.8	1.8	1.9	2.9	1.7	4.1	2.5	3.4	1.6	1.6	1.3	1.9	1.9	2.3	5.3	2.2	2.6	3.7
S18	ThreateningDogs_valence	38	male	70	323	8	2.75	2.88	19	17	22	17	5.8	4.2	5.4	2.2	3	1.2	2.2	1.3	4	3.1	3.6	1.2	2.5	1.2	2.8	2.4	3.8	2.4	2.7	2.8	1.8	1.9	2.9	1.7	4.1	2.5	3.4	1.6	1.6	1.3	1.9	1.9	2.3	5.3	2.2	2.6	3.7
S18	ThreateningDogs_anger	38	male	70	323	8	2.75	2.88	19	17	22	17	5.8	4.2	5.4	2.2	3	1.2	2.2	1.3	4	3.1	3.6	1.2	2.5	1.2	2.8	2.4	3.8	2.4	2.7	2.8	1.8	1.9	2.9	1.7	4.1	2.5	3.4	1.6	1.6	1.3	1.9	1.9	2.3	5.3	2.2	2.6	3.7
S18	ThreateningDogs_surprise	38	male	70	323	8	2.75	2.88	19	17	22	17	5.8	4.2	5.4	2.2	3	1.2	2.2	1.3	4	3.1	3.6	1.2	2.5	1.2	2.8	2.4	3.8	2.4	2.7	2.8	1.8	1.9	2.9	1.7	4.1	2.5	3.4	1.6	1.6	1.3	1.9	1.9	2.3	5.3	2.2	2.6	3.7
S18	ThreateningHumans_arousal	38	male	70	323	8	2.75	2.88	19	17	22	17	5.8	4.2	5.4	2.2	3	1.2	2.2	1.3	4	3.1	3.6	1.2	2.5	1.2	2.8	2.4	3.8	2.4	2.7	2.8	1.8	1.9	2.9	1.7	4.1	2.5	3.4	1.6	1.6	1.3	1.9	1.9	2.3	5.3	2.2	2.6	3.7
S18	ThreateningHumans_happiness	38	male	70	323	8	2.75	2.88	19	17	22	17	5.8	4.2	5.4	2.2	3	1.2	2.2	1.3	4	3.1	3.6	1.2	2.5	1.2	2.8	2.4	3.8	2.4	2.7	2.8	1.8	1.9	2.9	1.7	4.1	2.5	3.4	1.6	1.6	1.3	1.9	1.9	2.3	5.3	2.2	2.6	3.7
S18	ThreateningHumans_disgust	38	male	70	323	8	2.75	2.88	19	17	22	17	5.8	4.2	5.4	2.2	3	1.2	2.2	1.3	4	3.1	3.6	1.2	2.5	1.2	2.8	2.4	3.8	2.4	2.7	2.8	1.8	1.9	2.9	1.7	4.1	2.5	3.4	1.6	1.6	1.3	1.9	1.9	2.3	5.3	2.2	2.6	3.7
S18	ThreateningHumans_fear	38	male	70	323	8	2.75	2.88	19	17	22	17	5.8	4.2	5.4	2.2	3	1.2	2.2	1.3	4	3.1	3.6	1.2	2.5	1.2	2.8	2.4	3.8	2.4	2.7	2.8	1.8	1.9	2.9	1.7	4.1	2.5	3.4	1.6	1.6	1.3	1.9	1.9	2.3	5.3	2.2	2.6	3.7
S18	ThreateningHumans_sadness	38	male	70	323	8	2.75	2.88	19	17	22	17	5.8	4.2	5.4	2.2	3	1.2	2.2	1.3	4	3.1	3.6	1.2	2.5	1.2	2.8	2.4	3.8	2.4	2.7	2.8	1.8	1.9	2.9	1.7	4.1	2.5	3.4	1.6	1.6	1.3	1.9	1.9	2.3	5.3	2.2	2.6	3.7
S18	ThreateningHumans_valence	38	male	70	323	8	2.75	2.88	19	17	22	17	5.8	4.2	5.4	2.2	3	1.2	2.2	1.3	4	3.1	3.6	1.2	2.5	1.2	2.8	2.4	3.8	2.4	2.7	2.8	1.8	1.9	2.9	1.7	4.1	2.5	3.4	1.6	1.6	1.3	1.9	1.9	2.3	5.3	2.2	2.6	3.7
S18	ThreateningHumans_anger	38	male	70	323	8	2.75	2.88	19	17	22	17	5.8	4.2	5.4	2.2	3	1.2	2.2	1.3	4	3.1	3.6	1.2	2.5	1.2	2.8	2.4	3.8	2.4	2.7	2.8	1.8	1.9	2.9	1.7	4.1	2.5	3.4	1.6	1.6	1.3	1.9	1.9	2.3	5.3	2.2	2.6	3.7
S18	ThreateningHumans_surprise	38	male	70	323	8	2.75	2.88	19	17	22	17	5.8	4.2	5.4	2.2	3	1.2	2.2	1.3	4	3.1	3.6	1.2	2.5	1.2	2.8	2.4	3.8	2.4	2.7	2.8	1.8	1.9	2.9	1.7	4.1	2.5	3.4	1.6	1.6	1.3	1.9	1.9	2.3	5.3	2.2	2.6	3.7
S18	PleasantDogs_arousal	38	male	70	323	8	2.75	2.88	19	17	22	17	5.8	4.2	5.4	2.2	3	1.2	2.2	1.3	4	3.1	3.6	1.2	2.5	1.2	2.8	2.4	3.8	2.4	2.7	2.8	1.8	1.9	2.9	1.7	4.1	2.5	3.4	1.6	1.6	1.3	1.9	1.9	2.3	5.3	2.2	2.6	3.7
S18	PleasantDogs_happiness	38	male	70	323	8	2.75	2.88	19	17	22	17	5.8	4.2	5.4	2.2	3	1.2	2.2	1.3	4	3.1	3.6	1.2	2.5	1.2	2.8	2.4	3.8	2.4	2.7	2.8	1.8	1.9	2.9	1.7	4.1	2.5	3.4	1.6	1.6	1.3	1.9	1.9	2.3	5.3	2.2	2.6	3.7
S18	PleasantDogs_disgust	38	male	70	323	8	2.75	2.88	19	17	22	17	5.8	4.2	5.4	2.2	3	1.2	2.2	1.3	4	3.1	3.6	1.2	2.5	1.2	2.8	2.4	3.8	2.4	2.7	2.8	1.8	1.9	2.9	1.7	4.1	2.5	3.4	1.6	1.6	1.3	1.9	1.9	2.3	5.3	2.2	2.6	3.7
S18	PleasantDogs_fear	38	male	70	323	8	2.75	2.88	19	17	22	17	5.8	4.2	5.4	2.2	3	1.2	2.2	1.3	4	3.1	3.6	1.2	2.5	1.2	2.8	2.4	3.8	2.4	2.7	2.8	1.8	1.9	2.9	1.7	4.1	2.5	3.4	1.6	1.6	1.3	1.9	1.9	2.3	5.3	2.2	2.6	3.7
S18	PleasantDogs_sadness	38	male	70	323	8	2.75	2.88	19	17	22	17	5.8	4.2	5.4	2.2	3	1.2	2.2	1.3	4	3.1	3.6	1.2	2.5	1.2	2.8	2.4	3.8	2.4	2.7	2.8	1.8	1.9	2.9	1.7	4.1	2.5	3.4	1.6	1.6	1.3	1.9	1.9	2.3	5.3	2.2	2.6	3.7
S18	PleasantDogs_valence	38	male	70	323	8	2.75	2.88	19	17	22	17	5.8	4.2	5.4	2.2	3	1.2	2.2	1.3	4	3.1	3.6	1.2	2.5	1.2	2.8	2.4	3.8	2.4	2.7	2.8	1.8	1.9	2.9	1.7	4.1	2.5	3.4	1.6	1.6	1.3	1.9	1.9	2.3	5.3	2.2	2.6	3.7
S18	PleasantDogs_anger	38	male	70	323	8	2.75	2.88	19	17	22	17	5.8	4.2	5.4	2.2	3	1.2	2.2	1.3	4	3.1	3.6	1.2	2.5	1.2	2.8	2.4	3.8	2.4	2.7	2.8	1.8	1.9	2.9	1.7	4.1	2.5	3.4	1.6	1.6	1.3	1.9	1.9	2.3	5.3	2.2	2.6	3.7
S18	PleasantDogs_surprise	38	male	70	323	8	2.75	2.88	19	17	22	17	5.8	4.2	5.4	2.2	3	1.2	2.2	1.3	4	3.1	3.6	1.2	2.5	1.2	2.8	2.4	3.8	2.4	2.7	2.8	1.8	1.9	2.9	1.7	4.1	2.5	3.4	1.6	1.6	1.3	1.9	1.9	2.3	5.3	2.2	2.6	3.7
S18	PleasantHumans_arousal	38	male	70	323	8	2.75	2.88	19	17	22	17	5.8	4.2	5.4	2.2	3	1.2	2.2	1.3	4	3.1	3.6	1.2	2.5	1.2	2.8	2.4	3.8	2.4	2.7	2.8	1.8	1.9	2.9	1.7	4.1	2.5	3.4	1.6	1.6	1.3	1.9	1.9	2.3	5.3	2.2	2.6	3.7
S18	PleasantHumans_happiness	38	male	70	323	8	2.75	2.88	19	17	22	17	5.8	4.2	5.4	2.2	3	1.2	2.2	1.3	4	3.1	3.6	1.2	2.5	1.2	2.8	2.4	3.8	2.4	2.7	2.8	1.8	1.9	2.9	1.7	4.1	2.5	3.4	1.6	1.6	1.3	1.9	1.9	2.3	5.3	2.2	2.6	3.7
S18	PleasantHumans_disgust	38	male	70	323	8	2.75	2.88	19	17	22	17	5.8	4.2	5.4	2.2	3	1.2	2.2	1.3	4	3.1	3.6	1.2	2.5	1.2	2.8	2.4	3.8	2.4	2.7	2.8	1.8	1.9	2.9	1.7	4.1	2.5	3.4	1.6	1.6	1.3	1.9	1.9	2.3	5.3	2.2	2.6	3.7
S18	PleasantHumans_fear	38	male	70	323	8	2.75	2.88	19	17	22	17	5.8	4.2	5.4	2.2	3	1.2	2.2	1.3	4	3.1	3.6	1.2	2.5	1.2	2.8	2.4	3.8	2.4	2.7	2.8	1.8	1.9	2.9	1.7	4.1	2.5	3.4	1.6	1.6	1.3	1.9	1.9	2.3	5.3	2.2	2.6	3.7
S18	PleasantHumans_sadness	38	male	70	323	8	2.75	2.88	19	17	22	17	5.8	4.2	5.4	2.2	3	1.2	2.2	1.3	4	3.1	3.6	1.2	2.5	1.2	2.8	2.4	3.8	2.4	2.7	2.8	1.8	1.9	2.9	1.7	4.1	2.5	3.4	1.6	1.6	1.3	1.9	1.9	2.3	5.3	2.2	2.6	3.7
S18	PleasantHumans_valence	38	male	70	323	8	2.75	2.88	19	17	22	17	5.8	4.2	5.4	2.2	3	1.2	2.2	1.3	4	3.1	3.6	1.2	2.5	1.2	2.8	2.4	3.8	2.4	2.7	2.8	1.8	1.9	2.9	1.7	4.1	2.5	3.4	1.6	1.6	1.3	1.9	1.9	2.3	5.3	2.2	2.6	3.7
S18	PleasantHumans_anger	38	male	70	323	8	2.75	2.88	19	17	22	17	5.8	4.2	5.4	2.2	3	1.2	2.2	1.3	4	3.1	3.6	1.2	2.5	1.2	2.8	2.4	3.8	2.4	2.7	2.8	1.8	1.9	2.9	1.7	4.1	2.5	3.4	1.6	1.6	1.3	1.9	1.9	2.3	5.3	2.2	2.6	3.7
S18	PleasantHumans_surprise	38	male	70	323	8	2.75	2.88	19	17	22	17	5.8	4.2	5.4	2.2	3	1.2	2.2	1.3	4	3.1	3.6	1.2	2.5	1.2	2.8	2.4	3.8	2.4	2.7	2.8	1.8	1.9	2.9	1.7	4.1	2.5	3.4	1.6	1.6	1.3	1.9	1.9	2.3	5.3	2.2	2.6	3.7
S18	NeutralDogs_arousal	38	male	70	323	8	2.75	2.88	19	17	22	17	5.8	4.2	5.4	2.2	3	1.2	2.2	1.3	4	3.1	3.6	1.2	2.5	1.2	2.8	2.4	3.8	2.4	2.7	2.8	1.8	1.9	2.9	1.7	4.1	2.5	3.4	1.6	1.6	1.3	1.9	1.9	2.3	5.3	2.2	2.6	3.7
S18	NeutralDogs_happiness	38	male	70	323	8	2.75	2.88	19	17	22	17	5.8	4.2	5.4	2.2	3	1.2	2.2	1.3	4	3.1	3.6	1.2	2.5	1.2	2.8	2.4	3.8	2.4	2.7	2.8	1.8	1.9	2.9	1.7	4.1	2.5	3.4	1.6	1.6	1.3	1.9	1.9	2.3	5.3	2.2	2.6	3.7
S18	NeutralDogs_disgust	38	male	70	323	8	2.75	2.88	19	17	22	17	5.8	4.2	5.4	2.2	3	1.2	2.2	1.3	4	3.1	3.6	1.2	2.5	1.2	2.8	2.4	3.8	2.4	2.7	2.8	1.8	1.9	2.9	1.7	4.1	2.5	3.4	1.6	1.6	1.3	1.9	1.9	2.3	5.3	2.2	2.6	3.7
S18	NeutralDogs_fear	38	male	70	323	8	2.75	2.88	19	17	22	17	5.8	4.2	5.4	2.2	3	1.2	2.2	1.3	4	3.1	3.6	1.2	2.5	1.2	2.8	2.4	3.8	2.4	2.7	2.8	1.8	1.9	2.9	1.7	4.1	2.5	3.4	1.6	1.6	1.3	1.9	1.9	2.3	5.3	2.2	2.6	3.7
S18	NeutralDogs_sadness	38	male	70	323	8	2.75	2.88	19	17	22	17	5.8	4.2	5.4	2.2	3	1.2	2.2	1.3	4	3.1	3.6	1.2	2.5	1.2	2.8	2.4	3.8	2.4	2.7	2.8	1.8	1.9	2.9	1.7	4.1	2.5	3.4	1.6	1.6	1.3	1.9	1.9	2.3	5.3	2.2	2.6	3.7
S18	NeutralDogs_valence	38	male	70	323	8	2.75	2.88	19	17	22	17	5.8	4.2	5.4	2.2	3	1.2	2.2	1.3	4	3.1	3.6	1.2	2.5	1.2	2.8	2.4	3.8	2.4	2.7	2.8	1.8	1.9	2.9	1.7	4.1	2.5	3.4	1.6	1.6	1.3	1.9	1.9	2.3	5.3	2.2	2.6	3.7
S18	NeutralDogs_anger	38	male	70	323	8	2.75	2.88	19	17	22	17	5.8	4.2	5.4	2.2	3	1.2	2.2	1.3	4	3.1	3.6	1.2	2.5	1.2	2.8	2.4	3.8	2.4	2.7	2.8	1.8	1.9	2.9	1.7	4.1	2.5	3.4	1.6	1.6	1.3	1.9	1.9	2.3	5.3	2.2	2.6	3.7
S18	NeutralDogs_surprise	38	male	70	323	8	2.75	2.88	19	17	22	17	5.8	4.2	5.4	2.2	3	1.2	2.2	1.3	4	3.1	3.6	1.2	2.5	1.2	2.8	2.4	3.8	2.4	2.7	2.8	1.8	1.9	2.9	1.7	4.1	2.5	3.4	1.6	1.6	1.3	1.9	1.9	2.3	5.3	2.2	2.6	3.7
S18	NeutralHumans_arousal	38	male	70	323	8	2.75	2.88	19	17	22	17	5.8	4.2	5.4	2.2	3	1.2	2.2	1.3	4	3.1	3.6	1.2	2.5	1.2	2.8	2.4	3.8	2.4	2.7	2.8	1.8	1.9	2.9	1.7	4.1	2.5	3.4	1.6	1.6	1.3	1.9	1.9	2.3	5.3	2.2	2.6	3.7
S18	NeutralHumans_happiness	38	male	70	323	8	2.75	2.88	19	17	22	17	5.8	4.2	5.4	2.2	3	1.2	2.2	1.3	4	3.1	3.6	1.2	2.5	1.2	2.8	2.4	3.8	2.4	2.7	2.8	1.8	1.9	2.9	1.7	4.1	2.5	3.4	1.6	1.6	1.3	1.9	1.9	2.3	5.3	2.2	2.6	3.7
S18	NeutralHumans_disgust	38	male	70	323	8	2.75	2.88	19	17	22	17	5.8	4.2	5.4	2.2	3	1.2	2.2	1.3	4	3.1	3.6	1.2	2.5	1.2	2.8	2.4	3.8	2.4	2.7	2.8	1.8	1.9	2.9	1.7	4.1	2.5	3.4	1.6	1.6	1.3	1.9	1.9	2.3	5.3	2.2	2.6	3.7
S18	NeutralHumans_fear	38	male	70	323	8	2.75	2.88	19	17	22	17	5.8	4.2	5.4	2.2	3	1.2	2.2	1.3	4	3.1	3.6	1.2	2.5	1.2	2.8	2.4	3.8	2.4	2.7	2.8	1.8	1.9	2.9	1.7	4.1	2.5	3.4	1.6	1.6	1.3	1.9	1.9	2.3	5.3	2.2	2.6	3.7
S18	NeutralHumans_sadness	38	male	70	323	8	2.75	2.88	19	17	22	17	5.8	4.2	5.4	2.2	3	1.2	2.2	1.3	4	3.1	3.6	1.2	2.5	1.2	2.8	2.4	3.8	2.4	2.7	2.8	1.8	1.9	2.9	1.7	4.1	2.5	3.4	1.6	1.6	1.3	1.9	1.9	2.3	5.3	2.2	2.6	3.7
S18	NeutralHumans_valence	38	male	70	323	8	2.75	2.88	19	17	22	17	5.8	4.2	5.4	2.2	3	1.2	2.2	1.3	4	3.1	3.6	1.2	2.5	1.2	2.8	2.4	3.8	2.4	2.7	2.8	1.8	1.9	2.9	1.7	4.1	2.5	3.4	1.6	1.6	1.3	1.9	1.9	2.3	5.3	2.2	2.6	3.7
S18	NeutralHumans_anger	38	male	70	323	8	2.75	2.88	19	17	22	17	5.8	4.2	5.4	2.2	3	1.2	2.2	1.3	4	3.1	3.6	1.2	2.5	1.2	2.8	2.4	3.8	2.4	2.7	2.8	1.8	1.9	2.9	1.7	4.1	2.5	3.4	1.6	1.6	1.3	1.9	1.9	2.3	5.3	2.2	2.6	3.7
S18	NeutralHumans_surprise	38	male	70	323	8	2.75	2.88	19	17	22	17	5.8	4.2	5.4	2.2	3	1.2	2.2	1.3	4	3.1	3.6	1.2	2.5	1.2	2.8	2.4	3.8	2.4	2.7	2.8	1.8	1.9	2.9	1.7	4.1	2.5	3.4	1.6	1.6	1.3	1.9	1.9	2.3	5.3	2.2	2.6	3.7
S18	Object_arousal	38	male	70	323	8	2.75	2.88	19	17	22	17	5.8	4.2	5.4	2.2	3	1.2	2.2	1.3	4	3.1	3.6	1.2	2.5	1.2	2.8	2.4	3.8	2.4	2.7	2.8	1.8	1.9	2.9	1.7	4.1	2.5	3.4	1.6	1.6	1.3	1.9	1.9	2.3	5.3	2.2	2.6	3.7
S18	Object_happiness	38	male	70	323	8	2.75	2.88	19	17	22	17	5.8	4.2	5.4	2.2	3	1.2	2.2	1.3	4	3.1	3.6	1.2	2.5	1.2	2.8	2.4	3.8	2.4	2.7	2.8	1.8	1.9	2.9	1.7	4.1	2.5	3.4	1.6	1.6	1.3	1.9	1.9	2.3	5.3	2.2	2.6	3.7
S18	Object_disgust	38	male	70	323	8	2.75	2.88	19	17	22	17	5.8	4.2	5.4	2.2	3	1.2	2.2	1.3	4	3.1	3.6	1.2	2.5	1.2	2.8	2.4	3.8	2.4	2.7	2.8	1.8	1.9	2.9	1.7	4.1	2.5	3.4	1.6	1.6	1.3	1.9	1.9	2.3	5.3	2.2	2.6	3.7
S18	Object_fear	38	male	70	323	8	2.75	2.88	19	17	22	17	5.8	4.2	5.4	2.2	3	1.2	2.2	1.3	4	3.1	3.6	1.2	2.5	1.2	2.8	2.4	3.8	2.4	2.7	2.8	1.8	1.9	2.9	1.7	4.1	2.5	3.4	1.6	1.6	1.3	1.9	1.9	2.3	5.3	2.2	2.6	3.7
S18	Object_sadness	38	male	70	323	8	2.75	2.88	19	17	22	17	5.8	4.2	5.4	2.2	3	1.2	2.2	1.3	4	3.1	3.6	1.2	2.5	1.2	2.8	2.4	3.8	2.4	2.7	2.8	1.8	1.9	2.9	1.7	4.1	2.5	3.4	1.6	1.6	1.3	1.9	1.9	2.3	5.3	2.2	2.6	3.7
S18	Object_valence	38	male	70	323	8	2.75	2.88	19	17	22	17	5.8	4.2	5.4	2.2	3	1.2	2.2	1.3	4	3.1	3.6	1.2	2.5	1.2	2.8	2.4	3.8	2.4	2.7	2.8	1.8	1.9	2.9	1.7	4.1	2.5	3.4	1.6	1.6	1.3	1.9	1.9	2.3	5.3	2.2	2.6	3.7
S18	Object_anger	38	male	70	323	8	2.75	2.88	19	17	22	17	5.8	4.2	5.4	2.2	3	1.2	2.2	1.3	4	3.1	3.6	1.2	2.5	1.2	2.8	2.4	3.8	2.4	2.7	2.8	1.8	1.9	2.9	1.7	4.1	2.5	3.4	1.6	1.6	1.3	1.9	1.9	2.3	5.3	2.2	2.6	3.7
S18	Object_surprise	38	male	70	323	8	2.75	2.88	19	17	22	17	5.8	4.2	5.4	2.2	3	1.2	2.2	1.3	4	3.1	3.6	1.2	2.5	1.2	2.8	2.4	3.8	2.4	2.7	2.8	1.8	1.9	2.9	1.7	4.1	2.5	3.4	1.6	1.6	1.3	1.9	1.9	2.3	5.3	2.2	2.6	3.7
S18	Pixel_arousal	38	male	70	323	8	2.75	2.88	19	17	22	17	5.8	4.2	5.4	2.2	3	1.2	2.2	1.3	4	3.1	3.6	1.2	2.5	1.2	2.8	2.4	3.8	2.4	2.7	2.8	1.8	1.9	2.9	1.7	4.1	2.5	3.4	1.6	1.6	1.3	1.9	1.9	2.3	5.3	2.2	2.6	3.7
S18	Pixel_happiness	38	male	70	323	8	2.75	2.88	19	17	22	17	5.8	4.2	5.4	2.2	3	1.2	2.2	1.3	4	3.1	3.6	1.2	2.5	1.2	2.8	2.4	3.8	2.4	2.7	2.8	1.8	1.9	2.9	1.7	4.1	2.5	3.4	1.6	1.6	1.3	1.9	1.9	2.3	5.3	2.2	2.6	3.7
S18	Pixel_disgust	38	male	70	323	8	2.75	2.88	19	17	22	17	5.8	4.2	5.4	2.2	3	1.2	2.2	1.3	4	3.1	3.6	1.2	2.5	1.2	2.8	2.4	3.8	2.4	2.7	2.8	1.8	1.9	2.9	1.7	4.1	2.5	3.4	1.6	1.6	1.3	1.9	1.9	2.3	5.3	2.2	2.6	3.7
S18	Pixel_fear	38	male	70	323	8	2.75	2.88	19	17	22	17	5.8	4.2	5.4	2.2	3	1.2	2.2	1.3	4	3.1	3.6	1.2	2.5	1.2	2.8	2.4	3.8	2.4	2.7	2.8	1.8	1.9	2.9	1.7	4.1	2.5	3.4	1.6	1.6	1.3	1.9	1.9	2.3	5.3	2.2	2.6	3.7
S18	Pixel_sadness	38	male	70	323	8	2.75	2.88	19	17	22	17	5.8	4.2	5.4	2.2	3	1.2	2.2	1.3	4	3.1	3.6	1.2	2.5	1.2	2.8	2.4	3.8	2.4	2.7	2.8	1.8	1.9	2.9	1.7	4.1	2.5	3.4	1.6	1.6	1.3	1.9	1.9	2.3	5.3	2.2	2.6	3.7
S18	Pixel_valence	38	male	70	323	8	2.75	2.88	19	17	22	17	5.8	4.2	5.4	2.2	3	1.2	2.2	1.3	4	3.1	3.6	1.2	2.5	1.2	2.8	2.4	3.8	2.4	2.7	2.8	1.8	1.9	2.9	1.7	4.1	2.5	3.4	1.6	1.6	1.3	1.9	1.9	2.3	5.3	2.2	2.6	3.7
S18	Pixel_anger	38	male	70	323	8	2.75	2.88	19	17	22	17	5.8	4.2	5.4	2.2	3	1.2	2.2	1.3	4	3.1	3.6	1.2	2.5	1.2	2.8	2.4	3.8	2.4	2.7	2.8	1.8	1.9	2.9	1.7	4.1	2.5	3.4	1.6	1.6	1.3	1.9	1.9	2.3	5.3	2.2	2.6	3.7
S18	Pixel_surprise	38	male	70	323	8	2.75	2.88	19	17	22	17	5.8	4.2	5.4	2.2	3	1.2	2.2	1.3	4	3.1	3.6	1.2	2.5	1.2	2.8	2.4	3.8	2.4	2.7	2.8	1.8	1.9	2.9	1.7	4.1	2.5	3.4	1.6	1.6	1.3	1.9	1.9	2.3	5.3	2.2	2.6	3.7
S19	ThreateningDogs_arousal	29	female	80	368	10	3.63	2.38	23	20	28	13	5.5	4.6	5.6	1.7	2.9	1	1.1	1.1	5.4	3.5	4.3	1.5	2.4	1	1	1.1	3.2	2.3	1.9	3	1.1	1.2	2	2.2	3.6	2.8	1.5	2.2	1	1.2	1.6	1.9	2.8	5.4	2.1	1.6	4.2
S19	ThreateningDogs_happiness	29	female	80	368	10	3.63	2.38	23	20	28	13	5.5	4.6	5.6	1.7	2.9	1	1.1	1.1	5.4	3.5	4.3	1.5	2.4	1	1	1.1	3.2	2.3	1.9	3	1.1	1.2	2	2.2	3.6	2.8	1.5	2.2	1	1.2	1.6	1.9	2.8	5.4	2.1	1.6	4.2
S19	ThreateningDogs_disgust	29	female	80	368	10	3.63	2.38	23	20	28	13	5.5	4.6	5.6	1.7	2.9	1	1.1	1.1	5.4	3.5	4.3	1.5	2.4	1	1	1.1	3.2	2.3	1.9	3	1.1	1.2	2	2.2	3.6	2.8	1.5	2.2	1	1.2	1.6	1.9	2.8	5.4	2.1	1.6	4.2
S19	ThreateningDogs_fear	29	female	80	368	10	3.63	2.38	23	20	28	13	5.5	4.6	5.6	1.7	2.9	1	1.1	1.1	5.4	3.5	4.3	1.5	2.4	1	1	1.1	3.2	2.3	1.9	3	1.1	1.2	2	2.2	3.6	2.8	1.5	2.2	1	1.2	1.6	1.9	2.8	5.4	2.1	1.6	4.2
S19	ThreateningDogs_sadness	29	female	80	368	10	3.63	2.38	23	20	28	13	5.5	4.6	5.6	1.7	2.9	1	1.1	1.1	5.4	3.5	4.3	1.5	2.4	1	1	1.1	3.2	2.3	1.9	3	1.1	1.2	2	2.2	3.6	2.8	1.5	2.2	1	1.2	1.6	1.9	2.8	5.4	2.1	1.6	4.2
S19	ThreateningDogs_valence	29	female	80	368	10	3.63	2.38	23	20	28	13	5.5	4.6	5.6	1.7	2.9	1	1.1	1.1	5.4	3.5	4.3	1.5	2.4	1	1	1.1	3.2	2.3	1.9	3	1.1	1.2	2	2.2	3.6	2.8	1.5	2.2	1	1.2	1.6	1.9	2.8	5.4	2.1	1.6	4.2
S19	ThreateningDogs_anger	29	female	80	368	10	3.63	2.38	23	20	28	13	5.5	4.6	5.6	1.7	2.9	1	1.1	1.1	5.4	3.5	4.3	1.5	2.4	1	1	1.1	3.2	2.3	1.9	3	1.1	1.2	2	2.2	3.6	2.8	1.5	2.2	1	1.2	1.6	1.9	2.8	5.4	2.1	1.6	4.2
S19	ThreateningDogs_surprise	29	female	80	368	10	3.63	2.38	23	20	28	13	5.5	4.6	5.6	1.7	2.9	1	1.1	1.1	5.4	3.5	4.3	1.5	2.4	1	1	1.1	3.2	2.3	1.9	3	1.1	1.2	2	2.2	3.6	2.8	1.5	2.2	1	1.2	1.6	1.9	2.8	5.4	2.1	1.6	4.2
S19	ThreateningHumans_arousal	29	female	80	368	10	3.63	2.38	23	20	28	13	5.5	4.6	5.6	1.7	2.9	1	1.1	1.1	5.4	3.5	4.3	1.5	2.4	1	1	1.1	3.2	2.3	1.9	3	1.1	1.2	2	2.2	3.6	2.8	1.5	2.2	1	1.2	1.6	1.9	2.8	5.4	2.1	1.6	4.2
S19	ThreateningHumans_happiness	29	female	80	368	10	3.63	2.38	23	20	28	13	5.5	4.6	5.6	1.7	2.9	1	1.1	1.1	5.4	3.5	4.3	1.5	2.4	1	1	1.1	3.2	2.3	1.9	3	1.1	1.2	2	2.2	3.6	2.8	1.5	2.2	1	1.2	1.6	1.9	2.8	5.4	2.1	1.6	4.2
S19	ThreateningHumans_disgust	29	female	80	368	10	3.63	2.38	23	20	28	13	5.5	4.6	5.6	1.7	2.9	1	1.1	1.1	5.4	3.5	4.3	1.5	2.4	1	1	1.1	3.2	2.3	1.9	3	1.1	1.2	2	2.2	3.6	2.8	1.5	2.2	1	1.2	1.6	1.9	2.8	5.4	2.1	1.6	4.2
S19	ThreateningHumans_fear	29	female	80	368	10	3.63	2.38	23	20	28	13	5.5	4.6	5.6	1.7	2.9	1	1.1	1.1	5.4	3.5	4.3	1.5	2.4	1	1	1.1	3.2	2.3	1.9	3	1.1	1.2	2	2.2	3.6	2.8	1.5	2.2	1	1.2	1.6	1.9	2.8	5.4	2.1	1.6	4.2
S19	ThreateningHumans_sadness	29	female	80	368	10	3.63	2.38	23	20	28	13	5.5	4.6	5.6	1.7	2.9	1	1.1	1.1	5.4	3.5	4.3	1.5	2.4	1	1	1.1	3.2	2.3	1.9	3	1.1	1.2	2	2.2	3.6	2.8	1.5	2.2	1	1.2	1.6	1.9	2.8	5.4	2.1	1.6	4.2
S19	ThreateningHumans_valence	29	female	80	368	10	3.63	2.38	23	20	28	13	5.5	4.6	5.6	1.7	2.9	1	1.1	1.1	5.4	3.5	4.3	1.5	2.4	1	1	1.1	3.2	2.3	1.9	3	1.1	1.2	2	2.2	3.6	2.8	1.5	2.2	1	1.2	1.6	1.9	2.8	5.4	2.1	1.6	4.2
S19	ThreateningHumans_anger	29	female	80	368	10	3.63	2.38	23	20	28	13	5.5	4.6	5.6	1.7	2.9	1	1.1	1.1	5.4	3.5	4.3	1.5	2.4	1	1	1.1	3.2	2.3	1.9	3	1.1	1.2	2	2.2	3.6	2.8	1.5	2.2	1	1.2	1.6	1.9	2.8	5.4	2.1	1.6	4.2
S19	ThreateningHumans_surprise	29	female	80	368	10	3.63	2.38	23	20	28	13	5.5	4.6	5.6	1.7	2.9	1	1.1	1.1	5.4	3.5	4.3	1.5	2.4	1	1	1.1	3.2	2.3	1.9	3	1.1	1.2	2	2.2	3.6	2.8	1.5	2.2	1	1.2	1.6	1.9	2.8	5.4	2.1	1.6	4.2
S19	PleasantDogs_arousal	29	female	80	368	10	3.63	2.38	23	20	28	13	5.5	4.6	5.6	1.7	2.9	1	1.1	1.1	5.4	3.5	4.3	1.5	2.4	1	1	1.1	3.2	2.3	1.9	3	1.1	1.2	2	2.2	3.6	2.8	1.5	2.2	1	1.2	1.6	1.9	2.8	5.4	2.1	1.6	4.2
S19	PleasantDogs_happiness	29	female	80	368	10	3.63	2.38	23	20	28	13	5.5	4.6	5.6	1.7	2.9	1	1.1	1.1	5.4	3.5	4.3	1.5	2.4	1	1	1.1	3.2	2.3	1.9	3	1.1	1.2	2	2.2	3.6	2.8	1.5	2.2	1	1.2	1.6	1.9	2.8	5.4	2.1	1.6	4.2
S19	PleasantDogs_disgust	29	female	80	368	10	3.63	2.38	23	20	28	13	5.5	4.6	5.6	1.7	2.9	1	1.1	1.1	5.4	3.5	4.3	1.5	2.4	1	1	1.1	3.2	2.3	1.9	3	1.1	1.2	2	2.2	3.6	2.8	1.5	2.2	1	1.2	1.6	1.9	2.8	5.4	2.1	1.6	4.2
S19	PleasantDogs_fear	29	female	80	368	10	3.63	2.38	23	20	28	13	5.5	4.6	5.6	1.7	2.9	1	1.1	1.1	5.4	3.5	4.3	1.5	2.4	1	1	1.1	3.2	2.3	1.9	3	1.1	1.2	2	2.2	3.6	2.8	1.5	2.2	1	1.2	1.6	1.9	2.8	5.4	2.1	1.6	4.2
S19	PleasantDogs_sadness	29	female	80	368	10	3.63	2.38	23	20	28	13	5.5	4.6	5.6	1.7	2.9	1	1.1	1.1	5.4	3.5	4.3	1.5	2.4	1	1	1.1	3.2	2.3	1.9	3	1.1	1.2	2	2.2	3.6	2.8	1.5	2.2	1	1.2	1.6	1.9	2.8	5.4	2.1	1.6	4.2
S19	PleasantDogs_valence	29	female	80	368	10	3.63	2.38	23	20	28	13	5.5	4.6	5.6	1.7	2.9	1	1.1	1.1	5.4	3.5	4.3	1.5	2.4	1	1	1.1	3.2	2.3	1.9	3	1.1	1.2	2	2.2	3.6	2.8	1.5	2.2	1	1.2	1.6	1.9	2.8	5.4	2.1	1.6	4.2
S19	PleasantDogs_anger	29	female	80	368	10	3.63	2.38	23	20	28	13	5.5	4.6	5.6	1.7	2.9	1	1.1	1.1	5.4	3.5	4.3	1.5	2.4	1	1	1.1	3.2	2.3	1.9	3	1.1	1.2	2	2.2	3.6	2.8	1.5	2.2	1	1.2	1.6	1.9	2.8	5.4	2.1	1.6	4.2
S19	PleasantDogs_surprise	29	female	80	368	10	3.63	2.38	23	20	28	13	5.5	4.6	5.6	1.7	2.9	1	1.1	1.1	5.4	3.5	4.3	1.5	2.4	1	1	1.1	3.2	2.3	1.9	3	1.1	1.2	2	2.2	3.6	2.8	1.5	2.2	1	1.2	1.6	1.9	2.8	5.4	2.1	1.6	4.2
S19	PleasantHumans_arousal	29	female	80	368	10	3.63	2.38	23	20	28	13	5.5	4.6	5.6	1.7	2.9	1	1.1	1.1	5.4	3.5	4.3	1.5	2.4	1	1	1.1	3.2	2.3	1.9	3	1.1	1.2	2	2.2	3.6	2.8	1.5	2.2	1	1.2	1.6	1.9	2.8	5.4	2.1	1.6	4.2
S19	PleasantHumans_happiness	29	female	80	368	10	3.63	2.38	23	20	28	13	5.5	4.6	5.6	1.7	2.9	1	1.1	1.1	5.4	3.5	4.3	1.5	2.4	1	1	1.1	3.2	2.3	1.9	3	1.1	1.2	2	2.2	3.6	2.8	1.5	2.2	1	1.2	1.6	1.9	2.8	5.4	2.1	1.6	4.2
S19	PleasantHumans_disgust	29	female	80	368	10	3.63	2.38	23	20	28	13	5.5	4.6	5.6	1.7	2.9	1	1.1	1.1	5.4	3.5	4.3	1.5	2.4	1	1	1.1	3.2	2.3	1.9	3	1.1	1.2	2	2.2	3.6	2.8	1.5	2.2	1	1.2	1.6	1.9	2.8	5.4	2.1	1.6	4.2
S19	PleasantHumans_fear	29	female	80	368	10	3.63	2.38	23	20	28	13	5.5	4.6	5.6	1.7	2.9	1	1.1	1.1	5.4	3.5	4.3	1.5	2.4	1	1	1.1	3.2	2.3	1.9	3	1.1	1.2	2	2.2	3.6	2.8	1.5	2.2	1	1.2	1.6	1.9	2.8	5.4	2.1	1.6	4.2
S19	PleasantHumans_sadness	29	female	80	368	10	3.63	2.38	23	20	28	13	5.5	4.6	5.6	1.7	2.9	1	1.1	1.1	5.4	3.5	4.3	1.5	2.4	1	1	1.1	3.2	2.3	1.9	3	1.1	1.2	2	2.2	3.6	2.8	1.5	2.2	1	1.2	1.6	1.9	2.8	5.4	2.1	1.6	4.2
S19	PleasantHumans_valence	29	female	80	368	10	3.63	2.38	23	20	28	13	5.5	4.6	5.6	1.7	2.9	1	1.1	1.1	5.4	3.5	4.3	1.5	2.4	1	1	1.1	3.2	2.3	1.9	3	1.1	1.2	2	2.2	3.6	2.8	1.5	2.2	1	1.2	1.6	1.9	2.8	5.4	2.1	1.6	4.2
S19	PleasantHumans_anger	29	female	80	368	10	3.63	2.38	23	20	28	13	5.5	4.6	5.6	1.7	2.9	1	1.1	1.1	5.4	3.5	4.3	1.5	2.4	1	1	1.1	3.2	2.3	1.9	3	1.1	1.2	2	2.2	3.6	2.8	1.5	2.2	1	1.2	1.6	1.9	2.8	5.4	2.1	1.6	4.2
S19	PleasantHumans_surprise	29	female	80	368	10	3.63	2.38	23	20	28	13	5.5	4.6	5.6	1.7	2.9	1	1.1	1.1	5.4	3.5	4.3	1.5	2.4	1	1	1.1	3.2	2.3	1.9	3	1.1	1.2	2	2.2	3.6	2.8	1.5	2.2	1	1.2	1.6	1.9	2.8	5.4	2.1	1.6	4.2
S19	NeutralDogs_arousal	29	female	80	368	10	3.63	2.38	23	20	28	13	5.5	4.6	5.6	1.7	2.9	1	1.1	1.1	5.4	3.5	4.3	1.5	2.4	1	1	1.1	3.2	2.3	1.9	3	1.1	1.2	2	2.2	3.6	2.8	1.5	2.2	1	1.2	1.6	1.9	2.8	5.4	2.1	1.6	4.2
S19	NeutralDogs_happiness	29	female	80	368	10	3.63	2.38	23	20	28	13	5.5	4.6	5.6	1.7	2.9	1	1.1	1.1	5.4	3.5	4.3	1.5	2.4	1	1	1.1	3.2	2.3	1.9	3	1.1	1.2	2	2.2	3.6	2.8	1.5	2.2	1	1.2	1.6	1.9	2.8	5.4	2.1	1.6	4.2
S19	NeutralDogs_disgust	29	female	80	368	10	3.63	2.38	23	20	28	13	5.5	4.6	5.6	1.7	2.9	1	1.1	1.1	5.4	3.5	4.3	1.5	2.4	1	1	1.1	3.2	2.3	1.9	3	1.1	1.2	2	2.2	3.6	2.8	1.5	2.2	1	1.2	1.6	1.9	2.8	5.4	2.1	1.6	4.2
S19	NeutralDogs_fear	29	female	80	368	10	3.63	2.38	23	20	28	13	5.5	4.6	5.6	1.7	2.9	1	1.1	1.1	5.4	3.5	4.3	1.5	2.4	1	1	1.1	3.2	2.3	1.9	3	1.1	1.2	2	2.2	3.6	2.8	1.5	2.2	1	1.2	1.6	1.9	2.8	5.4	2.1	1.6	4.2
S19	NeutralDogs_sadness	29	female	80	368	10	3.63	2.38	23	20	28	13	5.5	4.6	5.6	1.7	2.9	1	1.1	1.1	5.4	3.5	4.3	1.5	2.4	1	1	1.1	3.2	2.3	1.9	3	1.1	1.2	2	2.2	3.6	2.8	1.5	2.2	1	1.2	1.6	1.9	2.8	5.4	2.1	1.6	4.2
S19	NeutralDogs_valence	29	female	80	368	10	3.63	2.38	23	20	28	13	5.5	4.6	5.6	1.7	2.9	1	1.1	1.1	5.4	3.5	4.3	1.5	2.4	1	1	1.1	3.2	2.3	1.9	3	1.1	1.2	2	2.2	3.6	2.8	1.5	2.2	1	1.2	1.6	1.9	2.8	5.4	2.1	1.6	4.2
S19	NeutralDogs_anger	29	female	80	368	10	3.63	2.38	23	20	28	13	5.5	4.6	5.6	1.7	2.9	1	1.1	1.1	5.4	3.5	4.3	1.5	2.4	1	1	1.1	3.2	2.3	1.9	3	1.1	1.2	2	2.2	3.6	2.8	1.5	2.2	1	1.2	1.6	1.9	2.8	5.4	2.1	1.6	4.2
S19	NeutralDogs_surprise	29	female	80	368	10	3.63	2.38	23	20	28	13	5.5	4.6	5.6	1.7	2.9	1	1.1	1.1	5.4	3.5	4.3	1.5	2.4	1	1	1.1	3.2	2.3	1.9	3	1.1	1.2	2	2.2	3.6	2.8	1.5	2.2	1	1.2	1.6	1.9	2.8	5.4	2.1	1.6	4.2
S19	NeutralHumans_arousal	29	female	80	368	10	3.63	2.38	23	20	28	13	5.5	4.6	5.6	1.7	2.9	1	1.1	1.1	5.4	3.5	4.3	1.5	2.4	1	1	1.1	3.2	2.3	1.9	3	1.1	1.2	2	2.2	3.6	2.8	1.5	2.2	1	1.2	1.6	1.9	2.8	5.4	2.1	1.6	4.2
S19	NeutralHumans_happiness	29	female	80	368	10	3.63	2.38	23	20	28	13	5.5	4.6	5.6	1.7	2.9	1	1.1	1.1	5.4	3.5	4.3	1.5	2.4	1	1	1.1	3.2	2.3	1.9	3	1.1	1.2	2	2.2	3.6	2.8	1.5	2.2	1	1.2	1.6	1.9	2.8	5.4	2.1	1.6	4.2
S19	NeutralHumans_disgust	29	female	80	368	10	3.63	2.38	23	20	28	13	5.5	4.6	5.6	1.7	2.9	1	1.1	1.1	5.4	3.5	4.3	1.5	2.4	1	1	1.1	3.2	2.3	1.9	3	1.1	1.2	2	2.2	3.6	2.8	1.5	2.2	1	1.2	1.6	1.9	2.8	5.4	2.1	1.6	4.2
S19	NeutralHumans_fear	29	female	80	368	10	3.63	2.38	23	20	28	13	5.5	4.6	5.6	1.7	2.9	1	1.1	1.1	5.4	3.5	4.3	1.5	2.4	1	1	1.1	3.2	2.3	1.9	3	1.1	1.2	2	2.2	3.6	2.8	1.5	2.2	1	1.2	1.6	1.9	2.8	5.4	2.1	1.6	4.2
S19	NeutralHumans_sadness	29	female	80	368	10	3.63	2.38	23	20	28	13	5.5	4.6	5.6	1.7	2.9	1	1.1	1.1	5.4	3.5	4.3	1.5	2.4	1	1	1.1	3.2	2.3	1.9	3	1.1	1.2	2	2.2	3.6	2.8	1.5	2.2	1	1.2	1.6	1.9	2.8	5.4	2.1	1.6	4.2
S19	NeutralHumans_valence	29	female	80	368	10	3.63	2.38	23	20	28	13	5.5	4.6	5.6	1.7	2.9	1	1.1	1.1	5.4	3.5	4.3	1.5	2.4	1	1	1.1	3.2	2.3	1.9	3	1.1	1.2	2	2.2	3.6	2.8	1.5	2.2	1	1.2	1.6	1.9	2.8	5.4	2.1	1.6	4.2
S19	NeutralHumans_anger	29	female	80	368	10	3.63	2.38	23	20	28	13	5.5	4.6	5.6	1.7	2.9	1	1.1	1.1	5.4	3.5	4.3	1.5	2.4	1	1	1.1	3.2	2.3	1.9	3	1.1	1.2	2	2.2	3.6	2.8	1.5	2.2	1	1.2	1.6	1.9	2.8	5.4	2.1	1.6	4.2
S19	NeutralHumans_surprise	29	female	80	368	10	3.63	2.38	23	20	28	13	5.5	4.6	5.6	1.7	2.9	1	1.1	1.1	5.4	3.5	4.3	1.5	2.4	1	1	1.1	3.2	2.3	1.9	3	1.1	1.2	2	2.2	3.6	2.8	1.5	2.2	1	1.2	1.6	1.9	2.8	5.4	2.1	1.6	4.2
S19	Object_arousal	29	female	80	368	10	3.63	2.38	23	20	28	13	5.5	4.6	5.6	1.7	2.9	1	1.1	1.1	5.4	3.5	4.3	1.5	2.4	1	1	1.1	3.2	2.3	1.9	3	1.1	1.2	2	2.2	3.6	2.8	1.5	2.2	1	1.2	1.6	1.9	2.8	5.4	2.1	1.6	4.2
S19	Object_happiness	29	female	80	368	10	3.63	2.38	23	20	28	13	5.5	4.6	5.6	1.7	2.9	1	1.1	1.1	5.4	3.5	4.3	1.5	2.4	1	1	1.1	3.2	2.3	1.9	3	1.1	1.2	2	2.2	3.6	2.8	1.5	2.2	1	1.2	1.6	1.9	2.8	5.4	2.1	1.6	4.2
S19	Object_disgust	29	female	80	368	10	3.63	2.38	23	20	28	13	5.5	4.6	5.6	1.7	2.9	1	1.1	1.1	5.4	3.5	4.3	1.5	2.4	1	1	1.1	3.2	2.3	1.9	3	1.1	1.2	2	2.2	3.6	2.8	1.5	2.2	1	1.2	1.6	1.9	2.8	5.4	2.1	1.6	4.2
S19	Object_fear	29	female	80	368	10	3.63	2.38	23	20	28	13	5.5	4.6	5.6	1.7	2.9	1	1.1	1.1	5.4	3.5	4.3	1.5	2.4	1	1	1.1	3.2	2.3	1.9	3	1.1	1.2	2	2.2	3.6	2.8	1.5	2.2	1	1.2	1.6	1.9	2.8	5.4	2.1	1.6	4.2
S19	Object_sadness	29	female	80	368	10	3.63	2.38	23	20	28	13	5.5	4.6	5.6	1.7	2.9	1	1.1	1.1	5.4	3.5	4.3	1.5	2.4	1	1	1.1	3.2	2.3	1.9	3	1.1	1.2	2	2.2	3.6	2.8	1.5	2.2	1	1.2	1.6	1.9	2.8	5.4	2.1	1.6	4.2
S19	Object_valence	29	female	80	368	10	3.63	2.38	23	20	28	13	5.5	4.6	5.6	1.7	2.9	1	1.1	1.1	5.4	3.5	4.3	1.5	2.4	1	1	1.1	3.2	2.3	1.9	3	1.1	1.2	2	2.2	3.6	2.8	1.5	2.2	1	1.2	1.6	1.9	2.8	5.4	2.1	1.6	4.2
S19	Object_anger	29	female	80	368	10	3.63	2.38	23	20	28	13	5.5	4.6	5.6	1.7	2.9	1	1.1	1.1	5.4	3.5	4.3	1.5	2.4	1	1	1.1	3.2	2.3	1.9	3	1.1	1.2	2	2.2	3.6	2.8	1.5	2.2	1	1.2	1.6	1.9	2.8	5.4	2.1	1.6	4.2
S19	Object_surprise	29	female	80	368	10	3.63	2.38	23	20	28	13	5.5	4.6	5.6	1.7	2.9	1	1.1	1.1	5.4	3.5	4.3	1.5	2.4	1	1	1.1	3.2	2.3	1.9	3	1.1	1.2	2	2.2	3.6	2.8	1.5	2.2	1	1.2	1.6	1.9	2.8	5.4	2.1	1.6	4.2
S19	Pixel_arousal	29	female	80	368	10	3.63	2.38	23	20	28	13	5.5	4.6	5.6	1.7	2.9	1	1.1	1.1	5.4	3.5	4.3	1.5	2.4	1	1	1.1	3.2	2.3	1.9	3	1.1	1.2	2	2.2	3.6	2.8	1.5	2.2	1	1.2	1.6	1.9	2.8	5.4	2.1	1.6	4.2
S19	Pixel_happiness	29	female	80	368	10	3.63	2.38	23	20	28	13	5.5	4.6	5.6	1.7	2.9	1	1.1	1.1	5.4	3.5	4.3	1.5	2.4	1	1	1.1	3.2	2.3	1.9	3	1.1	1.2	2	2.2	3.6	2.8	1.5	2.2	1	1.2	1.6	1.9	2.8	5.4	2.1	1.6	4.2
S19	Pixel_disgust	29	female	80	368	10	3.63	2.38	23	20	28	13	5.5	4.6	5.6	1.7	2.9	1	1.1	1.1	5.4	3.5	4.3	1.5	2.4	1	1	1.1	3.2	2.3	1.9	3	1.1	1.2	2	2.2	3.6	2.8	1.5	2.2	1	1.2	1.6	1.9	2.8	5.4	2.1	1.6	4.2
S19	Pixel_fear	29	female	80	368	10	3.63	2.38	23	20	28	13	5.5	4.6	5.6	1.7	2.9	1	1.1	1.1	5.4	3.5	4.3	1.5	2.4	1	1	1.1	3.2	2.3	1.9	3	1.1	1.2	2	2.2	3.6	2.8	1.5	2.2	1	1.2	1.6	1.9	2.8	5.4	2.1	1.6	4.2
S19	Pixel_sadness	29	female	80	368	10	3.63	2.38	23	20	28	13	5.5	4.6	5.6	1.7	2.9	1	1.1	1.1	5.4	3.5	4.3	1.5	2.4	1	1	1.1	3.2	2.3	1.9	3	1.1	1.2	2	2.2	3.6	2.8	1.5	2.2	1	1.2	1.6	1.9	2.8	5.4	2.1	1.6	4.2
S19	Pixel_valence	29	female	80	368	10	3.63	2.38	23	20	28	13	5.5	4.6	5.6	1.7	2.9	1	1.1	1.1	5.4	3.5	4.3	1.5	2.4	1	1	1.1	3.2	2.3	1.9	3	1.1	1.2	2	2.2	3.6	2.8	1.5	2.2	1	1.2	1.6	1.9	2.8	5.4	2.1	1.6	4.2
S19	Pixel_anger	29	female	80	368	10	3.63	2.38	23	20	28	13	5.5	4.6	5.6	1.7	2.9	1	1.1	1.1	5.4	3.5	4.3	1.5	2.4	1	1	1.1	3.2	2.3	1.9	3	1.1	1.2	2	2.2	3.6	2.8	1.5	2.2	1	1.2	1.6	1.9	2.8	5.4	2.1	1.6	4.2
S19	Pixel_surprise	29	female	80	368	10	3.63	2.38	23	20	28	13	5.5	4.6	5.6	1.7	2.9	1	1.1	1.1	5.4	3.5	4.3	1.5	2.4	1	1	1.1	3.2	2.3	1.9	3	1.1	1.2	2	2.2	3.6	2.8	1.5	2.2	1	1.2	1.6	1.9	2.8	5.4	2.1	1.6	4.2
S20	ThreateningDogs_arousal	46	female	100	355.5	8	3.13	2.88	20	18	21	21	5.2	4.5	5	1	3.6	1	1	1	5.2	3.3	4	1	2.6	1	1	1	3.6	3	1.4	2.6	2.2	2.1	2	1.8	3.9	3	1.5	1.4	2.5	1	1.6	1.4	2.9	4.9	1.4	1.8	4.2
S20	ThreateningDogs_happiness	46	female	100	355.5	8	3.13	2.88	20	18	21	21	5.2	4.5	5	1	3.6	1	1	1	5.2	3.3	4	1	2.6	1	1	1	3.6	3	1.4	2.6	2.2	2.1	2	1.8	3.9	3	1.5	1.4	2.5	1	1.6	1.4	2.9	4.9	1.4	1.8	4.2
S20	ThreateningDogs_disgust	46	female	100	355.5	8	3.13	2.88	20	18	21	21	5.2	4.5	5	1	3.6	1	1	1	5.2	3.3	4	1	2.6	1	1	1	3.6	3	1.4	2.6	2.2	2.1	2	1.8	3.9	3	1.5	1.4	2.5	1	1.6	1.4	2.9	4.9	1.4	1.8	4.2
S20	ThreateningDogs_fear	46	female	100	355.5	8	3.13	2.88	20	18	21	21	5.2	4.5	5	1	3.6	1	1	1	5.2	3.3	4	1	2.6	1	1	1	3.6	3	1.4	2.6	2.2	2.1	2	1.8	3.9	3	1.5	1.4	2.5	1	1.6	1.4	2.9	4.9	1.4	1.8	4.2
S20	ThreateningDogs_sadness	46	female	100	355.5	8	3.13	2.88	20	18	21	21	5.2	4.5	5	1	3.6	1	1	1	5.2	3.3	4	1	2.6	1	1	1	3.6	3	1.4	2.6	2.2	2.1	2	1.8	3.9	3	1.5	1.4	2.5	1	1.6	1.4	2.9	4.9	1.4	1.8	4.2
S20	ThreateningDogs_valence	46	female	100	355.5	8	3.13	2.88	20	18	21	21	5.2	4.5	5	1	3.6	1	1	1	5.2	3.3	4	1	2.6	1	1	1	3.6	3	1.4	2.6	2.2	2.1	2	1.8	3.9	3	1.5	1.4	2.5	1	1.6	1.4	2.9	4.9	1.4	1.8	4.2
S20	ThreateningDogs_anger	46	female	100	355.5	8	3.13	2.88	20	18	21	21	5.2	4.5	5	1	3.6	1	1	1	5.2	3.3	4	1	2.6	1	1	1	3.6	3	1.4	2.6	2.2	2.1	2	1.8	3.9	3	1.5	1.4	2.5	1	1.6	1.4	2.9	4.9	1.4	1.8	4.2
S20	ThreateningDogs_surprise	46	female	100	355.5	8	3.13	2.88	20	18	21	21	5.2	4.5	5	1	3.6	1	1	1	5.2	3.3	4	1	2.6	1	1	1	3.6	3	1.4	2.6	2.2	2.1	2	1.8	3.9	3	1.5	1.4	2.5	1	1.6	1.4	2.9	4.9	1.4	1.8	4.2
S20	ThreateningHumans_arousal	46	female	100	355.5	8	3.13	2.88	20	18	21	21	5.2	4.5	5	1	3.6	1	1	1	5.2	3.3	4	1	2.6	1	1	1	3.6	3	1.4	2.6	2.2	2.1	2	1.8	3.9	3	1.5	1.4	2.5	1	1.6	1.4	2.9	4.9	1.4	1.8	4.2
S20	ThreateningHumans_happiness	46	female	100	355.5	8	3.13	2.88	20	18	21	21	5.2	4.5	5	1	3.6	1	1	1	5.2	3.3	4	1	2.6	1	1	1	3.6	3	1.4	2.6	2.2	2.1	2	1.8	3.9	3	1.5	1.4	2.5	1	1.6	1.4	2.9	4.9	1.4	1.8	4.2
S20	ThreateningHumans_disgust	46	female	100	355.5	8	3.13	2.88	20	18	21	21	5.2	4.5	5	1	3.6	1	1	1	5.2	3.3	4	1	2.6	1	1	1	3.6	3	1.4	2.6	2.2	2.1	2	1.8	3.9	3	1.5	1.4	2.5	1	1.6	1.4	2.9	4.9	1.4	1.8	4.2
S20	ThreateningHumans_fear	46	female	100	355.5	8	3.13	2.88	20	18	21	21	5.2	4.5	5	1	3.6	1	1	1	5.2	3.3	4	1	2.6	1	1	1	3.6	3	1.4	2.6	2.2	2.1	2	1.8	3.9	3	1.5	1.4	2.5	1	1.6	1.4	2.9	4.9	1.4	1.8	4.2
S20	ThreateningHumans_sadness	46	female	100	355.5	8	3.13	2.88	20	18	21	21	5.2	4.5	5	1	3.6	1	1	1	5.2	3.3	4	1	2.6	1	1	1	3.6	3	1.4	2.6	2.2	2.1	2	1.8	3.9	3	1.5	1.4	2.5	1	1.6	1.4	2.9	4.9	1.4	1.8	4.2
S20	ThreateningHumans_valence	46	female	100	355.5	8	3.13	2.88	20	18	21	21	5.2	4.5	5	1	3.6	1	1	1	5.2	3.3	4	1	2.6	1	1	1	3.6	3	1.4	2.6	2.2	2.1	2	1.8	3.9	3	1.5	1.4	2.5	1	1.6	1.4	2.9	4.9	1.4	1.8	4.2
S20	ThreateningHumans_anger	46	female	100	355.5	8	3.13	2.88	20	18	21	21	5.2	4.5	5	1	3.6	1	1	1	5.2	3.3	4	1	2.6	1	1	1	3.6	3	1.4	2.6	2.2	2.1	2	1.8	3.9	3	1.5	1.4	2.5	1	1.6	1.4	2.9	4.9	1.4	1.8	4.2
S20	ThreateningHumans_surprise	46	female	100	355.5	8	3.13	2.88	20	18	21	21	5.2	4.5	5	1	3.6	1	1	1	5.2	3.3	4	1	2.6	1	1	1	3.6	3	1.4	2.6	2.2	2.1	2	1.8	3.9	3	1.5	1.4	2.5	1	1.6	1.4	2.9	4.9	1.4	1.8	4.2
S20	PleasantDogs_arousal	46	female	100	355.5	8	3.13	2.88	20	18	21	21	5.2	4.5	5	1	3.6	1	1	1	5.2	3.3	4	1	2.6	1	1	1	3.6	3	1.4	2.6	2.2	2.1	2	1.8	3.9	3	1.5	1.4	2.5	1	1.6	1.4	2.9	4.9	1.4	1.8	4.2
S20	PleasantDogs_happiness	46	female	100	355.5	8	3.13	2.88	20	18	21	21	5.2	4.5	5	1	3.6	1	1	1	5.2	3.3	4	1	2.6	1	1	1	3.6	3	1.4	2.6	2.2	2.1	2	1.8	3.9	3	1.5	1.4	2.5	1	1.6	1.4	2.9	4.9	1.4	1.8	4.2
S20	PleasantDogs_disgust	46	female	100	355.5	8	3.13	2.88	20	18	21	21	5.2	4.5	5	1	3.6	1	1	1	5.2	3.3	4	1	2.6	1	1	1	3.6	3	1.4	2.6	2.2	2.1	2	1.8	3.9	3	1.5	1.4	2.5	1	1.6	1.4	2.9	4.9	1.4	1.8	4.2
S20	PleasantDogs_fear	46	female	100	355.5	8	3.13	2.88	20	18	21	21	5.2	4.5	5	1	3.6	1	1	1	5.2	3.3	4	1	2.6	1	1	1	3.6	3	1.4	2.6	2.2	2.1	2	1.8	3.9	3	1.5	1.4	2.5	1	1.6	1.4	2.9	4.9	1.4	1.8	4.2
S20	PleasantDogs_sadness	46	female	100	355.5	8	3.13	2.88	20	18	21	21	5.2	4.5	5	1	3.6	1	1	1	5.2	3.3	4	1	2.6	1	1	1	3.6	3	1.4	2.6	2.2	2.1	2	1.8	3.9	3	1.5	1.4	2.5	1	1.6	1.4	2.9	4.9	1.4	1.8	4.2
S20	PleasantDogs_valence	46	female	100	355.5	8	3.13	2.88	20	18	21	21	5.2	4.5	5	1	3.6	1	1	1	5.2	3.3	4	1	2.6	1	1	1	3.6	3	1.4	2.6	2.2	2.1	2	1.8	3.9	3	1.5	1.4	2.5	1	1.6	1.4	2.9	4.9	1.4	1.8	4.2
S20	PleasantDogs_anger	46	female	100	355.5	8	3.13	2.88	20	18	21	21	5.2	4.5	5	1	3.6	1	1	1	5.2	3.3	4	1	2.6	1	1	1	3.6	3	1.4	2.6	2.2	2.1	2	1.8	3.9	3	1.5	1.4	2.5	1	1.6	1.4	2.9	4.9	1.4	1.8	4.2
S20	PleasantDogs_surprise	46	female	100	355.5	8	3.13	2.88	20	18	21	21	5.2	4.5	5	1	3.6	1	1	1	5.2	3.3	4	1	2.6	1	1	1	3.6	3	1.4	2.6	2.2	2.1	2	1.8	3.9	3	1.5	1.4	2.5	1	1.6	1.4	2.9	4.9	1.4	1.8	4.2
S20	PleasantHumans_arousal	46	female	100	355.5	8	3.13	2.88	20	18	21	21	5.2	4.5	5	1	3.6	1	1	1	5.2	3.3	4	1	2.6	1	1	1	3.6	3	1.4	2.6	2.2	2.1	2	1.8	3.9	3	1.5	1.4	2.5	1	1.6	1.4	2.9	4.9	1.4	1.8	4.2
S20	PleasantHumans_happiness	46	female	100	355.5	8	3.13	2.88	20	18	21	21	5.2	4.5	5	1	3.6	1	1	1	5.2	3.3	4	1	2.6	1	1	1	3.6	3	1.4	2.6	2.2	2.1	2	1.8	3.9	3	1.5	1.4	2.5	1	1.6	1.4	2.9	4.9	1.4	1.8	4.2
S20	PleasantHumans_disgust	46	female	100	355.5	8	3.13	2.88	20	18	21	21	5.2	4.5	5	1	3.6	1	1	1	5.2	3.3	4	1	2.6	1	1	1	3.6	3	1.4	2.6	2.2	2.1	2	1.8	3.9	3	1.5	1.4	2.5	1	1.6	1.4	2.9	4.9	1.4	1.8	4.2
S20	PleasantHumans_fear	46	female	100	355.5	8	3.13	2.88	20	18	21	21	5.2	4.5	5	1	3.6	1	1	1	5.2	3.3	4	1	2.6	1	1	1	3.6	3	1.4	2.6	2.2	2.1	2	1.8	3.9	3	1.5	1.4	2.5	1	1.6	1.4	2.9	4.9	1.4	1.8	4.2
S20	PleasantHumans_sadness	46	female	100	355.5	8	3.13	2.88	20	18	21	21	5.2	4.5	5	1	3.6	1	1	1	5.2	3.3	4	1	2.6	1	1	1	3.6	3	1.4	2.6	2.2	2.1	2	1.8	3.9	3	1.5	1.4	2.5	1	1.6	1.4	2.9	4.9	1.4	1.8	4.2
S20	PleasantHumans_valence	46	female	100	355.5	8	3.13	2.88	20	18	21	21	5.2	4.5	5	1	3.6	1	1	1	5.2	3.3	4	1	2.6	1	1	1	3.6	3	1.4	2.6	2.2	2.1	2	1.8	3.9	3	1.5	1.4	2.5	1	1.6	1.4	2.9	4.9	1.4	1.8	4.2
S20	PleasantHumans_anger	46	female	100	355.5	8	3.13	2.88	20	18	21	21	5.2	4.5	5	1	3.6	1	1	1	5.2	3.3	4	1	2.6	1	1	1	3.6	3	1.4	2.6	2.2	2.1	2	1.8	3.9	3	1.5	1.4	2.5	1	1.6	1.4	2.9	4.9	1.4	1.8	4.2
S20	PleasantHumans_surprise	46	female	100	355.5	8	3.13	2.88	20	18	21	21	5.2	4.5	5	1	3.6	1	1	1	5.2	3.3	4	1	2.6	1	1	1	3.6	3	1.4	2.6	2.2	2.1	2	1.8	3.9	3	1.5	1.4	2.5	1	1.6	1.4	2.9	4.9	1.4	1.8	4.2
S20	NeutralDogs_arousal	46	female	100	355.5	8	3.13	2.88	20	18	21	21	5.2	4.5	5	1	3.6	1	1	1	5.2	3.3	4	1	2.6	1	1	1	3.6	3	1.4	2.6	2.2	2.1	2	1.8	3.9	3	1.5	1.4	2.5	1	1.6	1.4	2.9	4.9	1.4	1.8	4.2
S20	NeutralDogs_happiness	46	female	100	355.5	8	3.13	2.88	20	18	21	21	5.2	4.5	5	1	3.6	1	1	1	5.2	3.3	4	1	2.6	1	1	1	3.6	3	1.4	2.6	2.2	2.1	2	1.8	3.9	3	1.5	1.4	2.5	1	1.6	1.4	2.9	4.9	1.4	1.8	4.2
S20	NeutralDogs_disgust	46	female	100	355.5	8	3.13	2.88	20	18	21	21	5.2	4.5	5	1	3.6	1	1	1	5.2	3.3	4	1	2.6	1	1	1	3.6	3	1.4	2.6	2.2	2.1	2	1.8	3.9	3	1.5	1.4	2.5	1	1.6	1.4	2.9	4.9	1.4	1.8	4.2
S20	NeutralDogs_fear	46	female	100	355.5	8	3.13	2.88	20	18	21	21	5.2	4.5	5	1	3.6	1	1	1	5.2	3.3	4	1	2.6	1	1	1	3.6	3	1.4	2.6	2.2	2.1	2	1.8	3.9	3	1.5	1.4	2.5	1	1.6	1.4	2.9	4.9	1.4	1.8	4.2
S20	NeutralDogs_sadness	46	female	100	355.5	8	3.13	2.88	20	18	21	21	5.2	4.5	5	1	3.6	1	1	1	5.2	3.3	4	1	2.6	1	1	1	3.6	3	1.4	2.6	2.2	2.1	2	1.8	3.9	3	1.5	1.4	2.5	1	1.6	1.4	2.9	4.9	1.4	1.8	4.2
S20	NeutralDogs_valence	46	female	100	355.5	8	3.13	2.88	20	18	21	21	5.2	4.5	5	1	3.6	1	1	1	5.2	3.3	4	1	2.6	1	1	1	3.6	3	1.4	2.6	2.2	2.1	2	1.8	3.9	3	1.5	1.4	2.5	1	1.6	1.4	2.9	4.9	1.4	1.8	4.2
S20	NeutralDogs_anger	46	female	100	355.5	8	3.13	2.88	20	18	21	21	5.2	4.5	5	1	3.6	1	1	1	5.2	3.3	4	1	2.6	1	1	1	3.6	3	1.4	2.6	2.2	2.1	2	1.8	3.9	3	1.5	1.4	2.5	1	1.6	1.4	2.9	4.9	1.4	1.8	4.2
S20	NeutralDogs_surprise	46	female	100	355.5	8	3.13	2.88	20	18	21	21	5.2	4.5	5	1	3.6	1	1	1	5.2	3.3	4	1	2.6	1	1	1	3.6	3	1.4	2.6	2.2	2.1	2	1.8	3.9	3	1.5	1.4	2.5	1	1.6	1.4	2.9	4.9	1.4	1.8	4.2
S20	NeutralHumans_arousal	46	female	100	355.5	8	3.13	2.88	20	18	21	21	5.2	4.5	5	1	3.6	1	1	1	5.2	3.3	4	1	2.6	1	1	1	3.6	3	1.4	2.6	2.2	2.1	2	1.8	3.9	3	1.5	1.4	2.5	1	1.6	1.4	2.9	4.9	1.4	1.8	4.2
S20	NeutralHumans_happiness	46	female	100	355.5	8	3.13	2.88	20	18	21	21	5.2	4.5	5	1	3.6	1	1	1	5.2	3.3	4	1	2.6	1	1	1	3.6	3	1.4	2.6	2.2	2.1	2	1.8	3.9	3	1.5	1.4	2.5	1	1.6	1.4	2.9	4.9	1.4	1.8	4.2
S20	NeutralHumans_disgust	46	female	100	355.5	8	3.13	2.88	20	18	21	21	5.2	4.5	5	1	3.6	1	1	1	5.2	3.3	4	1	2.6	1	1	1	3.6	3	1.4	2.6	2.2	2.1	2	1.8	3.9	3	1.5	1.4	2.5	1	1.6	1.4	2.9	4.9	1.4	1.8	4.2
S20	NeutralHumans_fear	46	female	100	355.5	8	3.13	2.88	20	18	21	21	5.2	4.5	5	1	3.6	1	1	1	5.2	3.3	4	1	2.6	1	1	1	3.6	3	1.4	2.6	2.2	2.1	2	1.8	3.9	3	1.5	1.4	2.5	1	1.6	1.4	2.9	4.9	1.4	1.8	4.2
S20	NeutralHumans_sadness	46	female	100	355.5	8	3.13	2.88	20	18	21	21	5.2	4.5	5	1	3.6	1	1	1	5.2	3.3	4	1	2.6	1	1	1	3.6	3	1.4	2.6	2.2	2.1	2	1.8	3.9	3	1.5	1.4	2.5	1	1.6	1.4	2.9	4.9	1.4	1.8	4.2
S20	NeutralHumans_valence	46	female	100	355.5	8	3.13	2.88	20	18	21	21	5.2	4.5	5	1	3.6	1	1	1	5.2	3.3	4	1	2.6	1	1	1	3.6	3	1.4	2.6	2.2	2.1	2	1.8	3.9	3	1.5	1.4	2.5	1	1.6	1.4	2.9	4.9	1.4	1.8	4.2
S20	NeutralHumans_anger	46	female	100	355.5	8	3.13	2.88	20	18	21	21	5.2	4.5	5	1	3.6	1	1	1	5.2	3.3	4	1	2.6	1	1	1	3.6	3	1.4	2.6	2.2	2.1	2	1.8	3.9	3	1.5	1.4	2.5	1	1.6	1.4	2.9	4.9	1.4	1.8	4.2
S20	NeutralHumans_surprise	46	female	100	355.5	8	3.13	2.88	20	18	21	21	5.2	4.5	5	1	3.6	1	1	1	5.2	3.3	4	1	2.6	1	1	1	3.6	3	1.4	2.6	2.2	2.1	2	1.8	3.9	3	1.5	1.4	2.5	1	1.6	1.4	2.9	4.9	1.4	1.8	4.2
S20	Object_arousal	46	female	100	355.5	8	3.13	2.88	20	18	21	21	5.2	4.5	5	1	3.6	1	1	1	5.2	3.3	4	1	2.6	1	1	1	3.6	3	1.4	2.6	2.2	2.1	2	1.8	3.9	3	1.5	1.4	2.5	1	1.6	1.4	2.9	4.9	1.4	1.8	4.2
S20	Object_happiness	46	female	100	355.5	8	3.13	2.88	20	18	21	21	5.2	4.5	5	1	3.6	1	1	1	5.2	3.3	4	1	2.6	1	1	1	3.6	3	1.4	2.6	2.2	2.1	2	1.8	3.9	3	1.5	1.4	2.5	1	1.6	1.4	2.9	4.9	1.4	1.8	4.2
S20	Object_disgust	46	female	100	355.5	8	3.13	2.88	20	18	21	21	5.2	4.5	5	1	3.6	1	1	1	5.2	3.3	4	1	2.6	1	1	1	3.6	3	1.4	2.6	2.2	2.1	2	1.8	3.9	3	1.5	1.4	2.5	1	1.6	1.4	2.9	4.9	1.4	1.8	4.2
S20	Object_fear	46	female	100	355.5	8	3.13	2.88	20	18	21	21	5.2	4.5	5	1	3.6	1	1	1	5.2	3.3	4	1	2.6	1	1	1	3.6	3	1.4	2.6	2.2	2.1	2	1.8	3.9	3	1.5	1.4	2.5	1	1.6	1.4	2.9	4.9	1.4	1.8	4.2
S20	Object_sadness	46	female	100	355.5	8	3.13	2.88	20	18	21	21	5.2	4.5	5	1	3.6	1	1	1	5.2	3.3	4	1	2.6	1	1	1	3.6	3	1.4	2.6	2.2	2.1	2	1.8	3.9	3	1.5	1.4	2.5	1	1.6	1.4	2.9	4.9	1.4	1.8	4.2
S20	Object_valence	46	female	100	355.5	8	3.13	2.88	20	18	21	21	5.2	4.5	5	1	3.6	1	1	1	5.2	3.3	4	1	2.6	1	1	1	3.6	3	1.4	2.6	2.2	2.1	2	1.8	3.9	3	1.5	1.4	2.5	1	1.6	1.4	2.9	4.9	1.4	1.8	4.2
S20	Object_anger	46	female	100	355.5	8	3.13	2.88	20	18	21	21	5.2	4.5	5	1	3.6	1	1	1	5.2	3.3	4	1	2.6	1	1	1	3.6	3	1.4	2.6	2.2	2.1	2	1.8	3.9	3	1.5	1.4	2.5	1	1.6	1.4	2.9	4.9	1.4	1.8	4.2
S20	Object_surprise	46	female	100	355.5	8	3.13	2.88	20	18	21	21	5.2	4.5	5	1	3.6	1	1	1	5.2	3.3	4	1	2.6	1	1	1	3.6	3	1.4	2.6	2.2	2.1	2	1.8	3.9	3	1.5	1.4	2.5	1	1.6	1.4	2.9	4.9	1.4	1.8	4.2
S20	Pixel_arousal	46	female	100	355.5	8	3.13	2.88	20	18	21	21	5.2	4.5	5	1	3.6	1	1	1	5.2	3.3	4	1	2.6	1	1	1	3.6	3	1.4	2.6	2.2	2.1	2	1.8	3.9	3	1.5	1.4	2.5	1	1.6	1.4	2.9	4.9	1.4	1.8	4.2
S20	Pixel_happiness	46	female	100	355.5	8	3.13	2.88	20	18	21	21	5.2	4.5	5	1	3.6	1	1	1	5.2	3.3	4	1	2.6	1	1	1	3.6	3	1.4	2.6	2.2	2.1	2	1.8	3.9	3	1.5	1.4	2.5	1	1.6	1.4	2.9	4.9	1.4	1.8	4.2
S20	Pixel_disgust	46	female	100	355.5	8	3.13	2.88	20	18	21	21	5.2	4.5	5	1	3.6	1	1	1	5.2	3.3	4	1	2.6	1	1	1	3.6	3	1.4	2.6	2.2	2.1	2	1.8	3.9	3	1.5	1.4	2.5	1	1.6	1.4	2.9	4.9	1.4	1.8	4.2
S20	Pixel_fear	46	female	100	355.5	8	3.13	2.88	20	18	21	21	5.2	4.5	5	1	3.6	1	1	1	5.2	3.3	4	1	2.6	1	1	1	3.6	3	1.4	2.6	2.2	2.1	2	1.8	3.9	3	1.5	1.4	2.5	1	1.6	1.4	2.9	4.9	1.4	1.8	4.2
S20	Pixel_sadness	46	female	100	355.5	8	3.13	2.88	20	18	21	21	5.2	4.5	5	1	3.6	1	1	1	5.2	3.3	4	1	2.6	1	1	1	3.6	3	1.4	2.6	2.2	2.1	2	1.8	3.9	3	1.5	1.4	2.5	1	1.6	1.4	2.9	4.9	1.4	1.8	4.2
S20	Pixel_valence	46	female	100	355.5	8	3.13	2.88	20	18	21	21	5.2	4.5	5	1	3.6	1	1	1	5.2	3.3	4	1	2.6	1	1	1	3.6	3	1.4	2.6	2.2	2.1	2	1.8	3.9	3	1.5	1.4	2.5	1	1.6	1.4	2.9	4.9	1.4	1.8	4.2
S20	Pixel_anger	46	female	100	355.5	8	3.13	2.88	20	18	21	21	5.2	4.5	5	1	3.6	1	1	1	5.2	3.3	4	1	2.6	1	1	1	3.6	3	1.4	2.6	2.2	2.1	2	1.8	3.9	3	1.5	1.4	2.5	1	1.6	1.4	2.9	4.9	1.4	1.8	4.2
S20	Pixel_surprise	46	female	100	355.5	8	3.13	2.88	20	18	21	21	5.2	4.5	5	1	3.6	1	1	1	5.2	3.3	4	1	2.6	1	1	1	3.6	3	1.4	2.6	2.2	2.1	2	1.8	3.9	3	1.5	1.4	2.5	1	1.6	1.4	2.9	4.9	1.4	1.8	4.2
S21	ThreateningDogs_arousal	43	female	100	461	17	4	2.88	23	17	25	18	6.6	5.9	5.7	1.4	1.8	1.1	1.4	1.1	6.6	5.7	5.7	1.3	1.6	1	1.1	1.1	3.6	4.8	1.6	3.2	1.1	2.2	1.7	1.7	5.5	5.7	3	2.5	1.7	1.5	1.3	1.4	2.2	5.5	1.3	2.2	1.1
S21	ThreateningDogs_happiness	43	female	100	461	17	4	2.88	23	17	25	18	6.6	5.9	5.7	1.4	1.8	1.1	1.4	1.1	6.6	5.7	5.7	1.3	1.6	1	1.1	1.1	3.6	4.8	1.6	3.2	1.1	2.2	1.7	1.7	5.5	5.7	3	2.5	1.7	1.5	1.3	1.4	2.2	5.5	1.3	2.2	1.1
S21	ThreateningDogs_disgust	43	female	100	461	17	4	2.88	23	17	25	18	6.6	5.9	5.7	1.4	1.8	1.1	1.4	1.1	6.6	5.7	5.7	1.3	1.6	1	1.1	1.1	3.6	4.8	1.6	3.2	1.1	2.2	1.7	1.7	5.5	5.7	3	2.5	1.7	1.5	1.3	1.4	2.2	5.5	1.3	2.2	1.1
S21	ThreateningDogs_fear	43	female	100	461	17	4	2.88	23	17	25	18	6.6	5.9	5.7	1.4	1.8	1.1	1.4	1.1	6.6	5.7	5.7	1.3	1.6	1	1.1	1.1	3.6	4.8	1.6	3.2	1.1	2.2	1.7	1.7	5.5	5.7	3	2.5	1.7	1.5	1.3	1.4	2.2	5.5	1.3	2.2	1.1
S21	ThreateningDogs_sadness	43	female	100	461	17	4	2.88	23	17	25	18	6.6	5.9	5.7	1.4	1.8	1.1	1.4	1.1	6.6	5.7	5.7	1.3	1.6	1	1.1	1.1	3.6	4.8	1.6	3.2	1.1	2.2	1.7	1.7	5.5	5.7	3	2.5	1.7	1.5	1.3	1.4	2.2	5.5	1.3	2.2	1.1
S21	ThreateningDogs_valence	43	female	100	461	17	4	2.88	23	17	25	18	6.6	5.9	5.7	1.4	1.8	1.1	1.4	1.1	6.6	5.7	5.7	1.3	1.6	1	1.1	1.1	3.6	4.8	1.6	3.2	1.1	2.2	1.7	1.7	5.5	5.7	3	2.5	1.7	1.5	1.3	1.4	2.2	5.5	1.3	2.2	1.1
S21	ThreateningDogs_anger	43	female	100	461	17	4	2.88	23	17	25	18	6.6	5.9	5.7	1.4	1.8	1.1	1.4	1.1	6.6	5.7	5.7	1.3	1.6	1	1.1	1.1	3.6	4.8	1.6	3.2	1.1	2.2	1.7	1.7	5.5	5.7	3	2.5	1.7	1.5	1.3	1.4	2.2	5.5	1.3	2.2	1.1
S21	ThreateningDogs_surprise	43	female	100	461	17	4	2.88	23	17	25	18	6.6	5.9	5.7	1.4	1.8	1.1	1.4	1.1	6.6	5.7	5.7	1.3	1.6	1	1.1	1.1	3.6	4.8	1.6	3.2	1.1	2.2	1.7	1.7	5.5	5.7	3	2.5	1.7	1.5	1.3	1.4	2.2	5.5	1.3	2.2	1.1
S21	ThreateningHumans_arousal	43	female	100	461	17	4	2.88	23	17	25	18	6.6	5.9	5.7	1.4	1.8	1.1	1.4	1.1	6.6	5.7	5.7	1.3	1.6	1	1.1	1.1	3.6	4.8	1.6	3.2	1.1	2.2	1.7	1.7	5.5	5.7	3	2.5	1.7	1.5	1.3	1.4	2.2	5.5	1.3	2.2	1.1
S21	ThreateningHumans_happiness	43	female	100	461	17	4	2.88	23	17	25	18	6.6	5.9	5.7	1.4	1.8	1.1	1.4	1.1	6.6	5.7	5.7	1.3	1.6	1	1.1	1.1	3.6	4.8	1.6	3.2	1.1	2.2	1.7	1.7	5.5	5.7	3	2.5	1.7	1.5	1.3	1.4	2.2	5.5	1.3	2.2	1.1
S21	ThreateningHumans_disgust	43	female	100	461	17	4	2.88	23	17	25	18	6.6	5.9	5.7	1.4	1.8	1.1	1.4	1.1	6.6	5.7	5.7	1.3	1.6	1	1.1	1.1	3.6	4.8	1.6	3.2	1.1	2.2	1.7	1.7	5.5	5.7	3	2.5	1.7	1.5	1.3	1.4	2.2	5.5	1.3	2.2	1.1
S21	ThreateningHumans_fear	43	female	100	461	17	4	2.88	23	17	25	18	6.6	5.9	5.7	1.4	1.8	1.1	1.4	1.1	6.6	5.7	5.7	1.3	1.6	1	1.1	1.1	3.6	4.8	1.6	3.2	1.1	2.2	1.7	1.7	5.5	5.7	3	2.5	1.7	1.5	1.3	1.4	2.2	5.5	1.3	2.2	1.1
S21	ThreateningHumans_sadness	43	female	100	461	17	4	2.88	23	17	25	18	6.6	5.9	5.7	1.4	1.8	1.1	1.4	1.1	6.6	5.7	5.7	1.3	1.6	1	1.1	1.1	3.6	4.8	1.6	3.2	1.1	2.2	1.7	1.7	5.5	5.7	3	2.5	1.7	1.5	1.3	1.4	2.2	5.5	1.3	2.2	1.1
S21	ThreateningHumans_valence	43	female	100	461	17	4	2.88	23	17	25	18	6.6	5.9	5.7	1.4	1.8	1.1	1.4	1.1	6.6	5.7	5.7	1.3	1.6	1	1.1	1.1	3.6	4.8	1.6	3.2	1.1	2.2	1.7	1.7	5.5	5.7	3	2.5	1.7	1.5	1.3	1.4	2.2	5.5	1.3	2.2	1.1
S21	ThreateningHumans_anger	43	female	100	461	17	4	2.88	23	17	25	18	6.6	5.9	5.7	1.4	1.8	1.1	1.4	1.1	6.6	5.7	5.7	1.3	1.6	1	1.1	1.1	3.6	4.8	1.6	3.2	1.1	2.2	1.7	1.7	5.5	5.7	3	2.5	1.7	1.5	1.3	1.4	2.2	5.5	1.3	2.2	1.1
S21	ThreateningHumans_surprise	43	female	100	461	17	4	2.88	23	17	25	18	6.6	5.9	5.7	1.4	1.8	1.1	1.4	1.1	6.6	5.7	5.7	1.3	1.6	1	1.1	1.1	3.6	4.8	1.6	3.2	1.1	2.2	1.7	1.7	5.5	5.7	3	2.5	1.7	1.5	1.3	1.4	2.2	5.5	1.3	2.2	1.1
S21	PleasantDogs_arousal	43	female	100	461	17	4	2.88	23	17	25	18	6.6	5.9	5.7	1.4	1.8	1.1	1.4	1.1	6.6	5.7	5.7	1.3	1.6	1	1.1	1.1	3.6	4.8	1.6	3.2	1.1	2.2	1.7	1.7	5.5	5.7	3	2.5	1.7	1.5	1.3	1.4	2.2	5.5	1.3	2.2	1.1
S21	PleasantDogs_happiness	43	female	100	461	17	4	2.88	23	17	25	18	6.6	5.9	5.7	1.4	1.8	1.1	1.4	1.1	6.6	5.7	5.7	1.3	1.6	1	1.1	1.1	3.6	4.8	1.6	3.2	1.1	2.2	1.7	1.7	5.5	5.7	3	2.5	1.7	1.5	1.3	1.4	2.2	5.5	1.3	2.2	1.1
S21	PleasantDogs_disgust	43	female	100	461	17	4	2.88	23	17	25	18	6.6	5.9	5.7	1.4	1.8	1.1	1.4	1.1	6.6	5.7	5.7	1.3	1.6	1	1.1	1.1	3.6	4.8	1.6	3.2	1.1	2.2	1.7	1.7	5.5	5.7	3	2.5	1.7	1.5	1.3	1.4	2.2	5.5	1.3	2.2	1.1
S21	PleasantDogs_fear	43	female	100	461	17	4	2.88	23	17	25	18	6.6	5.9	5.7	1.4	1.8	1.1	1.4	1.1	6.6	5.7	5.7	1.3	1.6	1	1.1	1.1	3.6	4.8	1.6	3.2	1.1	2.2	1.7	1.7	5.5	5.7	3	2.5	1.7	1.5	1.3	1.4	2.2	5.5	1.3	2.2	1.1
S21	PleasantDogs_sadness	43	female	100	461	17	4	2.88	23	17	25	18	6.6	5.9	5.7	1.4	1.8	1.1	1.4	1.1	6.6	5.7	5.7	1.3	1.6	1	1.1	1.1	3.6	4.8	1.6	3.2	1.1	2.2	1.7	1.7	5.5	5.7	3	2.5	1.7	1.5	1.3	1.4	2.2	5.5	1.3	2.2	1.1
S21	PleasantDogs_valence	43	female	100	461	17	4	2.88	23	17	25	18	6.6	5.9	5.7	1.4	1.8	1.1	1.4	1.1	6.6	5.7	5.7	1.3	1.6	1	1.1	1.1	3.6	4.8	1.6	3.2	1.1	2.2	1.7	1.7	5.5	5.7	3	2.5	1.7	1.5	1.3	1.4	2.2	5.5	1.3	2.2	1.1
S21	PleasantDogs_anger	43	female	100	461	17	4	2.88	23	17	25	18	6.6	5.9	5.7	1.4	1.8	1.1	1.4	1.1	6.6	5.7	5.7	1.3	1.6	1	1.1	1.1	3.6	4.8	1.6	3.2	1.1	2.2	1.7	1.7	5.5	5.7	3	2.5	1.7	1.5	1.3	1.4	2.2	5.5	1.3	2.2	1.1
S21	PleasantDogs_surprise	43	female	100	461	17	4	2.88	23	17	25	18	6.6	5.9	5.7	1.4	1.8	1.1	1.4	1.1	6.6	5.7	5.7	1.3	1.6	1	1.1	1.1	3.6	4.8	1.6	3.2	1.1	2.2	1.7	1.7	5.5	5.7	3	2.5	1.7	1.5	1.3	1.4	2.2	5.5	1.3	2.2	1.1
S21	PleasantHumans_arousal	43	female	100	461	17	4	2.88	23	17	25	18	6.6	5.9	5.7	1.4	1.8	1.1	1.4	1.1	6.6	5.7	5.7	1.3	1.6	1	1.1	1.1	3.6	4.8	1.6	3.2	1.1	2.2	1.7	1.7	5.5	5.7	3	2.5	1.7	1.5	1.3	1.4	2.2	5.5	1.3	2.2	1.1
S21	PleasantHumans_happiness	43	female	100	461	17	4	2.88	23	17	25	18	6.6	5.9	5.7	1.4	1.8	1.1	1.4	1.1	6.6	5.7	5.7	1.3	1.6	1	1.1	1.1	3.6	4.8	1.6	3.2	1.1	2.2	1.7	1.7	5.5	5.7	3	2.5	1.7	1.5	1.3	1.4	2.2	5.5	1.3	2.2	1.1
S21	PleasantHumans_disgust	43	female	100	461	17	4	2.88	23	17	25	18	6.6	5.9	5.7	1.4	1.8	1.1	1.4	1.1	6.6	5.7	5.7	1.3	1.6	1	1.1	1.1	3.6	4.8	1.6	3.2	1.1	2.2	1.7	1.7	5.5	5.7	3	2.5	1.7	1.5	1.3	1.4	2.2	5.5	1.3	2.2	1.1
S21	PleasantHumans_fear	43	female	100	461	17	4	2.88	23	17	25	18	6.6	5.9	5.7	1.4	1.8	1.1	1.4	1.1	6.6	5.7	5.7	1.3	1.6	1	1.1	1.1	3.6	4.8	1.6	3.2	1.1	2.2	1.7	1.7	5.5	5.7	3	2.5	1.7	1.5	1.3	1.4	2.2	5.5	1.3	2.2	1.1
S21	PleasantHumans_sadness	43	female	100	461	17	4	2.88	23	17	25	18	6.6	5.9	5.7	1.4	1.8	1.1	1.4	1.1	6.6	5.7	5.7	1.3	1.6	1	1.1	1.1	3.6	4.8	1.6	3.2	1.1	2.2	1.7	1.7	5.5	5.7	3	2.5	1.7	1.5	1.3	1.4	2.2	5.5	1.3	2.2	1.1
S21	PleasantHumans_valence	43	female	100	461	17	4	2.88	23	17	25	18	6.6	5.9	5.7	1.4	1.8	1.1	1.4	1.1	6.6	5.7	5.7	1.3	1.6	1	1.1	1.1	3.6	4.8	1.6	3.2	1.1	2.2	1.7	1.7	5.5	5.7	3	2.5	1.7	1.5	1.3	1.4	2.2	5.5	1.3	2.2	1.1
S21	PleasantHumans_anger	43	female	100	461	17	4	2.88	23	17	25	18	6.6	5.9	5.7	1.4	1.8	1.1	1.4	1.1	6.6	5.7	5.7	1.3	1.6	1	1.1	1.1	3.6	4.8	1.6	3.2	1.1	2.2	1.7	1.7	5.5	5.7	3	2.5	1.7	1.5	1.3	1.4	2.2	5.5	1.3	2.2	1.1
S21	PleasantHumans_surprise	43	female	100	461	17	4	2.88	23	17	25	18	6.6	5.9	5.7	1.4	1.8	1.1	1.4	1.1	6.6	5.7	5.7	1.3	1.6	1	1.1	1.1	3.6	4.8	1.6	3.2	1.1	2.2	1.7	1.7	5.5	5.7	3	2.5	1.7	1.5	1.3	1.4	2.2	5.5	1.3	2.2	1.1
S21	NeutralDogs_arousal	43	female	100	461	17	4	2.88	23	17	25	18	6.6	5.9	5.7	1.4	1.8	1.1	1.4	1.1	6.6	5.7	5.7	1.3	1.6	1	1.1	1.1	3.6	4.8	1.6	3.2	1.1	2.2	1.7	1.7	5.5	5.7	3	2.5	1.7	1.5	1.3	1.4	2.2	5.5	1.3	2.2	1.1
S21	NeutralDogs_happiness	43	female	100	461	17	4	2.88	23	17	25	18	6.6	5.9	5.7	1.4	1.8	1.1	1.4	1.1	6.6	5.7	5.7	1.3	1.6	1	1.1	1.1	3.6	4.8	1.6	3.2	1.1	2.2	1.7	1.7	5.5	5.7	3	2.5	1.7	1.5	1.3	1.4	2.2	5.5	1.3	2.2	1.1
S21	NeutralDogs_disgust	43	female	100	461	17	4	2.88	23	17	25	18	6.6	5.9	5.7	1.4	1.8	1.1	1.4	1.1	6.6	5.7	5.7	1.3	1.6	1	1.1	1.1	3.6	4.8	1.6	3.2	1.1	2.2	1.7	1.7	5.5	5.7	3	2.5	1.7	1.5	1.3	1.4	2.2	5.5	1.3	2.2	1.1
S21	NeutralDogs_fear	43	female	100	461	17	4	2.88	23	17	25	18	6.6	5.9	5.7	1.4	1.8	1.1	1.4	1.1	6.6	5.7	5.7	1.3	1.6	1	1.1	1.1	3.6	4.8	1.6	3.2	1.1	2.2	1.7	1.7	5.5	5.7	3	2.5	1.7	1.5	1.3	1.4	2.2	5.5	1.3	2.2	1.1
S21	NeutralDogs_sadness	43	female	100	461	17	4	2.88	23	17	25	18	6.6	5.9	5.7	1.4	1.8	1.1	1.4	1.1	6.6	5.7	5.7	1.3	1.6	1	1.1	1.1	3.6	4.8	1.6	3.2	1.1	2.2	1.7	1.7	5.5	5.7	3	2.5	1.7	1.5	1.3	1.4	2.2	5.5	1.3	2.2	1.1
S21	NeutralDogs_valence	43	female	100	461	17	4	2.88	23	17	25	18	6.6	5.9	5.7	1.4	1.8	1.1	1.4	1.1	6.6	5.7	5.7	1.3	1.6	1	1.1	1.1	3.6	4.8	1.6	3.2	1.1	2.2	1.7	1.7	5.5	5.7	3	2.5	1.7	1.5	1.3	1.4	2.2	5.5	1.3	2.2	1.1
S21	NeutralDogs_anger	43	female	100	461	17	4	2.88	23	17	25	18	6.6	5.9	5.7	1.4	1.8	1.1	1.4	1.1	6.6	5.7	5.7	1.3	1.6	1	1.1	1.1	3.6	4.8	1.6	3.2	1.1	2.2	1.7	1.7	5.5	5.7	3	2.5	1.7	1.5	1.3	1.4	2.2	5.5	1.3	2.2	1.1
S21	NeutralDogs_surprise	43	female	100	461	17	4	2.88	23	17	25	18	6.6	5.9	5.7	1.4	1.8	1.1	1.4	1.1	6.6	5.7	5.7	1.3	1.6	1	1.1	1.1	3.6	4.8	1.6	3.2	1.1	2.2	1.7	1.7	5.5	5.7	3	2.5	1.7	1.5	1.3	1.4	2.2	5.5	1.3	2.2	1.1
S21	NeutralHumans_arousal	43	female	100	461	17	4	2.88	23	17	25	18	6.6	5.9	5.7	1.4	1.8	1.1	1.4	1.1	6.6	5.7	5.7	1.3	1.6	1	1.1	1.1	3.6	4.8	1.6	3.2	1.1	2.2	1.7	1.7	5.5	5.7	3	2.5	1.7	1.5	1.3	1.4	2.2	5.5	1.3	2.2	1.1
S21	NeutralHumans_happiness	43	female	100	461	17	4	2.88	23	17	25	18	6.6	5.9	5.7	1.4	1.8	1.1	1.4	1.1	6.6	5.7	5.7	1.3	1.6	1	1.1	1.1	3.6	4.8	1.6	3.2	1.1	2.2	1.7	1.7	5.5	5.7	3	2.5	1.7	1.5	1.3	1.4	2.2	5.5	1.3	2.2	1.1
S21	NeutralHumans_disgust	43	female	100	461	17	4	2.88	23	17	25	18	6.6	5.9	5.7	1.4	1.8	1.1	1.4	1.1	6.6	5.7	5.7	1.3	1.6	1	1.1	1.1	3.6	4.8	1.6	3.2	1.1	2.2	1.7	1.7	5.5	5.7	3	2.5	1.7	1.5	1.3	1.4	2.2	5.5	1.3	2.2	1.1
S21	NeutralHumans_fear	43	female	100	461	17	4	2.88	23	17	25	18	6.6	5.9	5.7	1.4	1.8	1.1	1.4	1.1	6.6	5.7	5.7	1.3	1.6	1	1.1	1.1	3.6	4.8	1.6	3.2	1.1	2.2	1.7	1.7	5.5	5.7	3	2.5	1.7	1.5	1.3	1.4	2.2	5.5	1.3	2.2	1.1
S21	NeutralHumans_sadness	43	female	100	461	17	4	2.88	23	17	25	18	6.6	5.9	5.7	1.4	1.8	1.1	1.4	1.1	6.6	5.7	5.7	1.3	1.6	1	1.1	1.1	3.6	4.8	1.6	3.2	1.1	2.2	1.7	1.7	5.5	5.7	3	2.5	1.7	1.5	1.3	1.4	2.2	5.5	1.3	2.2	1.1
S21	NeutralHumans_valence	43	female	100	461	17	4	2.88	23	17	25	18	6.6	5.9	5.7	1.4	1.8	1.1	1.4	1.1	6.6	5.7	5.7	1.3	1.6	1	1.1	1.1	3.6	4.8	1.6	3.2	1.1	2.2	1.7	1.7	5.5	5.7	3	2.5	1.7	1.5	1.3	1.4	2.2	5.5	1.3	2.2	1.1
S21	NeutralHumans_anger	43	female	100	461	17	4	2.88	23	17	25	18	6.6	5.9	5.7	1.4	1.8	1.1	1.4	1.1	6.6	5.7	5.7	1.3	1.6	1	1.1	1.1	3.6	4.8	1.6	3.2	1.1	2.2	1.7	1.7	5.5	5.7	3	2.5	1.7	1.5	1.3	1.4	2.2	5.5	1.3	2.2	1.1
S21	NeutralHumans_surprise	43	female	100	461	17	4	2.88	23	17	25	18	6.6	5.9	5.7	1.4	1.8	1.1	1.4	1.1	6.6	5.7	5.7	1.3	1.6	1	1.1	1.1	3.6	4.8	1.6	3.2	1.1	2.2	1.7	1.7	5.5	5.7	3	2.5	1.7	1.5	1.3	1.4	2.2	5.5	1.3	2.2	1.1
S21	Object_arousal	43	female	100	461	17	4	2.88	23	17	25	18	6.6	5.9	5.7	1.4	1.8	1.1	1.4	1.1	6.6	5.7	5.7	1.3	1.6	1	1.1	1.1	3.6	4.8	1.6	3.2	1.1	2.2	1.7	1.7	5.5	5.7	3	2.5	1.7	1.5	1.3	1.4	2.2	5.5	1.3	2.2	1.1
S21	Object_happiness	43	female	100	461	17	4	2.88	23	17	25	18	6.6	5.9	5.7	1.4	1.8	1.1	1.4	1.1	6.6	5.7	5.7	1.3	1.6	1	1.1	1.1	3.6	4.8	1.6	3.2	1.1	2.2	1.7	1.7	5.5	5.7	3	2.5	1.7	1.5	1.3	1.4	2.2	5.5	1.3	2.2	1.1
S21	Object_disgust	43	female	100	461	17	4	2.88	23	17	25	18	6.6	5.9	5.7	1.4	1.8	1.1	1.4	1.1	6.6	5.7	5.7	1.3	1.6	1	1.1	1.1	3.6	4.8	1.6	3.2	1.1	2.2	1.7	1.7	5.5	5.7	3	2.5	1.7	1.5	1.3	1.4	2.2	5.5	1.3	2.2	1.1
S21	Object_fear	43	female	100	461	17	4	2.88	23	17	25	18	6.6	5.9	5.7	1.4	1.8	1.1	1.4	1.1	6.6	5.7	5.7	1.3	1.6	1	1.1	1.1	3.6	4.8	1.6	3.2	1.1	2.2	1.7	1.7	5.5	5.7	3	2.5	1.7	1.5	1.3	1.4	2.2	5.5	1.3	2.2	1.1
S21	Object_sadness	43	female	100	461	17	4	2.88	23	17	25	18	6.6	5.9	5.7	1.4	1.8	1.1	1.4	1.1	6.6	5.7	5.7	1.3	1.6	1	1.1	1.1	3.6	4.8	1.6	3.2	1.1	2.2	1.7	1.7	5.5	5.7	3	2.5	1.7	1.5	1.3	1.4	2.2	5.5	1.3	2.2	1.1
S21	Object_valence	43	female	100	461	17	4	2.88	23	17	25	18	6.6	5.9	5.7	1.4	1.8	1.1	1.4	1.1	6.6	5.7	5.7	1.3	1.6	1	1.1	1.1	3.6	4.8	1.6	3.2	1.1	2.2	1.7	1.7	5.5	5.7	3	2.5	1.7	1.5	1.3	1.4	2.2	5.5	1.3	2.2	1.1
S21	Object_anger	43	female	100	461	17	4	2.88	23	17	25	18	6.6	5.9	5.7	1.4	1.8	1.1	1.4	1.1	6.6	5.7	5.7	1.3	1.6	1	1.1	1.1	3.6	4.8	1.6	3.2	1.1	2.2	1.7	1.7	5.5	5.7	3	2.5	1.7	1.5	1.3	1.4	2.2	5.5	1.3	2.2	1.1
S21	Object_surprise	43	female	100	461	17	4	2.88	23	17	25	18	6.6	5.9	5.7	1.4	1.8	1.1	1.4	1.1	6.6	5.7	5.7	1.3	1.6	1	1.1	1.1	3.6	4.8	1.6	3.2	1.1	2.2	1.7	1.7	5.5	5.7	3	2.5	1.7	1.5	1.3	1.4	2.2	5.5	1.3	2.2	1.1
S21	Pixel_arousal	43	female	100	461	17	4	2.88	23	17	25	18	6.6	5.9	5.7	1.4	1.8	1.1	1.4	1.1	6.6	5.7	5.7	1.3	1.6	1	1.1	1.1	3.6	4.8	1.6	3.2	1.1	2.2	1.7	1.7	5.5	5.7	3	2.5	1.7	1.5	1.3	1.4	2.2	5.5	1.3	2.2	1.1
S21	Pixel_happiness	43	female	100	461	17	4	2.88	23	17	25	18	6.6	5.9	5.7	1.4	1.8	1.1	1.4	1.1	6.6	5.7	5.7	1.3	1.6	1	1.1	1.1	3.6	4.8	1.6	3.2	1.1	2.2	1.7	1.7	5.5	5.7	3	2.5	1.7	1.5	1.3	1.4	2.2	5.5	1.3	2.2	1.1
S21	Pixel_disgust	43	female	100	461	17	4	2.88	23	17	25	18	6.6	5.9	5.7	1.4	1.8	1.1	1.4	1.1	6.6	5.7	5.7	1.3	1.6	1	1.1	1.1	3.6	4.8	1.6	3.2	1.1	2.2	1.7	1.7	5.5	5.7	3	2.5	1.7	1.5	1.3	1.4	2.2	5.5	1.3	2.2	1.1
S21	Pixel_fear	43	female	100	461	17	4	2.88	23	17	25	18	6.6	5.9	5.7	1.4	1.8	1.1	1.4	1.1	6.6	5.7	5.7	1.3	1.6	1	1.1	1.1	3.6	4.8	1.6	3.2	1.1	2.2	1.7	1.7	5.5	5.7	3	2.5	1.7	1.5	1.3	1.4	2.2	5.5	1.3	2.2	1.1
S21	Pixel_sadness	43	female	100	461	17	4	2.88	23	17	25	18	6.6	5.9	5.7	1.4	1.8	1.1	1.4	1.1	6.6	5.7	5.7	1.3	1.6	1	1.1	1.1	3.6	4.8	1.6	3.2	1.1	2.2	1.7	1.7	5.5	5.7	3	2.5	1.7	1.5	1.3	1.4	2.2	5.5	1.3	2.2	1.1
S21	Pixel_valence	43	female	100	461	17	4	2.88	23	17	25	18	6.6	5.9	5.7	1.4	1.8	1.1	1.4	1.1	6.6	5.7	5.7	1.3	1.6	1	1.1	1.1	3.6	4.8	1.6	3.2	1.1	2.2	1.7	1.7	5.5	5.7	3	2.5	1.7	1.5	1.3	1.4	2.2	5.5	1.3	2.2	1.1
S21	Pixel_anger	43	female	100	461	17	4	2.88	23	17	25	18	6.6	5.9	5.7	1.4	1.8	1.1	1.4	1.1	6.6	5.7	5.7	1.3	1.6	1	1.1	1.1	3.6	4.8	1.6	3.2	1.1	2.2	1.7	1.7	5.5	5.7	3	2.5	1.7	1.5	1.3	1.4	2.2	5.5	1.3	2.2	1.1
S21	Pixel_surprise	43	female	100	461	17	4	2.88	23	17	25	18	6.6	5.9	5.7	1.4	1.8	1.1	1.4	1.1	6.6	5.7	5.7	1.3	1.6	1	1.1	1.1	3.6	4.8	1.6	3.2	1.1	2.2	1.7	1.7	5.5	5.7	3	2.5	1.7	1.5	1.3	1.4	2.2	5.5	1.3	2.2	1.1
S22	ThreateningDogs_arousal	34	female	100	376.5	10	2.25	3.5	11	15	19	13	5.5	4.1	4.9	1.1	1.8	1	1	1	5.1	3.6	3.6	1.1	1.5	1	1	1	3.8	2.4	1.4	1.2	1.4	1.9	1.4	1.3	4.1	2.7	2	1.5	1.6	1	1.1	1	2.2	5.3	1	1.4	1.5
S22	ThreateningDogs_happiness	34	female	100	376.5	10	2.25	3.5	11	15	19	13	5.5	4.1	4.9	1.1	1.8	1	1	1	5.1	3.6	3.6	1.1	1.5	1	1	1	3.8	2.4	1.4	1.2	1.4	1.9	1.4	1.3	4.1	2.7	2	1.5	1.6	1	1.1	1	2.2	5.3	1	1.4	1.5
S22	ThreateningDogs_disgust	34	female	100	376.5	10	2.25	3.5	11	15	19	13	5.5	4.1	4.9	1.1	1.8	1	1	1	5.1	3.6	3.6	1.1	1.5	1	1	1	3.8	2.4	1.4	1.2	1.4	1.9	1.4	1.3	4.1	2.7	2	1.5	1.6	1	1.1	1	2.2	5.3	1	1.4	1.5
S22	ThreateningDogs_fear	34	female	100	376.5	10	2.25	3.5	11	15	19	13	5.5	4.1	4.9	1.1	1.8	1	1	1	5.1	3.6	3.6	1.1	1.5	1	1	1	3.8	2.4	1.4	1.2	1.4	1.9	1.4	1.3	4.1	2.7	2	1.5	1.6	1	1.1	1	2.2	5.3	1	1.4	1.5
S22	ThreateningDogs_sadness	34	female	100	376.5	10	2.25	3.5	11	15	19	13	5.5	4.1	4.9	1.1	1.8	1	1	1	5.1	3.6	3.6	1.1	1.5	1	1	1	3.8	2.4	1.4	1.2	1.4	1.9	1.4	1.3	4.1	2.7	2	1.5	1.6	1	1.1	1	2.2	5.3	1	1.4	1.5
S22	ThreateningDogs_valence	34	female	100	376.5	10	2.25	3.5	11	15	19	13	5.5	4.1	4.9	1.1	1.8	1	1	1	5.1	3.6	3.6	1.1	1.5	1	1	1	3.8	2.4	1.4	1.2	1.4	1.9	1.4	1.3	4.1	2.7	2	1.5	1.6	1	1.1	1	2.2	5.3	1	1.4	1.5
S22	ThreateningDogs_anger	34	female	100	376.5	10	2.25	3.5	11	15	19	13	5.5	4.1	4.9	1.1	1.8	1	1	1	5.1	3.6	3.6	1.1	1.5	1	1	1	3.8	2.4	1.4	1.2	1.4	1.9	1.4	1.3	4.1	2.7	2	1.5	1.6	1	1.1	1	2.2	5.3	1	1.4	1.5
S22	ThreateningDogs_surprise	34	female	100	376.5	10	2.25	3.5	11	15	19	13	5.5	4.1	4.9	1.1	1.8	1	1	1	5.1	3.6	3.6	1.1	1.5	1	1	1	3.8	2.4	1.4	1.2	1.4	1.9	1.4	1.3	4.1	2.7	2	1.5	1.6	1	1.1	1	2.2	5.3	1	1.4	1.5
S22	ThreateningHumans_arousal	34	female	100	376.5	10	2.25	3.5	11	15	19	13	5.5	4.1	4.9	1.1	1.8	1	1	1	5.1	3.6	3.6	1.1	1.5	1	1	1	3.8	2.4	1.4	1.2	1.4	1.9	1.4	1.3	4.1	2.7	2	1.5	1.6	1	1.1	1	2.2	5.3	1	1.4	1.5
S22	ThreateningHumans_happiness	34	female	100	376.5	10	2.25	3.5	11	15	19	13	5.5	4.1	4.9	1.1	1.8	1	1	1	5.1	3.6	3.6	1.1	1.5	1	1	1	3.8	2.4	1.4	1.2	1.4	1.9	1.4	1.3	4.1	2.7	2	1.5	1.6	1	1.1	1	2.2	5.3	1	1.4	1.5
S22	ThreateningHumans_disgust	34	female	100	376.5	10	2.25	3.5	11	15	19	13	5.5	4.1	4.9	1.1	1.8	1	1	1	5.1	3.6	3.6	1.1	1.5	1	1	1	3.8	2.4	1.4	1.2	1.4	1.9	1.4	1.3	4.1	2.7	2	1.5	1.6	1	1.1	1	2.2	5.3	1	1.4	1.5
S22	ThreateningHumans_fear	34	female	100	376.5	10	2.25	3.5	11	15	19	13	5.5	4.1	4.9	1.1	1.8	1	1	1	5.1	3.6	3.6	1.1	1.5	1	1	1	3.8	2.4	1.4	1.2	1.4	1.9	1.4	1.3	4.1	2.7	2	1.5	1.6	1	1.1	1	2.2	5.3	1	1.4	1.5
S22	ThreateningHumans_sadness	34	female	100	376.5	10	2.25	3.5	11	15	19	13	5.5	4.1	4.9	1.1	1.8	1	1	1	5.1	3.6	3.6	1.1	1.5	1	1	1	3.8	2.4	1.4	1.2	1.4	1.9	1.4	1.3	4.1	2.7	2	1.5	1.6	1	1.1	1	2.2	5.3	1	1.4	1.5
S22	ThreateningHumans_valence	34	female	100	376.5	10	2.25	3.5	11	15	19	13	5.5	4.1	4.9	1.1	1.8	1	1	1	5.1	3.6	3.6	1.1	1.5	1	1	1	3.8	2.4	1.4	1.2	1.4	1.9	1.4	1.3	4.1	2.7	2	1.5	1.6	1	1.1	1	2.2	5.3	1	1.4	1.5
S22	ThreateningHumans_anger	34	female	100	376.5	10	2.25	3.5	11	15	19	13	5.5	4.1	4.9	1.1	1.8	1	1	1	5.1	3.6	3.6	1.1	1.5	1	1	1	3.8	2.4	1.4	1.2	1.4	1.9	1.4	1.3	4.1	2.7	2	1.5	1.6	1	1.1	1	2.2	5.3	1	1.4	1.5
S22	ThreateningHumans_surprise	34	female	100	376.5	10	2.25	3.5	11	15	19	13	5.5	4.1	4.9	1.1	1.8	1	1	1	5.1	3.6	3.6	1.1	1.5	1	1	1	3.8	2.4	1.4	1.2	1.4	1.9	1.4	1.3	4.1	2.7	2	1.5	1.6	1	1.1	1	2.2	5.3	1	1.4	1.5
S22	PleasantDogs_arousal	34	female	100	376.5	10	2.25	3.5	11	15	19	13	5.5	4.1	4.9	1.1	1.8	1	1	1	5.1	3.6	3.6	1.1	1.5	1	1	1	3.8	2.4	1.4	1.2	1.4	1.9	1.4	1.3	4.1	2.7	2	1.5	1.6	1	1.1	1	2.2	5.3	1	1.4	1.5
S22	PleasantDogs_happiness	34	female	100	376.5	10	2.25	3.5	11	15	19	13	5.5	4.1	4.9	1.1	1.8	1	1	1	5.1	3.6	3.6	1.1	1.5	1	1	1	3.8	2.4	1.4	1.2	1.4	1.9	1.4	1.3	4.1	2.7	2	1.5	1.6	1	1.1	1	2.2	5.3	1	1.4	1.5
S22	PleasantDogs_disgust	34	female	100	376.5	10	2.25	3.5	11	15	19	13	5.5	4.1	4.9	1.1	1.8	1	1	1	5.1	3.6	3.6	1.1	1.5	1	1	1	3.8	2.4	1.4	1.2	1.4	1.9	1.4	1.3	4.1	2.7	2	1.5	1.6	1	1.1	1	2.2	5.3	1	1.4	1.5
S22	PleasantDogs_fear	34	female	100	376.5	10	2.25	3.5	11	15	19	13	5.5	4.1	4.9	1.1	1.8	1	1	1	5.1	3.6	3.6	1.1	1.5	1	1	1	3.8	2.4	1.4	1.2	1.4	1.9	1.4	1.3	4.1	2.7	2	1.5	1.6	1	1.1	1	2.2	5.3	1	1.4	1.5
S22	PleasantDogs_sadness	34	female	100	376.5	10	2.25	3.5	11	15	19	13	5.5	4.1	4.9	1.1	1.8	1	1	1	5.1	3.6	3.6	1.1	1.5	1	1	1	3.8	2.4	1.4	1.2	1.4	1.9	1.4	1.3	4.1	2.7	2	1.5	1.6	1	1.1	1	2.2	5.3	1	1.4	1.5
S22	PleasantDogs_valence	34	female	100	376.5	10	2.25	3.5	11	15	19	13	5.5	4.1	4.9	1.1	1.8	1	1	1	5.1	3.6	3.6	1.1	1.5	1	1	1	3.8	2.4	1.4	1.2	1.4	1.9	1.4	1.3	4.1	2.7	2	1.5	1.6	1	1.1	1	2.2	5.3	1	1.4	1.5
S22	PleasantDogs_anger	34	female	100	376.5	10	2.25	3.5	11	15	19	13	5.5	4.1	4.9	1.1	1.8	1	1	1	5.1	3.6	3.6	1.1	1.5	1	1	1	3.8	2.4	1.4	1.2	1.4	1.9	1.4	1.3	4.1	2.7	2	1.5	1.6	1	1.1	1	2.2	5.3	1	1.4	1.5
S22	PleasantDogs_surprise	34	female	100	376.5	10	2.25	3.5	11	15	19	13	5.5	4.1	4.9	1.1	1.8	1	1	1	5.1	3.6	3.6	1.1	1.5	1	1	1	3.8	2.4	1.4	1.2	1.4	1.9	1.4	1.3	4.1	2.7	2	1.5	1.6	1	1.1	1	2.2	5.3	1	1.4	1.5
S22	PleasantHumans_arousal	34	female	100	376.5	10	2.25	3.5	11	15	19	13	5.5	4.1	4.9	1.1	1.8	1	1	1	5.1	3.6	3.6	1.1	1.5	1	1	1	3.8	2.4	1.4	1.2	1.4	1.9	1.4	1.3	4.1	2.7	2	1.5	1.6	1	1.1	1	2.2	5.3	1	1.4	1.5
S22	PleasantHumans_happiness	34	female	100	376.5	10	2.25	3.5	11	15	19	13	5.5	4.1	4.9	1.1	1.8	1	1	1	5.1	3.6	3.6	1.1	1.5	1	1	1	3.8	2.4	1.4	1.2	1.4	1.9	1.4	1.3	4.1	2.7	2	1.5	1.6	1	1.1	1	2.2	5.3	1	1.4	1.5
S22	PleasantHumans_disgust	34	female	100	376.5	10	2.25	3.5	11	15	19	13	5.5	4.1	4.9	1.1	1.8	1	1	1	5.1	3.6	3.6	1.1	1.5	1	1	1	3.8	2.4	1.4	1.2	1.4	1.9	1.4	1.3	4.1	2.7	2	1.5	1.6	1	1.1	1	2.2	5.3	1	1.4	1.5
S22	PleasantHumans_fear	34	female	100	376.5	10	2.25	3.5	11	15	19	13	5.5	4.1	4.9	1.1	1.8	1	1	1	5.1	3.6	3.6	1.1	1.5	1	1	1	3.8	2.4	1.4	1.2	1.4	1.9	1.4	1.3	4.1	2.7	2	1.5	1.6	1	1.1	1	2.2	5.3	1	1.4	1.5
S22	PleasantHumans_sadness	34	female	100	376.5	10	2.25	3.5	11	15	19	13	5.5	4.1	4.9	1.1	1.8	1	1	1	5.1	3.6	3.6	1.1	1.5	1	1	1	3.8	2.4	1.4	1.2	1.4	1.9	1.4	1.3	4.1	2.7	2	1.5	1.6	1	1.1	1	2.2	5.3	1	1.4	1.5
S22	PleasantHumans_valence	34	female	100	376.5	10	2.25	3.5	11	15	19	13	5.5	4.1	4.9	1.1	1.8	1	1	1	5.1	3.6	3.6	1.1	1.5	1	1	1	3.8	2.4	1.4	1.2	1.4	1.9	1.4	1.3	4.1	2.7	2	1.5	1.6	1	1.1	1	2.2	5.3	1	1.4	1.5
S22	PleasantHumans_anger	34	female	100	376.5	10	2.25	3.5	11	15	19	13	5.5	4.1	4.9	1.1	1.8	1	1	1	5.1	3.6	3.6	1.1	1.5	1	1	1	3.8	2.4	1.4	1.2	1.4	1.9	1.4	1.3	4.1	2.7	2	1.5	1.6	1	1.1	1	2.2	5.3	1	1.4	1.5
S22	PleasantHumans_surprise	34	female	100	376.5	10	2.25	3.5	11	15	19	13	5.5	4.1	4.9	1.1	1.8	1	1	1	5.1	3.6	3.6	1.1	1.5	1	1	1	3.8	2.4	1.4	1.2	1.4	1.9	1.4	1.3	4.1	2.7	2	1.5	1.6	1	1.1	1	2.2	5.3	1	1.4	1.5
S22	NeutralDogs_arousal	34	female	100	376.5	10	2.25	3.5	11	15	19	13	5.5	4.1	4.9	1.1	1.8	1	1	1	5.1	3.6	3.6	1.1	1.5	1	1	1	3.8	2.4	1.4	1.2	1.4	1.9	1.4	1.3	4.1	2.7	2	1.5	1.6	1	1.1	1	2.2	5.3	1	1.4	1.5
S22	NeutralDogs_happiness	34	female	100	376.5	10	2.25	3.5	11	15	19	13	5.5	4.1	4.9	1.1	1.8	1	1	1	5.1	3.6	3.6	1.1	1.5	1	1	1	3.8	2.4	1.4	1.2	1.4	1.9	1.4	1.3	4.1	2.7	2	1.5	1.6	1	1.1	1	2.2	5.3	1	1.4	1.5
S22	NeutralDogs_disgust	34	female	100	376.5	10	2.25	3.5	11	15	19	13	5.5	4.1	4.9	1.1	1.8	1	1	1	5.1	3.6	3.6	1.1	1.5	1	1	1	3.8	2.4	1.4	1.2	1.4	1.9	1.4	1.3	4.1	2.7	2	1.5	1.6	1	1.1	1	2.2	5.3	1	1.4	1.5
S22	NeutralDogs_fear	34	female	100	376.5	10	2.25	3.5	11	15	19	13	5.5	4.1	4.9	1.1	1.8	1	1	1	5.1	3.6	3.6	1.1	1.5	1	1	1	3.8	2.4	1.4	1.2	1.4	1.9	1.4	1.3	4.1	2.7	2	1.5	1.6	1	1.1	1	2.2	5.3	1	1.4	1.5
S22	NeutralDogs_sadness	34	female	100	376.5	10	2.25	3.5	11	15	19	13	5.5	4.1	4.9	1.1	1.8	1	1	1	5.1	3.6	3.6	1.1	1.5	1	1	1	3.8	2.4	1.4	1.2	1.4	1.9	1.4	1.3	4.1	2.7	2	1.5	1.6	1	1.1	1	2.2	5.3	1	1.4	1.5
S22	NeutralDogs_valence	34	female	100	376.5	10	2.25	3.5	11	15	19	13	5.5	4.1	4.9	1.1	1.8	1	1	1	5.1	3.6	3.6	1.1	1.5	1	1	1	3.8	2.4	1.4	1.2	1.4	1.9	1.4	1.3	4.1	2.7	2	1.5	1.6	1	1.1	1	2.2	5.3	1	1.4	1.5
S22	NeutralDogs_anger	34	female	100	376.5	10	2.25	3.5	11	15	19	13	5.5	4.1	4.9	1.1	1.8	1	1	1	5.1	3.6	3.6	1.1	1.5	1	1	1	3.8	2.4	1.4	1.2	1.4	1.9	1.4	1.3	4.1	2.7	2	1.5	1.6	1	1.1	1	2.2	5.3	1	1.4	1.5
S22	NeutralDogs_surprise	34	female	100	376.5	10	2.25	3.5	11	15	19	13	5.5	4.1	4.9	1.1	1.8	1	1	1	5.1	3.6	3.6	1.1	1.5	1	1	1	3.8	2.4	1.4	1.2	1.4	1.9	1.4	1.3	4.1	2.7	2	1.5	1.6	1	1.1	1	2.2	5.3	1	1.4	1.5
S22	NeutralHumans_arousal	34	female	100	376.5	10	2.25	3.5	11	15	19	13	5.5	4.1	4.9	1.1	1.8	1	1	1	5.1	3.6	3.6	1.1	1.5	1	1	1	3.8	2.4	1.4	1.2	1.4	1.9	1.4	1.3	4.1	2.7	2	1.5	1.6	1	1.1	1	2.2	5.3	1	1.4	1.5
S22	NeutralHumans_happiness	34	female	100	376.5	10	2.25	3.5	11	15	19	13	5.5	4.1	4.9	1.1	1.8	1	1	1	5.1	3.6	3.6	1.1	1.5	1	1	1	3.8	2.4	1.4	1.2	1.4	1.9	1.4	1.3	4.1	2.7	2	1.5	1.6	1	1.1	1	2.2	5.3	1	1.4	1.5
S22	NeutralHumans_disgust	34	female	100	376.5	10	2.25	3.5	11	15	19	13	5.5	4.1	4.9	1.1	1.8	1	1	1	5.1	3.6	3.6	1.1	1.5	1	1	1	3.8	2.4	1.4	1.2	1.4	1.9	1.4	1.3	4.1	2.7	2	1.5	1.6	1	1.1	1	2.2	5.3	1	1.4	1.5
S22	NeutralHumans_fear	34	female	100	376.5	10	2.25	3.5	11	15	19	13	5.5	4.1	4.9	1.1	1.8	1	1	1	5.1	3.6	3.6	1.1	1.5	1	1	1	3.8	2.4	1.4	1.2	1.4	1.9	1.4	1.3	4.1	2.7	2	1.5	1.6	1	1.1	1	2.2	5.3	1	1.4	1.5
S22	NeutralHumans_sadness	34	female	100	376.5	10	2.25	3.5	11	15	19	13	5.5	4.1	4.9	1.1	1.8	1	1	1	5.1	3.6	3.6	1.1	1.5	1	1	1	3.8	2.4	1.4	1.2	1.4	1.9	1.4	1.3	4.1	2.7	2	1.5	1.6	1	1.1	1	2.2	5.3	1	1.4	1.5
S22	NeutralHumans_valence	34	female	100	376.5	10	2.25	3.5	11	15	19	13	5.5	4.1	4.9	1.1	1.8	1	1	1	5.1	3.6	3.6	1.1	1.5	1	1	1	3.8	2.4	1.4	1.2	1.4	1.9	1.4	1.3	4.1	2.7	2	1.5	1.6	1	1.1	1	2.2	5.3	1	1.4	1.5
S22	NeutralHumans_anger	34	female	100	376.5	10	2.25	3.5	11	15	19	13	5.5	4.1	4.9	1.1	1.8	1	1	1	5.1	3.6	3.6	1.1	1.5	1	1	1	3.8	2.4	1.4	1.2	1.4	1.9	1.4	1.3	4.1	2.7	2	1.5	1.6	1	1.1	1	2.2	5.3	1	1.4	1.5
S22	NeutralHumans_surprise	34	female	100	376.5	10	2.25	3.5	11	15	19	13	5.5	4.1	4.9	1.1	1.8	1	1	1	5.1	3.6	3.6	1.1	1.5	1	1	1	3.8	2.4	1.4	1.2	1.4	1.9	1.4	1.3	4.1	2.7	2	1.5	1.6	1	1.1	1	2.2	5.3	1	1.4	1.5
S22	Object_arousal	34	female	100	376.5	10	2.25	3.5	11	15	19	13	5.5	4.1	4.9	1.1	1.8	1	1	1	5.1	3.6	3.6	1.1	1.5	1	1	1	3.8	2.4	1.4	1.2	1.4	1.9	1.4	1.3	4.1	2.7	2	1.5	1.6	1	1.1	1	2.2	5.3	1	1.4	1.5
S22	Object_happiness	34	female	100	376.5	10	2.25	3.5	11	15	19	13	5.5	4.1	4.9	1.1	1.8	1	1	1	5.1	3.6	3.6	1.1	1.5	1	1	1	3.8	2.4	1.4	1.2	1.4	1.9	1.4	1.3	4.1	2.7	2	1.5	1.6	1	1.1	1	2.2	5.3	1	1.4	1.5
S22	Object_disgust	34	female	100	376.5	10	2.25	3.5	11	15	19	13	5.5	4.1	4.9	1.1	1.8	1	1	1	5.1	3.6	3.6	1.1	1.5	1	1	1	3.8	2.4	1.4	1.2	1.4	1.9	1.4	1.3	4.1	2.7	2	1.5	1.6	1	1.1	1	2.2	5.3	1	1.4	1.5
S22	Object_fear	34	female	100	376.5	10	2.25	3.5	11	15	19	13	5.5	4.1	4.9	1.1	1.8	1	1	1	5.1	3.6	3.6	1.1	1.5	1	1	1	3.8	2.4	1.4	1.2	1.4	1.9	1.4	1.3	4.1	2.7	2	1.5	1.6	1	1.1	1	2.2	5.3	1	1.4	1.5
S22	Object_sadness	34	female	100	376.5	10	2.25	3.5	11	15	19	13	5.5	4.1	4.9	1.1	1.8	1	1	1	5.1	3.6	3.6	1.1	1.5	1	1	1	3.8	2.4	1.4	1.2	1.4	1.9	1.4	1.3	4.1	2.7	2	1.5	1.6	1	1.1	1	2.2	5.3	1	1.4	1.5
S22	Object_valence	34	female	100	376.5	10	2.25	3.5	11	15	19	13	5.5	4.1	4.9	1.1	1.8	1	1	1	5.1	3.6	3.6	1.1	1.5	1	1	1	3.8	2.4	1.4	1.2	1.4	1.9	1.4	1.3	4.1	2.7	2	1.5	1.6	1	1.1	1	2.2	5.3	1	1.4	1.5
S22	Object_anger	34	female	100	376.5	10	2.25	3.5	11	15	19	13	5.5	4.1	4.9	1.1	1.8	1	1	1	5.1	3.6	3.6	1.1	1.5	1	1	1	3.8	2.4	1.4	1.2	1.4	1.9	1.4	1.3	4.1	2.7	2	1.5	1.6	1	1.1	1	2.2	5.3	1	1.4	1.5
S22	Object_surprise	34	female	100	376.5	10	2.25	3.5	11	15	19	13	5.5	4.1	4.9	1.1	1.8	1	1	1	5.1	3.6	3.6	1.1	1.5	1	1	1	3.8	2.4	1.4	1.2	1.4	1.9	1.4	1.3	4.1	2.7	2	1.5	1.6	1	1.1	1	2.2	5.3	1	1.4	1.5
S22	Pixel_arousal	34	female	100	376.5	10	2.25	3.5	11	15	19	13	5.5	4.1	4.9	1.1	1.8	1	1	1	5.1	3.6	3.6	1.1	1.5	1	1	1	3.8	2.4	1.4	1.2	1.4	1.9	1.4	1.3	4.1	2.7	2	1.5	1.6	1	1.1	1	2.2	5.3	1	1.4	1.5
S22	Pixel_happiness	34	female	100	376.5	10	2.25	3.5	11	15	19	13	5.5	4.1	4.9	1.1	1.8	1	1	1	5.1	3.6	3.6	1.1	1.5	1	1	1	3.8	2.4	1.4	1.2	1.4	1.9	1.4	1.3	4.1	2.7	2	1.5	1.6	1	1.1	1	2.2	5.3	1	1.4	1.5
S22	Pixel_disgust	34	female	100	376.5	10	2.25	3.5	11	15	19	13	5.5	4.1	4.9	1.1	1.8	1	1	1	5.1	3.6	3.6	1.1	1.5	1	1	1	3.8	2.4	1.4	1.2	1.4	1.9	1.4	1.3	4.1	2.7	2	1.5	1.6	1	1.1	1	2.2	5.3	1	1.4	1.5
S22	Pixel_fear	34	female	100	376.5	10	2.25	3.5	11	15	19	13	5.5	4.1	4.9	1.1	1.8	1	1	1	5.1	3.6	3.6	1.1	1.5	1	1	1	3.8	2.4	1.4	1.2	1.4	1.9	1.4	1.3	4.1	2.7	2	1.5	1.6	1	1.1	1	2.2	5.3	1	1.4	1.5
S22	Pixel_sadness	34	female	100	376.5	10	2.25	3.5	11	15	19	13	5.5	4.1	4.9	1.1	1.8	1	1	1	5.1	3.6	3.6	1.1	1.5	1	1	1	3.8	2.4	1.4	1.2	1.4	1.9	1.4	1.3	4.1	2.7	2	1.5	1.6	1	1.1	1	2.2	5.3	1	1.4	1.5
S22	Pixel_valence	34	female	100	376.5	10	2.25	3.5	11	15	19	13	5.5	4.1	4.9	1.1	1.8	1	1	1	5.1	3.6	3.6	1.1	1.5	1	1	1	3.8	2.4	1.4	1.2	1.4	1.9	1.4	1.3	4.1	2.7	2	1.5	1.6	1	1.1	1	2.2	5.3	1	1.4	1.5
S22	Pixel_anger	34	female	100	376.5	10	2.25	3.5	11	15	19	13	5.5	4.1	4.9	1.1	1.8	1	1	1	5.1	3.6	3.6	1.1	1.5	1	1	1	3.8	2.4	1.4	1.2	1.4	1.9	1.4	1.3	4.1	2.7	2	1.5	1.6	1	1.1	1	2.2	5.3	1	1.4	1.5
S22	Pixel_surprise	34	female	100	376.5	10	2.25	3.5	11	15	19	13	5.5	4.1	4.9	1.1	1.8	1	1	1	5.1	3.6	3.6	1.1	1.5	1	1	1	3.8	2.4	1.4	1.2	1.4	1.9	1.4	1.3	4.1	2.7	2	1.5	1.6	1	1.1	1	2.2	5.3	1	1.4	1.5
S23	ThreateningDogs_arousal	35	male	70	132.5	0	2.25	3.88	17	15	11	14	5.6	3.6	4.7	1	1	1	1	1	5	3.1	3.4	1	1	1	1	1	3.6	2	1.1	1.3	1	1.5	1	1.1	3.2	3	1.1	2.4	1	1.2	1.4	1.3	3	3.9	1	1.2	1.1
S23	ThreateningDogs_happiness	35	male	70	132.5	0	2.25	3.88	17	15	11	14	5.6	3.6	4.7	1	1	1	1	1	5	3.1	3.4	1	1	1	1	1	3.6	2	1.1	1.3	1	1.5	1	1.1	3.2	3	1.1	2.4	1	1.2	1.4	1.3	3	3.9	1	1.2	1.1
S23	ThreateningDogs_disgust	35	male	70	132.5	0	2.25	3.88	17	15	11	14	5.6	3.6	4.7	1	1	1	1	1	5	3.1	3.4	1	1	1	1	1	3.6	2	1.1	1.3	1	1.5	1	1.1	3.2	3	1.1	2.4	1	1.2	1.4	1.3	3	3.9	1	1.2	1.1
S23	ThreateningDogs_fear	35	male	70	132.5	0	2.25	3.88	17	15	11	14	5.6	3.6	4.7	1	1	1	1	1	5	3.1	3.4	1	1	1	1	1	3.6	2	1.1	1.3	1	1.5	1	1.1	3.2	3	1.1	2.4	1	1.2	1.4	1.3	3	3.9	1	1.2	1.1
S23	ThreateningDogs_sadness	35	male	70	132.5	0	2.25	3.88	17	15	11	14	5.6	3.6	4.7	1	1	1	1	1	5	3.1	3.4	1	1	1	1	1	3.6	2	1.1	1.3	1	1.5	1	1.1	3.2	3	1.1	2.4	1	1.2	1.4	1.3	3	3.9	1	1.2	1.1
S23	ThreateningDogs_valence	35	male	70	132.5	0	2.25	3.88	17	15	11	14	5.6	3.6	4.7	1	1	1	1	1	5	3.1	3.4	1	1	1	1	1	3.6	2	1.1	1.3	1	1.5	1	1.1	3.2	3	1.1	2.4	1	1.2	1.4	1.3	3	3.9	1	1.2	1.1
S23	ThreateningDogs_anger	35	male	70	132.5	0	2.25	3.88	17	15	11	14	5.6	3.6	4.7	1	1	1	1	1	5	3.1	3.4	1	1	1	1	1	3.6	2	1.1	1.3	1	1.5	1	1.1	3.2	3	1.1	2.4	1	1.2	1.4	1.3	3	3.9	1	1.2	1.1
S23	ThreateningDogs_surprise	35	male	70	132.5	0	2.25	3.88	17	15	11	14	5.6	3.6	4.7	1	1	1	1	1	5	3.1	3.4	1	1	1	1	1	3.6	2	1.1	1.3	1	1.5	1	1.1	3.2	3	1.1	2.4	1	1.2	1.4	1.3	3	3.9	1	1.2	1.1
S23	ThreateningHumans_arousal	35	male	70	132.5	0	2.25	3.88	17	15	11	14	5.6	3.6	4.7	1	1	1	1	1	5	3.1	3.4	1	1	1	1	1	3.6	2	1.1	1.3	1	1.5	1	1.1	3.2	3	1.1	2.4	1	1.2	1.4	1.3	3	3.9	1	1.2	1.1
S23	ThreateningHumans_happiness	35	male	70	132.5	0	2.25	3.88	17	15	11	14	5.6	3.6	4.7	1	1	1	1	1	5	3.1	3.4	1	1	1	1	1	3.6	2	1.1	1.3	1	1.5	1	1.1	3.2	3	1.1	2.4	1	1.2	1.4	1.3	3	3.9	1	1.2	1.1
S23	ThreateningHumans_disgust	35	male	70	132.5	0	2.25	3.88	17	15	11	14	5.6	3.6	4.7	1	1	1	1	1	5	3.1	3.4	1	1	1	1	1	3.6	2	1.1	1.3	1	1.5	1	1.1	3.2	3	1.1	2.4	1	1.2	1.4	1.3	3	3.9	1	1.2	1.1
S23	ThreateningHumans_fear	35	male	70	132.5	0	2.25	3.88	17	15	11	14	5.6	3.6	4.7	1	1	1	1	1	5	3.1	3.4	1	1	1	1	1	3.6	2	1.1	1.3	1	1.5	1	1.1	3.2	3	1.1	2.4	1	1.2	1.4	1.3	3	3.9	1	1.2	1.1
S23	ThreateningHumans_sadness	35	male	70	132.5	0	2.25	3.88	17	15	11	14	5.6	3.6	4.7	1	1	1	1	1	5	3.1	3.4	1	1	1	1	1	3.6	2	1.1	1.3	1	1.5	1	1.1	3.2	3	1.1	2.4	1	1.2	1.4	1.3	3	3.9	1	1.2	1.1
S23	ThreateningHumans_valence	35	male	70	132.5	0	2.25	3.88	17	15	11	14	5.6	3.6	4.7	1	1	1	1	1	5	3.1	3.4	1	1	1	1	1	3.6	2	1.1	1.3	1	1.5	1	1.1	3.2	3	1.1	2.4	1	1.2	1.4	1.3	3	3.9	1	1.2	1.1
S23	ThreateningHumans_anger	35	male	70	132.5	0	2.25	3.88	17	15	11	14	5.6	3.6	4.7	1	1	1	1	1	5	3.1	3.4	1	1	1	1	1	3.6	2	1.1	1.3	1	1.5	1	1.1	3.2	3	1.1	2.4	1	1.2	1.4	1.3	3	3.9	1	1.2	1.1
S23	ThreateningHumans_surprise	35	male	70	132.5	0	2.25	3.88	17	15	11	14	5.6	3.6	4.7	1	1	1	1	1	5	3.1	3.4	1	1	1	1	1	3.6	2	1.1	1.3	1	1.5	1	1.1	3.2	3	1.1	2.4	1	1.2	1.4	1.3	3	3.9	1	1.2	1.1
S23	PleasantDogs_arousal	35	male	70	132.5	0	2.25	3.88	17	15	11	14	5.6	3.6	4.7	1	1	1	1	1	5	3.1	3.4	1	1	1	1	1	3.6	2	1.1	1.3	1	1.5	1	1.1	3.2	3	1.1	2.4	1	1.2	1.4	1.3	3	3.9	1	1.2	1.1
S23	PleasantDogs_happiness	35	male	70	132.5	0	2.25	3.88	17	15	11	14	5.6	3.6	4.7	1	1	1	1	1	5	3.1	3.4	1	1	1	1	1	3.6	2	1.1	1.3	1	1.5	1	1.1	3.2	3	1.1	2.4	1	1.2	1.4	1.3	3	3.9	1	1.2	1.1
S23	PleasantDogs_disgust	35	male	70	132.5	0	2.25	3.88	17	15	11	14	5.6	3.6	4.7	1	1	1	1	1	5	3.1	3.4	1	1	1	1	1	3.6	2	1.1	1.3	1	1.5	1	1.1	3.2	3	1.1	2.4	1	1.2	1.4	1.3	3	3.9	1	1.2	1.1
S23	PleasantDogs_fear	35	male	70	132.5	0	2.25	3.88	17	15	11	14	5.6	3.6	4.7	1	1	1	1	1	5	3.1	3.4	1	1	1	1	1	3.6	2	1.1	1.3	1	1.5	1	1.1	3.2	3	1.1	2.4	1	1.2	1.4	1.3	3	3.9	1	1.2	1.1
S23	PleasantDogs_sadness	35	male	70	132.5	0	2.25	3.88	17	15	11	14	5.6	3.6	4.7	1	1	1	1	1	5	3.1	3.4	1	1	1	1	1	3.6	2	1.1	1.3	1	1.5	1	1.1	3.2	3	1.1	2.4	1	1.2	1.4	1.3	3	3.9	1	1.2	1.1
S23	PleasantDogs_valence	35	male	70	132.5	0	2.25	3.88	17	15	11	14	5.6	3.6	4.7	1	1	1	1	1	5	3.1	3.4	1	1	1	1	1	3.6	2	1.1	1.3	1	1.5	1	1.1	3.2	3	1.1	2.4	1	1.2	1.4	1.3	3	3.9	1	1.2	1.1
S23	PleasantDogs_anger	35	male	70	132.5	0	2.25	3.88	17	15	11	14	5.6	3.6	4.7	1	1	1	1	1	5	3.1	3.4	1	1	1	1	1	3.6	2	1.1	1.3	1	1.5	1	1.1	3.2	3	1.1	2.4	1	1.2	1.4	1.3	3	3.9	1	1.2	1.1
S23	PleasantDogs_surprise	35	male	70	132.5	0	2.25	3.88	17	15	11	14	5.6	3.6	4.7	1	1	1	1	1	5	3.1	3.4	1	1	1	1	1	3.6	2	1.1	1.3	1	1.5	1	1.1	3.2	3	1.1	2.4	1	1.2	1.4	1.3	3	3.9	1	1.2	1.1
S23	PleasantHumans_arousal	35	male	70	132.5	0	2.25	3.88	17	15	11	14	5.6	3.6	4.7	1	1	1	1	1	5	3.1	3.4	1	1	1	1	1	3.6	2	1.1	1.3	1	1.5	1	1.1	3.2	3	1.1	2.4	1	1.2	1.4	1.3	3	3.9	1	1.2	1.1
S23	PleasantHumans_happiness	35	male	70	132.5	0	2.25	3.88	17	15	11	14	5.6	3.6	4.7	1	1	1	1	1	5	3.1	3.4	1	1	1	1	1	3.6	2	1.1	1.3	1	1.5	1	1.1	3.2	3	1.1	2.4	1	1.2	1.4	1.3	3	3.9	1	1.2	1.1
S23	PleasantHumans_disgust	35	male	70	132.5	0	2.25	3.88	17	15	11	14	5.6	3.6	4.7	1	1	1	1	1	5	3.1	3.4	1	1	1	1	1	3.6	2	1.1	1.3	1	1.5	1	1.1	3.2	3	1.1	2.4	1	1.2	1.4	1.3	3	3.9	1	1.2	1.1
S23	PleasantHumans_fear	35	male	70	132.5	0	2.25	3.88	17	15	11	14	5.6	3.6	4.7	1	1	1	1	1	5	3.1	3.4	1	1	1	1	1	3.6	2	1.1	1.3	1	1.5	1	1.1	3.2	3	1.1	2.4	1	1.2	1.4	1.3	3	3.9	1	1.2	1.1
S23	PleasantHumans_sadness	35	male	70	132.5	0	2.25	3.88	17	15	11	14	5.6	3.6	4.7	1	1	1	1	1	5	3.1	3.4	1	1	1	1	1	3.6	2	1.1	1.3	1	1.5	1	1.1	3.2	3	1.1	2.4	1	1.2	1.4	1.3	3	3.9	1	1.2	1.1
S23	PleasantHumans_valence	35	male	70	132.5	0	2.25	3.88	17	15	11	14	5.6	3.6	4.7	1	1	1	1	1	5	3.1	3.4	1	1	1	1	1	3.6	2	1.1	1.3	1	1.5	1	1.1	3.2	3	1.1	2.4	1	1.2	1.4	1.3	3	3.9	1	1.2	1.1
S23	PleasantHumans_anger	35	male	70	132.5	0	2.25	3.88	17	15	11	14	5.6	3.6	4.7	1	1	1	1	1	5	3.1	3.4	1	1	1	1	1	3.6	2	1.1	1.3	1	1.5	1	1.1	3.2	3	1.1	2.4	1	1.2	1.4	1.3	3	3.9	1	1.2	1.1
S23	PleasantHumans_surprise	35	male	70	132.5	0	2.25	3.88	17	15	11	14	5.6	3.6	4.7	1	1	1	1	1	5	3.1	3.4	1	1	1	1	1	3.6	2	1.1	1.3	1	1.5	1	1.1	3.2	3	1.1	2.4	1	1.2	1.4	1.3	3	3.9	1	1.2	1.1
S23	NeutralDogs_arousal	35	male	70	132.5	0	2.25	3.88	17	15	11	14	5.6	3.6	4.7	1	1	1	1	1	5	3.1	3.4	1	1	1	1	1	3.6	2	1.1	1.3	1	1.5	1	1.1	3.2	3	1.1	2.4	1	1.2	1.4	1.3	3	3.9	1	1.2	1.1
S23	NeutralDogs_happiness	35	male	70	132.5	0	2.25	3.88	17	15	11	14	5.6	3.6	4.7	1	1	1	1	1	5	3.1	3.4	1	1	1	1	1	3.6	2	1.1	1.3	1	1.5	1	1.1	3.2	3	1.1	2.4	1	1.2	1.4	1.3	3	3.9	1	1.2	1.1
S23	NeutralDogs_disgust	35	male	70	132.5	0	2.25	3.88	17	15	11	14	5.6	3.6	4.7	1	1	1	1	1	5	3.1	3.4	1	1	1	1	1	3.6	2	1.1	1.3	1	1.5	1	1.1	3.2	3	1.1	2.4	1	1.2	1.4	1.3	3	3.9	1	1.2	1.1
S23	NeutralDogs_fear	35	male	70	132.5	0	2.25	3.88	17	15	11	14	5.6	3.6	4.7	1	1	1	1	1	5	3.1	3.4	1	1	1	1	1	3.6	2	1.1	1.3	1	1.5	1	1.1	3.2	3	1.1	2.4	1	1.2	1.4	1.3	3	3.9	1	1.2	1.1
S23	NeutralDogs_sadness	35	male	70	132.5	0	2.25	3.88	17	15	11	14	5.6	3.6	4.7	1	1	1	1	1	5	3.1	3.4	1	1	1	1	1	3.6	2	1.1	1.3	1	1.5	1	1.1	3.2	3	1.1	2.4	1	1.2	1.4	1.3	3	3.9	1	1.2	1.1
S23	NeutralDogs_valence	35	male	70	132.5	0	2.25	3.88	17	15	11	14	5.6	3.6	4.7	1	1	1	1	1	5	3.1	3.4	1	1	1	1	1	3.6	2	1.1	1.3	1	1.5	1	1.1	3.2	3	1.1	2.4	1	1.2	1.4	1.3	3	3.9	1	1.2	1.1
S23	NeutralDogs_anger	35	male	70	132.5	0	2.25	3.88	17	15	11	14	5.6	3.6	4.7	1	1	1	1	1	5	3.1	3.4	1	1	1	1	1	3.6	2	1.1	1.3	1	1.5	1	1.1	3.2	3	1.1	2.4	1	1.2	1.4	1.3	3	3.9	1	1.2	1.1
S23	NeutralDogs_surprise	35	male	70	132.5	0	2.25	3.88	17	15	11	14	5.6	3.6	4.7	1	1	1	1	1	5	3.1	3.4	1	1	1	1	1	3.6	2	1.1	1.3	1	1.5	1	1.1	3.2	3	1.1	2.4	1	1.2	1.4	1.3	3	3.9	1	1.2	1.1
S23	NeutralHumans_arousal	35	male	70	132.5	0	2.25	3.88	17	15	11	14	5.6	3.6	4.7	1	1	1	1	1	5	3.1	3.4	1	1	1	1	1	3.6	2	1.1	1.3	1	1.5	1	1.1	3.2	3	1.1	2.4	1	1.2	1.4	1.3	3	3.9	1	1.2	1.1
S23	NeutralHumans_happiness	35	male	70	132.5	0	2.25	3.88	17	15	11	14	5.6	3.6	4.7	1	1	1	1	1	5	3.1	3.4	1	1	1	1	1	3.6	2	1.1	1.3	1	1.5	1	1.1	3.2	3	1.1	2.4	1	1.2	1.4	1.3	3	3.9	1	1.2	1.1
S23	NeutralHumans_disgust	35	male	70	132.5	0	2.25	3.88	17	15	11	14	5.6	3.6	4.7	1	1	1	1	1	5	3.1	3.4	1	1	1	1	1	3.6	2	1.1	1.3	1	1.5	1	1.1	3.2	3	1.1	2.4	1	1.2	1.4	1.3	3	3.9	1	1.2	1.1
S23	NeutralHumans_fear	35	male	70	132.5	0	2.25	3.88	17	15	11	14	5.6	3.6	4.7	1	1	1	1	1	5	3.1	3.4	1	1	1	1	1	3.6	2	1.1	1.3	1	1.5	1	1.1	3.2	3	1.1	2.4	1	1.2	1.4	1.3	3	3.9	1	1.2	1.1
S23	NeutralHumans_sadness	35	male	70	132.5	0	2.25	3.88	17	15	11	14	5.6	3.6	4.7	1	1	1	1	1	5	3.1	3.4	1	1	1	1	1	3.6	2	1.1	1.3	1	1.5	1	1.1	3.2	3	1.1	2.4	1	1.2	1.4	1.3	3	3.9	1	1.2	1.1
S23	NeutralHumans_valence	35	male	70	132.5	0	2.25	3.88	17	15	11	14	5.6	3.6	4.7	1	1	1	1	1	5	3.1	3.4	1	1	1	1	1	3.6	2	1.1	1.3	1	1.5	1	1.1	3.2	3	1.1	2.4	1	1.2	1.4	1.3	3	3.9	1	1.2	1.1
S23	NeutralHumans_anger	35	male	70	132.5	0	2.25	3.88	17	15	11	14	5.6	3.6	4.7	1	1	1	1	1	5	3.1	3.4	1	1	1	1	1	3.6	2	1.1	1.3	1	1.5	1	1.1	3.2	3	1.1	2.4	1	1.2	1.4	1.3	3	3.9	1	1.2	1.1
S23	NeutralHumans_surprise	35	male	70	132.5	0	2.25	3.88	17	15	11	14	5.6	3.6	4.7	1	1	1	1	1	5	3.1	3.4	1	1	1	1	1	3.6	2	1.1	1.3	1	1.5	1	1.1	3.2	3	1.1	2.4	1	1.2	1.4	1.3	3	3.9	1	1.2	1.1
S23	Object_arousal	35	male	70	132.5	0	2.25	3.88	17	15	11	14	5.6	3.6	4.7	1	1	1	1	1	5	3.1	3.4	1	1	1	1	1	3.6	2	1.1	1.3	1	1.5	1	1.1	3.2	3	1.1	2.4	1	1.2	1.4	1.3	3	3.9	1	1.2	1.1
S23	Object_happiness	35	male	70	132.5	0	2.25	3.88	17	15	11	14	5.6	3.6	4.7	1	1	1	1	1	5	3.1	3.4	1	1	1	1	1	3.6	2	1.1	1.3	1	1.5	1	1.1	3.2	3	1.1	2.4	1	1.2	1.4	1.3	3	3.9	1	1.2	1.1
S23	Object_disgust	35	male	70	132.5	0	2.25	3.88	17	15	11	14	5.6	3.6	4.7	1	1	1	1	1	5	3.1	3.4	1	1	1	1	1	3.6	2	1.1	1.3	1	1.5	1	1.1	3.2	3	1.1	2.4	1	1.2	1.4	1.3	3	3.9	1	1.2	1.1
S23	Object_fear	35	male	70	132.5	0	2.25	3.88	17	15	11	14	5.6	3.6	4.7	1	1	1	1	1	5	3.1	3.4	1	1	1	1	1	3.6	2	1.1	1.3	1	1.5	1	1.1	3.2	3	1.1	2.4	1	1.2	1.4	1.3	3	3.9	1	1.2	1.1
S23	Object_sadness	35	male	70	132.5	0	2.25	3.88	17	15	11	14	5.6	3.6	4.7	1	1	1	1	1	5	3.1	3.4	1	1	1	1	1	3.6	2	1.1	1.3	1	1.5	1	1.1	3.2	3	1.1	2.4	1	1.2	1.4	1.3	3	3.9	1	1.2	1.1
S23	Object_valence	35	male	70	132.5	0	2.25	3.88	17	15	11	14	5.6	3.6	4.7	1	1	1	1	1	5	3.1	3.4	1	1	1	1	1	3.6	2	1.1	1.3	1	1.5	1	1.1	3.2	3	1.1	2.4	1	1.2	1.4	1.3	3	3.9	1	1.2	1.1
S23	Object_anger	35	male	70	132.5	0	2.25	3.88	17	15	11	14	5.6	3.6	4.7	1	1	1	1	1	5	3.1	3.4	1	1	1	1	1	3.6	2	1.1	1.3	1	1.5	1	1.1	3.2	3	1.1	2.4	1	1.2	1.4	1.3	3	3.9	1	1.2	1.1
S23	Object_surprise	35	male	70	132.5	0	2.25	3.88	17	15	11	14	5.6	3.6	4.7	1	1	1	1	1	5	3.1	3.4	1	1	1	1	1	3.6	2	1.1	1.3	1	1.5	1	1.1	3.2	3	1.1	2.4	1	1.2	1.4	1.3	3	3.9	1	1.2	1.1
S23	Pixel_arousal	35	male	70	132.5	0	2.25	3.88	17	15	11	14	5.6	3.6	4.7	1	1	1	1	1	5	3.1	3.4	1	1	1	1	1	3.6	2	1.1	1.3	1	1.5	1	1.1	3.2	3	1.1	2.4	1	1.2	1.4	1.3	3	3.9	1	1.2	1.1
S23	Pixel_happiness	35	male	70	132.5	0	2.25	3.88	17	15	11	14	5.6	3.6	4.7	1	1	1	1	1	5	3.1	3.4	1	1	1	1	1	3.6	2	1.1	1.3	1	1.5	1	1.1	3.2	3	1.1	2.4	1	1.2	1.4	1.3	3	3.9	1	1.2	1.1
S23	Pixel_disgust	35	male	70	132.5	0	2.25	3.88	17	15	11	14	5.6	3.6	4.7	1	1	1	1	1	5	3.1	3.4	1	1	1	1	1	3.6	2	1.1	1.3	1	1.5	1	1.1	3.2	3	1.1	2.4	1	1.2	1.4	1.3	3	3.9	1	1.2	1.1
S23	Pixel_fear	35	male	70	132.5	0	2.25	3.88	17	15	11	14	5.6	3.6	4.7	1	1	1	1	1	5	3.1	3.4	1	1	1	1	1	3.6	2	1.1	1.3	1	1.5	1	1.1	3.2	3	1.1	2.4	1	1.2	1.4	1.3	3	3.9	1	1.2	1.1
S23	Pixel_sadness	35	male	70	132.5	0	2.25	3.88	17	15	11	14	5.6	3.6	4.7	1	1	1	1	1	5	3.1	3.4	1	1	1	1	1	3.6	2	1.1	1.3	1	1.5	1	1.1	3.2	3	1.1	2.4	1	1.2	1.4	1.3	3	3.9	1	1.2	1.1
S23	Pixel_valence	35	male	70	132.5	0	2.25	3.88	17	15	11	14	5.6	3.6	4.7	1	1	1	1	1	5	3.1	3.4	1	1	1	1	1	3.6	2	1.1	1.3	1	1.5	1	1.1	3.2	3	1.1	2.4	1	1.2	1.4	1.3	3	3.9	1	1.2	1.1
S23	Pixel_anger	35	male	70	132.5	0	2.25	3.88	17	15	11	14	5.6	3.6	4.7	1	1	1	1	1	5	3.1	3.4	1	1	1	1	1	3.6	2	1.1	1.3	1	1.5	1	1.1	3.2	3	1.1	2.4	1	1.2	1.4	1.3	3	3.9	1	1.2	1.1
S23	Pixel_surprise	35	male	70	132.5	0	2.25	3.88	17	15	11	14	5.6	3.6	4.7	1	1	1	1	1	5	3.1	3.4	1	1	1	1	1	3.6	2	1.1	1.3	1	1.5	1	1.1	3.2	3	1.1	2.4	1	1.2	1.4	1.3	3	3.9	1	1.2	1.1
S24	ThreateningDogs_arousal	40	male	70	137	4	4.38	3.25	17	12	14	14	5.6	4.4	4.8	1	1.6	1	1	1	4.5	2.2	2.2	1.3	1.2	1	1	1	4	1.3	1	1.7	1	1.6	1	1.2	3.8	1.5	1.3	1.9	1.1	1.1	1	1.4	3.3	4.7	1.6	1.7	1.1
S24	ThreateningDogs_happiness	40	male	70	137	4	4.38	3.25	17	12	14	14	5.6	4.4	4.8	1	1.6	1	1	1	4.5	2.2	2.2	1.3	1.2	1	1	1	4	1.3	1	1.7	1	1.6	1	1.2	3.8	1.5	1.3	1.9	1.1	1.1	1	1.4	3.3	4.7	1.6	1.7	1.1
S24	ThreateningDogs_disgust	40	male	70	137	4	4.38	3.25	17	12	14	14	5.6	4.4	4.8	1	1.6	1	1	1	4.5	2.2	2.2	1.3	1.2	1	1	1	4	1.3	1	1.7	1	1.6	1	1.2	3.8	1.5	1.3	1.9	1.1	1.1	1	1.4	3.3	4.7	1.6	1.7	1.1
S24	ThreateningDogs_fear	40	male	70	137	4	4.38	3.25	17	12	14	14	5.6	4.4	4.8	1	1.6	1	1	1	4.5	2.2	2.2	1.3	1.2	1	1	1	4	1.3	1	1.7	1	1.6	1	1.2	3.8	1.5	1.3	1.9	1.1	1.1	1	1.4	3.3	4.7	1.6	1.7	1.1
S24	ThreateningDogs_sadness	40	male	70	137	4	4.38	3.25	17	12	14	14	5.6	4.4	4.8	1	1.6	1	1	1	4.5	2.2	2.2	1.3	1.2	1	1	1	4	1.3	1	1.7	1	1.6	1	1.2	3.8	1.5	1.3	1.9	1.1	1.1	1	1.4	3.3	4.7	1.6	1.7	1.1
S24	ThreateningDogs_valence	40	male	70	137	4	4.38	3.25	17	12	14	14	5.6	4.4	4.8	1	1.6	1	1	1	4.5	2.2	2.2	1.3	1.2	1	1	1	4	1.3	1	1.7	1	1.6	1	1.2	3.8	1.5	1.3	1.9	1.1	1.1	1	1.4	3.3	4.7	1.6	1.7	1.1
S24	ThreateningDogs_anger	40	male	70	137	4	4.38	3.25	17	12	14	14	5.6	4.4	4.8	1	1.6	1	1	1	4.5	2.2	2.2	1.3	1.2	1	1	1	4	1.3	1	1.7	1	1.6	1	1.2	3.8	1.5	1.3	1.9	1.1	1.1	1	1.4	3.3	4.7	1.6	1.7	1.1
S24	ThreateningDogs_surprise	40	male	70	137	4	4.38	3.25	17	12	14	14	5.6	4.4	4.8	1	1.6	1	1	1	4.5	2.2	2.2	1.3	1.2	1	1	1	4	1.3	1	1.7	1	1.6	1	1.2	3.8	1.5	1.3	1.9	1.1	1.1	1	1.4	3.3	4.7	1.6	1.7	1.1
S24	ThreateningHumans_arousal	40	male	70	137	4	4.38	3.25	17	12	14	14	5.6	4.4	4.8	1	1.6	1	1	1	4.5	2.2	2.2	1.3	1.2	1	1	1	4	1.3	1	1.7	1	1.6	1	1.2	3.8	1.5	1.3	1.9	1.1	1.1	1	1.4	3.3	4.7	1.6	1.7	1.1
S24	ThreateningHumans_happiness	40	male	70	137	4	4.38	3.25	17	12	14	14	5.6	4.4	4.8	1	1.6	1	1	1	4.5	2.2	2.2	1.3	1.2	1	1	1	4	1.3	1	1.7	1	1.6	1	1.2	3.8	1.5	1.3	1.9	1.1	1.1	1	1.4	3.3	4.7	1.6	1.7	1.1
S24	ThreateningHumans_disgust	40	male	70	137	4	4.38	3.25	17	12	14	14	5.6	4.4	4.8	1	1.6	1	1	1	4.5	2.2	2.2	1.3	1.2	1	1	1	4	1.3	1	1.7	1	1.6	1	1.2	3.8	1.5	1.3	1.9	1.1	1.1	1	1.4	3.3	4.7	1.6	1.7	1.1
S24	ThreateningHumans_fear	40	male	70	137	4	4.38	3.25	17	12	14	14	5.6	4.4	4.8	1	1.6	1	1	1	4.5	2.2	2.2	1.3	1.2	1	1	1	4	1.3	1	1.7	1	1.6	1	1.2	3.8	1.5	1.3	1.9	1.1	1.1	1	1.4	3.3	4.7	1.6	1.7	1.1
S24	ThreateningHumans_sadness	40	male	70	137	4	4.38	3.25	17	12	14	14	5.6	4.4	4.8	1	1.6	1	1	1	4.5	2.2	2.2	1.3	1.2	1	1	1	4	1.3	1	1.7	1	1.6	1	1.2	3.8	1.5	1.3	1.9	1.1	1.1	1	1.4	3.3	4.7	1.6	1.7	1.1
S24	ThreateningHumans_valence	40	male	70	137	4	4.38	3.25	17	12	14	14	5.6	4.4	4.8	1	1.6	1	1	1	4.5	2.2	2.2	1.3	1.2	1	1	1	4	1.3	1	1.7	1	1.6	1	1.2	3.8	1.5	1.3	1.9	1.1	1.1	1	1.4	3.3	4.7	1.6	1.7	1.1
S24	ThreateningHumans_anger	40	male	70	137	4	4.38	3.25	17	12	14	14	5.6	4.4	4.8	1	1.6	1	1	1	4.5	2.2	2.2	1.3	1.2	1	1	1	4	1.3	1	1.7	1	1.6	1	1.2	3.8	1.5	1.3	1.9	1.1	1.1	1	1.4	3.3	4.7	1.6	1.7	1.1
S24	ThreateningHumans_surprise	40	male	70	137	4	4.38	3.25	17	12	14	14	5.6	4.4	4.8	1	1.6	1	1	1	4.5	2.2	2.2	1.3	1.2	1	1	1	4	1.3	1	1.7	1	1.6	1	1.2	3.8	1.5	1.3	1.9	1.1	1.1	1	1.4	3.3	4.7	1.6	1.7	1.1
S24	PleasantDogs_arousal	40	male	70	137	4	4.38	3.25	17	12	14	14	5.6	4.4	4.8	1	1.6	1	1	1	4.5	2.2	2.2	1.3	1.2	1	1	1	4	1.3	1	1.7	1	1.6	1	1.2	3.8	1.5	1.3	1.9	1.1	1.1	1	1.4	3.3	4.7	1.6	1.7	1.1
S24	PleasantDogs_happiness	40	male	70	137	4	4.38	3.25	17	12	14	14	5.6	4.4	4.8	1	1.6	1	1	1	4.5	2.2	2.2	1.3	1.2	1	1	1	4	1.3	1	1.7	1	1.6	1	1.2	3.8	1.5	1.3	1.9	1.1	1.1	1	1.4	3.3	4.7	1.6	1.7	1.1
S24	PleasantDogs_disgust	40	male	70	137	4	4.38	3.25	17	12	14	14	5.6	4.4	4.8	1	1.6	1	1	1	4.5	2.2	2.2	1.3	1.2	1	1	1	4	1.3	1	1.7	1	1.6	1	1.2	3.8	1.5	1.3	1.9	1.1	1.1	1	1.4	3.3	4.7	1.6	1.7	1.1
S24	PleasantDogs_fear	40	male	70	137	4	4.38	3.25	17	12	14	14	5.6	4.4	4.8	1	1.6	1	1	1	4.5	2.2	2.2	1.3	1.2	1	1	1	4	1.3	1	1.7	1	1.6	1	1.2	3.8	1.5	1.3	1.9	1.1	1.1	1	1.4	3.3	4.7	1.6	1.7	1.1
S24	PleasantDogs_sadness	40	male	70	137	4	4.38	3.25	17	12	14	14	5.6	4.4	4.8	1	1.6	1	1	1	4.5	2.2	2.2	1.3	1.2	1	1	1	4	1.3	1	1.7	1	1.6	1	1.2	3.8	1.5	1.3	1.9	1.1	1.1	1	1.4	3.3	4.7	1.6	1.7	1.1
S24	PleasantDogs_valence	40	male	70	137	4	4.38	3.25	17	12	14	14	5.6	4.4	4.8	1	1.6	1	1	1	4.5	2.2	2.2	1.3	1.2	1	1	1	4	1.3	1	1.7	1	1.6	1	1.2	3.8	1.5	1.3	1.9	1.1	1.1	1	1.4	3.3	4.7	1.6	1.7	1.1
S24	PleasantDogs_anger	40	male	70	137	4	4.38	3.25	17	12	14	14	5.6	4.4	4.8	1	1.6	1	1	1	4.5	2.2	2.2	1.3	1.2	1	1	1	4	1.3	1	1.7	1	1.6	1	1.2	3.8	1.5	1.3	1.9	1.1	1.1	1	1.4	3.3	4.7	1.6	1.7	1.1
S24	PleasantDogs_surprise	40	male	70	137	4	4.38	3.25	17	12	14	14	5.6	4.4	4.8	1	1.6	1	1	1	4.5	2.2	2.2	1.3	1.2	1	1	1	4	1.3	1	1.7	1	1.6	1	1.2	3.8	1.5	1.3	1.9	1.1	1.1	1	1.4	3.3	4.7	1.6	1.7	1.1
S24	PleasantHumans_arousal	40	male	70	137	4	4.38	3.25	17	12	14	14	5.6	4.4	4.8	1	1.6	1	1	1	4.5	2.2	2.2	1.3	1.2	1	1	1	4	1.3	1	1.7	1	1.6	1	1.2	3.8	1.5	1.3	1.9	1.1	1.1	1	1.4	3.3	4.7	1.6	1.7	1.1
S24	PleasantHumans_happiness	40	male	70	137	4	4.38	3.25	17	12	14	14	5.6	4.4	4.8	1	1.6	1	1	1	4.5	2.2	2.2	1.3	1.2	1	1	1	4	1.3	1	1.7	1	1.6	1	1.2	3.8	1.5	1.3	1.9	1.1	1.1	1	1.4	3.3	4.7	1.6	1.7	1.1
S24	PleasantHumans_disgust	40	male	70	137	4	4.38	3.25	17	12	14	14	5.6	4.4	4.8	1	1.6	1	1	1	4.5	2.2	2.2	1.3	1.2	1	1	1	4	1.3	1	1.7	1	1.6	1	1.2	3.8	1.5	1.3	1.9	1.1	1.1	1	1.4	3.3	4.7	1.6	1.7	1.1
S24	PleasantHumans_fear	40	male	70	137	4	4.38	3.25	17	12	14	14	5.6	4.4	4.8	1	1.6	1	1	1	4.5	2.2	2.2	1.3	1.2	1	1	1	4	1.3	1	1.7	1	1.6	1	1.2	3.8	1.5	1.3	1.9	1.1	1.1	1	1.4	3.3	4.7	1.6	1.7	1.1
S24	PleasantHumans_sadness	40	male	70	137	4	4.38	3.25	17	12	14	14	5.6	4.4	4.8	1	1.6	1	1	1	4.5	2.2	2.2	1.3	1.2	1	1	1	4	1.3	1	1.7	1	1.6	1	1.2	3.8	1.5	1.3	1.9	1.1	1.1	1	1.4	3.3	4.7	1.6	1.7	1.1
S24	PleasantHumans_valence	40	male	70	137	4	4.38	3.25	17	12	14	14	5.6	4.4	4.8	1	1.6	1	1	1	4.5	2.2	2.2	1.3	1.2	1	1	1	4	1.3	1	1.7	1	1.6	1	1.2	3.8	1.5	1.3	1.9	1.1	1.1	1	1.4	3.3	4.7	1.6	1.7	1.1
S24	PleasantHumans_anger	40	male	70	137	4	4.38	3.25	17	12	14	14	5.6	4.4	4.8	1	1.6	1	1	1	4.5	2.2	2.2	1.3	1.2	1	1	1	4	1.3	1	1.7	1	1.6	1	1.2	3.8	1.5	1.3	1.9	1.1	1.1	1	1.4	3.3	4.7	1.6	1.7	1.1
S24	PleasantHumans_surprise	40	male	70	137	4	4.38	3.25	17	12	14	14	5.6	4.4	4.8	1	1.6	1	1	1	4.5	2.2	2.2	1.3	1.2	1	1	1	4	1.3	1	1.7	1	1.6	1	1.2	3.8	1.5	1.3	1.9	1.1	1.1	1	1.4	3.3	4.7	1.6	1.7	1.1
S24	NeutralDogs_arousal	40	male	70	137	4	4.38	3.25	17	12	14	14	5.6	4.4	4.8	1	1.6	1	1	1	4.5	2.2	2.2	1.3	1.2	1	1	1	4	1.3	1	1.7	1	1.6	1	1.2	3.8	1.5	1.3	1.9	1.1	1.1	1	1.4	3.3	4.7	1.6	1.7	1.1
S24	NeutralDogs_happiness	40	male	70	137	4	4.38	3.25	17	12	14	14	5.6	4.4	4.8	1	1.6	1	1	1	4.5	2.2	2.2	1.3	1.2	1	1	1	4	1.3	1	1.7	1	1.6	1	1.2	3.8	1.5	1.3	1.9	1.1	1.1	1	1.4	3.3	4.7	1.6	1.7	1.1
S24	NeutralDogs_disgust	40	male	70	137	4	4.38	3.25	17	12	14	14	5.6	4.4	4.8	1	1.6	1	1	1	4.5	2.2	2.2	1.3	1.2	1	1	1	4	1.3	1	1.7	1	1.6	1	1.2	3.8	1.5	1.3	1.9	1.1	1.1	1	1.4	3.3	4.7	1.6	1.7	1.1
S24	NeutralDogs_fear	40	male	70	137	4	4.38	3.25	17	12	14	14	5.6	4.4	4.8	1	1.6	1	1	1	4.5	2.2	2.2	1.3	1.2	1	1	1	4	1.3	1	1.7	1	1.6	1	1.2	3.8	1.5	1.3	1.9	1.1	1.1	1	1.4	3.3	4.7	1.6	1.7	1.1
S24	NeutralDogs_sadness	40	male	70	137	4	4.38	3.25	17	12	14	14	5.6	4.4	4.8	1	1.6	1	1	1	4.5	2.2	2.2	1.3	1.2	1	1	1	4	1.3	1	1.7	1	1.6	1	1.2	3.8	1.5	1.3	1.9	1.1	1.1	1	1.4	3.3	4.7	1.6	1.7	1.1
S24	NeutralDogs_valence	40	male	70	137	4	4.38	3.25	17	12	14	14	5.6	4.4	4.8	1	1.6	1	1	1	4.5	2.2	2.2	1.3	1.2	1	1	1	4	1.3	1	1.7	1	1.6	1	1.2	3.8	1.5	1.3	1.9	1.1	1.1	1	1.4	3.3	4.7	1.6	1.7	1.1
S24	NeutralDogs_anger	40	male	70	137	4	4.38	3.25	17	12	14	14	5.6	4.4	4.8	1	1.6	1	1	1	4.5	2.2	2.2	1.3	1.2	1	1	1	4	1.3	1	1.7	1	1.6	1	1.2	3.8	1.5	1.3	1.9	1.1	1.1	1	1.4	3.3	4.7	1.6	1.7	1.1
S24	NeutralDogs_surprise	40	male	70	137	4	4.38	3.25	17	12	14	14	5.6	4.4	4.8	1	1.6	1	1	1	4.5	2.2	2.2	1.3	1.2	1	1	1	4	1.3	1	1.7	1	1.6	1	1.2	3.8	1.5	1.3	1.9	1.1	1.1	1	1.4	3.3	4.7	1.6	1.7	1.1
S24	NeutralHumans_arousal	40	male	70	137	4	4.38	3.25	17	12	14	14	5.6	4.4	4.8	1	1.6	1	1	1	4.5	2.2	2.2	1.3	1.2	1	1	1	4	1.3	1	1.7	1	1.6	1	1.2	3.8	1.5	1.3	1.9	1.1	1.1	1	1.4	3.3	4.7	1.6	1.7	1.1
S24	NeutralHumans_happiness	40	male	70	137	4	4.38	3.25	17	12	14	14	5.6	4.4	4.8	1	1.6	1	1	1	4.5	2.2	2.2	1.3	1.2	1	1	1	4	1.3	1	1.7	1	1.6	1	1.2	3.8	1.5	1.3	1.9	1.1	1.1	1	1.4	3.3	4.7	1.6	1.7	1.1
S24	NeutralHumans_disgust	40	male	70	137	4	4.38	3.25	17	12	14	14	5.6	4.4	4.8	1	1.6	1	1	1	4.5	2.2	2.2	1.3	1.2	1	1	1	4	1.3	1	1.7	1	1.6	1	1.2	3.8	1.5	1.3	1.9	1.1	1.1	1	1.4	3.3	4.7	1.6	1.7	1.1
S24	NeutralHumans_fear	40	male	70	137	4	4.38	3.25	17	12	14	14	5.6	4.4	4.8	1	1.6	1	1	1	4.5	2.2	2.2	1.3	1.2	1	1	1	4	1.3	1	1.7	1	1.6	1	1.2	3.8	1.5	1.3	1.9	1.1	1.1	1	1.4	3.3	4.7	1.6	1.7	1.1
S24	NeutralHumans_sadness	40	male	70	137	4	4.38	3.25	17	12	14	14	5.6	4.4	4.8	1	1.6	1	1	1	4.5	2.2	2.2	1.3	1.2	1	1	1	4	1.3	1	1.7	1	1.6	1	1.2	3.8	1.5	1.3	1.9	1.1	1.1	1	1.4	3.3	4.7	1.6	1.7	1.1
S24	NeutralHumans_valence	40	male	70	137	4	4.38	3.25	17	12	14	14	5.6	4.4	4.8	1	1.6	1	1	1	4.5	2.2	2.2	1.3	1.2	1	1	1	4	1.3	1	1.7	1	1.6	1	1.2	3.8	1.5	1.3	1.9	1.1	1.1	1	1.4	3.3	4.7	1.6	1.7	1.1
S24	NeutralHumans_anger	40	male	70	137	4	4.38	3.25	17	12	14	14	5.6	4.4	4.8	1	1.6	1	1	1	4.5	2.2	2.2	1.3	1.2	1	1	1	4	1.3	1	1.7	1	1.6	1	1.2	3.8	1.5	1.3	1.9	1.1	1.1	1	1.4	3.3	4.7	1.6	1.7	1.1
S24	NeutralHumans_surprise	40	male	70	137	4	4.38	3.25	17	12	14	14	5.6	4.4	4.8	1	1.6	1	1	1	4.5	2.2	2.2	1.3	1.2	1	1	1	4	1.3	1	1.7	1	1.6	1	1.2	3.8	1.5	1.3	1.9	1.1	1.1	1	1.4	3.3	4.7	1.6	1.7	1.1
S24	Object_arousal	40	male	70	137	4	4.38	3.25	17	12	14	14	5.6	4.4	4.8	1	1.6	1	1	1	4.5	2.2	2.2	1.3	1.2	1	1	1	4	1.3	1	1.7	1	1.6	1	1.2	3.8	1.5	1.3	1.9	1.1	1.1	1	1.4	3.3	4.7	1.6	1.7	1.1
S24	Object_happiness	40	male	70	137	4	4.38	3.25	17	12	14	14	5.6	4.4	4.8	1	1.6	1	1	1	4.5	2.2	2.2	1.3	1.2	1	1	1	4	1.3	1	1.7	1	1.6	1	1.2	3.8	1.5	1.3	1.9	1.1	1.1	1	1.4	3.3	4.7	1.6	1.7	1.1
S24	Object_disgust	40	male	70	137	4	4.38	3.25	17	12	14	14	5.6	4.4	4.8	1	1.6	1	1	1	4.5	2.2	2.2	1.3	1.2	1	1	1	4	1.3	1	1.7	1	1.6	1	1.2	3.8	1.5	1.3	1.9	1.1	1.1	1	1.4	3.3	4.7	1.6	1.7	1.1
S24	Object_fear	40	male	70	137	4	4.38	3.25	17	12	14	14	5.6	4.4	4.8	1	1.6	1	1	1	4.5	2.2	2.2	1.3	1.2	1	1	1	4	1.3	1	1.7	1	1.6	1	1.2	3.8	1.5	1.3	1.9	1.1	1.1	1	1.4	3.3	4.7	1.6	1.7	1.1
S24	Object_sadness	40	male	70	137	4	4.38	3.25	17	12	14	14	5.6	4.4	4.8	1	1.6	1	1	1	4.5	2.2	2.2	1.3	1.2	1	1	1	4	1.3	1	1.7	1	1.6	1	1.2	3.8	1.5	1.3	1.9	1.1	1.1	1	1.4	3.3	4.7	1.6	1.7	1.1
S24	Object_valence	40	male	70	137	4	4.38	3.25	17	12	14	14	5.6	4.4	4.8	1	1.6	1	1	1	4.5	2.2	2.2	1.3	1.2	1	1	1	4	1.3	1	1.7	1	1.6	1	1.2	3.8	1.5	1.3	1.9	1.1	1.1	1	1.4	3.3	4.7	1.6	1.7	1.1
S24	Object_anger	40	male	70	137	4	4.38	3.25	17	12	14	14	5.6	4.4	4.8	1	1.6	1	1	1	4.5	2.2	2.2	1.3	1.2	1	1	1	4	1.3	1	1.7	1	1.6	1	1.2	3.8	1.5	1.3	1.9	1.1	1.1	1	1.4	3.3	4.7	1.6	1.7	1.1
S24	Object_surprise	40	male	70	137	4	4.38	3.25	17	12	14	14	5.6	4.4	4.8	1	1.6	1	1	1	4.5	2.2	2.2	1.3	1.2	1	1	1	4	1.3	1	1.7	1	1.6	1	1.2	3.8	1.5	1.3	1.9	1.1	1.1	1	1.4	3.3	4.7	1.6	1.7	1.1
S24	Pixel_arousal	40	male	70	137	4	4.38	3.25	17	12	14	14	5.6	4.4	4.8	1	1.6	1	1	1	4.5	2.2	2.2	1.3	1.2	1	1	1	4	1.3	1	1.7	1	1.6	1	1.2	3.8	1.5	1.3	1.9	1.1	1.1	1	1.4	3.3	4.7	1.6	1.7	1.1
S24	Pixel_happiness	40	male	70	137	4	4.38	3.25	17	12	14	14	5.6	4.4	4.8	1	1.6	1	1	1	4.5	2.2	2.2	1.3	1.2	1	1	1	4	1.3	1	1.7	1	1.6	1	1.2	3.8	1.5	1.3	1.9	1.1	1.1	1	1.4	3.3	4.7	1.6	1.7	1.1
S24	Pixel_disgust	40	male	70	137	4	4.38	3.25	17	12	14	14	5.6	4.4	4.8	1	1.6	1	1	1	4.5	2.2	2.2	1.3	1.2	1	1	1	4	1.3	1	1.7	1	1.6	1	1.2	3.8	1.5	1.3	1.9	1.1	1.1	1	1.4	3.3	4.7	1.6	1.7	1.1
S24	Pixel_fear	40	male	70	137	4	4.38	3.25	17	12	14	14	5.6	4.4	4.8	1	1.6	1	1	1	4.5	2.2	2.2	1.3	1.2	1	1	1	4	1.3	1	1.7	1	1.6	1	1.2	3.8	1.5	1.3	1.9	1.1	1.1	1	1.4	3.3	4.7	1.6	1.7	1.1
S24	Pixel_sadness	40	male	70	137	4	4.38	3.25	17	12	14	14	5.6	4.4	4.8	1	1.6	1	1	1	4.5	2.2	2.2	1.3	1.2	1	1	1	4	1.3	1	1.7	1	1.6	1	1.2	3.8	1.5	1.3	1.9	1.1	1.1	1	1.4	3.3	4.7	1.6	1.7	1.1
S24	Pixel_valence	40	male	70	137	4	4.38	3.25	17	12	14	14	5.6	4.4	4.8	1	1.6	1	1	1	4.5	2.2	2.2	1.3	1.2	1	1	1	4	1.3	1	1.7	1	1.6	1	1.2	3.8	1.5	1.3	1.9	1.1	1.1	1	1.4	3.3	4.7	1.6	1.7	1.1
S24	Pixel_anger	40	male	70	137	4	4.38	3.25	17	12	14	14	5.6	4.4	4.8	1	1.6	1	1	1	4.5	2.2	2.2	1.3	1.2	1	1	1	4	1.3	1	1.7	1	1.6	1	1.2	3.8	1.5	1.3	1.9	1.1	1.1	1	1.4	3.3	4.7	1.6	1.7	1.1
S24	Pixel_surprise	40	male	70	137	4	4.38	3.25	17	12	14	14	5.6	4.4	4.8	1	1.6	1	1	1	4.5	2.2	2.2	1.3	1.2	1	1	1	4	1.3	1	1.7	1	1.6	1	1.2	3.8	1.5	1.3	1.9	1.1	1.1	1	1.4	3.3	4.7	1.6	1.7	1.1
S25	ThreateningDogs_arousal	46	female	100	471.5	1	3.88	2.25	19	18	27	21	5.4	5.1	5.6	1.8	3.2	1.2	1.1	1.2	4.8	5	3.7	2	3.8	1.4	2.5	1.2	3.9	4.4	2.1	3.3	1.9	3.5	2.6	2.5	3.2	5.9	2.1	3.6	3	3.9	3.9	2.1	3.1	5.1	1.7	3.4	2.9
S25	ThreateningDogs_happiness	46	female	100	471.5	1	3.88	2.25	19	18	27	21	5.4	5.1	5.6	1.8	3.2	1.2	1.1	1.2	4.8	5	3.7	2	3.8	1.4	2.5	1.2	3.9	4.4	2.1	3.3	1.9	3.5	2.6	2.5	3.2	5.9	2.1	3.6	3	3.9	3.9	2.1	3.1	5.1	1.7	3.4	2.9
S25	ThreateningDogs_disgust	46	female	100	471.5	1	3.88	2.25	19	18	27	21	5.4	5.1	5.6	1.8	3.2	1.2	1.1	1.2	4.8	5	3.7	2	3.8	1.4	2.5	1.2	3.9	4.4	2.1	3.3	1.9	3.5	2.6	2.5	3.2	5.9	2.1	3.6	3	3.9	3.9	2.1	3.1	5.1	1.7	3.4	2.9
S25	ThreateningDogs_fear	46	female	100	471.5	1	3.88	2.25	19	18	27	21	5.4	5.1	5.6	1.8	3.2	1.2	1.1	1.2	4.8	5	3.7	2	3.8	1.4	2.5	1.2	3.9	4.4	2.1	3.3	1.9	3.5	2.6	2.5	3.2	5.9	2.1	3.6	3	3.9	3.9	2.1	3.1	5.1	1.7	3.4	2.9
S25	ThreateningDogs_sadness	46	female	100	471.5	1	3.88	2.25	19	18	27	21	5.4	5.1	5.6	1.8	3.2	1.2	1.1	1.2	4.8	5	3.7	2	3.8	1.4	2.5	1.2	3.9	4.4	2.1	3.3	1.9	3.5	2.6	2.5	3.2	5.9	2.1	3.6	3	3.9	3.9	2.1	3.1	5.1	1.7	3.4	2.9
S25	ThreateningDogs_valence	46	female	100	471.5	1	3.88	2.25	19	18	27	21	5.4	5.1	5.6	1.8	3.2	1.2	1.1	1.2	4.8	5	3.7	2	3.8	1.4	2.5	1.2	3.9	4.4	2.1	3.3	1.9	3.5	2.6	2.5	3.2	5.9	2.1	3.6	3	3.9	3.9	2.1	3.1	5.1	1.7	3.4	2.9
S25	ThreateningDogs_anger	46	female	100	471.5	1	3.88	2.25	19	18	27	21	5.4	5.1	5.6	1.8	3.2	1.2	1.1	1.2	4.8	5	3.7	2	3.8	1.4	2.5	1.2	3.9	4.4	2.1	3.3	1.9	3.5	2.6	2.5	3.2	5.9	2.1	3.6	3	3.9	3.9	2.1	3.1	5.1	1.7	3.4	2.9
S25	ThreateningDogs_surprise	46	female	100	471.5	1	3.88	2.25	19	18	27	21	5.4	5.1	5.6	1.8	3.2	1.2	1.1	1.2	4.8	5	3.7	2	3.8	1.4	2.5	1.2	3.9	4.4	2.1	3.3	1.9	3.5	2.6	2.5	3.2	5.9	2.1	3.6	3	3.9	3.9	2.1	3.1	5.1	1.7	3.4	2.9
S25	ThreateningHumans_arousal	46	female	100	471.5	1	3.88	2.25	19	18	27	21	5.4	5.1	5.6	1.8	3.2	1.2	1.1	1.2	4.8	5	3.7	2	3.8	1.4	2.5	1.2	3.9	4.4	2.1	3.3	1.9	3.5	2.6	2.5	3.2	5.9	2.1	3.6	3	3.9	3.9	2.1	3.1	5.1	1.7	3.4	2.9
S25	ThreateningHumans_happiness	46	female	100	471.5	1	3.88	2.25	19	18	27	21	5.4	5.1	5.6	1.8	3.2	1.2	1.1	1.2	4.8	5	3.7	2	3.8	1.4	2.5	1.2	3.9	4.4	2.1	3.3	1.9	3.5	2.6	2.5	3.2	5.9	2.1	3.6	3	3.9	3.9	2.1	3.1	5.1	1.7	3.4	2.9
S25	ThreateningHumans_disgust	46	female	100	471.5	1	3.88	2.25	19	18	27	21	5.4	5.1	5.6	1.8	3.2	1.2	1.1	1.2	4.8	5	3.7	2	3.8	1.4	2.5	1.2	3.9	4.4	2.1	3.3	1.9	3.5	2.6	2.5	3.2	5.9	2.1	3.6	3	3.9	3.9	2.1	3.1	5.1	1.7	3.4	2.9
S25	ThreateningHumans_fear	46	female	100	471.5	1	3.88	2.25	19	18	27	21	5.4	5.1	5.6	1.8	3.2	1.2	1.1	1.2	4.8	5	3.7	2	3.8	1.4	2.5	1.2	3.9	4.4	2.1	3.3	1.9	3.5	2.6	2.5	3.2	5.9	2.1	3.6	3	3.9	3.9	2.1	3.1	5.1	1.7	3.4	2.9
S25	ThreateningHumans_sadness	46	female	100	471.5	1	3.88	2.25	19	18	27	21	5.4	5.1	5.6	1.8	3.2	1.2	1.1	1.2	4.8	5	3.7	2	3.8	1.4	2.5	1.2	3.9	4.4	2.1	3.3	1.9	3.5	2.6	2.5	3.2	5.9	2.1	3.6	3	3.9	3.9	2.1	3.1	5.1	1.7	3.4	2.9
S25	ThreateningHumans_valence	46	female	100	471.5	1	3.88	2.25	19	18	27	21	5.4	5.1	5.6	1.8	3.2	1.2	1.1	1.2	4.8	5	3.7	2	3.8	1.4	2.5	1.2	3.9	4.4	2.1	3.3	1.9	3.5	2.6	2.5	3.2	5.9	2.1	3.6	3	3.9	3.9	2.1	3.1	5.1	1.7	3.4	2.9
S25	ThreateningHumans_anger	46	female	100	471.5	1	3.88	2.25	19	18	27	21	5.4	5.1	5.6	1.8	3.2	1.2	1.1	1.2	4.8	5	3.7	2	3.8	1.4	2.5	1.2	3.9	4.4	2.1	3.3	1.9	3.5	2.6	2.5	3.2	5.9	2.1	3.6	3	3.9	3.9	2.1	3.1	5.1	1.7	3.4	2.9
S25	ThreateningHumans_surprise	46	female	100	471.5	1	3.88	2.25	19	18	27	21	5.4	5.1	5.6	1.8	3.2	1.2	1.1	1.2	4.8	5	3.7	2	3.8	1.4	2.5	1.2	3.9	4.4	2.1	3.3	1.9	3.5	2.6	2.5	3.2	5.9	2.1	3.6	3	3.9	3.9	2.1	3.1	5.1	1.7	3.4	2.9
S25	PleasantDogs_arousal	46	female	100	471.5	1	3.88	2.25	19	18	27	21	5.4	5.1	5.6	1.8	3.2	1.2	1.1	1.2	4.8	5	3.7	2	3.8	1.4	2.5	1.2	3.9	4.4	2.1	3.3	1.9	3.5	2.6	2.5	3.2	5.9	2.1	3.6	3	3.9	3.9	2.1	3.1	5.1	1.7	3.4	2.9
S25	PleasantDogs_happiness	46	female	100	471.5	1	3.88	2.25	19	18	27	21	5.4	5.1	5.6	1.8	3.2	1.2	1.1	1.2	4.8	5	3.7	2	3.8	1.4	2.5	1.2	3.9	4.4	2.1	3.3	1.9	3.5	2.6	2.5	3.2	5.9	2.1	3.6	3	3.9	3.9	2.1	3.1	5.1	1.7	3.4	2.9
S25	PleasantDogs_disgust	46	female	100	471.5	1	3.88	2.25	19	18	27	21	5.4	5.1	5.6	1.8	3.2	1.2	1.1	1.2	4.8	5	3.7	2	3.8	1.4	2.5	1.2	3.9	4.4	2.1	3.3	1.9	3.5	2.6	2.5	3.2	5.9	2.1	3.6	3	3.9	3.9	2.1	3.1	5.1	1.7	3.4	2.9
S25	PleasantDogs_fear	46	female	100	471.5	1	3.88	2.25	19	18	27	21	5.4	5.1	5.6	1.8	3.2	1.2	1.1	1.2	4.8	5	3.7	2	3.8	1.4	2.5	1.2	3.9	4.4	2.1	3.3	1.9	3.5	2.6	2.5	3.2	5.9	2.1	3.6	3	3.9	3.9	2.1	3.1	5.1	1.7	3.4	2.9
S25	PleasantDogs_sadness	46	female	100	471.5	1	3.88	2.25	19	18	27	21	5.4	5.1	5.6	1.8	3.2	1.2	1.1	1.2	4.8	5	3.7	2	3.8	1.4	2.5	1.2	3.9	4.4	2.1	3.3	1.9	3.5	2.6	2.5	3.2	5.9	2.1	3.6	3	3.9	3.9	2.1	3.1	5.1	1.7	3.4	2.9
S25	PleasantDogs_valence	46	female	100	471.5	1	3.88	2.25	19	18	27	21	5.4	5.1	5.6	1.8	3.2	1.2	1.1	1.2	4.8	5	3.7	2	3.8	1.4	2.5	1.2	3.9	4.4	2.1	3.3	1.9	3.5	2.6	2.5	3.2	5.9	2.1	3.6	3	3.9	3.9	2.1	3.1	5.1	1.7	3.4	2.9
S25	PleasantDogs_anger	46	female	100	471.5	1	3.88	2.25	19	18	27	21	5.4	5.1	5.6	1.8	3.2	1.2	1.1	1.2	4.8	5	3.7	2	3.8	1.4	2.5	1.2	3.9	4.4	2.1	3.3	1.9	3.5	2.6	2.5	3.2	5.9	2.1	3.6	3	3.9	3.9	2.1	3.1	5.1	1.7	3.4	2.9
S25	PleasantDogs_surprise	46	female	100	471.5	1	3.88	2.25	19	18	27	21	5.4	5.1	5.6	1.8	3.2	1.2	1.1	1.2	4.8	5	3.7	2	3.8	1.4	2.5	1.2	3.9	4.4	2.1	3.3	1.9	3.5	2.6	2.5	3.2	5.9	2.1	3.6	3	3.9	3.9	2.1	3.1	5.1	1.7	3.4	2.9
S25	PleasantHumans_arousal	46	female	100	471.5	1	3.88	2.25	19	18	27	21	5.4	5.1	5.6	1.8	3.2	1.2	1.1	1.2	4.8	5	3.7	2	3.8	1.4	2.5	1.2	3.9	4.4	2.1	3.3	1.9	3.5	2.6	2.5	3.2	5.9	2.1	3.6	3	3.9	3.9	2.1	3.1	5.1	1.7	3.4	2.9
S25	PleasantHumans_happiness	46	female	100	471.5	1	3.88	2.25	19	18	27	21	5.4	5.1	5.6	1.8	3.2	1.2	1.1	1.2	4.8	5	3.7	2	3.8	1.4	2.5	1.2	3.9	4.4	2.1	3.3	1.9	3.5	2.6	2.5	3.2	5.9	2.1	3.6	3	3.9	3.9	2.1	3.1	5.1	1.7	3.4	2.9
S25	PleasantHumans_disgust	46	female	100	471.5	1	3.88	2.25	19	18	27	21	5.4	5.1	5.6	1.8	3.2	1.2	1.1	1.2	4.8	5	3.7	2	3.8	1.4	2.5	1.2	3.9	4.4	2.1	3.3	1.9	3.5	2.6	2.5	3.2	5.9	2.1	3.6	3	3.9	3.9	2.1	3.1	5.1	1.7	3.4	2.9
S25	PleasantHumans_fear	46	female	100	471.5	1	3.88	2.25	19	18	27	21	5.4	5.1	5.6	1.8	3.2	1.2	1.1	1.2	4.8	5	3.7	2	3.8	1.4	2.5	1.2	3.9	4.4	2.1	3.3	1.9	3.5	2.6	2.5	3.2	5.9	2.1	3.6	3	3.9	3.9	2.1	3.1	5.1	1.7	3.4	2.9
S25	PleasantHumans_sadness	46	female	100	471.5	1	3.88	2.25	19	18	27	21	5.4	5.1	5.6	1.8	3.2	1.2	1.1	1.2	4.8	5	3.7	2	3.8	1.4	2.5	1.2	3.9	4.4	2.1	3.3	1.9	3.5	2.6	2.5	3.2	5.9	2.1	3.6	3	3.9	3.9	2.1	3.1	5.1	1.7	3.4	2.9
S25	PleasantHumans_valence	46	female	100	471.5	1	3.88	2.25	19	18	27	21	5.4	5.1	5.6	1.8	3.2	1.2	1.1	1.2	4.8	5	3.7	2	3.8	1.4	2.5	1.2	3.9	4.4	2.1	3.3	1.9	3.5	2.6	2.5	3.2	5.9	2.1	3.6	3	3.9	3.9	2.1	3.1	5.1	1.7	3.4	2.9
S25	PleasantHumans_anger	46	female	100	471.5	1	3.88	2.25	19	18	27	21	5.4	5.1	5.6	1.8	3.2	1.2	1.1	1.2	4.8	5	3.7	2	3.8	1.4	2.5	1.2	3.9	4.4	2.1	3.3	1.9	3.5	2.6	2.5	3.2	5.9	2.1	3.6	3	3.9	3.9	2.1	3.1	5.1	1.7	3.4	2.9
S25	PleasantHumans_surprise	46	female	100	471.5	1	3.88	2.25	19	18	27	21	5.4	5.1	5.6	1.8	3.2	1.2	1.1	1.2	4.8	5	3.7	2	3.8	1.4	2.5	1.2	3.9	4.4	2.1	3.3	1.9	3.5	2.6	2.5	3.2	5.9	2.1	3.6	3	3.9	3.9	2.1	3.1	5.1	1.7	3.4	2.9
S25	NeutralDogs_arousal	46	female	100	471.5	1	3.88	2.25	19	18	27	21	5.4	5.1	5.6	1.8	3.2	1.2	1.1	1.2	4.8	5	3.7	2	3.8	1.4	2.5	1.2	3.9	4.4	2.1	3.3	1.9	3.5	2.6	2.5	3.2	5.9	2.1	3.6	3	3.9	3.9	2.1	3.1	5.1	1.7	3.4	2.9
S25	NeutralDogs_happiness	46	female	100	471.5	1	3.88	2.25	19	18	27	21	5.4	5.1	5.6	1.8	3.2	1.2	1.1	1.2	4.8	5	3.7	2	3.8	1.4	2.5	1.2	3.9	4.4	2.1	3.3	1.9	3.5	2.6	2.5	3.2	5.9	2.1	3.6	3	3.9	3.9	2.1	3.1	5.1	1.7	3.4	2.9
S25	NeutralDogs_disgust	46	female	100	471.5	1	3.88	2.25	19	18	27	21	5.4	5.1	5.6	1.8	3.2	1.2	1.1	1.2	4.8	5	3.7	2	3.8	1.4	2.5	1.2	3.9	4.4	2.1	3.3	1.9	3.5	2.6	2.5	3.2	5.9	2.1	3.6	3	3.9	3.9	2.1	3.1	5.1	1.7	3.4	2.9
S25	NeutralDogs_fear	46	female	100	471.5	1	3.88	2.25	19	18	27	21	5.4	5.1	5.6	1.8	3.2	1.2	1.1	1.2	4.8	5	3.7	2	3.8	1.4	2.5	1.2	3.9	4.4	2.1	3.3	1.9	3.5	2.6	2.5	3.2	5.9	2.1	3.6	3	3.9	3.9	2.1	3.1	5.1	1.7	3.4	2.9
S25	NeutralDogs_sadness	46	female	100	471.5	1	3.88	2.25	19	18	27	21	5.4	5.1	5.6	1.8	3.2	1.2	1.1	1.2	4.8	5	3.7	2	3.8	1.4	2.5	1.2	3.9	4.4	2.1	3.3	1.9	3.5	2.6	2.5	3.2	5.9	2.1	3.6	3	3.9	3.9	2.1	3.1	5.1	1.7	3.4	2.9
S25	NeutralDogs_valence	46	female	100	471.5	1	3.88	2.25	19	18	27	21	5.4	5.1	5.6	1.8	3.2	1.2	1.1	1.2	4.8	5	3.7	2	3.8	1.4	2.5	1.2	3.9	4.4	2.1	3.3	1.9	3.5	2.6	2.5	3.2	5.9	2.1	3.6	3	3.9	3.9	2.1	3.1	5.1	1.7	3.4	2.9
S25	NeutralDogs_anger	46	female	100	471.5	1	3.88	2.25	19	18	27	21	5.4	5.1	5.6	1.8	3.2	1.2	1.1	1.2	4.8	5	3.7	2	3.8	1.4	2.5	1.2	3.9	4.4	2.1	3.3	1.9	3.5	2.6	2.5	3.2	5.9	2.1	3.6	3	3.9	3.9	2.1	3.1	5.1	1.7	3.4	2.9
S25	NeutralDogs_surprise	46	female	100	471.5	1	3.88	2.25	19	18	27	21	5.4	5.1	5.6	1.8	3.2	1.2	1.1	1.2	4.8	5	3.7	2	3.8	1.4	2.5	1.2	3.9	4.4	2.1	3.3	1.9	3.5	2.6	2.5	3.2	5.9	2.1	3.6	3	3.9	3.9	2.1	3.1	5.1	1.7	3.4	2.9
S25	NeutralHumans_arousal	46	female	100	471.5	1	3.88	2.25	19	18	27	21	5.4	5.1	5.6	1.8	3.2	1.2	1.1	1.2	4.8	5	3.7	2	3.8	1.4	2.5	1.2	3.9	4.4	2.1	3.3	1.9	3.5	2.6	2.5	3.2	5.9	2.1	3.6	3	3.9	3.9	2.1	3.1	5.1	1.7	3.4	2.9
S25	NeutralHumans_happiness	46	female	100	471.5	1	3.88	2.25	19	18	27	21	5.4	5.1	5.6	1.8	3.2	1.2	1.1	1.2	4.8	5	3.7	2	3.8	1.4	2.5	1.2	3.9	4.4	2.1	3.3	1.9	3.5	2.6	2.5	3.2	5.9	2.1	3.6	3	3.9	3.9	2.1	3.1	5.1	1.7	3.4	2.9
S25	NeutralHumans_disgust	46	female	100	471.5	1	3.88	2.25	19	18	27	21	5.4	5.1	5.6	1.8	3.2	1.2	1.1	1.2	4.8	5	3.7	2	3.8	1.4	2.5	1.2	3.9	4.4	2.1	3.3	1.9	3.5	2.6	2.5	3.2	5.9	2.1	3.6	3	3.9	3.9	2.1	3.1	5.1	1.7	3.4	2.9
S25	NeutralHumans_fear	46	female	100	471.5	1	3.88	2.25	19	18	27	21	5.4	5.1	5.6	1.8	3.2	1.2	1.1	1.2	4.8	5	3.7	2	3.8	1.4	2.5	1.2	3.9	4.4	2.1	3.3	1.9	3.5	2.6	2.5	3.2	5.9	2.1	3.6	3	3.9	3.9	2.1	3.1	5.1	1.7	3.4	2.9
S25	NeutralHumans_sadness	46	female	100	471.5	1	3.88	2.25	19	18	27	21	5.4	5.1	5.6	1.8	3.2	1.2	1.1	1.2	4.8	5	3.7	2	3.8	1.4	2.5	1.2	3.9	4.4	2.1	3.3	1.9	3.5	2.6	2.5	3.2	5.9	2.1	3.6	3	3.9	3.9	2.1	3.1	5.1	1.7	3.4	2.9
S25	NeutralHumans_valence	46	female	100	471.5	1	3.88	2.25	19	18	27	21	5.4	5.1	5.6	1.8	3.2	1.2	1.1	1.2	4.8	5	3.7	2	3.8	1.4	2.5	1.2	3.9	4.4	2.1	3.3	1.9	3.5	2.6	2.5	3.2	5.9	2.1	3.6	3	3.9	3.9	2.1	3.1	5.1	1.7	3.4	2.9
S25	NeutralHumans_anger	46	female	100	471.5	1	3.88	2.25	19	18	27	21	5.4	5.1	5.6	1.8	3.2	1.2	1.1	1.2	4.8	5	3.7	2	3.8	1.4	2.5	1.2	3.9	4.4	2.1	3.3	1.9	3.5	2.6	2.5	3.2	5.9	2.1	3.6	3	3.9	3.9	2.1	3.1	5.1	1.7	3.4	2.9
S25	NeutralHumans_surprise	46	female	100	471.5	1	3.88	2.25	19	18	27	21	5.4	5.1	5.6	1.8	3.2	1.2	1.1	1.2	4.8	5	3.7	2	3.8	1.4	2.5	1.2	3.9	4.4	2.1	3.3	1.9	3.5	2.6	2.5	3.2	5.9	2.1	3.6	3	3.9	3.9	2.1	3.1	5.1	1.7	3.4	2.9
S25	Object_arousal	46	female	100	471.5	1	3.88	2.25	19	18	27	21	5.4	5.1	5.6	1.8	3.2	1.2	1.1	1.2	4.8	5	3.7	2	3.8	1.4	2.5	1.2	3.9	4.4	2.1	3.3	1.9	3.5	2.6	2.5	3.2	5.9	2.1	3.6	3	3.9	3.9	2.1	3.1	5.1	1.7	3.4	2.9
S25	Object_happiness	46	female	100	471.5	1	3.88	2.25	19	18	27	21	5.4	5.1	5.6	1.8	3.2	1.2	1.1	1.2	4.8	5	3.7	2	3.8	1.4	2.5	1.2	3.9	4.4	2.1	3.3	1.9	3.5	2.6	2.5	3.2	5.9	2.1	3.6	3	3.9	3.9	2.1	3.1	5.1	1.7	3.4	2.9
S25	Object_disgust	46	female	100	471.5	1	3.88	2.25	19	18	27	21	5.4	5.1	5.6	1.8	3.2	1.2	1.1	1.2	4.8	5	3.7	2	3.8	1.4	2.5	1.2	3.9	4.4	2.1	3.3	1.9	3.5	2.6	2.5	3.2	5.9	2.1	3.6	3	3.9	3.9	2.1	3.1	5.1	1.7	3.4	2.9
S25	Object_fear	46	female	100	471.5	1	3.88	2.25	19	18	27	21	5.4	5.1	5.6	1.8	3.2	1.2	1.1	1.2	4.8	5	3.7	2	3.8	1.4	2.5	1.2	3.9	4.4	2.1	3.3	1.9	3.5	2.6	2.5	3.2	5.9	2.1	3.6	3	3.9	3.9	2.1	3.1	5.1	1.7	3.4	2.9
S25	Object_sadness	46	female	100	471.5	1	3.88	2.25	19	18	27	21	5.4	5.1	5.6	1.8	3.2	1.2	1.1	1.2	4.8	5	3.7	2	3.8	1.4	2.5	1.2	3.9	4.4	2.1	3.3	1.9	3.5	2.6	2.5	3.2	5.9	2.1	3.6	3	3.9	3.9	2.1	3.1	5.1	1.7	3.4	2.9
S25	Object_valence	46	female	100	471.5	1	3.88	2.25	19	18	27	21	5.4	5.1	5.6	1.8	3.2	1.2	1.1	1.2	4.8	5	3.7	2	3.8	1.4	2.5	1.2	3.9	4.4	2.1	3.3	1.9	3.5	2.6	2.5	3.2	5.9	2.1	3.6	3	3.9	3.9	2.1	3.1	5.1	1.7	3.4	2.9
S25	Object_anger	46	female	100	471.5	1	3.88	2.25	19	18	27	21	5.4	5.1	5.6	1.8	3.2	1.2	1.1	1.2	4.8	5	3.7	2	3.8	1.4	2.5	1.2	3.9	4.4	2.1	3.3	1.9	3.5	2.6	2.5	3.2	5.9	2.1	3.6	3	3.9	3.9	2.1	3.1	5.1	1.7	3.4	2.9
S25	Object_surprise	46	female	100	471.5	1	3.88	2.25	19	18	27	21	5.4	5.1	5.6	1.8	3.2	1.2	1.1	1.2	4.8	5	3.7	2	3.8	1.4	2.5	1.2	3.9	4.4	2.1	3.3	1.9	3.5	2.6	2.5	3.2	5.9	2.1	3.6	3	3.9	3.9	2.1	3.1	5.1	1.7	3.4	2.9
S25	Pixel_arousal	46	female	100	471.5	1	3.88	2.25	19	18	27	21	5.4	5.1	5.6	1.8	3.2	1.2	1.1	1.2	4.8	5	3.7	2	3.8	1.4	2.5	1.2	3.9	4.4	2.1	3.3	1.9	3.5	2.6	2.5	3.2	5.9	2.1	3.6	3	3.9	3.9	2.1	3.1	5.1	1.7	3.4	2.9
S25	Pixel_happiness	46	female	100	471.5	1	3.88	2.25	19	18	27	21	5.4	5.1	5.6	1.8	3.2	1.2	1.1	1.2	4.8	5	3.7	2	3.8	1.4	2.5	1.2	3.9	4.4	2.1	3.3	1.9	3.5	2.6	2.5	3.2	5.9	2.1	3.6	3	3.9	3.9	2.1	3.1	5.1	1.7	3.4	2.9
S25	Pixel_disgust	46	female	100	471.5	1	3.88	2.25	19	18	27	21	5.4	5.1	5.6	1.8	3.2	1.2	1.1	1.2	4.8	5	3.7	2	3.8	1.4	2.5	1.2	3.9	4.4	2.1	3.3	1.9	3.5	2.6	2.5	3.2	5.9	2.1	3.6	3	3.9	3.9	2.1	3.1	5.1	1.7	3.4	2.9
S25	Pixel_fear	46	female	100	471.5	1	3.88	2.25	19	18	27	21	5.4	5.1	5.6	1.8	3.2	1.2	1.1	1.2	4.8	5	3.7	2	3.8	1.4	2.5	1.2	3.9	4.4	2.1	3.3	1.9	3.5	2.6	2.5	3.2	5.9	2.1	3.6	3	3.9	3.9	2.1	3.1	5.1	1.7	3.4	2.9
S25	Pixel_sadness	46	female	100	471.5	1	3.88	2.25	19	18	27	21	5.4	5.1	5.6	1.8	3.2	1.2	1.1	1.2	4.8	5	3.7	2	3.8	1.4	2.5	1.2	3.9	4.4	2.1	3.3	1.9	3.5	2.6	2.5	3.2	5.9	2.1	3.6	3	3.9	3.9	2.1	3.1	5.1	1.7	3.4	2.9
S25	Pixel_valence	46	female	100	471.5	1	3.88	2.25	19	18	27	21	5.4	5.1	5.6	1.8	3.2	1.2	1.1	1.2	4.8	5	3.7	2	3.8	1.4	2.5	1.2	3.9	4.4	2.1	3.3	1.9	3.5	2.6	2.5	3.2	5.9	2.1	3.6	3	3.9	3.9	2.1	3.1	5.1	1.7	3.4	2.9
S25	Pixel_anger	46	female	100	471.5	1	3.88	2.25	19	18	27	21	5.4	5.1	5.6	1.8	3.2	1.2	1.1	1.2	4.8	5	3.7	2	3.8	1.4	2.5	1.2	3.9	4.4	2.1	3.3	1.9	3.5	2.6	2.5	3.2	5.9	2.1	3.6	3	3.9	3.9	2.1	3.1	5.1	1.7	3.4	2.9
S25	Pixel_surprise	46	female	100	471.5	1	3.88	2.25	19	18	27	21	5.4	5.1	5.6	1.8	3.2	1.2	1.1	1.2	4.8	5	3.7	2	3.8	1.4	2.5	1.2	3.9	4.4	2.1	3.3	1.9	3.5	2.6	2.5	3.2	5.9	2.1	3.6	3	3.9	3.9	2.1	3.1	5.1	1.7	3.4	2.9
S26	ThreateningDogs_arousal	45	female	100	367	8	2.75	2.38	21	18	25	16	5.7	4.9	5.5	1	1.1	1	1	1	5.5	4	4.4	1.1	1.3	1	1	1	3.9	1.8	1.9	1.4	1	1	1.1	1	4	2	1.7	1.4	1.1	1	1	1	2.2	4.2	1	1.6	2.8
S26	ThreateningDogs_happiness	45	female	100	367	8	2.75	2.38	21	18	25	16	5.7	4.9	5.5	1	1.1	1	1	1	5.5	4	4.4	1.1	1.3	1	1	1	3.9	1.8	1.9	1.4	1	1	1.1	1	4	2	1.7	1.4	1.1	1	1	1	2.2	4.2	1	1.6	2.8
S26	ThreateningDogs_disgust	45	female	100	367	8	2.75	2.38	21	18	25	16	5.7	4.9	5.5	1	1.1	1	1	1	5.5	4	4.4	1.1	1.3	1	1	1	3.9	1.8	1.9	1.4	1	1	1.1	1	4	2	1.7	1.4	1.1	1	1	1	2.2	4.2	1	1.6	2.8
S26	ThreateningDogs_fear	45	female	100	367	8	2.75	2.38	21	18	25	16	5.7	4.9	5.5	1	1.1	1	1	1	5.5	4	4.4	1.1	1.3	1	1	1	3.9	1.8	1.9	1.4	1	1	1.1	1	4	2	1.7	1.4	1.1	1	1	1	2.2	4.2	1	1.6	2.8
S26	ThreateningDogs_sadness	45	female	100	367	8	2.75	2.38	21	18	25	16	5.7	4.9	5.5	1	1.1	1	1	1	5.5	4	4.4	1.1	1.3	1	1	1	3.9	1.8	1.9	1.4	1	1	1.1	1	4	2	1.7	1.4	1.1	1	1	1	2.2	4.2	1	1.6	2.8
S26	ThreateningDogs_valence	45	female	100	367	8	2.75	2.38	21	18	25	16	5.7	4.9	5.5	1	1.1	1	1	1	5.5	4	4.4	1.1	1.3	1	1	1	3.9	1.8	1.9	1.4	1	1	1.1	1	4	2	1.7	1.4	1.1	1	1	1	2.2	4.2	1	1.6	2.8
S26	ThreateningDogs_anger	45	female	100	367	8	2.75	2.38	21	18	25	16	5.7	4.9	5.5	1	1.1	1	1	1	5.5	4	4.4	1.1	1.3	1	1	1	3.9	1.8	1.9	1.4	1	1	1.1	1	4	2	1.7	1.4	1.1	1	1	1	2.2	4.2	1	1.6	2.8
S26	ThreateningDogs_surprise	45	female	100	367	8	2.75	2.38	21	18	25	16	5.7	4.9	5.5	1	1.1	1	1	1	5.5	4	4.4	1.1	1.3	1	1	1	3.9	1.8	1.9	1.4	1	1	1.1	1	4	2	1.7	1.4	1.1	1	1	1	2.2	4.2	1	1.6	2.8
S26	ThreateningHumans_arousal	45	female	100	367	8	2.75	2.38	21	18	25	16	5.7	4.9	5.5	1	1.1	1	1	1	5.5	4	4.4	1.1	1.3	1	1	1	3.9	1.8	1.9	1.4	1	1	1.1	1	4	2	1.7	1.4	1.1	1	1	1	2.2	4.2	1	1.6	2.8
S26	ThreateningHumans_happiness	45	female	100	367	8	2.75	2.38	21	18	25	16	5.7	4.9	5.5	1	1.1	1	1	1	5.5	4	4.4	1.1	1.3	1	1	1	3.9	1.8	1.9	1.4	1	1	1.1	1	4	2	1.7	1.4	1.1	1	1	1	2.2	4.2	1	1.6	2.8
S26	ThreateningHumans_disgust	45	female	100	367	8	2.75	2.38	21	18	25	16	5.7	4.9	5.5	1	1.1	1	1	1	5.5	4	4.4	1.1	1.3	1	1	1	3.9	1.8	1.9	1.4	1	1	1.1	1	4	2	1.7	1.4	1.1	1	1	1	2.2	4.2	1	1.6	2.8
S26	ThreateningHumans_fear	45	female	100	367	8	2.75	2.38	21	18	25	16	5.7	4.9	5.5	1	1.1	1	1	1	5.5	4	4.4	1.1	1.3	1	1	1	3.9	1.8	1.9	1.4	1	1	1.1	1	4	2	1.7	1.4	1.1	1	1	1	2.2	4.2	1	1.6	2.8
S26	ThreateningHumans_sadness	45	female	100	367	8	2.75	2.38	21	18	25	16	5.7	4.9	5.5	1	1.1	1	1	1	5.5	4	4.4	1.1	1.3	1	1	1	3.9	1.8	1.9	1.4	1	1	1.1	1	4	2	1.7	1.4	1.1	1	1	1	2.2	4.2	1	1.6	2.8
S26	ThreateningHumans_valence	45	female	100	367	8	2.75	2.38	21	18	25	16	5.7	4.9	5.5	1	1.1	1	1	1	5.5	4	4.4	1.1	1.3	1	1	1	3.9	1.8	1.9	1.4	1	1	1.1	1	4	2	1.7	1.4	1.1	1	1	1	2.2	4.2	1	1.6	2.8
S26	ThreateningHumans_anger	45	female	100	367	8	2.75	2.38	21	18	25	16	5.7	4.9	5.5	1	1.1	1	1	1	5.5	4	4.4	1.1	1.3	1	1	1	3.9	1.8	1.9	1.4	1	1	1.1	1	4	2	1.7	1.4	1.1	1	1	1	2.2	4.2	1	1.6	2.8
S26	ThreateningHumans_surprise	45	female	100	367	8	2.75	2.38	21	18	25	16	5.7	4.9	5.5	1	1.1	1	1	1	5.5	4	4.4	1.1	1.3	1	1	1	3.9	1.8	1.9	1.4	1	1	1.1	1	4	2	1.7	1.4	1.1	1	1	1	2.2	4.2	1	1.6	2.8
S26	PleasantDogs_arousal	45	female	100	367	8	2.75	2.38	21	18	25	16	5.7	4.9	5.5	1	1.1	1	1	1	5.5	4	4.4	1.1	1.3	1	1	1	3.9	1.8	1.9	1.4	1	1	1.1	1	4	2	1.7	1.4	1.1	1	1	1	2.2	4.2	1	1.6	2.8
S26	PleasantDogs_happiness	45	female	100	367	8	2.75	2.38	21	18	25	16	5.7	4.9	5.5	1	1.1	1	1	1	5.5	4	4.4	1.1	1.3	1	1	1	3.9	1.8	1.9	1.4	1	1	1.1	1	4	2	1.7	1.4	1.1	1	1	1	2.2	4.2	1	1.6	2.8
S26	PleasantDogs_disgust	45	female	100	367	8	2.75	2.38	21	18	25	16	5.7	4.9	5.5	1	1.1	1	1	1	5.5	4	4.4	1.1	1.3	1	1	1	3.9	1.8	1.9	1.4	1	1	1.1	1	4	2	1.7	1.4	1.1	1	1	1	2.2	4.2	1	1.6	2.8
S26	PleasantDogs_fear	45	female	100	367	8	2.75	2.38	21	18	25	16	5.7	4.9	5.5	1	1.1	1	1	1	5.5	4	4.4	1.1	1.3	1	1	1	3.9	1.8	1.9	1.4	1	1	1.1	1	4	2	1.7	1.4	1.1	1	1	1	2.2	4.2	1	1.6	2.8
S26	PleasantDogs_sadness	45	female	100	367	8	2.75	2.38	21	18	25	16	5.7	4.9	5.5	1	1.1	1	1	1	5.5	4	4.4	1.1	1.3	1	1	1	3.9	1.8	1.9	1.4	1	1	1.1	1	4	2	1.7	1.4	1.1	1	1	1	2.2	4.2	1	1.6	2.8
S26	PleasantDogs_valence	45	female	100	367	8	2.75	2.38	21	18	25	16	5.7	4.9	5.5	1	1.1	1	1	1	5.5	4	4.4	1.1	1.3	1	1	1	3.9	1.8	1.9	1.4	1	1	1.1	1	4	2	1.7	1.4	1.1	1	1	1	2.2	4.2	1	1.6	2.8
S26	PleasantDogs_anger	45	female	100	367	8	2.75	2.38	21	18	25	16	5.7	4.9	5.5	1	1.1	1	1	1	5.5	4	4.4	1.1	1.3	1	1	1	3.9	1.8	1.9	1.4	1	1	1.1	1	4	2	1.7	1.4	1.1	1	1	1	2.2	4.2	1	1.6	2.8
S26	PleasantDogs_surprise	45	female	100	367	8	2.75	2.38	21	18	25	16	5.7	4.9	5.5	1	1.1	1	1	1	5.5	4	4.4	1.1	1.3	1	1	1	3.9	1.8	1.9	1.4	1	1	1.1	1	4	2	1.7	1.4	1.1	1	1	1	2.2	4.2	1	1.6	2.8
S26	PleasantHumans_arousal	45	female	100	367	8	2.75	2.38	21	18	25	16	5.7	4.9	5.5	1	1.1	1	1	1	5.5	4	4.4	1.1	1.3	1	1	1	3.9	1.8	1.9	1.4	1	1	1.1	1	4	2	1.7	1.4	1.1	1	1	1	2.2	4.2	1	1.6	2.8
S26	PleasantHumans_happiness	45	female	100	367	8	2.75	2.38	21	18	25	16	5.7	4.9	5.5	1	1.1	1	1	1	5.5	4	4.4	1.1	1.3	1	1	1	3.9	1.8	1.9	1.4	1	1	1.1	1	4	2	1.7	1.4	1.1	1	1	1	2.2	4.2	1	1.6	2.8
S26	PleasantHumans_disgust	45	female	100	367	8	2.75	2.38	21	18	25	16	5.7	4.9	5.5	1	1.1	1	1	1	5.5	4	4.4	1.1	1.3	1	1	1	3.9	1.8	1.9	1.4	1	1	1.1	1	4	2	1.7	1.4	1.1	1	1	1	2.2	4.2	1	1.6	2.8
S26	PleasantHumans_fear	45	female	100	367	8	2.75	2.38	21	18	25	16	5.7	4.9	5.5	1	1.1	1	1	1	5.5	4	4.4	1.1	1.3	1	1	1	3.9	1.8	1.9	1.4	1	1	1.1	1	4	2	1.7	1.4	1.1	1	1	1	2.2	4.2	1	1.6	2.8
S26	PleasantHumans_sadness	45	female	100	367	8	2.75	2.38	21	18	25	16	5.7	4.9	5.5	1	1.1	1	1	1	5.5	4	4.4	1.1	1.3	1	1	1	3.9	1.8	1.9	1.4	1	1	1.1	1	4	2	1.7	1.4	1.1	1	1	1	2.2	4.2	1	1.6	2.8
S26	PleasantHumans_valence	45	female	100	367	8	2.75	2.38	21	18	25	16	5.7	4.9	5.5	1	1.1	1	1	1	5.5	4	4.4	1.1	1.3	1	1	1	3.9	1.8	1.9	1.4	1	1	1.1	1	4	2	1.7	1.4	1.1	1	1	1	2.2	4.2	1	1.6	2.8
S26	PleasantHumans_anger	45	female	100	367	8	2.75	2.38	21	18	25	16	5.7	4.9	5.5	1	1.1	1	1	1	5.5	4	4.4	1.1	1.3	1	1	1	3.9	1.8	1.9	1.4	1	1	1.1	1	4	2	1.7	1.4	1.1	1	1	1	2.2	4.2	1	1.6	2.8
S26	PleasantHumans_surprise	45	female	100	367	8	2.75	2.38	21	18	25	16	5.7	4.9	5.5	1	1.1	1	1	1	5.5	4	4.4	1.1	1.3	1	1	1	3.9	1.8	1.9	1.4	1	1	1.1	1	4	2	1.7	1.4	1.1	1	1	1	2.2	4.2	1	1.6	2.8
S26	NeutralDogs_arousal	45	female	100	367	8	2.75	2.38	21	18	25	16	5.7	4.9	5.5	1	1.1	1	1	1	5.5	4	4.4	1.1	1.3	1	1	1	3.9	1.8	1.9	1.4	1	1	1.1	1	4	2	1.7	1.4	1.1	1	1	1	2.2	4.2	1	1.6	2.8
S26	NeutralDogs_happiness	45	female	100	367	8	2.75	2.38	21	18	25	16	5.7	4.9	5.5	1	1.1	1	1	1	5.5	4	4.4	1.1	1.3	1	1	1	3.9	1.8	1.9	1.4	1	1	1.1	1	4	2	1.7	1.4	1.1	1	1	1	2.2	4.2	1	1.6	2.8
S26	NeutralDogs_disgust	45	female	100	367	8	2.75	2.38	21	18	25	16	5.7	4.9	5.5	1	1.1	1	1	1	5.5	4	4.4	1.1	1.3	1	1	1	3.9	1.8	1.9	1.4	1	1	1.1	1	4	2	1.7	1.4	1.1	1	1	1	2.2	4.2	1	1.6	2.8
S26	NeutralDogs_fear	45	female	100	367	8	2.75	2.38	21	18	25	16	5.7	4.9	5.5	1	1.1	1	1	1	5.5	4	4.4	1.1	1.3	1	1	1	3.9	1.8	1.9	1.4	1	1	1.1	1	4	2	1.7	1.4	1.1	1	1	1	2.2	4.2	1	1.6	2.8
S26	NeutralDogs_sadness	45	female	100	367	8	2.75	2.38	21	18	25	16	5.7	4.9	5.5	1	1.1	1	1	1	5.5	4	4.4	1.1	1.3	1	1	1	3.9	1.8	1.9	1.4	1	1	1.1	1	4	2	1.7	1.4	1.1	1	1	1	2.2	4.2	1	1.6	2.8
S26	NeutralDogs_valence	45	female	100	367	8	2.75	2.38	21	18	25	16	5.7	4.9	5.5	1	1.1	1	1	1	5.5	4	4.4	1.1	1.3	1	1	1	3.9	1.8	1.9	1.4	1	1	1.1	1	4	2	1.7	1.4	1.1	1	1	1	2.2	4.2	1	1.6	2.8
S26	NeutralDogs_anger	45	female	100	367	8	2.75	2.38	21	18	25	16	5.7	4.9	5.5	1	1.1	1	1	1	5.5	4	4.4	1.1	1.3	1	1	1	3.9	1.8	1.9	1.4	1	1	1.1	1	4	2	1.7	1.4	1.1	1	1	1	2.2	4.2	1	1.6	2.8
S26	NeutralDogs_surprise	45	female	100	367	8	2.75	2.38	21	18	25	16	5.7	4.9	5.5	1	1.1	1	1	1	5.5	4	4.4	1.1	1.3	1	1	1	3.9	1.8	1.9	1.4	1	1	1.1	1	4	2	1.7	1.4	1.1	1	1	1	2.2	4.2	1	1.6	2.8
S26	NeutralHumans_arousal	45	female	100	367	8	2.75	2.38	21	18	25	16	5.7	4.9	5.5	1	1.1	1	1	1	5.5	4	4.4	1.1	1.3	1	1	1	3.9	1.8	1.9	1.4	1	1	1.1	1	4	2	1.7	1.4	1.1	1	1	1	2.2	4.2	1	1.6	2.8
S26	NeutralHumans_happiness	45	female	100	367	8	2.75	2.38	21	18	25	16	5.7	4.9	5.5	1	1.1	1	1	1	5.5	4	4.4	1.1	1.3	1	1	1	3.9	1.8	1.9	1.4	1	1	1.1	1	4	2	1.7	1.4	1.1	1	1	1	2.2	4.2	1	1.6	2.8
S26	NeutralHumans_disgust	45	female	100	367	8	2.75	2.38	21	18	25	16	5.7	4.9	5.5	1	1.1	1	1	1	5.5	4	4.4	1.1	1.3	1	1	1	3.9	1.8	1.9	1.4	1	1	1.1	1	4	2	1.7	1.4	1.1	1	1	1	2.2	4.2	1	1.6	2.8
S26	NeutralHumans_fear	45	female	100	367	8	2.75	2.38	21	18	25	16	5.7	4.9	5.5	1	1.1	1	1	1	5.5	4	4.4	1.1	1.3	1	1	1	3.9	1.8	1.9	1.4	1	1	1.1	1	4	2	1.7	1.4	1.1	1	1	1	2.2	4.2	1	1.6	2.8
S26	NeutralHumans_sadness	45	female	100	367	8	2.75	2.38	21	18	25	16	5.7	4.9	5.5	1	1.1	1	1	1	5.5	4	4.4	1.1	1.3	1	1	1	3.9	1.8	1.9	1.4	1	1	1.1	1	4	2	1.7	1.4	1.1	1	1	1	2.2	4.2	1	1.6	2.8
S26	NeutralHumans_valence	45	female	100	367	8	2.75	2.38	21	18	25	16	5.7	4.9	5.5	1	1.1	1	1	1	5.5	4	4.4	1.1	1.3	1	1	1	3.9	1.8	1.9	1.4	1	1	1.1	1	4	2	1.7	1.4	1.1	1	1	1	2.2	4.2	1	1.6	2.8
S26	NeutralHumans_anger	45	female	100	367	8	2.75	2.38	21	18	25	16	5.7	4.9	5.5	1	1.1	1	1	1	5.5	4	4.4	1.1	1.3	1	1	1	3.9	1.8	1.9	1.4	1	1	1.1	1	4	2	1.7	1.4	1.1	1	1	1	2.2	4.2	1	1.6	2.8
S26	NeutralHumans_surprise	45	female	100	367	8	2.75	2.38	21	18	25	16	5.7	4.9	5.5	1	1.1	1	1	1	5.5	4	4.4	1.1	1.3	1	1	1	3.9	1.8	1.9	1.4	1	1	1.1	1	4	2	1.7	1.4	1.1	1	1	1	2.2	4.2	1	1.6	2.8
S26	Object_arousal	45	female	100	367	8	2.75	2.38	21	18	25	16	5.7	4.9	5.5	1	1.1	1	1	1	5.5	4	4.4	1.1	1.3	1	1	1	3.9	1.8	1.9	1.4	1	1	1.1	1	4	2	1.7	1.4	1.1	1	1	1	2.2	4.2	1	1.6	2.8
S26	Object_happiness	45	female	100	367	8	2.75	2.38	21	18	25	16	5.7	4.9	5.5	1	1.1	1	1	1	5.5	4	4.4	1.1	1.3	1	1	1	3.9	1.8	1.9	1.4	1	1	1.1	1	4	2	1.7	1.4	1.1	1	1	1	2.2	4.2	1	1.6	2.8
S26	Object_disgust	45	female	100	367	8	2.75	2.38	21	18	25	16	5.7	4.9	5.5	1	1.1	1	1	1	5.5	4	4.4	1.1	1.3	1	1	1	3.9	1.8	1.9	1.4	1	1	1.1	1	4	2	1.7	1.4	1.1	1	1	1	2.2	4.2	1	1.6	2.8
S26	Object_fear	45	female	100	367	8	2.75	2.38	21	18	25	16	5.7	4.9	5.5	1	1.1	1	1	1	5.5	4	4.4	1.1	1.3	1	1	1	3.9	1.8	1.9	1.4	1	1	1.1	1	4	2	1.7	1.4	1.1	1	1	1	2.2	4.2	1	1.6	2.8
S26	Object_sadness	45	female	100	367	8	2.75	2.38	21	18	25	16	5.7	4.9	5.5	1	1.1	1	1	1	5.5	4	4.4	1.1	1.3	1	1	1	3.9	1.8	1.9	1.4	1	1	1.1	1	4	2	1.7	1.4	1.1	1	1	1	2.2	4.2	1	1.6	2.8
S26	Object_valence	45	female	100	367	8	2.75	2.38	21	18	25	16	5.7	4.9	5.5	1	1.1	1	1	1	5.5	4	4.4	1.1	1.3	1	1	1	3.9	1.8	1.9	1.4	1	1	1.1	1	4	2	1.7	1.4	1.1	1	1	1	2.2	4.2	1	1.6	2.8
S26	Object_anger	45	female	100	367	8	2.75	2.38	21	18	25	16	5.7	4.9	5.5	1	1.1	1	1	1	5.5	4	4.4	1.1	1.3	1	1	1	3.9	1.8	1.9	1.4	1	1	1.1	1	4	2	1.7	1.4	1.1	1	1	1	2.2	4.2	1	1.6	2.8
S26	Object_surprise	45	female	100	367	8	2.75	2.38	21	18	25	16	5.7	4.9	5.5	1	1.1	1	1	1	5.5	4	4.4	1.1	1.3	1	1	1	3.9	1.8	1.9	1.4	1	1	1.1	1	4	2	1.7	1.4	1.1	1	1	1	2.2	4.2	1	1.6	2.8
S26	Pixel_arousal	45	female	100	367	8	2.75	2.38	21	18	25	16	5.7	4.9	5.5	1	1.1	1	1	1	5.5	4	4.4	1.1	1.3	1	1	1	3.9	1.8	1.9	1.4	1	1	1.1	1	4	2	1.7	1.4	1.1	1	1	1	2.2	4.2	1	1.6	2.8
S26	Pixel_happiness	45	female	100	367	8	2.75	2.38	21	18	25	16	5.7	4.9	5.5	1	1.1	1	1	1	5.5	4	4.4	1.1	1.3	1	1	1	3.9	1.8	1.9	1.4	1	1	1.1	1	4	2	1.7	1.4	1.1	1	1	1	2.2	4.2	1	1.6	2.8
S26	Pixel_disgust	45	female	100	367	8	2.75	2.38	21	18	25	16	5.7	4.9	5.5	1	1.1	1	1	1	5.5	4	4.4	1.1	1.3	1	1	1	3.9	1.8	1.9	1.4	1	1	1.1	1	4	2	1.7	1.4	1.1	1	1	1	2.2	4.2	1	1.6	2.8
S26	Pixel_fear	45	female	100	367	8	2.75	2.38	21	18	25	16	5.7	4.9	5.5	1	1.1	1	1	1	5.5	4	4.4	1.1	1.3	1	1	1	3.9	1.8	1.9	1.4	1	1	1.1	1	4	2	1.7	1.4	1.1	1	1	1	2.2	4.2	1	1.6	2.8
S26	Pixel_sadness	45	female	100	367	8	2.75	2.38	21	18	25	16	5.7	4.9	5.5	1	1.1	1	1	1	5.5	4	4.4	1.1	1.3	1	1	1	3.9	1.8	1.9	1.4	1	1	1.1	1	4	2	1.7	1.4	1.1	1	1	1	2.2	4.2	1	1.6	2.8
S26	Pixel_valence	45	female	100	367	8	2.75	2.38	21	18	25	16	5.7	4.9	5.5	1	1.1	1	1	1	5.5	4	4.4	1.1	1.3	1	1	1	3.9	1.8	1.9	1.4	1	1	1.1	1	4	2	1.7	1.4	1.1	1	1	1	2.2	4.2	1	1.6	2.8
S26	Pixel_anger	45	female	100	367	8	2.75	2.38	21	18	25	16	5.7	4.9	5.5	1	1.1	1	1	1	5.5	4	4.4	1.1	1.3	1	1	1	3.9	1.8	1.9	1.4	1	1	1.1	1	4	2	1.7	1.4	1.1	1	1	1	2.2	4.2	1	1.6	2.8
S26	Pixel_surprise	45	female	100	367	8	2.75	2.38	21	18	25	16	5.7	4.9	5.5	1	1.1	1	1	1	5.5	4	4.4	1.1	1.3	1	1	1	3.9	1.8	1.9	1.4	1	1	1.1	1	4	2	1.7	1.4	1.1	1	1	1	2.2	4.2	1	1.6	2.8
S27	ThreateningDogs_arousal	46	female	100	434.5	17	3.75	1.88	22	22	25	22	6.4	5.6	5.7	1.2	3.3	1.2	1.1	1.4	5.8	5	5	1.7	3.3	1.1	1	1	3.1	3.9	1.9	5.2	1.2	4	2.9	2.8	3.6	3.9	1.8	4.2	1.8	2.9	1.4	2.7	2.5	5.1	1.7	3.1	3.7
S27	ThreateningDogs_happiness	46	female	100	434.5	17	3.75	1.88	22	22	25	22	6.4	5.6	5.7	1.2	3.3	1.2	1.1	1.4	5.8	5	5	1.7	3.3	1.1	1	1	3.1	3.9	1.9	5.2	1.2	4	2.9	2.8	3.6	3.9	1.8	4.2	1.8	2.9	1.4	2.7	2.5	5.1	1.7	3.1	3.7
S27	ThreateningDogs_disgust	46	female	100	434.5	17	3.75	1.88	22	22	25	22	6.4	5.6	5.7	1.2	3.3	1.2	1.1	1.4	5.8	5	5	1.7	3.3	1.1	1	1	3.1	3.9	1.9	5.2	1.2	4	2.9	2.8	3.6	3.9	1.8	4.2	1.8	2.9	1.4	2.7	2.5	5.1	1.7	3.1	3.7
S27	ThreateningDogs_fear	46	female	100	434.5	17	3.75	1.88	22	22	25	22	6.4	5.6	5.7	1.2	3.3	1.2	1.1	1.4	5.8	5	5	1.7	3.3	1.1	1	1	3.1	3.9	1.9	5.2	1.2	4	2.9	2.8	3.6	3.9	1.8	4.2	1.8	2.9	1.4	2.7	2.5	5.1	1.7	3.1	3.7
S27	ThreateningDogs_sadness	46	female	100	434.5	17	3.75	1.88	22	22	25	22	6.4	5.6	5.7	1.2	3.3	1.2	1.1	1.4	5.8	5	5	1.7	3.3	1.1	1	1	3.1	3.9	1.9	5.2	1.2	4	2.9	2.8	3.6	3.9	1.8	4.2	1.8	2.9	1.4	2.7	2.5	5.1	1.7	3.1	3.7
S27	ThreateningDogs_valence	46	female	100	434.5	17	3.75	1.88	22	22	25	22	6.4	5.6	5.7	1.2	3.3	1.2	1.1	1.4	5.8	5	5	1.7	3.3	1.1	1	1	3.1	3.9	1.9	5.2	1.2	4	2.9	2.8	3.6	3.9	1.8	4.2	1.8	2.9	1.4	2.7	2.5	5.1	1.7	3.1	3.7
S27	ThreateningDogs_anger	46	female	100	434.5	17	3.75	1.88	22	22	25	22	6.4	5.6	5.7	1.2	3.3	1.2	1.1	1.4	5.8	5	5	1.7	3.3	1.1	1	1	3.1	3.9	1.9	5.2	1.2	4	2.9	2.8	3.6	3.9	1.8	4.2	1.8	2.9	1.4	2.7	2.5	5.1	1.7	3.1	3.7
S27	ThreateningDogs_surprise	46	female	100	434.5	17	3.75	1.88	22	22	25	22	6.4	5.6	5.7	1.2	3.3	1.2	1.1	1.4	5.8	5	5	1.7	3.3	1.1	1	1	3.1	3.9	1.9	5.2	1.2	4	2.9	2.8	3.6	3.9	1.8	4.2	1.8	2.9	1.4	2.7	2.5	5.1	1.7	3.1	3.7
S27	ThreateningHumans_arousal	46	female	100	434.5	17	3.75	1.88	22	22	25	22	6.4	5.6	5.7	1.2	3.3	1.2	1.1	1.4	5.8	5	5	1.7	3.3	1.1	1	1	3.1	3.9	1.9	5.2	1.2	4	2.9	2.8	3.6	3.9	1.8	4.2	1.8	2.9	1.4	2.7	2.5	5.1	1.7	3.1	3.7
S27	ThreateningHumans_happiness	46	female	100	434.5	17	3.75	1.88	22	22	25	22	6.4	5.6	5.7	1.2	3.3	1.2	1.1	1.4	5.8	5	5	1.7	3.3	1.1	1	1	3.1	3.9	1.9	5.2	1.2	4	2.9	2.8	3.6	3.9	1.8	4.2	1.8	2.9	1.4	2.7	2.5	5.1	1.7	3.1	3.7
S27	ThreateningHumans_disgust	46	female	100	434.5	17	3.75	1.88	22	22	25	22	6.4	5.6	5.7	1.2	3.3	1.2	1.1	1.4	5.8	5	5	1.7	3.3	1.1	1	1	3.1	3.9	1.9	5.2	1.2	4	2.9	2.8	3.6	3.9	1.8	4.2	1.8	2.9	1.4	2.7	2.5	5.1	1.7	3.1	3.7
S27	ThreateningHumans_fear	46	female	100	434.5	17	3.75	1.88	22	22	25	22	6.4	5.6	5.7	1.2	3.3	1.2	1.1	1.4	5.8	5	5	1.7	3.3	1.1	1	1	3.1	3.9	1.9	5.2	1.2	4	2.9	2.8	3.6	3.9	1.8	4.2	1.8	2.9	1.4	2.7	2.5	5.1	1.7	3.1	3.7
S27	ThreateningHumans_sadness	46	female	100	434.5	17	3.75	1.88	22	22	25	22	6.4	5.6	5.7	1.2	3.3	1.2	1.1	1.4	5.8	5	5	1.7	3.3	1.1	1	1	3.1	3.9	1.9	5.2	1.2	4	2.9	2.8	3.6	3.9	1.8	4.2	1.8	2.9	1.4	2.7	2.5	5.1	1.7	3.1	3.7
S27	ThreateningHumans_valence	46	female	100	434.5	17	3.75	1.88	22	22	25	22	6.4	5.6	5.7	1.2	3.3	1.2	1.1	1.4	5.8	5	5	1.7	3.3	1.1	1	1	3.1	3.9	1.9	5.2	1.2	4	2.9	2.8	3.6	3.9	1.8	4.2	1.8	2.9	1.4	2.7	2.5	5.1	1.7	3.1	3.7
S27	ThreateningHumans_anger	46	female	100	434.5	17	3.75	1.88	22	22	25	22	6.4	5.6	5.7	1.2	3.3	1.2	1.1	1.4	5.8	5	5	1.7	3.3	1.1	1	1	3.1	3.9	1.9	5.2	1.2	4	2.9	2.8	3.6	3.9	1.8	4.2	1.8	2.9	1.4	2.7	2.5	5.1	1.7	3.1	3.7
S27	ThreateningHumans_surprise	46	female	100	434.5	17	3.75	1.88	22	22	25	22	6.4	5.6	5.7	1.2	3.3	1.2	1.1	1.4	5.8	5	5	1.7	3.3	1.1	1	1	3.1	3.9	1.9	5.2	1.2	4	2.9	2.8	3.6	3.9	1.8	4.2	1.8	2.9	1.4	2.7	2.5	5.1	1.7	3.1	3.7
S27	PleasantDogs_arousal	46	female	100	434.5	17	3.75	1.88	22	22	25	22	6.4	5.6	5.7	1.2	3.3	1.2	1.1	1.4	5.8	5	5	1.7	3.3	1.1	1	1	3.1	3.9	1.9	5.2	1.2	4	2.9	2.8	3.6	3.9	1.8	4.2	1.8	2.9	1.4	2.7	2.5	5.1	1.7	3.1	3.7
S27	PleasantDogs_happiness	46	female	100	434.5	17	3.75	1.88	22	22	25	22	6.4	5.6	5.7	1.2	3.3	1.2	1.1	1.4	5.8	5	5	1.7	3.3	1.1	1	1	3.1	3.9	1.9	5.2	1.2	4	2.9	2.8	3.6	3.9	1.8	4.2	1.8	2.9	1.4	2.7	2.5	5.1	1.7	3.1	3.7
S27	PleasantDogs_disgust	46	female	100	434.5	17	3.75	1.88	22	22	25	22	6.4	5.6	5.7	1.2	3.3	1.2	1.1	1.4	5.8	5	5	1.7	3.3	1.1	1	1	3.1	3.9	1.9	5.2	1.2	4	2.9	2.8	3.6	3.9	1.8	4.2	1.8	2.9	1.4	2.7	2.5	5.1	1.7	3.1	3.7
S27	PleasantDogs_fear	46	female	100	434.5	17	3.75	1.88	22	22	25	22	6.4	5.6	5.7	1.2	3.3	1.2	1.1	1.4	5.8	5	5	1.7	3.3	1.1	1	1	3.1	3.9	1.9	5.2	1.2	4	2.9	2.8	3.6	3.9	1.8	4.2	1.8	2.9	1.4	2.7	2.5	5.1	1.7	3.1	3.7
S27	PleasantDogs_sadness	46	female	100	434.5	17	3.75	1.88	22	22	25	22	6.4	5.6	5.7	1.2	3.3	1.2	1.1	1.4	5.8	5	5	1.7	3.3	1.1	1	1	3.1	3.9	1.9	5.2	1.2	4	2.9	2.8	3.6	3.9	1.8	4.2	1.8	2.9	1.4	2.7	2.5	5.1	1.7	3.1	3.7
S27	PleasantDogs_valence	46	female	100	434.5	17	3.75	1.88	22	22	25	22	6.4	5.6	5.7	1.2	3.3	1.2	1.1	1.4	5.8	5	5	1.7	3.3	1.1	1	1	3.1	3.9	1.9	5.2	1.2	4	2.9	2.8	3.6	3.9	1.8	4.2	1.8	2.9	1.4	2.7	2.5	5.1	1.7	3.1	3.7
S27	PleasantDogs_anger	46	female	100	434.5	17	3.75	1.88	22	22	25	22	6.4	5.6	5.7	1.2	3.3	1.2	1.1	1.4	5.8	5	5	1.7	3.3	1.1	1	1	3.1	3.9	1.9	5.2	1.2	4	2.9	2.8	3.6	3.9	1.8	4.2	1.8	2.9	1.4	2.7	2.5	5.1	1.7	3.1	3.7
S27	PleasantDogs_surprise	46	female	100	434.5	17	3.75	1.88	22	22	25	22	6.4	5.6	5.7	1.2	3.3	1.2	1.1	1.4	5.8	5	5	1.7	3.3	1.1	1	1	3.1	3.9	1.9	5.2	1.2	4	2.9	2.8	3.6	3.9	1.8	4.2	1.8	2.9	1.4	2.7	2.5	5.1	1.7	3.1	3.7
S27	PleasantHumans_arousal	46	female	100	434.5	17	3.75	1.88	22	22	25	22	6.4	5.6	5.7	1.2	3.3	1.2	1.1	1.4	5.8	5	5	1.7	3.3	1.1	1	1	3.1	3.9	1.9	5.2	1.2	4	2.9	2.8	3.6	3.9	1.8	4.2	1.8	2.9	1.4	2.7	2.5	5.1	1.7	3.1	3.7
S27	PleasantHumans_happiness	46	female	100	434.5	17	3.75	1.88	22	22	25	22	6.4	5.6	5.7	1.2	3.3	1.2	1.1	1.4	5.8	5	5	1.7	3.3	1.1	1	1	3.1	3.9	1.9	5.2	1.2	4	2.9	2.8	3.6	3.9	1.8	4.2	1.8	2.9	1.4	2.7	2.5	5.1	1.7	3.1	3.7
S27	PleasantHumans_disgust	46	female	100	434.5	17	3.75	1.88	22	22	25	22	6.4	5.6	5.7	1.2	3.3	1.2	1.1	1.4	5.8	5	5	1.7	3.3	1.1	1	1	3.1	3.9	1.9	5.2	1.2	4	2.9	2.8	3.6	3.9	1.8	4.2	1.8	2.9	1.4	2.7	2.5	5.1	1.7	3.1	3.7
S27	PleasantHumans_fear	46	female	100	434.5	17	3.75	1.88	22	22	25	22	6.4	5.6	5.7	1.2	3.3	1.2	1.1	1.4	5.8	5	5	1.7	3.3	1.1	1	1	3.1	3.9	1.9	5.2	1.2	4	2.9	2.8	3.6	3.9	1.8	4.2	1.8	2.9	1.4	2.7	2.5	5.1	1.7	3.1	3.7
S27	PleasantHumans_sadness	46	female	100	434.5	17	3.75	1.88	22	22	25	22	6.4	5.6	5.7	1.2	3.3	1.2	1.1	1.4	5.8	5	5	1.7	3.3	1.1	1	1	3.1	3.9	1.9	5.2	1.2	4	2.9	2.8	3.6	3.9	1.8	4.2	1.8	2.9	1.4	2.7	2.5	5.1	1.7	3.1	3.7
S27	PleasantHumans_valence	46	female	100	434.5	17	3.75	1.88	22	22	25	22	6.4	5.6	5.7	1.2	3.3	1.2	1.1	1.4	5.8	5	5	1.7	3.3	1.1	1	1	3.1	3.9	1.9	5.2	1.2	4	2.9	2.8	3.6	3.9	1.8	4.2	1.8	2.9	1.4	2.7	2.5	5.1	1.7	3.1	3.7
S27	PleasantHumans_anger	46	female	100	434.5	17	3.75	1.88	22	22	25	22	6.4	5.6	5.7	1.2	3.3	1.2	1.1	1.4	5.8	5	5	1.7	3.3	1.1	1	1	3.1	3.9	1.9	5.2	1.2	4	2.9	2.8	3.6	3.9	1.8	4.2	1.8	2.9	1.4	2.7	2.5	5.1	1.7	3.1	3.7
S27	PleasantHumans_surprise	46	female	100	434.5	17	3.75	1.88	22	22	25	22	6.4	5.6	5.7	1.2	3.3	1.2	1.1	1.4	5.8	5	5	1.7	3.3	1.1	1	1	3.1	3.9	1.9	5.2	1.2	4	2.9	2.8	3.6	3.9	1.8	4.2	1.8	2.9	1.4	2.7	2.5	5.1	1.7	3.1	3.7
S27	NeutralDogs_arousal	46	female	100	434.5	17	3.75	1.88	22	22	25	22	6.4	5.6	5.7	1.2	3.3	1.2	1.1	1.4	5.8	5	5	1.7	3.3	1.1	1	1	3.1	3.9	1.9	5.2	1.2	4	2.9	2.8	3.6	3.9	1.8	4.2	1.8	2.9	1.4	2.7	2.5	5.1	1.7	3.1	3.7
S27	NeutralDogs_happiness	46	female	100	434.5	17	3.75	1.88	22	22	25	22	6.4	5.6	5.7	1.2	3.3	1.2	1.1	1.4	5.8	5	5	1.7	3.3	1.1	1	1	3.1	3.9	1.9	5.2	1.2	4	2.9	2.8	3.6	3.9	1.8	4.2	1.8	2.9	1.4	2.7	2.5	5.1	1.7	3.1	3.7
S27	NeutralDogs_disgust	46	female	100	434.5	17	3.75	1.88	22	22	25	22	6.4	5.6	5.7	1.2	3.3	1.2	1.1	1.4	5.8	5	5	1.7	3.3	1.1	1	1	3.1	3.9	1.9	5.2	1.2	4	2.9	2.8	3.6	3.9	1.8	4.2	1.8	2.9	1.4	2.7	2.5	5.1	1.7	3.1	3.7
S27	NeutralDogs_fear	46	female	100	434.5	17	3.75	1.88	22	22	25	22	6.4	5.6	5.7	1.2	3.3	1.2	1.1	1.4	5.8	5	5	1.7	3.3	1.1	1	1	3.1	3.9	1.9	5.2	1.2	4	2.9	2.8	3.6	3.9	1.8	4.2	1.8	2.9	1.4	2.7	2.5	5.1	1.7	3.1	3.7
S27	NeutralDogs_sadness	46	female	100	434.5	17	3.75	1.88	22	22	25	22	6.4	5.6	5.7	1.2	3.3	1.2	1.1	1.4	5.8	5	5	1.7	3.3	1.1	1	1	3.1	3.9	1.9	5.2	1.2	4	2.9	2.8	3.6	3.9	1.8	4.2	1.8	2.9	1.4	2.7	2.5	5.1	1.7	3.1	3.7
S27	NeutralDogs_valence	46	female	100	434.5	17	3.75	1.88	22	22	25	22	6.4	5.6	5.7	1.2	3.3	1.2	1.1	1.4	5.8	5	5	1.7	3.3	1.1	1	1	3.1	3.9	1.9	5.2	1.2	4	2.9	2.8	3.6	3.9	1.8	4.2	1.8	2.9	1.4	2.7	2.5	5.1	1.7	3.1	3.7
S27	NeutralDogs_anger	46	female	100	434.5	17	3.75	1.88	22	22	25	22	6.4	5.6	5.7	1.2	3.3	1.2	1.1	1.4	5.8	5	5	1.7	3.3	1.1	1	1	3.1	3.9	1.9	5.2	1.2	4	2.9	2.8	3.6	3.9	1.8	4.2	1.8	2.9	1.4	2.7	2.5	5.1	1.7	3.1	3.7
S27	NeutralDogs_surprise	46	female	100	434.5	17	3.75	1.88	22	22	25	22	6.4	5.6	5.7	1.2	3.3	1.2	1.1	1.4	5.8	5	5	1.7	3.3	1.1	1	1	3.1	3.9	1.9	5.2	1.2	4	2.9	2.8	3.6	3.9	1.8	4.2	1.8	2.9	1.4	2.7	2.5	5.1	1.7	3.1	3.7
S27	NeutralHumans_arousal	46	female	100	434.5	17	3.75	1.88	22	22	25	22	6.4	5.6	5.7	1.2	3.3	1.2	1.1	1.4	5.8	5	5	1.7	3.3	1.1	1	1	3.1	3.9	1.9	5.2	1.2	4	2.9	2.8	3.6	3.9	1.8	4.2	1.8	2.9	1.4	2.7	2.5	5.1	1.7	3.1	3.7
S27	NeutralHumans_happiness	46	female	100	434.5	17	3.75	1.88	22	22	25	22	6.4	5.6	5.7	1.2	3.3	1.2	1.1	1.4	5.8	5	5	1.7	3.3	1.1	1	1	3.1	3.9	1.9	5.2	1.2	4	2.9	2.8	3.6	3.9	1.8	4.2	1.8	2.9	1.4	2.7	2.5	5.1	1.7	3.1	3.7
S27	NeutralHumans_disgust	46	female	100	434.5	17	3.75	1.88	22	22	25	22	6.4	5.6	5.7	1.2	3.3	1.2	1.1	1.4	5.8	5	5	1.7	3.3	1.1	1	1	3.1	3.9	1.9	5.2	1.2	4	2.9	2.8	3.6	3.9	1.8	4.2	1.8	2.9	1.4	2.7	2.5	5.1	1.7	3.1	3.7
S27	NeutralHumans_fear	46	female	100	434.5	17	3.75	1.88	22	22	25	22	6.4	5.6	5.7	1.2	3.3	1.2	1.1	1.4	5.8	5	5	1.7	3.3	1.1	1	1	3.1	3.9	1.9	5.2	1.2	4	2.9	2.8	3.6	3.9	1.8	4.2	1.8	2.9	1.4	2.7	2.5	5.1	1.7	3.1	3.7
S27	NeutralHumans_sadness	46	female	100	434.5	17	3.75	1.88	22	22	25	22	6.4	5.6	5.7	1.2	3.3	1.2	1.1	1.4	5.8	5	5	1.7	3.3	1.1	1	1	3.1	3.9	1.9	5.2	1.2	4	2.9	2.8	3.6	3.9	1.8	4.2	1.8	2.9	1.4	2.7	2.5	5.1	1.7	3.1	3.7
S27	NeutralHumans_valence	46	female	100	434.5	17	3.75	1.88	22	22	25	22	6.4	5.6	5.7	1.2	3.3	1.2	1.1	1.4	5.8	5	5	1.7	3.3	1.1	1	1	3.1	3.9	1.9	5.2	1.2	4	2.9	2.8	3.6	3.9	1.8	4.2	1.8	2.9	1.4	2.7	2.5	5.1	1.7	3.1	3.7
S27	NeutralHumans_anger	46	female	100	434.5	17	3.75	1.88	22	22	25	22	6.4	5.6	5.7	1.2	3.3	1.2	1.1	1.4	5.8	5	5	1.7	3.3	1.1	1	1	3.1	3.9	1.9	5.2	1.2	4	2.9	2.8	3.6	3.9	1.8	4.2	1.8	2.9	1.4	2.7	2.5	5.1	1.7	3.1	3.7
S27	NeutralHumans_surprise	46	female	100	434.5	17	3.75	1.88	22	22	25	22	6.4	5.6	5.7	1.2	3.3	1.2	1.1	1.4	5.8	5	5	1.7	3.3	1.1	1	1	3.1	3.9	1.9	5.2	1.2	4	2.9	2.8	3.6	3.9	1.8	4.2	1.8	2.9	1.4	2.7	2.5	5.1	1.7	3.1	3.7
S27	Object_arousal	46	female	100	434.5	17	3.75	1.88	22	22	25	22	6.4	5.6	5.7	1.2	3.3	1.2	1.1	1.4	5.8	5	5	1.7	3.3	1.1	1	1	3.1	3.9	1.9	5.2	1.2	4	2.9	2.8	3.6	3.9	1.8	4.2	1.8	2.9	1.4	2.7	2.5	5.1	1.7	3.1	3.7
S27	Object_happiness	46	female	100	434.5	17	3.75	1.88	22	22	25	22	6.4	5.6	5.7	1.2	3.3	1.2	1.1	1.4	5.8	5	5	1.7	3.3	1.1	1	1	3.1	3.9	1.9	5.2	1.2	4	2.9	2.8	3.6	3.9	1.8	4.2	1.8	2.9	1.4	2.7	2.5	5.1	1.7	3.1	3.7
S27	Object_disgust	46	female	100	434.5	17	3.75	1.88	22	22	25	22	6.4	5.6	5.7	1.2	3.3	1.2	1.1	1.4	5.8	5	5	1.7	3.3	1.1	1	1	3.1	3.9	1.9	5.2	1.2	4	2.9	2.8	3.6	3.9	1.8	4.2	1.8	2.9	1.4	2.7	2.5	5.1	1.7	3.1	3.7
S27	Object_fear	46	female	100	434.5	17	3.75	1.88	22	22	25	22	6.4	5.6	5.7	1.2	3.3	1.2	1.1	1.4	5.8	5	5	1.7	3.3	1.1	1	1	3.1	3.9	1.9	5.2	1.2	4	2.9	2.8	3.6	3.9	1.8	4.2	1.8	2.9	1.4	2.7	2.5	5.1	1.7	3.1	3.7
S27	Object_sadness	46	female	100	434.5	17	3.75	1.88	22	22	25	22	6.4	5.6	5.7	1.2	3.3	1.2	1.1	1.4	5.8	5	5	1.7	3.3	1.1	1	1	3.1	3.9	1.9	5.2	1.2	4	2.9	2.8	3.6	3.9	1.8	4.2	1.8	2.9	1.4	2.7	2.5	5.1	1.7	3.1	3.7
S27	Object_valence	46	female	100	434.5	17	3.75	1.88	22	22	25	22	6.4	5.6	5.7	1.2	3.3	1.2	1.1	1.4	5.8	5	5	1.7	3.3	1.1	1	1	3.1	3.9	1.9	5.2	1.2	4	2.9	2.8	3.6	3.9	1.8	4.2	1.8	2.9	1.4	2.7	2.5	5.1	1.7	3.1	3.7
S27	Object_anger	46	female	100	434.5	17	3.75	1.88	22	22	25	22	6.4	5.6	5.7	1.2	3.3	1.2	1.1	1.4	5.8	5	5	1.7	3.3	1.1	1	1	3.1	3.9	1.9	5.2	1.2	4	2.9	2.8	3.6	3.9	1.8	4.2	1.8	2.9	1.4	2.7	2.5	5.1	1.7	3.1	3.7
S27	Object_surprise	46	female	100	434.5	17	3.75	1.88	22	22	25	22	6.4	5.6	5.7	1.2	3.3	1.2	1.1	1.4	5.8	5	5	1.7	3.3	1.1	1	1	3.1	3.9	1.9	5.2	1.2	4	2.9	2.8	3.6	3.9	1.8	4.2	1.8	2.9	1.4	2.7	2.5	5.1	1.7	3.1	3.7
S27	Pixel_arousal	46	female	100	434.5	17	3.75	1.88	22	22	25	22	6.4	5.6	5.7	1.2	3.3	1.2	1.1	1.4	5.8	5	5	1.7	3.3	1.1	1	1	3.1	3.9	1.9	5.2	1.2	4	2.9	2.8	3.6	3.9	1.8	4.2	1.8	2.9	1.4	2.7	2.5	5.1	1.7	3.1	3.7
S27	Pixel_happiness	46	female	100	434.5	17	3.75	1.88	22	22	25	22	6.4	5.6	5.7	1.2	3.3	1.2	1.1	1.4	5.8	5	5	1.7	3.3	1.1	1	1	3.1	3.9	1.9	5.2	1.2	4	2.9	2.8	3.6	3.9	1.8	4.2	1.8	2.9	1.4	2.7	2.5	5.1	1.7	3.1	3.7
S27	Pixel_disgust	46	female	100	434.5	17	3.75	1.88	22	22	25	22	6.4	5.6	5.7	1.2	3.3	1.2	1.1	1.4	5.8	5	5	1.7	3.3	1.1	1	1	3.1	3.9	1.9	5.2	1.2	4	2.9	2.8	3.6	3.9	1.8	4.2	1.8	2.9	1.4	2.7	2.5	5.1	1.7	3.1	3.7
S27	Pixel_fear	46	female	100	434.5	17	3.75	1.88	22	22	25	22	6.4	5.6	5.7	1.2	3.3	1.2	1.1	1.4	5.8	5	5	1.7	3.3	1.1	1	1	3.1	3.9	1.9	5.2	1.2	4	2.9	2.8	3.6	3.9	1.8	4.2	1.8	2.9	1.4	2.7	2.5	5.1	1.7	3.1	3.7
S27	Pixel_sadness	46	female	100	434.5	17	3.75	1.88	22	22	25	22	6.4	5.6	5.7	1.2	3.3	1.2	1.1	1.4	5.8	5	5	1.7	3.3	1.1	1	1	3.1	3.9	1.9	5.2	1.2	4	2.9	2.8	3.6	3.9	1.8	4.2	1.8	2.9	1.4	2.7	2.5	5.1	1.7	3.1	3.7
S27	Pixel_valence	46	female	100	434.5	17	3.75	1.88	22	22	25	22	6.4	5.6	5.7	1.2	3.3	1.2	1.1	1.4	5.8	5	5	1.7	3.3	1.1	1	1	3.1	3.9	1.9	5.2	1.2	4	2.9	2.8	3.6	3.9	1.8	4.2	1.8	2.9	1.4	2.7	2.5	5.1	1.7	3.1	3.7
S27	Pixel_anger	46	female	100	434.5	17	3.75	1.88	22	22	25	22	6.4	5.6	5.7	1.2	3.3	1.2	1.1	1.4	5.8	5	5	1.7	3.3	1.1	1	1	3.1	3.9	1.9	5.2	1.2	4	2.9	2.8	3.6	3.9	1.8	4.2	1.8	2.9	1.4	2.7	2.5	5.1	1.7	3.1	3.7
S27	Pixel_surprise	46	female	100	434.5	17	3.75	1.88	22	22	25	22	6.4	5.6	5.7	1.2	3.3	1.2	1.1	1.4	5.8	5	5	1.7	3.3	1.1	1	1	3.1	3.9	1.9	5.2	1.2	4	2.9	2.8	3.6	3.9	1.8	4.2	1.8	2.9	1.4	2.7	2.5	5.1	1.7	3.1	3.7
S28	ThreateningDogs_arousal	43	female	90	420	17	3.88	2.5	25	17	15	19	5.7	4.8	5.6	2	2.5	1	1.7	1.8	5.7	3.4	5.1	1.7	2.1	1	1.8	1.7	3.4	1.7	1.5	3.9	1.3	1.8	2.7	2.2	3.9	1.9	2.7	2.8	2	1.1	2.7	2	2	5.6	1	2.2	3.6
S28	ThreateningDogs_happiness	43	female	90	420	17	3.88	2.5	25	17	15	19	5.7	4.8	5.6	2	2.5	1	1.7	1.8	5.7	3.4	5.1	1.7	2.1	1	1.8	1.7	3.4	1.7	1.5	3.9	1.3	1.8	2.7	2.2	3.9	1.9	2.7	2.8	2	1.1	2.7	2	2	5.6	1	2.2	3.6
S28	ThreateningDogs_disgust	43	female	90	420	17	3.88	2.5	25	17	15	19	5.7	4.8	5.6	2	2.5	1	1.7	1.8	5.7	3.4	5.1	1.7	2.1	1	1.8	1.7	3.4	1.7	1.5	3.9	1.3	1.8	2.7	2.2	3.9	1.9	2.7	2.8	2	1.1	2.7	2	2	5.6	1	2.2	3.6
S28	ThreateningDogs_fear	43	female	90	420	17	3.88	2.5	25	17	15	19	5.7	4.8	5.6	2	2.5	1	1.7	1.8	5.7	3.4	5.1	1.7	2.1	1	1.8	1.7	3.4	1.7	1.5	3.9	1.3	1.8	2.7	2.2	3.9	1.9	2.7	2.8	2	1.1	2.7	2	2	5.6	1	2.2	3.6
S28	ThreateningDogs_sadness	43	female	90	420	17	3.88	2.5	25	17	15	19	5.7	4.8	5.6	2	2.5	1	1.7	1.8	5.7	3.4	5.1	1.7	2.1	1	1.8	1.7	3.4	1.7	1.5	3.9	1.3	1.8	2.7	2.2	3.9	1.9	2.7	2.8	2	1.1	2.7	2	2	5.6	1	2.2	3.6
S28	ThreateningDogs_valence	43	female	90	420	17	3.88	2.5	25	17	15	19	5.7	4.8	5.6	2	2.5	1	1.7	1.8	5.7	3.4	5.1	1.7	2.1	1	1.8	1.7	3.4	1.7	1.5	3.9	1.3	1.8	2.7	2.2	3.9	1.9	2.7	2.8	2	1.1	2.7	2	2	5.6	1	2.2	3.6
S28	ThreateningDogs_anger	43	female	90	420	17	3.88	2.5	25	17	15	19	5.7	4.8	5.6	2	2.5	1	1.7	1.8	5.7	3.4	5.1	1.7	2.1	1	1.8	1.7	3.4	1.7	1.5	3.9	1.3	1.8	2.7	2.2	3.9	1.9	2.7	2.8	2	1.1	2.7	2	2	5.6	1	2.2	3.6
S28	ThreateningDogs_surprise	43	female	90	420	17	3.88	2.5	25	17	15	19	5.7	4.8	5.6	2	2.5	1	1.7	1.8	5.7	3.4	5.1	1.7	2.1	1	1.8	1.7	3.4	1.7	1.5	3.9	1.3	1.8	2.7	2.2	3.9	1.9	2.7	2.8	2	1.1	2.7	2	2	5.6	1	2.2	3.6
S28	ThreateningHumans_arousal	43	female	90	420	17	3.88	2.5	25	17	15	19	5.7	4.8	5.6	2	2.5	1	1.7	1.8	5.7	3.4	5.1	1.7	2.1	1	1.8	1.7	3.4	1.7	1.5	3.9	1.3	1.8	2.7	2.2	3.9	1.9	2.7	2.8	2	1.1	2.7	2	2	5.6	1	2.2	3.6
S28	ThreateningHumans_happiness	43	female	90	420	17	3.88	2.5	25	17	15	19	5.7	4.8	5.6	2	2.5	1	1.7	1.8	5.7	3.4	5.1	1.7	2.1	1	1.8	1.7	3.4	1.7	1.5	3.9	1.3	1.8	2.7	2.2	3.9	1.9	2.7	2.8	2	1.1	2.7	2	2	5.6	1	2.2	3.6
S28	ThreateningHumans_disgust	43	female	90	420	17	3.88	2.5	25	17	15	19	5.7	4.8	5.6	2	2.5	1	1.7	1.8	5.7	3.4	5.1	1.7	2.1	1	1.8	1.7	3.4	1.7	1.5	3.9	1.3	1.8	2.7	2.2	3.9	1.9	2.7	2.8	2	1.1	2.7	2	2	5.6	1	2.2	3.6
S28	ThreateningHumans_fear	43	female	90	420	17	3.88	2.5	25	17	15	19	5.7	4.8	5.6	2	2.5	1	1.7	1.8	5.7	3.4	5.1	1.7	2.1	1	1.8	1.7	3.4	1.7	1.5	3.9	1.3	1.8	2.7	2.2	3.9	1.9	2.7	2.8	2	1.1	2.7	2	2	5.6	1	2.2	3.6
S28	ThreateningHumans_sadness	43	female	90	420	17	3.88	2.5	25	17	15	19	5.7	4.8	5.6	2	2.5	1	1.7	1.8	5.7	3.4	5.1	1.7	2.1	1	1.8	1.7	3.4	1.7	1.5	3.9	1.3	1.8	2.7	2.2	3.9	1.9	2.7	2.8	2	1.1	2.7	2	2	5.6	1	2.2	3.6
S28	ThreateningHumans_valence	43	female	90	420	17	3.88	2.5	25	17	15	19	5.7	4.8	5.6	2	2.5	1	1.7	1.8	5.7	3.4	5.1	1.7	2.1	1	1.8	1.7	3.4	1.7	1.5	3.9	1.3	1.8	2.7	2.2	3.9	1.9	2.7	2.8	2	1.1	2.7	2	2	5.6	1	2.2	3.6
S28	ThreateningHumans_anger	43	female	90	420	17	3.88	2.5	25	17	15	19	5.7	4.8	5.6	2	2.5	1	1.7	1.8	5.7	3.4	5.1	1.7	2.1	1	1.8	1.7	3.4	1.7	1.5	3.9	1.3	1.8	2.7	2.2	3.9	1.9	2.7	2.8	2	1.1	2.7	2	2	5.6	1	2.2	3.6
S28	ThreateningHumans_surprise	43	female	90	420	17	3.88	2.5	25	17	15	19	5.7	4.8	5.6	2	2.5	1	1.7	1.8	5.7	3.4	5.1	1.7	2.1	1	1.8	1.7	3.4	1.7	1.5	3.9	1.3	1.8	2.7	2.2	3.9	1.9	2.7	2.8	2	1.1	2.7	2	2	5.6	1	2.2	3.6
S28	PleasantDogs_arousal	43	female	90	420	17	3.88	2.5	25	17	15	19	5.7	4.8	5.6	2	2.5	1	1.7	1.8	5.7	3.4	5.1	1.7	2.1	1	1.8	1.7	3.4	1.7	1.5	3.9	1.3	1.8	2.7	2.2	3.9	1.9	2.7	2.8	2	1.1	2.7	2	2	5.6	1	2.2	3.6
S28	PleasantDogs_happiness	43	female	90	420	17	3.88	2.5	25	17	15	19	5.7	4.8	5.6	2	2.5	1	1.7	1.8	5.7	3.4	5.1	1.7	2.1	1	1.8	1.7	3.4	1.7	1.5	3.9	1.3	1.8	2.7	2.2	3.9	1.9	2.7	2.8	2	1.1	2.7	2	2	5.6	1	2.2	3.6
S28	PleasantDogs_disgust	43	female	90	420	17	3.88	2.5	25	17	15	19	5.7	4.8	5.6	2	2.5	1	1.7	1.8	5.7	3.4	5.1	1.7	2.1	1	1.8	1.7	3.4	1.7	1.5	3.9	1.3	1.8	2.7	2.2	3.9	1.9	2.7	2.8	2	1.1	2.7	2	2	5.6	1	2.2	3.6
S28	PleasantDogs_fear	43	female	90	420	17	3.88	2.5	25	17	15	19	5.7	4.8	5.6	2	2.5	1	1.7	1.8	5.7	3.4	5.1	1.7	2.1	1	1.8	1.7	3.4	1.7	1.5	3.9	1.3	1.8	2.7	2.2	3.9	1.9	2.7	2.8	2	1.1	2.7	2	2	5.6	1	2.2	3.6
S28	PleasantDogs_sadness	43	female	90	420	17	3.88	2.5	25	17	15	19	5.7	4.8	5.6	2	2.5	1	1.7	1.8	5.7	3.4	5.1	1.7	2.1	1	1.8	1.7	3.4	1.7	1.5	3.9	1.3	1.8	2.7	2.2	3.9	1.9	2.7	2.8	2	1.1	2.7	2	2	5.6	1	2.2	3.6
S28	PleasantDogs_valence	43	female	90	420	17	3.88	2.5	25	17	15	19	5.7	4.8	5.6	2	2.5	1	1.7	1.8	5.7	3.4	5.1	1.7	2.1	1	1.8	1.7	3.4	1.7	1.5	3.9	1.3	1.8	2.7	2.2	3.9	1.9	2.7	2.8	2	1.1	2.7	2	2	5.6	1	2.2	3.6
S28	PleasantDogs_anger	43	female	90	420	17	3.88	2.5	25	17	15	19	5.7	4.8	5.6	2	2.5	1	1.7	1.8	5.7	3.4	5.1	1.7	2.1	1	1.8	1.7	3.4	1.7	1.5	3.9	1.3	1.8	2.7	2.2	3.9	1.9	2.7	2.8	2	1.1	2.7	2	2	5.6	1	2.2	3.6
S28	PleasantDogs_surprise	43	female	90	420	17	3.88	2.5	25	17	15	19	5.7	4.8	5.6	2	2.5	1	1.7	1.8	5.7	3.4	5.1	1.7	2.1	1	1.8	1.7	3.4	1.7	1.5	3.9	1.3	1.8	2.7	2.2	3.9	1.9	2.7	2.8	2	1.1	2.7	2	2	5.6	1	2.2	3.6
S28	PleasantHumans_arousal	43	female	90	420	17	3.88	2.5	25	17	15	19	5.7	4.8	5.6	2	2.5	1	1.7	1.8	5.7	3.4	5.1	1.7	2.1	1	1.8	1.7	3.4	1.7	1.5	3.9	1.3	1.8	2.7	2.2	3.9	1.9	2.7	2.8	2	1.1	2.7	2	2	5.6	1	2.2	3.6
S28	PleasantHumans_happiness	43	female	90	420	17	3.88	2.5	25	17	15	19	5.7	4.8	5.6	2	2.5	1	1.7	1.8	5.7	3.4	5.1	1.7	2.1	1	1.8	1.7	3.4	1.7	1.5	3.9	1.3	1.8	2.7	2.2	3.9	1.9	2.7	2.8	2	1.1	2.7	2	2	5.6	1	2.2	3.6
S28	PleasantHumans_disgust	43	female	90	420	17	3.88	2.5	25	17	15	19	5.7	4.8	5.6	2	2.5	1	1.7	1.8	5.7	3.4	5.1	1.7	2.1	1	1.8	1.7	3.4	1.7	1.5	3.9	1.3	1.8	2.7	2.2	3.9	1.9	2.7	2.8	2	1.1	2.7	2	2	5.6	1	2.2	3.6
S28	PleasantHumans_fear	43	female	90	420	17	3.88	2.5	25	17	15	19	5.7	4.8	5.6	2	2.5	1	1.7	1.8	5.7	3.4	5.1	1.7	2.1	1	1.8	1.7	3.4	1.7	1.5	3.9	1.3	1.8	2.7	2.2	3.9	1.9	2.7	2.8	2	1.1	2.7	2	2	5.6	1	2.2	3.6
S28	PleasantHumans_sadness	43	female	90	420	17	3.88	2.5	25	17	15	19	5.7	4.8	5.6	2	2.5	1	1.7	1.8	5.7	3.4	5.1	1.7	2.1	1	1.8	1.7	3.4	1.7	1.5	3.9	1.3	1.8	2.7	2.2	3.9	1.9	2.7	2.8	2	1.1	2.7	2	2	5.6	1	2.2	3.6
S28	PleasantHumans_valence	43	female	90	420	17	3.88	2.5	25	17	15	19	5.7	4.8	5.6	2	2.5	1	1.7	1.8	5.7	3.4	5.1	1.7	2.1	1	1.8	1.7	3.4	1.7	1.5	3.9	1.3	1.8	2.7	2.2	3.9	1.9	2.7	2.8	2	1.1	2.7	2	2	5.6	1	2.2	3.6
S28	PleasantHumans_anger	43	female	90	420	17	3.88	2.5	25	17	15	19	5.7	4.8	5.6	2	2.5	1	1.7	1.8	5.7	3.4	5.1	1.7	2.1	1	1.8	1.7	3.4	1.7	1.5	3.9	1.3	1.8	2.7	2.2	3.9	1.9	2.7	2.8	2	1.1	2.7	2	2	5.6	1	2.2	3.6
S28	PleasantHumans_surprise	43	female	90	420	17	3.88	2.5	25	17	15	19	5.7	4.8	5.6	2	2.5	1	1.7	1.8	5.7	3.4	5.1	1.7	2.1	1	1.8	1.7	3.4	1.7	1.5	3.9	1.3	1.8	2.7	2.2	3.9	1.9	2.7	2.8	2	1.1	2.7	2	2	5.6	1	2.2	3.6
S28	NeutralDogs_arousal	43	female	90	420	17	3.88	2.5	25	17	15	19	5.7	4.8	5.6	2	2.5	1	1.7	1.8	5.7	3.4	5.1	1.7	2.1	1	1.8	1.7	3.4	1.7	1.5	3.9	1.3	1.8	2.7	2.2	3.9	1.9	2.7	2.8	2	1.1	2.7	2	2	5.6	1	2.2	3.6
S28	NeutralDogs_happiness	43	female	90	420	17	3.88	2.5	25	17	15	19	5.7	4.8	5.6	2	2.5	1	1.7	1.8	5.7	3.4	5.1	1.7	2.1	1	1.8	1.7	3.4	1.7	1.5	3.9	1.3	1.8	2.7	2.2	3.9	1.9	2.7	2.8	2	1.1	2.7	2	2	5.6	1	2.2	3.6
S28	NeutralDogs_disgust	43	female	90	420	17	3.88	2.5	25	17	15	19	5.7	4.8	5.6	2	2.5	1	1.7	1.8	5.7	3.4	5.1	1.7	2.1	1	1.8	1.7	3.4	1.7	1.5	3.9	1.3	1.8	2.7	2.2	3.9	1.9	2.7	2.8	2	1.1	2.7	2	2	5.6	1	2.2	3.6
S28	NeutralDogs_fear	43	female	90	420	17	3.88	2.5	25	17	15	19	5.7	4.8	5.6	2	2.5	1	1.7	1.8	5.7	3.4	5.1	1.7	2.1	1	1.8	1.7	3.4	1.7	1.5	3.9	1.3	1.8	2.7	2.2	3.9	1.9	2.7	2.8	2	1.1	2.7	2	2	5.6	1	2.2	3.6
S28	NeutralDogs_sadness	43	female	90	420	17	3.88	2.5	25	17	15	19	5.7	4.8	5.6	2	2.5	1	1.7	1.8	5.7	3.4	5.1	1.7	2.1	1	1.8	1.7	3.4	1.7	1.5	3.9	1.3	1.8	2.7	2.2	3.9	1.9	2.7	2.8	2	1.1	2.7	2	2	5.6	1	2.2	3.6
S28	NeutralDogs_valence	43	female	90	420	17	3.88	2.5	25	17	15	19	5.7	4.8	5.6	2	2.5	1	1.7	1.8	5.7	3.4	5.1	1.7	2.1	1	1.8	1.7	3.4	1.7	1.5	3.9	1.3	1.8	2.7	2.2	3.9	1.9	2.7	2.8	2	1.1	2.7	2	2	5.6	1	2.2	3.6
S28	NeutralDogs_anger	43	female	90	420	17	3.88	2.5	25	17	15	19	5.7	4.8	5.6	2	2.5	1	1.7	1.8	5.7	3.4	5.1	1.7	2.1	1	1.8	1.7	3.4	1.7	1.5	3.9	1.3	1.8	2.7	2.2	3.9	1.9	2.7	2.8	2	1.1	2.7	2	2	5.6	1	2.2	3.6
S28	NeutralDogs_surprise	43	female	90	420	17	3.88	2.5	25	17	15	19	5.7	4.8	5.6	2	2.5	1	1.7	1.8	5.7	3.4	5.1	1.7	2.1	1	1.8	1.7	3.4	1.7	1.5	3.9	1.3	1.8	2.7	2.2	3.9	1.9	2.7	2.8	2	1.1	2.7	2	2	5.6	1	2.2	3.6
S28	NeutralHumans_arousal	43	female	90	420	17	3.88	2.5	25	17	15	19	5.7	4.8	5.6	2	2.5	1	1.7	1.8	5.7	3.4	5.1	1.7	2.1	1	1.8	1.7	3.4	1.7	1.5	3.9	1.3	1.8	2.7	2.2	3.9	1.9	2.7	2.8	2	1.1	2.7	2	2	5.6	1	2.2	3.6
S28	NeutralHumans_happiness	43	female	90	420	17	3.88	2.5	25	17	15	19	5.7	4.8	5.6	2	2.5	1	1.7	1.8	5.7	3.4	5.1	1.7	2.1	1	1.8	1.7	3.4	1.7	1.5	3.9	1.3	1.8	2.7	2.2	3.9	1.9	2.7	2.8	2	1.1	2.7	2	2	5.6	1	2.2	3.6
S28	NeutralHumans_disgust	43	female	90	420	17	3.88	2.5	25	17	15	19	5.7	4.8	5.6	2	2.5	1	1.7	1.8	5.7	3.4	5.1	1.7	2.1	1	1.8	1.7	3.4	1.7	1.5	3.9	1.3	1.8	2.7	2.2	3.9	1.9	2.7	2.8	2	1.1	2.7	2	2	5.6	1	2.2	3.6
S28	NeutralHumans_fear	43	female	90	420	17	3.88	2.5	25	17	15	19	5.7	4.8	5.6	2	2.5	1	1.7	1.8	5.7	3.4	5.1	1.7	2.1	1	1.8	1.7	3.4	1.7	1.5	3.9	1.3	1.8	2.7	2.2	3.9	1.9	2.7	2.8	2	1.1	2.7	2	2	5.6	1	2.2	3.6
S28	NeutralHumans_sadness	43	female	90	420	17	3.88	2.5	25	17	15	19	5.7	4.8	5.6	2	2.5	1	1.7	1.8	5.7	3.4	5.1	1.7	2.1	1	1.8	1.7	3.4	1.7	1.5	3.9	1.3	1.8	2.7	2.2	3.9	1.9	2.7	2.8	2	1.1	2.7	2	2	5.6	1	2.2	3.6
S28	NeutralHumans_valence	43	female	90	420	17	3.88	2.5	25	17	15	19	5.7	4.8	5.6	2	2.5	1	1.7	1.8	5.7	3.4	5.1	1.7	2.1	1	1.8	1.7	3.4	1.7	1.5	3.9	1.3	1.8	2.7	2.2	3.9	1.9	2.7	2.8	2	1.1	2.7	2	2	5.6	1	2.2	3.6
S28	NeutralHumans_anger	43	female	90	420	17	3.88	2.5	25	17	15	19	5.7	4.8	5.6	2	2.5	1	1.7	1.8	5.7	3.4	5.1	1.7	2.1	1	1.8	1.7	3.4	1.7	1.5	3.9	1.3	1.8	2.7	2.2	3.9	1.9	2.7	2.8	2	1.1	2.7	2	2	5.6	1	2.2	3.6
S28	NeutralHumans_surprise	43	female	90	420	17	3.88	2.5	25	17	15	19	5.7	4.8	5.6	2	2.5	1	1.7	1.8	5.7	3.4	5.1	1.7	2.1	1	1.8	1.7	3.4	1.7	1.5	3.9	1.3	1.8	2.7	2.2	3.9	1.9	2.7	2.8	2	1.1	2.7	2	2	5.6	1	2.2	3.6
S28	Object_arousal	43	female	90	420	17	3.88	2.5	25	17	15	19	5.7	4.8	5.6	2	2.5	1	1.7	1.8	5.7	3.4	5.1	1.7	2.1	1	1.8	1.7	3.4	1.7	1.5	3.9	1.3	1.8	2.7	2.2	3.9	1.9	2.7	2.8	2	1.1	2.7	2	2	5.6	1	2.2	3.6
S28	Object_happiness	43	female	90	420	17	3.88	2.5	25	17	15	19	5.7	4.8	5.6	2	2.5	1	1.7	1.8	5.7	3.4	5.1	1.7	2.1	1	1.8	1.7	3.4	1.7	1.5	3.9	1.3	1.8	2.7	2.2	3.9	1.9	2.7	2.8	2	1.1	2.7	2	2	5.6	1	2.2	3.6
S28	Object_disgust	43	female	90	420	17	3.88	2.5	25	17	15	19	5.7	4.8	5.6	2	2.5	1	1.7	1.8	5.7	3.4	5.1	1.7	2.1	1	1.8	1.7	3.4	1.7	1.5	3.9	1.3	1.8	2.7	2.2	3.9	1.9	2.7	2.8	2	1.1	2.7	2	2	5.6	1	2.2	3.6
S28	Object_fear	43	female	90	420	17	3.88	2.5	25	17	15	19	5.7	4.8	5.6	2	2.5	1	1.7	1.8	5.7	3.4	5.1	1.7	2.1	1	1.8	1.7	3.4	1.7	1.5	3.9	1.3	1.8	2.7	2.2	3.9	1.9	2.7	2.8	2	1.1	2.7	2	2	5.6	1	2.2	3.6
S28	Object_sadness	43	female	90	420	17	3.88	2.5	25	17	15	19	5.7	4.8	5.6	2	2.5	1	1.7	1.8	5.7	3.4	5.1	1.7	2.1	1	1.8	1.7	3.4	1.7	1.5	3.9	1.3	1.8	2.7	2.2	3.9	1.9	2.7	2.8	2	1.1	2.7	2	2	5.6	1	2.2	3.6
S28	Object_valence	43	female	90	420	17	3.88	2.5	25	17	15	19	5.7	4.8	5.6	2	2.5	1	1.7	1.8	5.7	3.4	5.1	1.7	2.1	1	1.8	1.7	3.4	1.7	1.5	3.9	1.3	1.8	2.7	2.2	3.9	1.9	2.7	2.8	2	1.1	2.7	2	2	5.6	1	2.2	3.6
S28	Object_anger	43	female	90	420	17	3.88	2.5	25	17	15	19	5.7	4.8	5.6	2	2.5	1	1.7	1.8	5.7	3.4	5.1	1.7	2.1	1	1.8	1.7	3.4	1.7	1.5	3.9	1.3	1.8	2.7	2.2	3.9	1.9	2.7	2.8	2	1.1	2.7	2	2	5.6	1	2.2	3.6
S28	Object_surprise	43	female	90	420	17	3.88	2.5	25	17	15	19	5.7	4.8	5.6	2	2.5	1	1.7	1.8	5.7	3.4	5.1	1.7	2.1	1	1.8	1.7	3.4	1.7	1.5	3.9	1.3	1.8	2.7	2.2	3.9	1.9	2.7	2.8	2	1.1	2.7	2	2	5.6	1	2.2	3.6
S28	Pixel_arousal	43	female	90	420	17	3.88	2.5	25	17	15	19	5.7	4.8	5.6	2	2.5	1	1.7	1.8	5.7	3.4	5.1	1.7	2.1	1	1.8	1.7	3.4	1.7	1.5	3.9	1.3	1.8	2.7	2.2	3.9	1.9	2.7	2.8	2	1.1	2.7	2	2	5.6	1	2.2	3.6
S28	Pixel_happiness	43	female	90	420	17	3.88	2.5	25	17	15	19	5.7	4.8	5.6	2	2.5	1	1.7	1.8	5.7	3.4	5.1	1.7	2.1	1	1.8	1.7	3.4	1.7	1.5	3.9	1.3	1.8	2.7	2.2	3.9	1.9	2.7	2.8	2	1.1	2.7	2	2	5.6	1	2.2	3.6
S28	Pixel_disgust	43	female	90	420	17	3.88	2.5	25	17	15	19	5.7	4.8	5.6	2	2.5	1	1.7	1.8	5.7	3.4	5.1	1.7	2.1	1	1.8	1.7	3.4	1.7	1.5	3.9	1.3	1.8	2.7	2.2	3.9	1.9	2.7	2.8	2	1.1	2.7	2	2	5.6	1	2.2	3.6
S28	Pixel_fear	43	female	90	420	17	3.88	2.5	25	17	15	19	5.7	4.8	5.6	2	2.5	1	1.7	1.8	5.7	3.4	5.1	1.7	2.1	1	1.8	1.7	3.4	1.7	1.5	3.9	1.3	1.8	2.7	2.2	3.9	1.9	2.7	2.8	2	1.1	2.7	2	2	5.6	1	2.2	3.6
S28	Pixel_sadness	43	female	90	420	17	3.88	2.5	25	17	15	19	5.7	4.8	5.6	2	2.5	1	1.7	1.8	5.7	3.4	5.1	1.7	2.1	1	1.8	1.7	3.4	1.7	1.5	3.9	1.3	1.8	2.7	2.2	3.9	1.9	2.7	2.8	2	1.1	2.7	2	2	5.6	1	2.2	3.6
S28	Pixel_valence	43	female	90	420	17	3.88	2.5	25	17	15	19	5.7	4.8	5.6	2	2.5	1	1.7	1.8	5.7	3.4	5.1	1.7	2.1	1	1.8	1.7	3.4	1.7	1.5	3.9	1.3	1.8	2.7	2.2	3.9	1.9	2.7	2.8	2	1.1	2.7	2	2	5.6	1	2.2	3.6
S28	Pixel_anger	43	female	90	420	17	3.88	2.5	25	17	15	19	5.7	4.8	5.6	2	2.5	1	1.7	1.8	5.7	3.4	5.1	1.7	2.1	1	1.8	1.7	3.4	1.7	1.5	3.9	1.3	1.8	2.7	2.2	3.9	1.9	2.7	2.8	2	1.1	2.7	2	2	5.6	1	2.2	3.6
S28	Pixel_surprise	43	female	90	420	17	3.88	2.5	25	17	15	19	5.7	4.8	5.6	2	2.5	1	1.7	1.8	5.7	3.4	5.1	1.7	2.1	1	1.8	1.7	3.4	1.7	1.5	3.9	1.3	1.8	2.7	2.2	3.9	1.9	2.7	2.8	2	1.1	2.7	2	2	5.6	1	2.2	3.6
S29	ThreateningDogs_arousal	43	female	-60	422	16	4.13	3	15	12	19	17	4.8	4.2	4	1.1	2.6	1	1	1	5.3	4.9	4.5	1.2	3.3	1	1	1.1	3.6	3.5	1.5	3.2	2.2	1.6	1.9	1.4	4.2	4.3	2.9	1.7	3	1.2	1.1	1.1	2.7	4.7	1.2	2	3
S29	ThreateningDogs_happiness	43	female	-60	422	16	4.13	3	15	12	19	17	4.8	4.2	4	1.1	2.6	1	1	1	5.3	4.9	4.5	1.2	3.3	1	1	1.1	3.6	3.5	1.5	3.2	2.2	1.6	1.9	1.4	4.2	4.3	2.9	1.7	3	1.2	1.1	1.1	2.7	4.7	1.2	2	3
S29	ThreateningDogs_disgust	43	female	-60	422	16	4.13	3	15	12	19	17	4.8	4.2	4	1.1	2.6	1	1	1	5.3	4.9	4.5	1.2	3.3	1	1	1.1	3.6	3.5	1.5	3.2	2.2	1.6	1.9	1.4	4.2	4.3	2.9	1.7	3	1.2	1.1	1.1	2.7	4.7	1.2	2	3
S29	ThreateningDogs_fear	43	female	-60	422	16	4.13	3	15	12	19	17	4.8	4.2	4	1.1	2.6	1	1	1	5.3	4.9	4.5	1.2	3.3	1	1	1.1	3.6	3.5	1.5	3.2	2.2	1.6	1.9	1.4	4.2	4.3	2.9	1.7	3	1.2	1.1	1.1	2.7	4.7	1.2	2	3
S29	ThreateningDogs_sadness	43	female	-60	422	16	4.13	3	15	12	19	17	4.8	4.2	4	1.1	2.6	1	1	1	5.3	4.9	4.5	1.2	3.3	1	1	1.1	3.6	3.5	1.5	3.2	2.2	1.6	1.9	1.4	4.2	4.3	2.9	1.7	3	1.2	1.1	1.1	2.7	4.7	1.2	2	3
S29	ThreateningDogs_valence	43	female	-60	422	16	4.13	3	15	12	19	17	4.8	4.2	4	1.1	2.6	1	1	1	5.3	4.9	4.5	1.2	3.3	1	1	1.1	3.6	3.5	1.5	3.2	2.2	1.6	1.9	1.4	4.2	4.3	2.9	1.7	3	1.2	1.1	1.1	2.7	4.7	1.2	2	3
S29	ThreateningDogs_anger	43	female	-60	422	16	4.13	3	15	12	19	17	4.8	4.2	4	1.1	2.6	1	1	1	5.3	4.9	4.5	1.2	3.3	1	1	1.1	3.6	3.5	1.5	3.2	2.2	1.6	1.9	1.4	4.2	4.3	2.9	1.7	3	1.2	1.1	1.1	2.7	4.7	1.2	2	3
S29	ThreateningDogs_surprise	43	female	-60	422	16	4.13	3	15	12	19	17	4.8	4.2	4	1.1	2.6	1	1	1	5.3	4.9	4.5	1.2	3.3	1	1	1.1	3.6	3.5	1.5	3.2	2.2	1.6	1.9	1.4	4.2	4.3	2.9	1.7	3	1.2	1.1	1.1	2.7	4.7	1.2	2	3
S29	ThreateningHumans_arousal	43	female	-60	422	16	4.13	3	15	12	19	17	4.8	4.2	4	1.1	2.6	1	1	1	5.3	4.9	4.5	1.2	3.3	1	1	1.1	3.6	3.5	1.5	3.2	2.2	1.6	1.9	1.4	4.2	4.3	2.9	1.7	3	1.2	1.1	1.1	2.7	4.7	1.2	2	3
S29	ThreateningHumans_happiness	43	female	-60	422	16	4.13	3	15	12	19	17	4.8	4.2	4	1.1	2.6	1	1	1	5.3	4.9	4.5	1.2	3.3	1	1	1.1	3.6	3.5	1.5	3.2	2.2	1.6	1.9	1.4	4.2	4.3	2.9	1.7	3	1.2	1.1	1.1	2.7	4.7	1.2	2	3
S29	ThreateningHumans_disgust	43	female	-60	422	16	4.13	3	15	12	19	17	4.8	4.2	4	1.1	2.6	1	1	1	5.3	4.9	4.5	1.2	3.3	1	1	1.1	3.6	3.5	1.5	3.2	2.2	1.6	1.9	1.4	4.2	4.3	2.9	1.7	3	1.2	1.1	1.1	2.7	4.7	1.2	2	3
S29	ThreateningHumans_fear	43	female	-60	422	16	4.13	3	15	12	19	17	4.8	4.2	4	1.1	2.6	1	1	1	5.3	4.9	4.5	1.2	3.3	1	1	1.1	3.6	3.5	1.5	3.2	2.2	1.6	1.9	1.4	4.2	4.3	2.9	1.7	3	1.2	1.1	1.1	2.7	4.7	1.2	2	3
S29	ThreateningHumans_sadness	43	female	-60	422	16	4.13	3	15	12	19	17	4.8	4.2	4	1.1	2.6	1	1	1	5.3	4.9	4.5	1.2	3.3	1	1	1.1	3.6	3.5	1.5	3.2	2.2	1.6	1.9	1.4	4.2	4.3	2.9	1.7	3	1.2	1.1	1.1	2.7	4.7	1.2	2	3
S29	ThreateningHumans_valence	43	female	-60	422	16	4.13	3	15	12	19	17	4.8	4.2	4	1.1	2.6	1	1	1	5.3	4.9	4.5	1.2	3.3	1	1	1.1	3.6	3.5	1.5	3.2	2.2	1.6	1.9	1.4	4.2	4.3	2.9	1.7	3	1.2	1.1	1.1	2.7	4.7	1.2	2	3
S29	ThreateningHumans_anger	43	female	-60	422	16	4.13	3	15	12	19	17	4.8	4.2	4	1.1	2.6	1	1	1	5.3	4.9	4.5	1.2	3.3	1	1	1.1	3.6	3.5	1.5	3.2	2.2	1.6	1.9	1.4	4.2	4.3	2.9	1.7	3	1.2	1.1	1.1	2.7	4.7	1.2	2	3
S29	ThreateningHumans_surprise	43	female	-60	422	16	4.13	3	15	12	19	17	4.8	4.2	4	1.1	2.6	1	1	1	5.3	4.9	4.5	1.2	3.3	1	1	1.1	3.6	3.5	1.5	3.2	2.2	1.6	1.9	1.4	4.2	4.3	2.9	1.7	3	1.2	1.1	1.1	2.7	4.7	1.2	2	3
S29	PleasantDogs_arousal	43	female	-60	422	16	4.13	3	15	12	19	17	4.8	4.2	4	1.1	2.6	1	1	1	5.3	4.9	4.5	1.2	3.3	1	1	1.1	3.6	3.5	1.5	3.2	2.2	1.6	1.9	1.4	4.2	4.3	2.9	1.7	3	1.2	1.1	1.1	2.7	4.7	1.2	2	3
S29	PleasantDogs_happiness	43	female	-60	422	16	4.13	3	15	12	19	17	4.8	4.2	4	1.1	2.6	1	1	1	5.3	4.9	4.5	1.2	3.3	1	1	1.1	3.6	3.5	1.5	3.2	2.2	1.6	1.9	1.4	4.2	4.3	2.9	1.7	3	1.2	1.1	1.1	2.7	4.7	1.2	2	3
S29	PleasantDogs_disgust	43	female	-60	422	16	4.13	3	15	12	19	17	4.8	4.2	4	1.1	2.6	1	1	1	5.3	4.9	4.5	1.2	3.3	1	1	1.1	3.6	3.5	1.5	3.2	2.2	1.6	1.9	1.4	4.2	4.3	2.9	1.7	3	1.2	1.1	1.1	2.7	4.7	1.2	2	3
S29	PleasantDogs_fear	43	female	-60	422	16	4.13	3	15	12	19	17	4.8	4.2	4	1.1	2.6	1	1	1	5.3	4.9	4.5	1.2	3.3	1	1	1.1	3.6	3.5	1.5	3.2	2.2	1.6	1.9	1.4	4.2	4.3	2.9	1.7	3	1.2	1.1	1.1	2.7	4.7	1.2	2	3
S29	PleasantDogs_sadness	43	female	-60	422	16	4.13	3	15	12	19	17	4.8	4.2	4	1.1	2.6	1	1	1	5.3	4.9	4.5	1.2	3.3	1	1	1.1	3.6	3.5	1.5	3.2	2.2	1.6	1.9	1.4	4.2	4.3	2.9	1.7	3	1.2	1.1	1.1	2.7	4.7	1.2	2	3
S29	PleasantDogs_valence	43	female	-60	422	16	4.13	3	15	12	19	17	4.8	4.2	4	1.1	2.6	1	1	1	5.3	4.9	4.5	1.2	3.3	1	1	1.1	3.6	3.5	1.5	3.2	2.2	1.6	1.9	1.4	4.2	4.3	2.9	1.7	3	1.2	1.1	1.1	2.7	4.7	1.2	2	3
S29	PleasantDogs_anger	43	female	-60	422	16	4.13	3	15	12	19	17	4.8	4.2	4	1.1	2.6	1	1	1	5.3	4.9	4.5	1.2	3.3	1	1	1.1	3.6	3.5	1.5	3.2	2.2	1.6	1.9	1.4	4.2	4.3	2.9	1.7	3	1.2	1.1	1.1	2.7	4.7	1.2	2	3
S29	PleasantDogs_surprise	43	female	-60	422	16	4.13	3	15	12	19	17	4.8	4.2	4	1.1	2.6	1	1	1	5.3	4.9	4.5	1.2	3.3	1	1	1.1	3.6	3.5	1.5	3.2	2.2	1.6	1.9	1.4	4.2	4.3	2.9	1.7	3	1.2	1.1	1.1	2.7	4.7	1.2	2	3
S29	PleasantHumans_arousal	43	female	-60	422	16	4.13	3	15	12	19	17	4.8	4.2	4	1.1	2.6	1	1	1	5.3	4.9	4.5	1.2	3.3	1	1	1.1	3.6	3.5	1.5	3.2	2.2	1.6	1.9	1.4	4.2	4.3	2.9	1.7	3	1.2	1.1	1.1	2.7	4.7	1.2	2	3
S29	PleasantHumans_happiness	43	female	-60	422	16	4.13	3	15	12	19	17	4.8	4.2	4	1.1	2.6	1	1	1	5.3	4.9	4.5	1.2	3.3	1	1	1.1	3.6	3.5	1.5	3.2	2.2	1.6	1.9	1.4	4.2	4.3	2.9	1.7	3	1.2	1.1	1.1	2.7	4.7	1.2	2	3
S29	PleasantHumans_disgust	43	female	-60	422	16	4.13	3	15	12	19	17	4.8	4.2	4	1.1	2.6	1	1	1	5.3	4.9	4.5	1.2	3.3	1	1	1.1	3.6	3.5	1.5	3.2	2.2	1.6	1.9	1.4	4.2	4.3	2.9	1.7	3	1.2	1.1	1.1	2.7	4.7	1.2	2	3
S29	PleasantHumans_fear	43	female	-60	422	16	4.13	3	15	12	19	17	4.8	4.2	4	1.1	2.6	1	1	1	5.3	4.9	4.5	1.2	3.3	1	1	1.1	3.6	3.5	1.5	3.2	2.2	1.6	1.9	1.4	4.2	4.3	2.9	1.7	3	1.2	1.1	1.1	2.7	4.7	1.2	2	3
S29	PleasantHumans_sadness	43	female	-60	422	16	4.13	3	15	12	19	17	4.8	4.2	4	1.1	2.6	1	1	1	5.3	4.9	4.5	1.2	3.3	1	1	1.1	3.6	3.5	1.5	3.2	2.2	1.6	1.9	1.4	4.2	4.3	2.9	1.7	3	1.2	1.1	1.1	2.7	4.7	1.2	2	3
S29	PleasantHumans_valence	43	female	-60	422	16	4.13	3	15	12	19	17	4.8	4.2	4	1.1	2.6	1	1	1	5.3	4.9	4.5	1.2	3.3	1	1	1.1	3.6	3.5	1.5	3.2	2.2	1.6	1.9	1.4	4.2	4.3	2.9	1.7	3	1.2	1.1	1.1	2.7	4.7	1.2	2	3
S29	PleasantHumans_anger	43	female	-60	422	16	4.13	3	15	12	19	17	4.8	4.2	4	1.1	2.6	1	1	1	5.3	4.9	4.5	1.2	3.3	1	1	1.1	3.6	3.5	1.5	3.2	2.2	1.6	1.9	1.4	4.2	4.3	2.9	1.7	3	1.2	1.1	1.1	2.7	4.7	1.2	2	3
S29	PleasantHumans_surprise	43	female	-60	422	16	4.13	3	15	12	19	17	4.8	4.2	4	1.1	2.6	1	1	1	5.3	4.9	4.5	1.2	3.3	1	1	1.1	3.6	3.5	1.5	3.2	2.2	1.6	1.9	1.4	4.2	4.3	2.9	1.7	3	1.2	1.1	1.1	2.7	4.7	1.2	2	3
S29	NeutralDogs_arousal	43	female	-60	422	16	4.13	3	15	12	19	17	4.8	4.2	4	1.1	2.6	1	1	1	5.3	4.9	4.5	1.2	3.3	1	1	1.1	3.6	3.5	1.5	3.2	2.2	1.6	1.9	1.4	4.2	4.3	2.9	1.7	3	1.2	1.1	1.1	2.7	4.7	1.2	2	3
S29	NeutralDogs_happiness	43	female	-60	422	16	4.13	3	15	12	19	17	4.8	4.2	4	1.1	2.6	1	1	1	5.3	4.9	4.5	1.2	3.3	1	1	1.1	3.6	3.5	1.5	3.2	2.2	1.6	1.9	1.4	4.2	4.3	2.9	1.7	3	1.2	1.1	1.1	2.7	4.7	1.2	2	3
S29	NeutralDogs_disgust	43	female	-60	422	16	4.13	3	15	12	19	17	4.8	4.2	4	1.1	2.6	1	1	1	5.3	4.9	4.5	1.2	3.3	1	1	1.1	3.6	3.5	1.5	3.2	2.2	1.6	1.9	1.4	4.2	4.3	2.9	1.7	3	1.2	1.1	1.1	2.7	4.7	1.2	2	3
S29	NeutralDogs_fear	43	female	-60	422	16	4.13	3	15	12	19	17	4.8	4.2	4	1.1	2.6	1	1	1	5.3	4.9	4.5	1.2	3.3	1	1	1.1	3.6	3.5	1.5	3.2	2.2	1.6	1.9	1.4	4.2	4.3	2.9	1.7	3	1.2	1.1	1.1	2.7	4.7	1.2	2	3
S29	NeutralDogs_sadness	43	female	-60	422	16	4.13	3	15	12	19	17	4.8	4.2	4	1.1	2.6	1	1	1	5.3	4.9	4.5	1.2	3.3	1	1	1.1	3.6	3.5	1.5	3.2	2.2	1.6	1.9	1.4	4.2	4.3	2.9	1.7	3	1.2	1.1	1.1	2.7	4.7	1.2	2	3
S29	NeutralDogs_valence	43	female	-60	422	16	4.13	3	15	12	19	17	4.8	4.2	4	1.1	2.6	1	1	1	5.3	4.9	4.5	1.2	3.3	1	1	1.1	3.6	3.5	1.5	3.2	2.2	1.6	1.9	1.4	4.2	4.3	2.9	1.7	3	1.2	1.1	1.1	2.7	4.7	1.2	2	3
S29	NeutralDogs_anger	43	female	-60	422	16	4.13	3	15	12	19	17	4.8	4.2	4	1.1	2.6	1	1	1	5.3	4.9	4.5	1.2	3.3	1	1	1.1	3.6	3.5	1.5	3.2	2.2	1.6	1.9	1.4	4.2	4.3	2.9	1.7	3	1.2	1.1	1.1	2.7	4.7	1.2	2	3
S29	NeutralDogs_surprise	43	female	-60	422	16	4.13	3	15	12	19	17	4.8	4.2	4	1.1	2.6	1	1	1	5.3	4.9	4.5	1.2	3.3	1	1	1.1	3.6	3.5	1.5	3.2	2.2	1.6	1.9	1.4	4.2	4.3	2.9	1.7	3	1.2	1.1	1.1	2.7	4.7	1.2	2	3
S29	NeutralHumans_arousal	43	female	-60	422	16	4.13	3	15	12	19	17	4.8	4.2	4	1.1	2.6	1	1	1	5.3	4.9	4.5	1.2	3.3	1	1	1.1	3.6	3.5	1.5	3.2	2.2	1.6	1.9	1.4	4.2	4.3	2.9	1.7	3	1.2	1.1	1.1	2.7	4.7	1.2	2	3
S29	NeutralHumans_happiness	43	female	-60	422	16	4.13	3	15	12	19	17	4.8	4.2	4	1.1	2.6	1	1	1	5.3	4.9	4.5	1.2	3.3	1	1	1.1	3.6	3.5	1.5	3.2	2.2	1.6	1.9	1.4	4.2	4.3	2.9	1.7	3	1.2	1.1	1.1	2.7	4.7	1.2	2	3
S29	NeutralHumans_disgust	43	female	-60	422	16	4.13	3	15	12	19	17	4.8	4.2	4	1.1	2.6	1	1	1	5.3	4.9	4.5	1.2	3.3	1	1	1.1	3.6	3.5	1.5	3.2	2.2	1.6	1.9	1.4	4.2	4.3	2.9	1.7	3	1.2	1.1	1.1	2.7	4.7	1.2	2	3
S29	NeutralHumans_fear	43	female	-60	422	16	4.13	3	15	12	19	17	4.8	4.2	4	1.1	2.6	1	1	1	5.3	4.9	4.5	1.2	3.3	1	1	1.1	3.6	3.5	1.5	3.2	2.2	1.6	1.9	1.4	4.2	4.3	2.9	1.7	3	1.2	1.1	1.1	2.7	4.7	1.2	2	3
S29	NeutralHumans_sadness	43	female	-60	422	16	4.13	3	15	12	19	17	4.8	4.2	4	1.1	2.6	1	1	1	5.3	4.9	4.5	1.2	3.3	1	1	1.1	3.6	3.5	1.5	3.2	2.2	1.6	1.9	1.4	4.2	4.3	2.9	1.7	3	1.2	1.1	1.1	2.7	4.7	1.2	2	3
S29	NeutralHumans_valence	43	female	-60	422	16	4.13	3	15	12	19	17	4.8	4.2	4	1.1	2.6	1	1	1	5.3	4.9	4.5	1.2	3.3	1	1	1.1	3.6	3.5	1.5	3.2	2.2	1.6	1.9	1.4	4.2	4.3	2.9	1.7	3	1.2	1.1	1.1	2.7	4.7	1.2	2	3
S29	NeutralHumans_anger	43	female	-60	422	16	4.13	3	15	12	19	17	4.8	4.2	4	1.1	2.6	1	1	1	5.3	4.9	4.5	1.2	3.3	1	1	1.1	3.6	3.5	1.5	3.2	2.2	1.6	1.9	1.4	4.2	4.3	2.9	1.7	3	1.2	1.1	1.1	2.7	4.7	1.2	2	3
S29	NeutralHumans_surprise	43	female	-60	422	16	4.13	3	15	12	19	17	4.8	4.2	4	1.1	2.6	1	1	1	5.3	4.9	4.5	1.2	3.3	1	1	1.1	3.6	3.5	1.5	3.2	2.2	1.6	1.9	1.4	4.2	4.3	2.9	1.7	3	1.2	1.1	1.1	2.7	4.7	1.2	2	3
S29	Object_arousal	43	female	-60	422	16	4.13	3	15	12	19	17	4.8	4.2	4	1.1	2.6	1	1	1	5.3	4.9	4.5	1.2	3.3	1	1	1.1	3.6	3.5	1.5	3.2	2.2	1.6	1.9	1.4	4.2	4.3	2.9	1.7	3	1.2	1.1	1.1	2.7	4.7	1.2	2	3
S29	Object_happiness	43	female	-60	422	16	4.13	3	15	12	19	17	4.8	4.2	4	1.1	2.6	1	1	1	5.3	4.9	4.5	1.2	3.3	1	1	1.1	3.6	3.5	1.5	3.2	2.2	1.6	1.9	1.4	4.2	4.3	2.9	1.7	3	1.2	1.1	1.1	2.7	4.7	1.2	2	3
S29	Object_disgust	43	female	-60	422	16	4.13	3	15	12	19	17	4.8	4.2	4	1.1	2.6	1	1	1	5.3	4.9	4.5	1.2	3.3	1	1	1.1	3.6	3.5	1.5	3.2	2.2	1.6	1.9	1.4	4.2	4.3	2.9	1.7	3	1.2	1.1	1.1	2.7	4.7	1.2	2	3
S29	Object_fear	43	female	-60	422	16	4.13	3	15	12	19	17	4.8	4.2	4	1.1	2.6	1	1	1	5.3	4.9	4.5	1.2	3.3	1	1	1.1	3.6	3.5	1.5	3.2	2.2	1.6	1.9	1.4	4.2	4.3	2.9	1.7	3	1.2	1.1	1.1	2.7	4.7	1.2	2	3
S29	Object_sadness	43	female	-60	422	16	4.13	3	15	12	19	17	4.8	4.2	4	1.1	2.6	1	1	1	5.3	4.9	4.5	1.2	3.3	1	1	1.1	3.6	3.5	1.5	3.2	2.2	1.6	1.9	1.4	4.2	4.3	2.9	1.7	3	1.2	1.1	1.1	2.7	4.7	1.2	2	3
S29	Object_valence	43	female	-60	422	16	4.13	3	15	12	19	17	4.8	4.2	4	1.1	2.6	1	1	1	5.3	4.9	4.5	1.2	3.3	1	1	1.1	3.6	3.5	1.5	3.2	2.2	1.6	1.9	1.4	4.2	4.3	2.9	1.7	3	1.2	1.1	1.1	2.7	4.7	1.2	2	3
S29	Object_anger	43	female	-60	422	16	4.13	3	15	12	19	17	4.8	4.2	4	1.1	2.6	1	1	1	5.3	4.9	4.5	1.2	3.3	1	1	1.1	3.6	3.5	1.5	3.2	2.2	1.6	1.9	1.4	4.2	4.3	2.9	1.7	3	1.2	1.1	1.1	2.7	4.7	1.2	2	3
S29	Object_surprise	43	female	-60	422	16	4.13	3	15	12	19	17	4.8	4.2	4	1.1	2.6	1	1	1	5.3	4.9	4.5	1.2	3.3	1	1	1.1	3.6	3.5	1.5	3.2	2.2	1.6	1.9	1.4	4.2	4.3	2.9	1.7	3	1.2	1.1	1.1	2.7	4.7	1.2	2	3
S29	Pixel_arousal	43	female	-60	422	16	4.13	3	15	12	19	17	4.8	4.2	4	1.1	2.6	1	1	1	5.3	4.9	4.5	1.2	3.3	1	1	1.1	3.6	3.5	1.5	3.2	2.2	1.6	1.9	1.4	4.2	4.3	2.9	1.7	3	1.2	1.1	1.1	2.7	4.7	1.2	2	3
S29	Pixel_happiness	43	female	-60	422	16	4.13	3	15	12	19	17	4.8	4.2	4	1.1	2.6	1	1	1	5.3	4.9	4.5	1.2	3.3	1	1	1.1	3.6	3.5	1.5	3.2	2.2	1.6	1.9	1.4	4.2	4.3	2.9	1.7	3	1.2	1.1	1.1	2.7	4.7	1.2	2	3
S29	Pixel_disgust	43	female	-60	422	16	4.13	3	15	12	19	17	4.8	4.2	4	1.1	2.6	1	1	1	5.3	4.9	4.5	1.2	3.3	1	1	1.1	3.6	3.5	1.5	3.2	2.2	1.6	1.9	1.4	4.2	4.3	2.9	1.7	3	1.2	1.1	1.1	2.7	4.7	1.2	2	3
S29	Pixel_fear	43	female	-60	422	16	4.13	3	15	12	19	17	4.8	4.2	4	1.1	2.6	1	1	1	5.3	4.9	4.5	1.2	3.3	1	1	1.1	3.6	3.5	1.5	3.2	2.2	1.6	1.9	1.4	4.2	4.3	2.9	1.7	3	1.2	1.1	1.1	2.7	4.7	1.2	2	3
S29	Pixel_sadness	43	female	-60	422	16	4.13	3	15	12	19	17	4.8	4.2	4	1.1	2.6	1	1	1	5.3	4.9	4.5	1.2	3.3	1	1	1.1	3.6	3.5	1.5	3.2	2.2	1.6	1.9	1.4	4.2	4.3	2.9	1.7	3	1.2	1.1	1.1	2.7	4.7	1.2	2	3
S29	Pixel_valence	43	female	-60	422	16	4.13	3	15	12	19	17	4.8	4.2	4	1.1	2.6	1	1	1	5.3	4.9	4.5	1.2	3.3	1	1	1.1	3.6	3.5	1.5	3.2	2.2	1.6	1.9	1.4	4.2	4.3	2.9	1.7	3	1.2	1.1	1.1	2.7	4.7	1.2	2	3
S29	Pixel_anger	43	female	-60	422	16	4.13	3	15	12	19	17	4.8	4.2	4	1.1	2.6	1	1	1	5.3	4.9	4.5	1.2	3.3	1	1	1.1	3.6	3.5	1.5	3.2	2.2	1.6	1.9	1.4	4.2	4.3	2.9	1.7	3	1.2	1.1	1.1	2.7	4.7	1.2	2	3
S29	Pixel_surprise	43	female	-60	422	16	4.13	3	15	12	19	17	4.8	4.2	4	1.1	2.6	1	1	1	5.3	4.9	4.5	1.2	3.3	1	1	1.1	3.6	3.5	1.5	3.2	2.2	1.6	1.9	1.4	4.2	4.3	2.9	1.7	3	1.2	1.1	1.1	2.7	4.7	1.2	2	3
S30	ThreateningDogs_arousal	40	male	90	329	7	2.75	3.25	18	19	15	15	6.2	4.1	5.3	1.1	1.4	1	1	1	6.4	4.5	5.3	1	1	1	1	1	4.1	1.9	2.1	2.3	1	1.1	1.1	1	4.6	1.8	2.5	1.4	1	1	1	1	2.3	5	1	2.2	1.3
S30	ThreateningDogs_happiness	40	male	90	329	7	2.75	3.25	18	19	15	15	6.2	4.1	5.3	1.1	1.4	1	1	1	6.4	4.5	5.3	1	1	1	1	1	4.1	1.9	2.1	2.3	1	1.1	1.1	1	4.6	1.8	2.5	1.4	1	1	1	1	2.3	5	1	2.2	1.3
S30	ThreateningDogs_disgust	40	male	90	329	7	2.75	3.25	18	19	15	15	6.2	4.1	5.3	1.1	1.4	1	1	1	6.4	4.5	5.3	1	1	1	1	1	4.1	1.9	2.1	2.3	1	1.1	1.1	1	4.6	1.8	2.5	1.4	1	1	1	1	2.3	5	1	2.2	1.3
S30	ThreateningDogs_fear	40	male	90	329	7	2.75	3.25	18	19	15	15	6.2	4.1	5.3	1.1	1.4	1	1	1	6.4	4.5	5.3	1	1	1	1	1	4.1	1.9	2.1	2.3	1	1.1	1.1	1	4.6	1.8	2.5	1.4	1	1	1	1	2.3	5	1	2.2	1.3
S30	ThreateningDogs_sadness	40	male	90	329	7	2.75	3.25	18	19	15	15	6.2	4.1	5.3	1.1	1.4	1	1	1	6.4	4.5	5.3	1	1	1	1	1	4.1	1.9	2.1	2.3	1	1.1	1.1	1	4.6	1.8	2.5	1.4	1	1	1	1	2.3	5	1	2.2	1.3
S30	ThreateningDogs_valence	40	male	90	329	7	2.75	3.25	18	19	15	15	6.2	4.1	5.3	1.1	1.4	1	1	1	6.4	4.5	5.3	1	1	1	1	1	4.1	1.9	2.1	2.3	1	1.1	1.1	1	4.6	1.8	2.5	1.4	1	1	1	1	2.3	5	1	2.2	1.3
S30	ThreateningDogs_anger	40	male	90	329	7	2.75	3.25	18	19	15	15	6.2	4.1	5.3	1.1	1.4	1	1	1	6.4	4.5	5.3	1	1	1	1	1	4.1	1.9	2.1	2.3	1	1.1	1.1	1	4.6	1.8	2.5	1.4	1	1	1	1	2.3	5	1	2.2	1.3
S30	ThreateningDogs_surprise	40	male	90	329	7	2.75	3.25	18	19	15	15	6.2	4.1	5.3	1.1	1.4	1	1	1	6.4	4.5	5.3	1	1	1	1	1	4.1	1.9	2.1	2.3	1	1.1	1.1	1	4.6	1.8	2.5	1.4	1	1	1	1	2.3	5	1	2.2	1.3
S30	ThreateningHumans_arousal	40	male	90	329	7	2.75	3.25	18	19	15	15	6.2	4.1	5.3	1.1	1.4	1	1	1	6.4	4.5	5.3	1	1	1	1	1	4.1	1.9	2.1	2.3	1	1.1	1.1	1	4.6	1.8	2.5	1.4	1	1	1	1	2.3	5	1	2.2	1.3
S30	ThreateningHumans_happiness	40	male	90	329	7	2.75	3.25	18	19	15	15	6.2	4.1	5.3	1.1	1.4	1	1	1	6.4	4.5	5.3	1	1	1	1	1	4.1	1.9	2.1	2.3	1	1.1	1.1	1	4.6	1.8	2.5	1.4	1	1	1	1	2.3	5	1	2.2	1.3
S30	ThreateningHumans_disgust	40	male	90	329	7	2.75	3.25	18	19	15	15	6.2	4.1	5.3	1.1	1.4	1	1	1	6.4	4.5	5.3	1	1	1	1	1	4.1	1.9	2.1	2.3	1	1.1	1.1	1	4.6	1.8	2.5	1.4	1	1	1	1	2.3	5	1	2.2	1.3
S30	ThreateningHumans_fear	40	male	90	329	7	2.75	3.25	18	19	15	15	6.2	4.1	5.3	1.1	1.4	1	1	1	6.4	4.5	5.3	1	1	1	1	1	4.1	1.9	2.1	2.3	1	1.1	1.1	1	4.6	1.8	2.5	1.4	1	1	1	1	2.3	5	1	2.2	1.3
S30	ThreateningHumans_sadness	40	male	90	329	7	2.75	3.25	18	19	15	15	6.2	4.1	5.3	1.1	1.4	1	1	1	6.4	4.5	5.3	1	1	1	1	1	4.1	1.9	2.1	2.3	1	1.1	1.1	1	4.6	1.8	2.5	1.4	1	1	1	1	2.3	5	1	2.2	1.3
S30	ThreateningHumans_valence	40	male	90	329	7	2.75	3.25	18	19	15	15	6.2	4.1	5.3	1.1	1.4	1	1	1	6.4	4.5	5.3	1	1	1	1	1	4.1	1.9	2.1	2.3	1	1.1	1.1	1	4.6	1.8	2.5	1.4	1	1	1	1	2.3	5	1	2.2	1.3
S30	ThreateningHumans_anger	40	male	90	329	7	2.75	3.25	18	19	15	15	6.2	4.1	5.3	1.1	1.4	1	1	1	6.4	4.5	5.3	1	1	1	1	1	4.1	1.9	2.1	2.3	1	1.1	1.1	1	4.6	1.8	2.5	1.4	1	1	1	1	2.3	5	1	2.2	1.3
S30	ThreateningHumans_surprise	40	male	90	329	7	2.75	3.25	18	19	15	15	6.2	4.1	5.3	1.1	1.4	1	1	1	6.4	4.5	5.3	1	1	1	1	1	4.1	1.9	2.1	2.3	1	1.1	1.1	1	4.6	1.8	2.5	1.4	1	1	1	1	2.3	5	1	2.2	1.3
S30	PleasantDogs_arousal	40	male	90	329	7	2.75	3.25	18	19	15	15	6.2	4.1	5.3	1.1	1.4	1	1	1	6.4	4.5	5.3	1	1	1	1	1	4.1	1.9	2.1	2.3	1	1.1	1.1	1	4.6	1.8	2.5	1.4	1	1	1	1	2.3	5	1	2.2	1.3
S30	PleasantDogs_happiness	40	male	90	329	7	2.75	3.25	18	19	15	15	6.2	4.1	5.3	1.1	1.4	1	1	1	6.4	4.5	5.3	1	1	1	1	1	4.1	1.9	2.1	2.3	1	1.1	1.1	1	4.6	1.8	2.5	1.4	1	1	1	1	2.3	5	1	2.2	1.3
S30	PleasantDogs_disgust	40	male	90	329	7	2.75	3.25	18	19	15	15	6.2	4.1	5.3	1.1	1.4	1	1	1	6.4	4.5	5.3	1	1	1	1	1	4.1	1.9	2.1	2.3	1	1.1	1.1	1	4.6	1.8	2.5	1.4	1	1	1	1	2.3	5	1	2.2	1.3
S30	PleasantDogs_fear	40	male	90	329	7	2.75	3.25	18	19	15	15	6.2	4.1	5.3	1.1	1.4	1	1	1	6.4	4.5	5.3	1	1	1	1	1	4.1	1.9	2.1	2.3	1	1.1	1.1	1	4.6	1.8	2.5	1.4	1	1	1	1	2.3	5	1	2.2	1.3
S30	PleasantDogs_sadness	40	male	90	329	7	2.75	3.25	18	19	15	15	6.2	4.1	5.3	1.1	1.4	1	1	1	6.4	4.5	5.3	1	1	1	1	1	4.1	1.9	2.1	2.3	1	1.1	1.1	1	4.6	1.8	2.5	1.4	1	1	1	1	2.3	5	1	2.2	1.3
S30	PleasantDogs_valence	40	male	90	329	7	2.75	3.25	18	19	15	15	6.2	4.1	5.3	1.1	1.4	1	1	1	6.4	4.5	5.3	1	1	1	1	1	4.1	1.9	2.1	2.3	1	1.1	1.1	1	4.6	1.8	2.5	1.4	1	1	1	1	2.3	5	1	2.2	1.3
S30	PleasantDogs_anger	40	male	90	329	7	2.75	3.25	18	19	15	15	6.2	4.1	5.3	1.1	1.4	1	1	1	6.4	4.5	5.3	1	1	1	1	1	4.1	1.9	2.1	2.3	1	1.1	1.1	1	4.6	1.8	2.5	1.4	1	1	1	1	2.3	5	1	2.2	1.3
S30	PleasantDogs_surprise	40	male	90	329	7	2.75	3.25	18	19	15	15	6.2	4.1	5.3	1.1	1.4	1	1	1	6.4	4.5	5.3	1	1	1	1	1	4.1	1.9	2.1	2.3	1	1.1	1.1	1	4.6	1.8	2.5	1.4	1	1	1	1	2.3	5	1	2.2	1.3
S30	PleasantHumans_arousal	40	male	90	329	7	2.75	3.25	18	19	15	15	6.2	4.1	5.3	1.1	1.4	1	1	1	6.4	4.5	5.3	1	1	1	1	1	4.1	1.9	2.1	2.3	1	1.1	1.1	1	4.6	1.8	2.5	1.4	1	1	1	1	2.3	5	1	2.2	1.3
S30	PleasantHumans_happiness	40	male	90	329	7	2.75	3.25	18	19	15	15	6.2	4.1	5.3	1.1	1.4	1	1	1	6.4	4.5	5.3	1	1	1	1	1	4.1	1.9	2.1	2.3	1	1.1	1.1	1	4.6	1.8	2.5	1.4	1	1	1	1	2.3	5	1	2.2	1.3
S30	PleasantHumans_disgust	40	male	90	329	7	2.75	3.25	18	19	15	15	6.2	4.1	5.3	1.1	1.4	1	1	1	6.4	4.5	5.3	1	1	1	1	1	4.1	1.9	2.1	2.3	1	1.1	1.1	1	4.6	1.8	2.5	1.4	1	1	1	1	2.3	5	1	2.2	1.3
S30	PleasantHumans_fear	40	male	90	329	7	2.75	3.25	18	19	15	15	6.2	4.1	5.3	1.1	1.4	1	1	1	6.4	4.5	5.3	1	1	1	1	1	4.1	1.9	2.1	2.3	1	1.1	1.1	1	4.6	1.8	2.5	1.4	1	1	1	1	2.3	5	1	2.2	1.3
S30	PleasantHumans_sadness	40	male	90	329	7	2.75	3.25	18	19	15	15	6.2	4.1	5.3	1.1	1.4	1	1	1	6.4	4.5	5.3	1	1	1	1	1	4.1	1.9	2.1	2.3	1	1.1	1.1	1	4.6	1.8	2.5	1.4	1	1	1	1	2.3	5	1	2.2	1.3
S30	PleasantHumans_valence	40	male	90	329	7	2.75	3.25	18	19	15	15	6.2	4.1	5.3	1.1	1.4	1	1	1	6.4	4.5	5.3	1	1	1	1	1	4.1	1.9	2.1	2.3	1	1.1	1.1	1	4.6	1.8	2.5	1.4	1	1	1	1	2.3	5	1	2.2	1.3
S30	PleasantHumans_anger	40	male	90	329	7	2.75	3.25	18	19	15	15	6.2	4.1	5.3	1.1	1.4	1	1	1	6.4	4.5	5.3	1	1	1	1	1	4.1	1.9	2.1	2.3	1	1.1	1.1	1	4.6	1.8	2.5	1.4	1	1	1	1	2.3	5	1	2.2	1.3
S30	PleasantHumans_surprise	40	male	90	329	7	2.75	3.25	18	19	15	15	6.2	4.1	5.3	1.1	1.4	1	1	1	6.4	4.5	5.3	1	1	1	1	1	4.1	1.9	2.1	2.3	1	1.1	1.1	1	4.6	1.8	2.5	1.4	1	1	1	1	2.3	5	1	2.2	1.3
S30	NeutralDogs_arousal	40	male	90	329	7	2.75	3.25	18	19	15	15	6.2	4.1	5.3	1.1	1.4	1	1	1	6.4	4.5	5.3	1	1	1	1	1	4.1	1.9	2.1	2.3	1	1.1	1.1	1	4.6	1.8	2.5	1.4	1	1	1	1	2.3	5	1	2.2	1.3
S30	NeutralDogs_happiness	40	male	90	329	7	2.75	3.25	18	19	15	15	6.2	4.1	5.3	1.1	1.4	1	1	1	6.4	4.5	5.3	1	1	1	1	1	4.1	1.9	2.1	2.3	1	1.1	1.1	1	4.6	1.8	2.5	1.4	1	1	1	1	2.3	5	1	2.2	1.3
S30	NeutralDogs_disgust	40	male	90	329	7	2.75	3.25	18	19	15	15	6.2	4.1	5.3	1.1	1.4	1	1	1	6.4	4.5	5.3	1	1	1	1	1	4.1	1.9	2.1	2.3	1	1.1	1.1	1	4.6	1.8	2.5	1.4	1	1	1	1	2.3	5	1	2.2	1.3
S30	NeutralDogs_fear	40	male	90	329	7	2.75	3.25	18	19	15	15	6.2	4.1	5.3	1.1	1.4	1	1	1	6.4	4.5	5.3	1	1	1	1	1	4.1	1.9	2.1	2.3	1	1.1	1.1	1	4.6	1.8	2.5	1.4	1	1	1	1	2.3	5	1	2.2	1.3
S30	NeutralDogs_sadness	40	male	90	329	7	2.75	3.25	18	19	15	15	6.2	4.1	5.3	1.1	1.4	1	1	1	6.4	4.5	5.3	1	1	1	1	1	4.1	1.9	2.1	2.3	1	1.1	1.1	1	4.6	1.8	2.5	1.4	1	1	1	1	2.3	5	1	2.2	1.3
S30	NeutralDogs_valence	40	male	90	329	7	2.75	3.25	18	19	15	15	6.2	4.1	5.3	1.1	1.4	1	1	1	6.4	4.5	5.3	1	1	1	1	1	4.1	1.9	2.1	2.3	1	1.1	1.1	1	4.6	1.8	2.5	1.4	1	1	1	1	2.3	5	1	2.2	1.3
S30	NeutralDogs_anger	40	male	90	329	7	2.75	3.25	18	19	15	15	6.2	4.1	5.3	1.1	1.4	1	1	1	6.4	4.5	5.3	1	1	1	1	1	4.1	1.9	2.1	2.3	1	1.1	1.1	1	4.6	1.8	2.5	1.4	1	1	1	1	2.3	5	1	2.2	1.3
S30	NeutralDogs_surprise	40	male	90	329	7	2.75	3.25	18	19	15	15	6.2	4.1	5.3	1.1	1.4	1	1	1	6.4	4.5	5.3	1	1	1	1	1	4.1	1.9	2.1	2.3	1	1.1	1.1	1	4.6	1.8	2.5	1.4	1	1	1	1	2.3	5	1	2.2	1.3
S30	NeutralHumans_arousal	40	male	90	329	7	2.75	3.25	18	19	15	15	6.2	4.1	5.3	1.1	1.4	1	1	1	6.4	4.5	5.3	1	1	1	1	1	4.1	1.9	2.1	2.3	1	1.1	1.1	1	4.6	1.8	2.5	1.4	1	1	1	1	2.3	5	1	2.2	1.3
S30	NeutralHumans_happiness	40	male	90	329	7	2.75	3.25	18	19	15	15	6.2	4.1	5.3	1.1	1.4	1	1	1	6.4	4.5	5.3	1	1	1	1	1	4.1	1.9	2.1	2.3	1	1.1	1.1	1	4.6	1.8	2.5	1.4	1	1	1	1	2.3	5	1	2.2	1.3
S30	NeutralHumans_disgust	40	male	90	329	7	2.75	3.25	18	19	15	15	6.2	4.1	5.3	1.1	1.4	1	1	1	6.4	4.5	5.3	1	1	1	1	1	4.1	1.9	2.1	2.3	1	1.1	1.1	1	4.6	1.8	2.5	1.4	1	1	1	1	2.3	5	1	2.2	1.3
S30	NeutralHumans_fear	40	male	90	329	7	2.75	3.25	18	19	15	15	6.2	4.1	5.3	1.1	1.4	1	1	1	6.4	4.5	5.3	1	1	1	1	1	4.1	1.9	2.1	2.3	1	1.1	1.1	1	4.6	1.8	2.5	1.4	1	1	1	1	2.3	5	1	2.2	1.3
S30	NeutralHumans_sadness	40	male	90	329	7	2.75	3.25	18	19	15	15	6.2	4.1	5.3	1.1	1.4	1	1	1	6.4	4.5	5.3	1	1	1	1	1	4.1	1.9	2.1	2.3	1	1.1	1.1	1	4.6	1.8	2.5	1.4	1	1	1	1	2.3	5	1	2.2	1.3
S30	NeutralHumans_valence	40	male	90	329	7	2.75	3.25	18	19	15	15	6.2	4.1	5.3	1.1	1.4	1	1	1	6.4	4.5	5.3	1	1	1	1	1	4.1	1.9	2.1	2.3	1	1.1	1.1	1	4.6	1.8	2.5	1.4	1	1	1	1	2.3	5	1	2.2	1.3
S30	NeutralHumans_anger	40	male	90	329	7	2.75	3.25	18	19	15	15	6.2	4.1	5.3	1.1	1.4	1	1	1	6.4	4.5	5.3	1	1	1	1	1	4.1	1.9	2.1	2.3	1	1.1	1.1	1	4.6	1.8	2.5	1.4	1	1	1	1	2.3	5	1	2.2	1.3
S30	NeutralHumans_surprise	40	male	90	329	7	2.75	3.25	18	19	15	15	6.2	4.1	5.3	1.1	1.4	1	1	1	6.4	4.5	5.3	1	1	1	1	1	4.1	1.9	2.1	2.3	1	1.1	1.1	1	4.6	1.8	2.5	1.4	1	1	1	1	2.3	5	1	2.2	1.3
S30	Object_arousal	40	male	90	329	7	2.75	3.25	18	19	15	15	6.2	4.1	5.3	1.1	1.4	1	1	1	6.4	4.5	5.3	1	1	1	1	1	4.1	1.9	2.1	2.3	1	1.1	1.1	1	4.6	1.8	2.5	1.4	1	1	1	1	2.3	5	1	2.2	1.3
S30	Object_happiness	40	male	90	329	7	2.75	3.25	18	19	15	15	6.2	4.1	5.3	1.1	1.4	1	1	1	6.4	4.5	5.3	1	1	1	1	1	4.1	1.9	2.1	2.3	1	1.1	1.1	1	4.6	1.8	2.5	1.4	1	1	1	1	2.3	5	1	2.2	1.3
S30	Object_disgust	40	male	90	329	7	2.75	3.25	18	19	15	15	6.2	4.1	5.3	1.1	1.4	1	1	1	6.4	4.5	5.3	1	1	1	1	1	4.1	1.9	2.1	2.3	1	1.1	1.1	1	4.6	1.8	2.5	1.4	1	1	1	1	2.3	5	1	2.2	1.3
S30	Object_fear	40	male	90	329	7	2.75	3.25	18	19	15	15	6.2	4.1	5.3	1.1	1.4	1	1	1	6.4	4.5	5.3	1	1	1	1	1	4.1	1.9	2.1	2.3	1	1.1	1.1	1	4.6	1.8	2.5	1.4	1	1	1	1	2.3	5	1	2.2	1.3
S30	Object_sadness	40	male	90	329	7	2.75	3.25	18	19	15	15	6.2	4.1	5.3	1.1	1.4	1	1	1	6.4	4.5	5.3	1	1	1	1	1	4.1	1.9	2.1	2.3	1	1.1	1.1	1	4.6	1.8	2.5	1.4	1	1	1	1	2.3	5	1	2.2	1.3
S30	Object_valence	40	male	90	329	7	2.75	3.25	18	19	15	15	6.2	4.1	5.3	1.1	1.4	1	1	1	6.4	4.5	5.3	1	1	1	1	1	4.1	1.9	2.1	2.3	1	1.1	1.1	1	4.6	1.8	2.5	1.4	1	1	1	1	2.3	5	1	2.2	1.3
S30	Object_anger	40	male	90	329	7	2.75	3.25	18	19	15	15	6.2	4.1	5.3	1.1	1.4	1	1	1	6.4	4.5	5.3	1	1	1	1	1	4.1	1.9	2.1	2.3	1	1.1	1.1	1	4.6	1.8	2.5	1.4	1	1	1	1	2.3	5	1	2.2	1.3
S30	Object_surprise	40	male	90	329	7	2.75	3.25	18	19	15	15	6.2	4.1	5.3	1.1	1.4	1	1	1	6.4	4.5	5.3	1	1	1	1	1	4.1	1.9	2.1	2.3	1	1.1	1.1	1	4.6	1.8	2.5	1.4	1	1	1	1	2.3	5	1	2.2	1.3
S30	Pixel_arousal	40	male	90	329	7	2.75	3.25	18	19	15	15	6.2	4.1	5.3	1.1	1.4	1	1	1	6.4	4.5	5.3	1	1	1	1	1	4.1	1.9	2.1	2.3	1	1.1	1.1	1	4.6	1.8	2.5	1.4	1	1	1	1	2.3	5	1	2.2	1.3
S30	Pixel_happiness	40	male	90	329	7	2.75	3.25	18	19	15	15	6.2	4.1	5.3	1.1	1.4	1	1	1	6.4	4.5	5.3	1	1	1	1	1	4.1	1.9	2.1	2.3	1	1.1	1.1	1	4.6	1.8	2.5	1.4	1	1	1	1	2.3	5	1	2.2	1.3
S30	Pixel_disgust	40	male	90	329	7	2.75	3.25	18	19	15	15	6.2	4.1	5.3	1.1	1.4	1	1	1	6.4	4.5	5.3	1	1	1	1	1	4.1	1.9	2.1	2.3	1	1.1	1.1	1	4.6	1.8	2.5	1.4	1	1	1	1	2.3	5	1	2.2	1.3
S30	Pixel_fear	40	male	90	329	7	2.75	3.25	18	19	15	15	6.2	4.1	5.3	1.1	1.4	1	1	1	6.4	4.5	5.3	1	1	1	1	1	4.1	1.9	2.1	2.3	1	1.1	1.1	1	4.6	1.8	2.5	1.4	1	1	1	1	2.3	5	1	2.2	1.3
S30	Pixel_sadness	40	male	90	329	7	2.75	3.25	18	19	15	15	6.2	4.1	5.3	1.1	1.4	1	1	1	6.4	4.5	5.3	1	1	1	1	1	4.1	1.9	2.1	2.3	1	1.1	1.1	1	4.6	1.8	2.5	1.4	1	1	1	1	2.3	5	1	2.2	1.3
S30	Pixel_valence	40	male	90	329	7	2.75	3.25	18	19	15	15	6.2	4.1	5.3	1.1	1.4	1	1	1	6.4	4.5	5.3	1	1	1	1	1	4.1	1.9	2.1	2.3	1	1.1	1.1	1	4.6	1.8	2.5	1.4	1	1	1	1	2.3	5	1	2.2	1.3
S30	Pixel_anger	40	male	90	329	7	2.75	3.25	18	19	15	15	6.2	4.1	5.3	1.1	1.4	1	1	1	6.4	4.5	5.3	1	1	1	1	1	4.1	1.9	2.1	2.3	1	1.1	1.1	1	4.6	1.8	2.5	1.4	1	1	1	1	2.3	5	1	2.2	1.3
S30	Pixel_surprise	40	male	90	329	7	2.75	3.25	18	19	15	15	6.2	4.1	5.3	1.1	1.4	1	1	1	6.4	4.5	5.3	1	1	1	1	1	4.1	1.9	2.1	2.3	1	1.1	1.1	1	4.6	1.8	2.5	1.4	1	1	1	1	2.3	5	1	2.2	1.3
S31	ThreateningDogs_arousal	46	female	100	499	17	4.13	3.13	20	13	27	24	6.6	5	6.1	1.2	1.9	1	1.1	1	5.4	4.4	4.7	1.2	3.6	1.2	1.4	1.2	3.9	2.2	1.7	2.3	1	2.1	1.3	1.8	4.2	3.4	2.4	1.5	2.3	1.3	1.8	1.5	2.6	6.1	1.6	2.5	2.2
S31	ThreateningDogs_happiness	46	female	100	499	17	4.13	3.13	20	13	27	24	6.6	5	6.1	1.2	1.9	1	1.1	1	5.4	4.4	4.7	1.2	3.6	1.2	1.4	1.2	3.9	2.2	1.7	2.3	1	2.1	1.3	1.8	4.2	3.4	2.4	1.5	2.3	1.3	1.8	1.5	2.6	6.1	1.6	2.5	2.2
S31	ThreateningDogs_disgust	46	female	100	499	17	4.13	3.13	20	13	27	24	6.6	5	6.1	1.2	1.9	1	1.1	1	5.4	4.4	4.7	1.2	3.6	1.2	1.4	1.2	3.9	2.2	1.7	2.3	1	2.1	1.3	1.8	4.2	3.4	2.4	1.5	2.3	1.3	1.8	1.5	2.6	6.1	1.6	2.5	2.2
S31	ThreateningDogs_fear	46	female	100	499	17	4.13	3.13	20	13	27	24	6.6	5	6.1	1.2	1.9	1	1.1	1	5.4	4.4	4.7	1.2	3.6	1.2	1.4	1.2	3.9	2.2	1.7	2.3	1	2.1	1.3	1.8	4.2	3.4	2.4	1.5	2.3	1.3	1.8	1.5	2.6	6.1	1.6	2.5	2.2
S31	ThreateningDogs_sadness	46	female	100	499	17	4.13	3.13	20	13	27	24	6.6	5	6.1	1.2	1.9	1	1.1	1	5.4	4.4	4.7	1.2	3.6	1.2	1.4	1.2	3.9	2.2	1.7	2.3	1	2.1	1.3	1.8	4.2	3.4	2.4	1.5	2.3	1.3	1.8	1.5	2.6	6.1	1.6	2.5	2.2
S31	ThreateningDogs_valence	46	female	100	499	17	4.13	3.13	20	13	27	24	6.6	5	6.1	1.2	1.9	1	1.1	1	5.4	4.4	4.7	1.2	3.6	1.2	1.4	1.2	3.9	2.2	1.7	2.3	1	2.1	1.3	1.8	4.2	3.4	2.4	1.5	2.3	1.3	1.8	1.5	2.6	6.1	1.6	2.5	2.2
S31	ThreateningDogs_anger	46	female	100	499	17	4.13	3.13	20	13	27	24	6.6	5	6.1	1.2	1.9	1	1.1	1	5.4	4.4	4.7	1.2	3.6	1.2	1.4	1.2	3.9	2.2	1.7	2.3	1	2.1	1.3	1.8	4.2	3.4	2.4	1.5	2.3	1.3	1.8	1.5	2.6	6.1	1.6	2.5	2.2
S31	ThreateningDogs_surprise	46	female	100	499	17	4.13	3.13	20	13	27	24	6.6	5	6.1	1.2	1.9	1	1.1	1	5.4	4.4	4.7	1.2	3.6	1.2	1.4	1.2	3.9	2.2	1.7	2.3	1	2.1	1.3	1.8	4.2	3.4	2.4	1.5	2.3	1.3	1.8	1.5	2.6	6.1	1.6	2.5	2.2
S31	ThreateningHumans_arousal	46	female	100	499	17	4.13	3.13	20	13	27	24	6.6	5	6.1	1.2	1.9	1	1.1	1	5.4	4.4	4.7	1.2	3.6	1.2	1.4	1.2	3.9	2.2	1.7	2.3	1	2.1	1.3	1.8	4.2	3.4	2.4	1.5	2.3	1.3	1.8	1.5	2.6	6.1	1.6	2.5	2.2
S31	ThreateningHumans_happiness	46	female	100	499	17	4.13	3.13	20	13	27	24	6.6	5	6.1	1.2	1.9	1	1.1	1	5.4	4.4	4.7	1.2	3.6	1.2	1.4	1.2	3.9	2.2	1.7	2.3	1	2.1	1.3	1.8	4.2	3.4	2.4	1.5	2.3	1.3	1.8	1.5	2.6	6.1	1.6	2.5	2.2
S31	ThreateningHumans_disgust	46	female	100	499	17	4.13	3.13	20	13	27	24	6.6	5	6.1	1.2	1.9	1	1.1	1	5.4	4.4	4.7	1.2	3.6	1.2	1.4	1.2	3.9	2.2	1.7	2.3	1	2.1	1.3	1.8	4.2	3.4	2.4	1.5	2.3	1.3	1.8	1.5	2.6	6.1	1.6	2.5	2.2
S31	ThreateningHumans_fear	46	female	100	499	17	4.13	3.13	20	13	27	24	6.6	5	6.1	1.2	1.9	1	1.1	1	5.4	4.4	4.7	1.2	3.6	1.2	1.4	1.2	3.9	2.2	1.7	2.3	1	2.1	1.3	1.8	4.2	3.4	2.4	1.5	2.3	1.3	1.8	1.5	2.6	6.1	1.6	2.5	2.2
S31	ThreateningHumans_sadness	46	female	100	499	17	4.13	3.13	20	13	27	24	6.6	5	6.1	1.2	1.9	1	1.1	1	5.4	4.4	4.7	1.2	3.6	1.2	1.4	1.2	3.9	2.2	1.7	2.3	1	2.1	1.3	1.8	4.2	3.4	2.4	1.5	2.3	1.3	1.8	1.5	2.6	6.1	1.6	2.5	2.2
S31	ThreateningHumans_valence	46	female	100	499	17	4.13	3.13	20	13	27	24	6.6	5	6.1	1.2	1.9	1	1.1	1	5.4	4.4	4.7	1.2	3.6	1.2	1.4	1.2	3.9	2.2	1.7	2.3	1	2.1	1.3	1.8	4.2	3.4	2.4	1.5	2.3	1.3	1.8	1.5	2.6	6.1	1.6	2.5	2.2
S31	ThreateningHumans_anger	46	female	100	499	17	4.13	3.13	20	13	27	24	6.6	5	6.1	1.2	1.9	1	1.1	1	5.4	4.4	4.7	1.2	3.6	1.2	1.4	1.2	3.9	2.2	1.7	2.3	1	2.1	1.3	1.8	4.2	3.4	2.4	1.5	2.3	1.3	1.8	1.5	2.6	6.1	1.6	2.5	2.2
S31	ThreateningHumans_surprise	46	female	100	499	17	4.13	3.13	20	13	27	24	6.6	5	6.1	1.2	1.9	1	1.1	1	5.4	4.4	4.7	1.2	3.6	1.2	1.4	1.2	3.9	2.2	1.7	2.3	1	2.1	1.3	1.8	4.2	3.4	2.4	1.5	2.3	1.3	1.8	1.5	2.6	6.1	1.6	2.5	2.2
S31	PleasantDogs_arousal	46	female	100	499	17	4.13	3.13	20	13	27	24	6.6	5	6.1	1.2	1.9	1	1.1	1	5.4	4.4	4.7	1.2	3.6	1.2	1.4	1.2	3.9	2.2	1.7	2.3	1	2.1	1.3	1.8	4.2	3.4	2.4	1.5	2.3	1.3	1.8	1.5	2.6	6.1	1.6	2.5	2.2
S31	PleasantDogs_happiness	46	female	100	499	17	4.13	3.13	20	13	27	24	6.6	5	6.1	1.2	1.9	1	1.1	1	5.4	4.4	4.7	1.2	3.6	1.2	1.4	1.2	3.9	2.2	1.7	2.3	1	2.1	1.3	1.8	4.2	3.4	2.4	1.5	2.3	1.3	1.8	1.5	2.6	6.1	1.6	2.5	2.2
S31	PleasantDogs_disgust	46	female	100	499	17	4.13	3.13	20	13	27	24	6.6	5	6.1	1.2	1.9	1	1.1	1	5.4	4.4	4.7	1.2	3.6	1.2	1.4	1.2	3.9	2.2	1.7	2.3	1	2.1	1.3	1.8	4.2	3.4	2.4	1.5	2.3	1.3	1.8	1.5	2.6	6.1	1.6	2.5	2.2
S31	PleasantDogs_fear	46	female	100	499	17	4.13	3.13	20	13	27	24	6.6	5	6.1	1.2	1.9	1	1.1	1	5.4	4.4	4.7	1.2	3.6	1.2	1.4	1.2	3.9	2.2	1.7	2.3	1	2.1	1.3	1.8	4.2	3.4	2.4	1.5	2.3	1.3	1.8	1.5	2.6	6.1	1.6	2.5	2.2
S31	PleasantDogs_sadness	46	female	100	499	17	4.13	3.13	20	13	27	24	6.6	5	6.1	1.2	1.9	1	1.1	1	5.4	4.4	4.7	1.2	3.6	1.2	1.4	1.2	3.9	2.2	1.7	2.3	1	2.1	1.3	1.8	4.2	3.4	2.4	1.5	2.3	1.3	1.8	1.5	2.6	6.1	1.6	2.5	2.2
S31	PleasantDogs_valence	46	female	100	499	17	4.13	3.13	20	13	27	24	6.6	5	6.1	1.2	1.9	1	1.1	1	5.4	4.4	4.7	1.2	3.6	1.2	1.4	1.2	3.9	2.2	1.7	2.3	1	2.1	1.3	1.8	4.2	3.4	2.4	1.5	2.3	1.3	1.8	1.5	2.6	6.1	1.6	2.5	2.2
S31	PleasantDogs_anger	46	female	100	499	17	4.13	3.13	20	13	27	24	6.6	5	6.1	1.2	1.9	1	1.1	1	5.4	4.4	4.7	1.2	3.6	1.2	1.4	1.2	3.9	2.2	1.7	2.3	1	2.1	1.3	1.8	4.2	3.4	2.4	1.5	2.3	1.3	1.8	1.5	2.6	6.1	1.6	2.5	2.2
S31	PleasantDogs_surprise	46	female	100	499	17	4.13	3.13	20	13	27	24	6.6	5	6.1	1.2	1.9	1	1.1	1	5.4	4.4	4.7	1.2	3.6	1.2	1.4	1.2	3.9	2.2	1.7	2.3	1	2.1	1.3	1.8	4.2	3.4	2.4	1.5	2.3	1.3	1.8	1.5	2.6	6.1	1.6	2.5	2.2
S31	PleasantHumans_arousal	46	female	100	499	17	4.13	3.13	20	13	27	24	6.6	5	6.1	1.2	1.9	1	1.1	1	5.4	4.4	4.7	1.2	3.6	1.2	1.4	1.2	3.9	2.2	1.7	2.3	1	2.1	1.3	1.8	4.2	3.4	2.4	1.5	2.3	1.3	1.8	1.5	2.6	6.1	1.6	2.5	2.2
S31	PleasantHumans_happiness	46	female	100	499	17	4.13	3.13	20	13	27	24	6.6	5	6.1	1.2	1.9	1	1.1	1	5.4	4.4	4.7	1.2	3.6	1.2	1.4	1.2	3.9	2.2	1.7	2.3	1	2.1	1.3	1.8	4.2	3.4	2.4	1.5	2.3	1.3	1.8	1.5	2.6	6.1	1.6	2.5	2.2
S31	PleasantHumans_disgust	46	female	100	499	17	4.13	3.13	20	13	27	24	6.6	5	6.1	1.2	1.9	1	1.1	1	5.4	4.4	4.7	1.2	3.6	1.2	1.4	1.2	3.9	2.2	1.7	2.3	1	2.1	1.3	1.8	4.2	3.4	2.4	1.5	2.3	1.3	1.8	1.5	2.6	6.1	1.6	2.5	2.2
S31	PleasantHumans_fear	46	female	100	499	17	4.13	3.13	20	13	27	24	6.6	5	6.1	1.2	1.9	1	1.1	1	5.4	4.4	4.7	1.2	3.6	1.2	1.4	1.2	3.9	2.2	1.7	2.3	1	2.1	1.3	1.8	4.2	3.4	2.4	1.5	2.3	1.3	1.8	1.5	2.6	6.1	1.6	2.5	2.2
S31	PleasantHumans_sadness	46	female	100	499	17	4.13	3.13	20	13	27	24	6.6	5	6.1	1.2	1.9	1	1.1	1	5.4	4.4	4.7	1.2	3.6	1.2	1.4	1.2	3.9	2.2	1.7	2.3	1	2.1	1.3	1.8	4.2	3.4	2.4	1.5	2.3	1.3	1.8	1.5	2.6	6.1	1.6	2.5	2.2
S31	PleasantHumans_valence	46	female	100	499	17	4.13	3.13	20	13	27	24	6.6	5	6.1	1.2	1.9	1	1.1	1	5.4	4.4	4.7	1.2	3.6	1.2	1.4	1.2	3.9	2.2	1.7	2.3	1	2.1	1.3	1.8	4.2	3.4	2.4	1.5	2.3	1.3	1.8	1.5	2.6	6.1	1.6	2.5	2.2
S31	PleasantHumans_anger	46	female	100	499	17	4.13	3.13	20	13	27	24	6.6	5	6.1	1.2	1.9	1	1.1	1	5.4	4.4	4.7	1.2	3.6	1.2	1.4	1.2	3.9	2.2	1.7	2.3	1	2.1	1.3	1.8	4.2	3.4	2.4	1.5	2.3	1.3	1.8	1.5	2.6	6.1	1.6	2.5	2.2
S31	PleasantHumans_surprise	46	female	100	499	17	4.13	3.13	20	13	27	24	6.6	5	6.1	1.2	1.9	1	1.1	1	5.4	4.4	4.7	1.2	3.6	1.2	1.4	1.2	3.9	2.2	1.7	2.3	1	2.1	1.3	1.8	4.2	3.4	2.4	1.5	2.3	1.3	1.8	1.5	2.6	6.1	1.6	2.5	2.2
S31	NeutralDogs_arousal	46	female	100	499	17	4.13	3.13	20	13	27	24	6.6	5	6.1	1.2	1.9	1	1.1	1	5.4	4.4	4.7	1.2	3.6	1.2	1.4	1.2	3.9	2.2	1.7	2.3	1	2.1	1.3	1.8	4.2	3.4	2.4	1.5	2.3	1.3	1.8	1.5	2.6	6.1	1.6	2.5	2.2
S31	NeutralDogs_happiness	46	female	100	499	17	4.13	3.13	20	13	27	24	6.6	5	6.1	1.2	1.9	1	1.1	1	5.4	4.4	4.7	1.2	3.6	1.2	1.4	1.2	3.9	2.2	1.7	2.3	1	2.1	1.3	1.8	4.2	3.4	2.4	1.5	2.3	1.3	1.8	1.5	2.6	6.1	1.6	2.5	2.2
S31	NeutralDogs_disgust	46	female	100	499	17	4.13	3.13	20	13	27	24	6.6	5	6.1	1.2	1.9	1	1.1	1	5.4	4.4	4.7	1.2	3.6	1.2	1.4	1.2	3.9	2.2	1.7	2.3	1	2.1	1.3	1.8	4.2	3.4	2.4	1.5	2.3	1.3	1.8	1.5	2.6	6.1	1.6	2.5	2.2
S31	NeutralDogs_fear	46	female	100	499	17	4.13	3.13	20	13	27	24	6.6	5	6.1	1.2	1.9	1	1.1	1	5.4	4.4	4.7	1.2	3.6	1.2	1.4	1.2	3.9	2.2	1.7	2.3	1	2.1	1.3	1.8	4.2	3.4	2.4	1.5	2.3	1.3	1.8	1.5	2.6	6.1	1.6	2.5	2.2
S31	NeutralDogs_sadness	46	female	100	499	17	4.13	3.13	20	13	27	24	6.6	5	6.1	1.2	1.9	1	1.1	1	5.4	4.4	4.7	1.2	3.6	1.2	1.4	1.2	3.9	2.2	1.7	2.3	1	2.1	1.3	1.8	4.2	3.4	2.4	1.5	2.3	1.3	1.8	1.5	2.6	6.1	1.6	2.5	2.2
S31	NeutralDogs_valence	46	female	100	499	17	4.13	3.13	20	13	27	24	6.6	5	6.1	1.2	1.9	1	1.1	1	5.4	4.4	4.7	1.2	3.6	1.2	1.4	1.2	3.9	2.2	1.7	2.3	1	2.1	1.3	1.8	4.2	3.4	2.4	1.5	2.3	1.3	1.8	1.5	2.6	6.1	1.6	2.5	2.2
S31	NeutralDogs_anger	46	female	100	499	17	4.13	3.13	20	13	27	24	6.6	5	6.1	1.2	1.9	1	1.1	1	5.4	4.4	4.7	1.2	3.6	1.2	1.4	1.2	3.9	2.2	1.7	2.3	1	2.1	1.3	1.8	4.2	3.4	2.4	1.5	2.3	1.3	1.8	1.5	2.6	6.1	1.6	2.5	2.2
S31	NeutralDogs_surprise	46	female	100	499	17	4.13	3.13	20	13	27	24	6.6	5	6.1	1.2	1.9	1	1.1	1	5.4	4.4	4.7	1.2	3.6	1.2	1.4	1.2	3.9	2.2	1.7	2.3	1	2.1	1.3	1.8	4.2	3.4	2.4	1.5	2.3	1.3	1.8	1.5	2.6	6.1	1.6	2.5	2.2
S31	NeutralHumans_arousal	46	female	100	499	17	4.13	3.13	20	13	27	24	6.6	5	6.1	1.2	1.9	1	1.1	1	5.4	4.4	4.7	1.2	3.6	1.2	1.4	1.2	3.9	2.2	1.7	2.3	1	2.1	1.3	1.8	4.2	3.4	2.4	1.5	2.3	1.3	1.8	1.5	2.6	6.1	1.6	2.5	2.2
S31	NeutralHumans_happiness	46	female	100	499	17	4.13	3.13	20	13	27	24	6.6	5	6.1	1.2	1.9	1	1.1	1	5.4	4.4	4.7	1.2	3.6	1.2	1.4	1.2	3.9	2.2	1.7	2.3	1	2.1	1.3	1.8	4.2	3.4	2.4	1.5	2.3	1.3	1.8	1.5	2.6	6.1	1.6	2.5	2.2
S31	NeutralHumans_disgust	46	female	100	499	17	4.13	3.13	20	13	27	24	6.6	5	6.1	1.2	1.9	1	1.1	1	5.4	4.4	4.7	1.2	3.6	1.2	1.4	1.2	3.9	2.2	1.7	2.3	1	2.1	1.3	1.8	4.2	3.4	2.4	1.5	2.3	1.3	1.8	1.5	2.6	6.1	1.6	2.5	2.2
S31	NeutralHumans_fear	46	female	100	499	17	4.13	3.13	20	13	27	24	6.6	5	6.1	1.2	1.9	1	1.1	1	5.4	4.4	4.7	1.2	3.6	1.2	1.4	1.2	3.9	2.2	1.7	2.3	1	2.1	1.3	1.8	4.2	3.4	2.4	1.5	2.3	1.3	1.8	1.5	2.6	6.1	1.6	2.5	2.2
S31	NeutralHumans_sadness	46	female	100	499	17	4.13	3.13	20	13	27	24	6.6	5	6.1	1.2	1.9	1	1.1	1	5.4	4.4	4.7	1.2	3.6	1.2	1.4	1.2	3.9	2.2	1.7	2.3	1	2.1	1.3	1.8	4.2	3.4	2.4	1.5	2.3	1.3	1.8	1.5	2.6	6.1	1.6	2.5	2.2
S31	NeutralHumans_valence	46	female	100	499	17	4.13	3.13	20	13	27	24	6.6	5	6.1	1.2	1.9	1	1.1	1	5.4	4.4	4.7	1.2	3.6	1.2	1.4	1.2	3.9	2.2	1.7	2.3	1	2.1	1.3	1.8	4.2	3.4	2.4	1.5	2.3	1.3	1.8	1.5	2.6	6.1	1.6	2.5	2.2
S31	NeutralHumans_anger	46	female	100	499	17	4.13	3.13	20	13	27	24	6.6	5	6.1	1.2	1.9	1	1.1	1	5.4	4.4	4.7	1.2	3.6	1.2	1.4	1.2	3.9	2.2	1.7	2.3	1	2.1	1.3	1.8	4.2	3.4	2.4	1.5	2.3	1.3	1.8	1.5	2.6	6.1	1.6	2.5	2.2
S31	NeutralHumans_surprise	46	female	100	499	17	4.13	3.13	20	13	27	24	6.6	5	6.1	1.2	1.9	1	1.1	1	5.4	4.4	4.7	1.2	3.6	1.2	1.4	1.2	3.9	2.2	1.7	2.3	1	2.1	1.3	1.8	4.2	3.4	2.4	1.5	2.3	1.3	1.8	1.5	2.6	6.1	1.6	2.5	2.2
S31	Object_arousal	46	female	100	499	17	4.13	3.13	20	13	27	24	6.6	5	6.1	1.2	1.9	1	1.1	1	5.4	4.4	4.7	1.2	3.6	1.2	1.4	1.2	3.9	2.2	1.7	2.3	1	2.1	1.3	1.8	4.2	3.4	2.4	1.5	2.3	1.3	1.8	1.5	2.6	6.1	1.6	2.5	2.2
S31	Object_happiness	46	female	100	499	17	4.13	3.13	20	13	27	24	6.6	5	6.1	1.2	1.9	1	1.1	1	5.4	4.4	4.7	1.2	3.6	1.2	1.4	1.2	3.9	2.2	1.7	2.3	1	2.1	1.3	1.8	4.2	3.4	2.4	1.5	2.3	1.3	1.8	1.5	2.6	6.1	1.6	2.5	2.2
S31	Object_disgust	46	female	100	499	17	4.13	3.13	20	13	27	24	6.6	5	6.1	1.2	1.9	1	1.1	1	5.4	4.4	4.7	1.2	3.6	1.2	1.4	1.2	3.9	2.2	1.7	2.3	1	2.1	1.3	1.8	4.2	3.4	2.4	1.5	2.3	1.3	1.8	1.5	2.6	6.1	1.6	2.5	2.2
S31	Object_fear	46	female	100	499	17	4.13	3.13	20	13	27	24	6.6	5	6.1	1.2	1.9	1	1.1	1	5.4	4.4	4.7	1.2	3.6	1.2	1.4	1.2	3.9	2.2	1.7	2.3	1	2.1	1.3	1.8	4.2	3.4	2.4	1.5	2.3	1.3	1.8	1.5	2.6	6.1	1.6	2.5	2.2
S31	Object_sadness	46	female	100	499	17	4.13	3.13	20	13	27	24	6.6	5	6.1	1.2	1.9	1	1.1	1	5.4	4.4	4.7	1.2	3.6	1.2	1.4	1.2	3.9	2.2	1.7	2.3	1	2.1	1.3	1.8	4.2	3.4	2.4	1.5	2.3	1.3	1.8	1.5	2.6	6.1	1.6	2.5	2.2
S31	Object_valence	46	female	100	499	17	4.13	3.13	20	13	27	24	6.6	5	6.1	1.2	1.9	1	1.1	1	5.4	4.4	4.7	1.2	3.6	1.2	1.4	1.2	3.9	2.2	1.7	2.3	1	2.1	1.3	1.8	4.2	3.4	2.4	1.5	2.3	1.3	1.8	1.5	2.6	6.1	1.6	2.5	2.2
S31	Object_anger	46	female	100	499	17	4.13	3.13	20	13	27	24	6.6	5	6.1	1.2	1.9	1	1.1	1	5.4	4.4	4.7	1.2	3.6	1.2	1.4	1.2	3.9	2.2	1.7	2.3	1	2.1	1.3	1.8	4.2	3.4	2.4	1.5	2.3	1.3	1.8	1.5	2.6	6.1	1.6	2.5	2.2
S31	Object_surprise	46	female	100	499	17	4.13	3.13	20	13	27	24	6.6	5	6.1	1.2	1.9	1	1.1	1	5.4	4.4	4.7	1.2	3.6	1.2	1.4	1.2	3.9	2.2	1.7	2.3	1	2.1	1.3	1.8	4.2	3.4	2.4	1.5	2.3	1.3	1.8	1.5	2.6	6.1	1.6	2.5	2.2
S31	Pixel_arousal	46	female	100	499	17	4.13	3.13	20	13	27	24	6.6	5	6.1	1.2	1.9	1	1.1	1	5.4	4.4	4.7	1.2	3.6	1.2	1.4	1.2	3.9	2.2	1.7	2.3	1	2.1	1.3	1.8	4.2	3.4	2.4	1.5	2.3	1.3	1.8	1.5	2.6	6.1	1.6	2.5	2.2
S31	Pixel_happiness	46	female	100	499	17	4.13	3.13	20	13	27	24	6.6	5	6.1	1.2	1.9	1	1.1	1	5.4	4.4	4.7	1.2	3.6	1.2	1.4	1.2	3.9	2.2	1.7	2.3	1	2.1	1.3	1.8	4.2	3.4	2.4	1.5	2.3	1.3	1.8	1.5	2.6	6.1	1.6	2.5	2.2
S31	Pixel_disgust	46	female	100	499	17	4.13	3.13	20	13	27	24	6.6	5	6.1	1.2	1.9	1	1.1	1	5.4	4.4	4.7	1.2	3.6	1.2	1.4	1.2	3.9	2.2	1.7	2.3	1	2.1	1.3	1.8	4.2	3.4	2.4	1.5	2.3	1.3	1.8	1.5	2.6	6.1	1.6	2.5	2.2
S31	Pixel_fear	46	female	100	499	17	4.13	3.13	20	13	27	24	6.6	5	6.1	1.2	1.9	1	1.1	1	5.4	4.4	4.7	1.2	3.6	1.2	1.4	1.2	3.9	2.2	1.7	2.3	1	2.1	1.3	1.8	4.2	3.4	2.4	1.5	2.3	1.3	1.8	1.5	2.6	6.1	1.6	2.5	2.2
S31	Pixel_sadness	46	female	100	499	17	4.13	3.13	20	13	27	24	6.6	5	6.1	1.2	1.9	1	1.1	1	5.4	4.4	4.7	1.2	3.6	1.2	1.4	1.2	3.9	2.2	1.7	2.3	1	2.1	1.3	1.8	4.2	3.4	2.4	1.5	2.3	1.3	1.8	1.5	2.6	6.1	1.6	2.5	2.2
S31	Pixel_valence	46	female	100	499	17	4.13	3.13	20	13	27	24	6.6	5	6.1	1.2	1.9	1	1.1	1	5.4	4.4	4.7	1.2	3.6	1.2	1.4	1.2	3.9	2.2	1.7	2.3	1	2.1	1.3	1.8	4.2	3.4	2.4	1.5	2.3	1.3	1.8	1.5	2.6	6.1	1.6	2.5	2.2
S31	Pixel_anger	46	female	100	499	17	4.13	3.13	20	13	27	24	6.6	5	6.1	1.2	1.9	1	1.1	1	5.4	4.4	4.7	1.2	3.6	1.2	1.4	1.2	3.9	2.2	1.7	2.3	1	2.1	1.3	1.8	4.2	3.4	2.4	1.5	2.3	1.3	1.8	1.5	2.6	6.1	1.6	2.5	2.2
S31	Pixel_surprise	46	female	100	499	17	4.13	3.13	20	13	27	24	6.6	5	6.1	1.2	1.9	1	1.1	1	5.4	4.4	4.7	1.2	3.6	1.2	1.4	1.2	3.9	2.2	1.7	2.3	1	2.1	1.3	1.8	4.2	3.4	2.4	1.5	2.3	1.3	1.8	1.5	2.6	6.1	1.6	2.5	2.2
S32	ThreateningDogs_arousal	33	male	70	401	9	4	2	19	22	25	26	3.9	2.1	4.9	1	1.9	1	1	1	3.9	2.1	4.2	1	1.5	1	1	1	3.9	2.1	1.4	2.2	1	1.4	1	1.3	3.9	2.1	1.8	1.6	1.6	1.2	1.2	1	3.9	2.1	2	1.5	1.3
S32	ThreateningDogs_happiness	33	male	70	401	9	4	2	19	22	25	26	3.9	2.1	4.9	1	1.9	1	1	1	3.9	2.1	4.2	1	1.5	1	1	1	3.9	2.1	1.4	2.2	1	1.4	1	1.3	3.9	2.1	1.8	1.6	1.6	1.2	1.2	1	3.9	2.1	2	1.5	1.3
S32	ThreateningDogs_disgust	33	male	70	401	9	4	2	19	22	25	26	3.9	2.1	4.9	1	1.9	1	1	1	3.9	2.1	4.2	1	1.5	1	1	1	3.9	2.1	1.4	2.2	1	1.4	1	1.3	3.9	2.1	1.8	1.6	1.6	1.2	1.2	1	3.9	2.1	2	1.5	1.3
S32	ThreateningDogs_fear	33	male	70	401	9	4	2	19	22	25	26	3.9	2.1	4.9	1	1.9	1	1	1	3.9	2.1	4.2	1	1.5	1	1	1	3.9	2.1	1.4	2.2	1	1.4	1	1.3	3.9	2.1	1.8	1.6	1.6	1.2	1.2	1	3.9	2.1	2	1.5	1.3
S32	ThreateningDogs_sadness	33	male	70	401	9	4	2	19	22	25	26	3.9	2.1	4.9	1	1.9	1	1	1	3.9	2.1	4.2	1	1.5	1	1	1	3.9	2.1	1.4	2.2	1	1.4	1	1.3	3.9	2.1	1.8	1.6	1.6	1.2	1.2	1	3.9	2.1	2	1.5	1.3
S32	ThreateningDogs_valence	33	male	70	401	9	4	2	19	22	25	26	3.9	2.1	4.9	1	1.9	1	1	1	3.9	2.1	4.2	1	1.5	1	1	1	3.9	2.1	1.4	2.2	1	1.4	1	1.3	3.9	2.1	1.8	1.6	1.6	1.2	1.2	1	3.9	2.1	2	1.5	1.3
S32	ThreateningDogs_anger	33	male	70	401	9	4	2	19	22	25	26	3.9	2.1	4.9	1	1.9	1	1	1	3.9	2.1	4.2	1	1.5	1	1	1	3.9	2.1	1.4	2.2	1	1.4	1	1.3	3.9	2.1	1.8	1.6	1.6	1.2	1.2	1	3.9	2.1	2	1.5	1.3
S32	ThreateningDogs_surprise	33	male	70	401	9	4	2	19	22	25	26	3.9	2.1	4.9	1	1.9	1	1	1	3.9	2.1	4.2	1	1.5	1	1	1	3.9	2.1	1.4	2.2	1	1.4	1	1.3	3.9	2.1	1.8	1.6	1.6	1.2	1.2	1	3.9	2.1	2	1.5	1.3
S32	ThreateningHumans_arousal	33	male	70	401	9	4	2	19	22	25	26	3.9	2.1	4.9	1	1.9	1	1	1	3.9	2.1	4.2	1	1.5	1	1	1	3.9	2.1	1.4	2.2	1	1.4	1	1.3	3.9	2.1	1.8	1.6	1.6	1.2	1.2	1	3.9	2.1	2	1.5	1.3
S32	ThreateningHumans_happiness	33	male	70	401	9	4	2	19	22	25	26	3.9	2.1	4.9	1	1.9	1	1	1	3.9	2.1	4.2	1	1.5	1	1	1	3.9	2.1	1.4	2.2	1	1.4	1	1.3	3.9	2.1	1.8	1.6	1.6	1.2	1.2	1	3.9	2.1	2	1.5	1.3
S32	ThreateningHumans_disgust	33	male	70	401	9	4	2	19	22	25	26	3.9	2.1	4.9	1	1.9	1	1	1	3.9	2.1	4.2	1	1.5	1	1	1	3.9	2.1	1.4	2.2	1	1.4	1	1.3	3.9	2.1	1.8	1.6	1.6	1.2	1.2	1	3.9	2.1	2	1.5	1.3
S32	ThreateningHumans_fear	33	male	70	401	9	4	2	19	22	25	26	3.9	2.1	4.9	1	1.9	1	1	1	3.9	2.1	4.2	1	1.5	1	1	1	3.9	2.1	1.4	2.2	1	1.4	1	1.3	3.9	2.1	1.8	1.6	1.6	1.2	1.2	1	3.9	2.1	2	1.5	1.3
S32	ThreateningHumans_sadness	33	male	70	401	9	4	2	19	22	25	26	3.9	2.1	4.9	1	1.9	1	1	1	3.9	2.1	4.2	1	1.5	1	1	1	3.9	2.1	1.4	2.2	1	1.4	1	1.3	3.9	2.1	1.8	1.6	1.6	1.2	1.2	1	3.9	2.1	2	1.5	1.3
S32	ThreateningHumans_valence	33	male	70	401	9	4	2	19	22	25	26	3.9	2.1	4.9	1	1.9	1	1	1	3.9	2.1	4.2	1	1.5	1	1	1	3.9	2.1	1.4	2.2	1	1.4	1	1.3	3.9	2.1	1.8	1.6	1.6	1.2	1.2	1	3.9	2.1	2	1.5	1.3
S32	ThreateningHumans_anger	33	male	70	401	9	4	2	19	22	25	26	3.9	2.1	4.9	1	1.9	1	1	1	3.9	2.1	4.2	1	1.5	1	1	1	3.9	2.1	1.4	2.2	1	1.4	1	1.3	3.9	2.1	1.8	1.6	1.6	1.2	1.2	1	3.9	2.1	2	1.5	1.3
S32	ThreateningHumans_surprise	33	male	70	401	9	4	2	19	22	25	26	3.9	2.1	4.9	1	1.9	1	1	1	3.9	2.1	4.2	1	1.5	1	1	1	3.9	2.1	1.4	2.2	1	1.4	1	1.3	3.9	2.1	1.8	1.6	1.6	1.2	1.2	1	3.9	2.1	2	1.5	1.3
[truncated: 176 more rows]
[truncated: 37 more columns]
